# Supplementary material for: Dynamic transcriptional and chromatin accessibility landscape of medaka embryogenesis
Source: Genome Res. 2020 Jun;30(6):924–37. doi: 10.1101/gr.258871.119 (PMC7370878; doi:10.1101/gr.258871.119)
Supplement: Supplemental Material [file supp_gr.258871.119_Supplemental_Table_S1.xlsx]

## Sheet: Sheet1
Supplemental Table S1 : Summary of medaka samples surveyed by PacBio long-read RNA-seq, Illumina short-read RNA-seq, and ATAC-seq.
stage	replicate	technology	strain
stage 6	1	PacBio	d-rR-Tg(olvas-GFP) X Qurt
stage 11	1	PacBio	d-rR-Tg(olvas-GFP) X Qurt
stage 15	1	PacBio	d-rR-Tg(olvas-GFP) X Qurt
stage 19	1	PacBio	d-rR-Tg(olvas-GFP) X Qurt
stage 25	1	PacBio	d-rR-Tg(olvas-GFP) X Qurt
stage 29	1	PacBio	d-rR-Tg(olvas-GFP) X Qurt
stage 32	1	PacBio	d-rR-Tg(olvas-GFP) X Qurt
stage 36	1	PacBio	d-rR-Tg(olvas-GFP) X Qurt
stage 38	1	PacBio	d-rR-Tg(olvas-GFP) X Qurt
stage 40	1	PacBio	d-rR-Tg(olvas-GFP) X Qurt
10dph ovary	1	PacBio	d-rR-Tg(olvas-GFP) X Qurt
10dph testis	1	PacBio	d-rR-Tg(olvas-GFP) X Qurt
adult brain	1	PacBio	d-rR-Tg(olvas-GFP) X Qurt
adult heart	1	PacBio	d-rR-Tg(olvas-GFP) X Qurt
adult ovary	1	PacBio	d-rR-Tg(olvas-GFP) X Qurt
adult testis	1	PacBio	d-rR-Tg(olvas-GFP) X Qurt
adult gut	1	PacBio	d-rR-Tg(olvas-GFP) X Qurt
adult muscle	1	PacBio	d-rR-Tg(olvas-GFP) X Qurt
stage 6	1	RNA-seq	Hd-rR
stage 11	1	RNA-seq	Hd-rR
stage 15	1	RNA-seq	Hd-rR
stage 19	1	RNA-seq	Hd-rR
stage 25	1	RNA-seq	Hd-rR
stage 29	1	RNA-seq	Hd-rR
stage 32	1	RNA-seq	Hd-rR
stage 36	1	RNA-seq	Hd-rR
stage 38	1	RNA-seq	Hd-rR
stage 40	1	RNA-seq	Hd-rR
stage 41	1	RNA-seq	Hd-rR
stage 6	2	RNA-seq	Hd-rR
stage 11	2	RNA-seq	Hd-rR
stage 15	2	RNA-seq	Hd-rR
stage 19	2	RNA-seq	Hd-rR
stage 25	2	RNA-seq	Hd-rR
stage 29	2	RNA-seq	Hd-rR
stage 32	2	RNA-seq	Hd-rR
stage 36	2	RNA-seq	Hd-rR
stage 38	2	RNA-seq	Hd-rR
stage 40	2	RNA-seq	d-rR-Tg(olvas-GFP) X Qurt
stage 41	2	RNA-seq	d-rR-Tg(olvas-GFP) X Qurt
adult ovary	1	RNA-seq	d-rR-Tg(olvas-GFP) X Qurt
adult testis	1	RNA-seq	d-rR-Tg(olvas-GFP) X Qurt
stage 11	1	ATAC-seq	d-rR-Tg(olvas-GFP) X Qurt
stage 15	1	ATAC-seq	d-rR-Tg(olvas-GFP) X Qurt
stage 19	1	ATAC-seq	d-rR-Tg(olvas-GFP) X Qurt
stage 25	1	ATAC-seq	d-rR-Tg(olvas-GFP) X Qurt
stage 29	1	ATAC-seq	d-rR-Tg(olvas-GFP) X Qurt
stage 32	1	ATAC-seq	d-rR-Tg(olvas-GFP) X Qurt
stage 36	1	ATAC-seq	d-rR-Tg(olvas-GFP) X Qurt
stage 38	1	ATAC-seq	d-rR-Tg(olvas-GFP) X Qurt
stage 40	1	ATAC-seq	d-rR-Tg(olvas-GFP) X Qurt
stage 11	2	ATAC-seq	d-rR-Tg(olvas-GFP) X Qurt
stage 15	2	aTAC-seq	d-rR-Tg(olvas-GFP) X Qurt
stage 19	2	ATAC-seq	d-rR-Tg(olvas-GFP) X Qurt
stage 25	2	ATAC-seq	d-rR-Tg(olvas-GFP) X Qurt
stage 29	2	ATAC-seq	d-rR-Tg(olvas-GFP) X Qurt
stage 32	2	ATAC-seq	d-rR-Tg(olvas-GFP) X Qurt
stage 36	2	ATAC-seq	d-rR-Tg(olvas-GFP) X Qurt
stage 38	2	ATAC-seq	d-rR-Tg(olvas-GFP) X Qurt
stage 40	2	ATAC-seq	d-rR-Tg(olvas-GFP) X Qurt
