# Supplementary material for: Dynamic transcriptional and chromatin accessibility landscape of medaka embryogenesis
Source: Genome Res. 2020 Jun;30(6):924–37. doi: 10.1101/gr.258871.119 (PMC7370878; doi:10.1101/gr.258871.119)
Supplement: Supplemental Material [file supp_gr.258871.119_Supplemental_Table_S2.xlsx]

## Sheet: Sheet1
Supplemental Table S2 : List of transcription factors identified in this study.
IGDB	TF_Family	chr	start	end	strand
IGDB00075	Homeobox	1	1331257	1336249	-
IGDB00078	HTH	1	1437257	1519746	+
IGDB00083	zf-C2H2	1	1642274	1661808	-
IGDB00111	zf-C2H2	1	2662256	2665057	+
IGDB00168	zf-BED	1	5693177	5714398	+
IGDB00186	zf-C2H2	1	8366325	8377133	+
IGDB00191	zf-C2H2	1	8476848	8482131	-
IGDB00220	Fork_head	1	10350996	10351850	-
IGDB00221	zf-GATA	1	10352620	10358073	-
IGDB00224	HMG	1	10619865	10624958	-
IGDB00244	CSL	1	11952397	11975847	+
IGDB00286	zf-C2H2	1	15446341	15450831	-
IGDB00298	zf-C2H2	1	16241673	16245538	+
IGDB00329	Pou	1	18620080	18624873	+
IGDB00374	THAP	1	21466339	21468236	-
IGDB00399	zf-LITAF-like	1	23682164	23683902	-
IGDB00406	zf-C2H2	1	24084173	24095748	+
IGDB00436	THAP	1	26116779	26121404	-
IGDB00479	TF_bZIP	1	28900118	28900906	-
IGDB00491	Homeobox	1	29336666	29339863	-
IGDB00555	Homeobox	1	34743925	34745709	-
IGDB00556	Homeobox	1	34745808	34748711	-
IGDB00592	bHLH	1	36594607	36625804	+
IGDB00599	Homeobox	1	37021786	37024542	-
IGDB00658	bHLH	10	3393456	3394043	-
IGDB00748	bHLH	10	11599799	11605345	-
IGDB00758	ZBTB	10	12027892	12035635	-
IGDB00789	zf-C2H2	10	14171738	14176441	+
IGDB00795	Homeobox	10	14384586	14391820	-
IGDB00876	Homeobox	10	16068626	16087981	-
IGDB00926	bHLH	10	19143033	19143722	-
IGDB00938	Fork_head	10	20898102	20901206	-
IGDB00981	bHLH	10	26683967	26711531	+
IGDB00983	bHLH	10	26693996	26695505	-
IGDB00988	T-box	10	27039888	27045618	+
IGDB01016	Homeobox	10	30641617	30651840	-
IGDB01020	RHD	10	30827736	30872297	+
IGDB01024	COE	10	30888558	30997641	+
IGDB01043	SRF	11	556026	582367	+
IGDB01047	zf-C2H2	11	780195	787353	+
IGDB01103	Homeobox	11	2901919	2913579	-
IGDB01106	Homeobox	11	3068802	3073714	-
IGDB01156	zf-C2H2	11	3891490	3894213	+
IGDB01170	zf-C2H2	11	4605000	4612729	-
IGDB01171	zf-C2H2	11	4615609	4622999	-
IGDB01189	zf-C2H2	11	5436847	5446396	+
IGDB01248	CP2	11	7136394	7156540	-
IGDB01256	zf-C2H2	11	7466304	7506632	-
IGDB01258	zf-GATA	11	8350624	8476308	-
IGDB01261	MYB	11	9105530	9111881	-
IGDB01264	Fork_head	11	9296531	9298768	-
IGDB01278	bHLH	11	9816136	9816693	+
IGDB01290	Homeobox	11	10693798	10696527	+
IGDB01291	Homeobox	11	10698494	10700611	-
IGDB01299	Homeobox	11	11321145	11323334	-
IGDB01300	Homeobox	11	11347071	11350548	-
IGDB01301	Homeobox	11	11351355	11356595	-
IGDB01302	Homeobox	11	11379292	11383673	-
IGDB01303	Homeobox	11	11390479	11394760	+
IGDB01306	TF_bZIP	11	11494165	11512656	+
IGDB01321	bHLH	11	14505595	14514424	-
IGDB01327	TF_bZIP	11	14826794	14870171	+
IGDB01338	zf-C2H2	11	16012652	16017435	-
IGDB01364	RHD	11	17712046	17744386	-
IGDB01366	THR-like	11	17830159	17898890	+
IGDB01367	THR-like	11	17904501	17921151	-
IGDB01370	Fork_head	11	17979025	18025612	+
IGDB01384	zf-C2H2	11	19482201	19524075	+
IGDB01435	zf-GATA	11	23122234	23124025	-
IGDB01438	ARID	11	23734724	23921879	-
IGDB01459	bHLH	11	25363720	25369127	-
IGDB01481	Homeobox	11	27461086	27464598	-
IGDB01501	Homeobox	12	454469	457404	+
IGDB01511	HMG	12	940349	950838	-
IGDB01541	Homeobox	12	2379681	2381228	+
IGDB01543	zf-MIZ	12	2434422	2451485	-
IGDB01561	Homeobox	12	3168875	3188090	+
IGDB01564	Homeobox	12	3523067	3526708	-
IGDB01623	zf-C2H2	12	9551714	9554255	-
IGDB01629	Homeobox	12	10005408	10009280	-
IGDB01643	Homeobox	12	10784151	10793174	-
IGDB01655	THAP	12	12223911	12225538	+
IGDB01666	zf-C2H2	12	13052020	13078621	-
IGDB01707	ZBTB	12	15293832	15295121	+
IGDB01745	THAP	12	18769751	18776101	+
IGDB01784	RXR-like	12	22894819	23017348	+
IGDB01796	SF-like	12	24979868	24985313	-
IGDB01797	Homeobox	12	24993862	25010453	-
IGDB01843	bHLH	12	28552419	28764894	+
IGDB01847	CUT	12	28897846	28933755	-
IGDB01860	TF_bZIP	12	30009045	30010322	-
IGDB01906	ESR-like	13	769848	775976	+
IGDB01929	THAP	13	2286769	2290390	-
IGDB01974	THAP	13	5449461	5451438	+
IGDB02114	CUT	13	13828124	13836051	-
IGDB02122	TF_bZIP	13	14078482	14085863	+
IGDB02126	Homeobox	13	14238050	14240106	-
IGDB02127	Homeobox	13	14240333	14254605	-
IGDB02130	RHD	13	14282204	14291128	+
IGDB02194	Homeobox	13	19830390	19831691	-
IGDB02250	THAP	13	25235835	25241060	-
IGDB02254	Fork_head	13	25544245	25545408	-
IGDB02312	bHLH	13	31699266	31700364	+
IGDB02313	Fork_head	13	31814610	31815767	-
IGDB02323	HMG	13	32674078	32675635	-
IGDB02324	T-box	13	32676579	32680772	-
IGDB02354	bHLH	14	2353899	2355879	+
IGDB02380	HMG	14	4040154	4118772	-
IGDB02403	Pou	14	7315063	7318328	+
IGDB02490	bHLH	14	12791262	12807907	-
IGDB02494	HMG	14	12928335	12963297	+
IGDB02517	zf-C2H2	14	14041702	14050148	+
IGDB02521	Homeobox	14	14126229	14127678	+
IGDB02575	T-box	14	17656205	17663218	-
IGDB02670	Pou	14	24869112	24883712	+
IGDB02722	ARID	14	29932428	29954936	-
IGDB02745	Runt	15	1330457	1337331	-
IGDB02747	MYB	15	1348464	1357545	-
IGDB02765	Homeobox	15	2815055	2816174	+
IGDB02776	Homeobox	15	3819142	3823539	+
IGDB02784	Homeobox	15	4851784	4859538	-
IGDB02787	Homeobox	15	5220181	5226549	-
IGDB02793	Homeobox	15	6586364	6589585	+
IGDB02834	zf-C2H2	15	10627133	10633360	+
IGDB02835	Fork_head	15	10690051	10696311	+
IGDB02843	zf-C2H2	15	11774515	11779909	+
IGDB02909	Homeobox	15	18754673	18756812	+
IGDB02912	Homeobox	15	18909594	18911851	-
IGDB02934	zf-MIZ	15	21340795	21402464	-
IGDB02951	Homeobox	15	22806114	22807936	-
IGDB02952	Homeobox	15	22809507	22812290	-
IGDB02974	Homeobox	15	23676593	23682904	-
IGDB03017	T-box	15	26409734	26418187	+
IGDB03054	bHLH	15	29839231	29839659	+
IGDB03058	bHLH	15	29954118	29959019	+
IGDB03065	zf-C2H2	15	30428281	30445353	+
IGDB03074	SAND	16	1012113	1029277	-
IGDB03076	zf-C2H2	16	1046178	1051537	-
IGDB03080	zf-C2H2	16	1799273	1832214	+
IGDB03081	zf-C2H2	16	2015051	2056271	-
IGDB03085	zf-C2H2	16	2744595	2757939	+
IGDB03165	Miscellaneous	16	9916270	9917193	+
IGDB03179	Homeobox	16	12012630	12018755	-
IGDB03180	Homeobox	16	12155893	12163250	-
IGDB03192	TF_bZIP	16	14019497	14026133	+
IGDB03261	bHLH	16	15982925	15983683	+
IGDB03264	TF_bZIP	16	16141190	16176035	-
IGDB03266	Homeobox	16	16228854	16231943	+
IGDB03267	Homeobox	16	16234020	16235538	+
IGDB03268	Homeobox	16	16239822	16244868	+
IGDB03269	Homeobox	16	16243227	16244868	+
IGDB03270	Homeobox	16	16248329	16249809	+
IGDB03342	zf-C2H2	16	19547816	19556332	+
IGDB03355	zf-C2H2	16	19908151	19917382	-
IGDB03372	zf-C2H2	16	20455675	20456313	-
IGDB03378	ETS	16	21043716	21102874	+
IGDB03379	zf-C2H2	16	21140047	21146372	-
IGDB03396	bHLH	16	22078233	22081242	+
IGDB03519	CUT	16	30120293	30180318	+
IGDB03529	Homeobox	16	31195332	31205470	-
IGDB03568	zf-C2H2	16	32118829	32122146	+
IGDB03600	TF_bZIP	17	421808	431936	-
IGDB03630	RHD	17	3264542	3283534	-
IGDB03663	HMG	17	5737777	5738451	+
IGDB03669	zf-C2H2	17	5945400	5947495	-
IGDB03727	zf-C2H2	17	10106810	10113779	-
IGDB03743	zf-C2H2	17	10909747	10913439	+
IGDB03744	zf-C2H2	17	10987144	10993813	-
IGDB03745	bHLH	17	11009894	11019558	-
IGDB03746	zf-C2H2	17	11014655	11022044	-
IGDB03747	zf-C2H2	17	11111179	11382711	-
IGDB03748	THAP	17	11288935	11292466	+
IGDB03750	zf-C2H2	17	11375208	11461017	+
IGDB03751	THAP	17	11389685	11392206	-
IGDB03752	zf-C2H2	17	11395122	11396276	-
IGDB03802	zf-C2H2	17	12137308	12147346	-
IGDB03815	zf-C2H2	17	12368671	12372698	-
IGDB03835	bHLH	17	13533217	13534542	-
IGDB03854	zf-C2H2	17	14798695	14812284	+
IGDB03859	Homeobox	17	15130579	15139939	-
IGDB03951	TF_bZIP	17	22377813	22387245	-
IGDB03952	CUT	17	22517441	22531085	+
IGDB03998	IRF	17	26480582	26490158	+
IGDB03999	IRF	17	26488851	26500154	+
IGDB04000	Fork_head	17	26527827	26528603	+
IGDB04001	Fork_head	17	26529725	26532534	+
IGDB04109	zf-C2H2	18	562349	566320	+
IGDB04111	zf-C2H2	18	589010	690222	-
IGDB04126	zf-C2H2	18	1128909	1137110	+
IGDB04177	zf-C2H2	18	3228225	3243484	-
IGDB04198	DACH	18	4516129	4620910	-
IGDB04268	DM	18	8179204	8181815	+
IGDB04293	MYB	18	12508055	12528894	-
IGDB04294	HPD	18	12578753	12592234	+
IGDB04301	TF_bZIP	18	12950412	12957756	-
IGDB04322	Homeobox	18	14262880	14264438	+
IGDB04354	zf-C2H2	18	17652955	17660855	+
IGDB04373	THAP	18	18294822	18296796	-
IGDB04459	THAP	18	23407876	23415018	+
IGDB04500	THAP	18	24297593	24297995	-
IGDB04547	MYB	18	26803419	26808955	-
IGDB04579	zf-BED	18	29004795	29013504	-
IGDB04594	ETS	18	29973395	29977350	-
IGDB04626	zf-C2H2	19	241917	270260	+
IGDB04641	zf-C2H2	19	780957	788553	+
IGDB04642	zf-C2H2	19	800734	810072	-
IGDB04647	zf-C2H2	19	1011628	1029001	-
IGDB04648	zf-C2H2	19	1018515	1023650	-
IGDB04653	COE	19	1110159	1149370	-
IGDB04670	CSD	19	2111736	2117309	+
IGDB04684	zf-LITAF-like	19	2842751	2848201	-
IGDB04685	Fork_head	19	2887862	2892359	+
IGDB04697	Fork_head	19	3283714	3285870	-
IGDB04700	bHLH	19	3619457	3620020	-
IGDB04747	THAP	19	7106965	7111737	+
IGDB04756	T-box	19	7717877	7723236	+
IGDB04805	Tub	19	9320835	9322967	-
IGDB04807	zf-C2H2	19	9360695	9362656	+
IGDB04841	PAX	19	11116854	11144781	-
IGDB04847	Homeobox	19	11410844	11411889	+
IGDB04932	THR-like	19	18282316	18333498	-
IGDB04939	T-box	19	18983831	19000442	+
IGDB04945	Homeobox	19	19124812	19129982	-
IGDB04946	Homeobox	19	19125842	19127383	-
IGDB04947	Homeobox	19	19135285	19139504	-
IGDB04948	Homeobox	19	19140639	19144230	-
IGDB05032	zf-C2H2	2	473040	525230	+
IGDB05055	Runt	2	1346310	1369639	+
IGDB05068	NGFIB-like	2	2066049	2072545	-
IGDB05083	bHLH	2	3814168	3852448	+
IGDB05090	zf-C2H2	2	4309472	4312955	+
IGDB05094	zf-C2H2	2	4555726	4563366	+
IGDB05097	zf-C2H2	2	4630605	4632092	+
IGDB05100	zf-C2H2	2	4826551	4831438	+
IGDB05101	zf-C2H2	2	4847778	4851864	-
IGDB05104	zf-C2H2	2	4959006	4960241	-
IGDB05105	zf-C2H2	2	5008516	5324046	+
IGDB05108	HMG	2	5078105	5106556	+
IGDB05112	HMG	2	5178964	5180535	+
IGDB05117	zf-C2H2	2	5263881	5265269	-
IGDB05119	zf-C2H2	2	5437837	5689233	-
IGDB05120	zf-C2H2	2	5519329	5520738	+
IGDB05121	zf-C2H2	2	5539787	5564291	+
IGDB05122	zf-C2H2	2	5591410	5597710	+
IGDB05123	zf-C2H2	2	5730667	5952931	-
IGDB05124	zf-C2H2	2	5774736	5929187	+
IGDB05128	zf-BED	2	6014183	6016710	-
IGDB05132	zf-C2H2	2	6349224	6397251	-
IGDB05135	THAP	2	6522722	6527165	-
IGDB05140	zf-C2H2	2	6863331	6864518	-
IGDB05142	zf-C2H2	2	7000025	7001683	-
IGDB05144	zf-C2H2	2	7061989	7065174	+
IGDB05146	zf-C2H2	2	7189279	7570736	-
IGDB05151	zf-C2H2	2	7908535	7913561	-
IGDB05154	zf-C2H2	2	8030021	8051781	-
IGDB05158	zf-C2H2	2	8428780	8430099	+
IGDB05163	zf-C2H2	2	8674163	8720484	-
IGDB05164	zf-C2H2	2	8699822	8704747	+
IGDB05165	zf-C2H2	2	8787304	9099504	+
IGDB05167	zf-C2H2	2	8973885	9045324	-
IGDB05168	zf-C2H2	2	9043486	9286651	-
IGDB05173	zf-C2H2	2	9536848	9544648	+
IGDB05192	T-box	2	10309683	10320694	-
IGDB05193	zf-C2H2	2	10399658	10404728	+
IGDB05194	zf-C2H2	2	10535421	10608834	-
IGDB05196	Homeobox	2	10938456	10941636	-
IGDB05217	zf-C2H2	2	11815178	12000802	+
IGDB05221	zf-C2H2	2	12141322	12147869	-
IGDB05232	HPD	2	13608414	13647209	+
IGDB05252	CSRNP_N	2	15962010	15971174	-
IGDB05285	Homeobox	2	18271317	18273407	-
IGDB05316	HMG	2	22934737	22937482	-
IGDB05351	CUT	2	24595712	24615672	-
IGDB05364	LRRFIP	2	25022109	25033715	-
IGDB05394	THAP	20	1804189	1806170	-
IGDB05395	GCM	20	1844855	1854790	-
IGDB05400	zf-C2H2	20	2067055	2073174	+
IGDB05415	THAP	20	2431127	2434643	+
IGDB05459	Homeobox	20	8207465	8237699	+
IGDB05494	TF_bZIP	20	12326958	12330283	-
IGDB05528	Homeobox	20	15111322	15163442	+
IGDB05543	MYB	20	16237034	16244676	-
IGDB05547	bHLH	20	16376920	16378221	+
IGDB05552	bHLH	20	17024742	17025493	+
IGDB05560	Homeobox	20	17468856	17474106	-
IGDB05579	zf-C2H2	20	18011648	18033736	+
IGDB05591	Homeobox	20	19643259	19645568	-
IGDB05603	HMG	20	20605386	20606909	+
IGDB05604	HMG	20	20637547	20639712	+
IGDB05620	THAP	20	22673459	22676981	+
IGDB05668	zf-BED	21	546436	551984	-
IGDB05672	zf-C2H2	21	812478	836021	+
IGDB05760	bHLH	21	5178495	5179301	+
IGDB05761	bHLH	21	5200765	5203853	+
IGDB05791	zf-C2H2	21	8096691	8101552	+
IGDB05804	Miscellaneous	21	9524750	9526505	-
IGDB05807	HMG	21	9831740	9832777	-
IGDB05808	AF-4	21	9962159	9988232	+
IGDB05814	Pou	21	10232014	10233258	+
IGDB05881	zf-C2H2	21	16390926	16399247	+
IGDB05911	Pou	21	17860837	17936329	-
IGDB05917	zf-C2H2	21	18343610	18351294	+
IGDB05919	zf-C2H2	21	18955554	18976623	-
IGDB05964	Homeobox	21	22027714	22031897	+
IGDB05970	Homeobox	21	22509863	22511736	-
IGDB05971	Homeobox	21	22526812	22528192	+
IGDB05972	Homeobox	21	22531227	22539963	+
IGDB06019	bHLH	21	26324791	26325587	-
IGDB06020	bHLH	21	26336642	26343600	-
IGDB06059	THAP	21	28468358	28469709	-
IGDB06061	LRRFIP	21	28506129	28538612	+
IGDB06068	Homeobox	21	28760997	28766425	-
IGDB06086	ETS	21	30523466	30528336	-
IGDB06141	PAX	22	833566	838961	-
IGDB06142	Homeobox	22	840098	856625	+
IGDB06144	Homeobox	22	862137	866951	+
IGDB06151	zf-C2H2	22	1106188	1111656	+
IGDB06152	zf-C2H2	22	1109415	1115182	+
IGDB06201	Fork_head	22	2254869	2257959	-
IGDB06206	T-box	22	2315485	2319110	+
IGDB06219	Fork_head	22	2902162	2904564	-
IGDB06230	Homeobox	22	4229618	4233504	-
IGDB06238	TF_bZIP	22	4455310	4477262	-
IGDB06307	Homeobox	22	12086645	12090886	-
IGDB06338	TF_bZIP	22	13244301	13249298	+
IGDB06340	ESR-like	22	13422918	13462251	+
IGDB06341	HPD	22	13496277	13504862	-
IGDB06346	Homeobox	22	13737855	13743920	+
IGDB06383	ARID	22	15214635	15434243	-
IGDB06392	PAX	22	16415563	16418811	-
IGDB06393	Homeobox	22	16484928	16487976	+
IGDB06404	bHLH	22	17344295	17345071	+
IGDB06439	zf-C2HC	22	20448659	20575586	-
IGDB06453	Fork_head	22	21995009	21997877	+
IGDB06464	ESR-like	22	23120462	23202018	+
IGDB06476	bHLH	22	24094799	24319082	+
IGDB06504	Homeobox	22	25801834	25807187	-
IGDB06505	Homeobox	22	25806357	25812957	-
IGDB06585	THAP	23	4711902	4714093	-
IGDB06605	bHLH	23	6543231	6547824	+
IGDB06628	zf-C2H2	23	11023536	11028022	+
IGDB06691	ETS	23	17605702	17606997	-
IGDB06692	ETS	23	17605702	17609693	-
IGDB06706	bHLH	23	19172921	19175411	-
IGDB06707	bHLH	23	19181390	19185318	-
IGDB06730	MYB	23	22487647	22504282	+
IGDB06772	THAP	23	24125515	24130429	-
IGDB06793	bHLH	24	403695	414115	+
IGDB06806	RFX	24	730208	739062	-
IGDB06822	TF_bZIP	24	1345564	1349259	+
IGDB06824	HPD	24	1520359	1528495	-
IGDB06826	bHLH	24	1574321	1583776	-
IGDB06853	Runt	24	3137495	3184228	+
IGDB06881	Homeobox	24	6074019	6078206	-
IGDB06898	bHLH	24	6780062	6791838	-
IGDB06910	Homeobox	24	7726489	7728111	-
IGDB06931	Tub	24	9087961	9114239	-
IGDB06933	bHLH	24	9126099	9126506	-
IGDB06956	Homeobox	24	10512978	10528681	+
IGDB07020	bHLH	24	14150775	14155476	-
IGDB07055	Homeobox	24	16185437	16187174	+
IGDB07056	Homeobox	24	16192470	16196976	+
IGDB07069	Homeobox	24	17111627	17120967	-
IGDB07130	zf-C2H2	24	22565108	22614827	-
IGDB07145	TF_bZIP	24	23390703	23397876	+
IGDB07167	bHLH	3	792773	797914	+
IGDB07179	HMG	3	1308770	1346688	-
IGDB07195	RXR-like	3	1961332	1965158	+
IGDB07200	RXR-like	3	2079011	2082405	-
IGDB07231	zf-C2H2	3	4519847	4525838	-
IGDB07262	Homeobox	3	6415663	6422716	-
IGDB07281	zf-C2H2	3	9538825	9579694	+
IGDB07283	THAP	3	9919303	9924620	-
IGDB07328	Pou	3	14872235	14875475	+
IGDB07351	ETS	3	18157155	18165578	-
IGDB07364	Homeobox	3	18924437	18942226	-
IGDB07366	HMG	3	19062484	19183485	+
IGDB07385	RHD	3	20394256	20424392	+
IGDB07411	IRF	3	22284812	22287989	-
IGDB07444	ESR-like	3	25248496	25307694	-
IGDB07489	bHLH	3	32288203	32289343	+
IGDB07490	bHLH	3	32294177	32295275	+
IGDB07498	SRF	3	32856523	32902912	-
IGDB07524	zf-C2H2	3	35754068	35790497	+
IGDB07525	zf-C2H2	3	35937664	36091452	-
IGDB07542	THAP	3	37161835	37167608	-
IGDB07549	Fork_head	3	37412131	37413051	+
IGDB07560	zf-C2H2	3	38040751	38058892	-
IGDB07576	Homeobox	4	535109	536854	-
IGDB07595	zf-GATA	4	2194056	2221831	-
IGDB07636	Homeobox	4	5056642	5059833	-
IGDB07637	zf-C2H2	4	5172462	5190225	-
IGDB07661	zf-C2H2	4	6440125	6441222	+
IGDB07664	zf-C2H2	4	6621838	6697608	-
IGDB07667	Homeobox	4	6793766	6801619	+
IGDB07691	MBD	4	7750462	7756735	-
IGDB07694	zf-C2H2	4	7798326	7806163	-
IGDB07695	Fork_head	4	7835037	7837130	+
IGDB07696	CUT	4	7862678	7878384	+
IGDB07698	TF_bZIP	4	7905824	7912103	+
IGDB07779	Homeobox	4	14751403	14754504	-
IGDB07799	DM	4	16778965	16786308	+
IGDB07811	zf-C2H2	4	17616154	17617881	+
IGDB07838	IRF	4	21244129	21249830	-
IGDB07875	zf-C2H2	4	24102762	24105850	+
IGDB07882	zf-C2H2	4	24588224	24590372	-
IGDB07883	zf-C2H2	4	24828312	24830784	-
IGDB07932	Homeobox	4	29528840	29538534	+
IGDB07935	Fork_head	4	29827600	29828799	-
IGDB07970	Homeobox	4	32190018	32198646	+
IGDB07971	Homeobox	4	32351418	32359411	-
IGDB08086	bHLH	5	6661971	6684715	-
IGDB08109	zf-C2H2	5	8605912	8617909	-
IGDB08120	zf-C2H2	5	10442984	10447230	-
IGDB08123	zf-C2H2	5	10479246	10483042	-
IGDB08125	zf-C2H2	5	10718926	10742829	-
IGDB08126	zf-C2H2	5	10748726	10808572	-
IGDB08136	HMG	5	11792651	11925608	+
IGDB08143	Tub	5	12961193	12964286	-
IGDB08150	RHD	5	13726775	13736041	+
IGDB08160	ETS	5	14623461	14633786	-
IGDB08205	zf-C2H2	5	18170497	18179878	+
IGDB08222	zf-C2H2	5	19992012	19999027	+
IGDB08257	zf-C2H2	5	24110138	24119072	-
IGDB08272	Homeobox	5	25106005	25109049	+
IGDB08278	TF_bZIP	5	26320260	26321222	-
IGDB08305	zf-C2H2	5	27306181	27328045	+
IGDB08330	bHLH	5	28570352	28571732	-
IGDB08406	CSL	5	33090955	33114751	+
IGDB08424	Homeobox	6	2002023	2005673	-
IGDB08490	PAX	6	6791263	6819440	+
IGDB08497	zf-C2H2	6	7436407	7446988	-
IGDB08544	Homeobox	6	12385176	12393462	-
IGDB08624	RXR-like	6	16701264	16706050	+
IGDB08633	Homeobox	6	17588286	17590594	+
IGDB08670	TF_bZIP	6	20720515	20767849	+
IGDB08721	zf-C2H2	6	25693557	25774590	-
IGDB08728	Fork_head	6	26290529	26292282	+
IGDB08732	Homeobox	6	26686841	26695112	-
IGDB08740	Homeobox	6	27117435	27127347	+
IGDB08761	E2F	6	28145320	28156549	-
IGDB08768	Homeobox	6	29435182	29439103	-
IGDB08778	zf-C2H2	6	30498151	30500225	+
IGDB08805	TF_bZIP	6	31650974	31659019	+
IGDB08806	TF_bZIP	6	31653808	31663478	+
IGDB08807	TF_bZIP	6	31654171	31660058	+
IGDB08857	THR-like	7	2100500	2167316	+
IGDB08859	bHLH	7	2255910	2256554	-
IGDB08885	zf-C2H2	7	5073486	5124090	+
IGDB08886	zf-GATA	7	5255047	5277611	-
IGDB08918	bHLH	7	7659430	7660773	-
IGDB08920	bHLH	7	7871802	7873282	+
IGDB08921	bHLH	7	7884167	7887880	+
IGDB08924	bHLH	7	7990618	7992126	-
IGDB08949	Fork_head	7	10048626	10049417	-
IGDB08953	SAND	7	10209350	10265095	-
IGDB08954	zf-GATA	7	10325064	10411124	-
IGDB08960	Homeobox	7	10853658	10858058	+
IGDB08997	THR-like	7	12573894	12583304	-
IGDB08998	Homeobox	7	12720280	12722594	+
IGDB08999	Homeobox	7	12727885	12733637	+
IGDB09000	Homeobox	7	12744269	12746097	+
IGDB09001	Homeobox	7	12757944	12762045	+
IGDB09002	Homeobox	7	12777313	12780369	+
IGDB09004	TF_bZIP	7	12840304	12846534	-
IGDB09013	ETS	7	13457118	13458851	-
IGDB09035	bHLH	7	15156405	15157079	+
IGDB09061	MBD	7	17192890	17200045	+
IGDB09120	bHLH	7	21988464	21989950	+
IGDB09133	Pou	7	22365769	22379360	+
IGDB09156	Homeobox	7	24413326	24414858	+
IGDB09196	HMG	7	27205747	27212211	-
IGDB09200	THAP	7	27721196	27724993	-
IGDB09228	MBD	7	30181275	30193257	-
IGDB09240	Fork_head	7	30852207	30858168	-
IGDB09266	PAX	7	32511195	32551763	+
IGDB09294	bHLH	7	34417951	34443054	-
IGDB09311	zf-C2H2	8	373128	379718	+
IGDB09313	zf-C2H2	8	391088	397155	+
IGDB09326	zf-C2H2	8	758055	758664	-
IGDB09414	zf-C2H2	8	5500220	5508039	-
IGDB09429	bHLH	8	6750928	6758539	-
IGDB09431	Homeobox	8	7373383	7374366	+
IGDB09438	zf-LITAF-like	8	8133676	8134078	-
IGDB09441	zf-LITAF-like	8	8139994	8147427	-
IGDB09459	SF-like	8	8723704	8727578	+
IGDB09470	Homeobox	8	9032034	9065250	-
IGDB09507	zf-C2H2	8	11197601	11220466	-
IGDB09520	zf-C2H2	8	12249723	12257780	-
IGDB09531	THAP	8	12506309	12511004	-
IGDB09651	SAND	8	18479485	18516682	-
IGDB09652	SAND	8	18529387	18543858	-
IGDB09697	Fork_head	8	21115231	21116184	-
IGDB09710	zf-C2H2	8	21900980	21903418	+
IGDB09723	zf-C2H2	8	22651498	22657928	+
IGDB09736	THR-like	8	23615301	23636765	-
IGDB09748	Homeobox	8	24183475	24191165	+
IGDB09749	Homeobox	8	24207423	24218793	+
IGDB09750	Homeobox	8	24222494	24224820	+
IGDB09751	Homeobox	8	24294347	24297141	+
IGDB09752	TF_bZIP	8	24434361	24443130	-
IGDB09787	Homeobox	8	25706150	25715736	+
IGDB09822	DM	9	1154532	1163506	-
IGDB09823	DM	9	1173088	1176083	-
IGDB09824	DM	9	1179951	1213369	-
IGDB09838	bHLH	9	1964500	1964838	-
IGDB09840	Homeobox	9	2004120	2011448	-
IGDB09879	zf-C2H2	9	4894899	4901851	+
IGDB09918	Homeobox	9	6911244	6915575	-
IGDB09927	zf-C2H2	9	7756465	7760298	-
IGDB09954	Fork_head	9	11869349	11870308	-
IGDB10023	zf-C2H2	9	16927956	16932645	+
IGDB10033	Homeobox	9	17376870	17378784	+
IGDB10036	ARID	9	17438904	17445827	-
IGDB10067	zf-C2H2	9	19491262	19504229	+
IGDB10127	CUT	9	25519742	25607792	+
IGDB10159	GCNF-like	9	27801438	27896016	-
IGDB10167	Homeobox	9	28241730	28252917	-
IGDB10220	zf-MIZ	9	30477252	30490007	+
IGDB10222	ARID	9	30497993	30518388	-
IGDB10294	DM	000829F	22422	59598	+
IGDB10332	Homeobox	000281F	808927	811106	-
IGDB10335	zf-C2H2	000316F	281528	319236	-
IGDB10336	zf-C2H2	000316F	472452	483446	-
IGDB10338	zf-C2H2	000316F	548497	645776	-
IGDB10339	zf-C2H2	000316F	575983	888716	-
IGDB10341	zf-C2H2	000316F	659186	808309	-
IGDB10342	zf-C2H2	000316F	696166	849586	-
IGDB10343	zf-C2H2	000316F	769701	778787	+
IGDB10345	zf-C2H2	000325F	48357	55483	+
IGDB10349	zf-C2H2	000325F	164884	196740	-
IGDB10350	zf-C2H2	000325F	315369	337174	-
IGDB10357	zf-C2H2	000377F	578251	594790	-
IGDB10358	zf-C2H2	000377F	616997	637245	+
IGDB10361	zf-C2HC	000399F	320294	355117	-
IGDB10367	zf-C2H2	000408F	5645	16033	+
IGDB10369	zf-C2H2	000408F	186348	242496	-
IGDB10370	zf-C2H2	000408F	186829	206521	-
IGDB10372	zf-C2H2	000408F	357149	371671	+
IGDB10381	zf-C2H2	000437F	134237	147108	+
IGDB10386	zf-C2H2	000437F	471361	474420	-
IGDB10387	zf-C2H2	000437F	526719	547007	-
IGDB10390	zf-C2H2	000442F	20184	101370	-
IGDB10392	zf-C2H2	000442F	109137	135046	+
IGDB10395	zf-C2H2	000442F	275411	278611	-
IGDB10396	zf-C2H2	000446F	25801	37386	+
IGDB10398	zf-C2H2	000446F	214132	235221	+
IGDB10401	zf-C2H2	000446F	424041	441469	+
IGDB10407	HMG	000450F	245811	282738	-
IGDB10411	zf-C2H2	000458F	3468	45416	+
IGDB10417	zf-C2H2	000458F	351773	369855	+
IGDB10418	zf-C2H2	000464F	36968	46328	+
IGDB10429	zf-C2H2	000476F	284887	293853	+
IGDB10437	zf-C2H2	000480F	12037	18010	+
IGDB10440	zf-C2H2	000480F	128343	138406	+
IGDB10442	zf-C2H2	000480F	371451	392691	-
IGDB10445	zf-C2H2	000486F	199429	216625	+
IGDB10451	zf-C2H2	000511F	360086	377353	+
IGDB10452	zf-C2H2	000511F	403229	407190	-
IGDB10455	zf-C2H2	000517F	385341	408199	+
IGDB10466	zf-C2H2	000523F	51401	144014	-
IGDB10468	zf-C2H2	000523F	218261	236405	+
IGDB10470	zf-C2H2	000523F	246183	257088	+
IGDB10471	zf-C2H2	000523F	300876	315883	-
IGDB10476	zf-C2H2	000527F	181176	214403	+
IGDB10496	zf-C2H2	000530F	273144	286546	-
IGDB10497	zf-C2H2	000530F	290906	313706	+
IGDB10498	zf-C2H2	000530F	337241	363776	-
IGDB10501	zf-C2H2	000534F	36398	45804	+
IGDB10504	zf-C2H2	000534F	267120	270646	+
IGDB10507	bHLH	000542F	111690	113979	+
IGDB10523	zf-C2H2	000551F	106275	149918	+
IGDB10528	zf-C2H2	000575F	55535	66885	-
IGDB10529	zf-C2H2	000575F	78467	137423	-
IGDB10532	zf-C2H2	000575F	148985	279156	+
IGDB10533	zf-C2H2	000575F	166617	178700	+
IGDB10538	zf-C2H2	000575F	301750	312837	+
IGDB10548	bHLH	000576F	153688	156366	+
IGDB10550	zf-C2H2	000580F	97550	109115	-
IGDB10551	zf-C2H2	000580F	144692	166235	+
IGDB10553	zf-C2H2	000580F	288698	318306	-
IGDB10556	zf-C2H2	000583F	267778	281333	-
IGDB10568	ETS	000594F	258194	266429	-
IGDB10578	zf-C2H2	000602F	227916	230665	+
IGDB10579	zf-C2H2	000609F	145597	161303	-
IGDB10580	zf-C2H2	000609F	171171	286303	-
IGDB10588	zf-C2H2	000620F	94747	107351	-
IGDB10589	zf-C2H2	000620F	117343	142948	-
IGDB10590	zf-C2H2	000624F	54216	58704	-
IGDB10591	zf-C2H2	000624F	63195	102351	+
IGDB10592	zf-C2H2	000624F	89113	115169	+
IGDB10593	zf-C2H2	000624F	122620	141024	+
IGDB10595	zf-C2H2	000624F	253738	260565	-
IGDB10599	zf-C2H2	000631F	111104	122031	-
IGDB10605	zf-C2H2	000633F	193298	207643	-
IGDB10607	zf-C2H2	000633F	246406	265437	+
IGDB10616	zf-C2H2	000645F	162380	169995	-
IGDB10618	zf-C2H2	000645F	242032	253084	+
IGDB10621	zf-C2H2	000652F	16078	40960	+
IGDB10626	zf-C2H2	000656F	15370	25378	+
IGDB10628	zf-C2H2	000656F	35347	53597	+
IGDB10632	zf-C2H2	000663F	117001	129961	+
IGDB10634	zf-C2H2	000663F	137866	152264	-
IGDB10639	zf-C2H2	000666F	24107	40188	+
IGDB10641	zf-C2H2	000666F	48702	98385	-
IGDB10642	zf-C2H2	000666F	115913	135627	-
IGDB10660	HMG	000686F	35785	40157	-
IGDB10662	MYB	000689F	46016	65798	+
IGDB10679	zf-C2H2	000708F	86569	107594	-
IGDB10682	CUT	000710F	39495	84788	-
IGDB10688	zf-C2H2	000719F	60742	78404	-
IGDB10689	zf-C2H2	000719F	130327	151345	+
IGDB10692	zf-C2H2	000724F	40426	99890	-
IGDB10693	zf-C2H2	000724F	53380	65464	+
IGDB10709	zf-C2H2	000743F	120840	133001	-
IGDB10714	zf-C2H2	000752F	51225	108149	+
IGDB10724	zf-C2H2	000768F	36546	49865	-
IGDB10725	zf-C2H2	000768F	58480	97025	-
IGDB10740	zf-C2H2	000779F	52418	55958	+
IGDB10748	HMG	000797F	102016	104667	-
IGDB10765	zf-C2H2	000813F	77626	87105	-
IGDB10767	zf-C2H2	000816F	40547	42499	-
IGDB10769	zf-C2H2	000816F	78649	83184	+
IGDB10772	zf-C2H2	000822F	75464	96928	-
IGDB10777	zf-C2H2	000830F	29111	54139	-
IGDB10786	zf-C2H2	000838F	19359	48195	-
IGDB10790	zf-C2H2	000850F	24628	54992	-
IGDB10814	zf-C2H2	000907F	53786	66903	-
IGDB10816	zf-C2H2	000910F	27010	28898	-
IGDB10818	TF_bZIP	000919F	10754	22856	-
IGDB10824	zf-C2H2	000947F	1115	7980	+
IGDB10836	Pou	000982F	34959	37074	+
IGDB10838	bHLH	000985F	1684	19447	-
IGDB10866	zf-C2H2	001093F	2014	13262	+
IGDB10890	SRF	1	165528	181502	-
IGDB10910	HMG	1	910724	913750	-
IGDB10946	zf-C2H2	1	1811845	1825679	-
IGDB10995	MYB	1	3639983	3655387	-
IGDB11045	ETS	1	5670042	5677078	+
IGDB11074	HMG	1	8305210	8327155	-
IGDB11082	TF_Otx	1	8640282	8645795	+
IGDB11123	MH1	1	10178615	10210940	+
IGDB11130	bHLH	1	10320085	10325167	-
IGDB11164	bHLH	1	11180158	11195579	-
IGDB11173	CSL	1	11963544	11975847	+
IGDB11191	PAX	1	12718431	12766548	-
IGDB11196	zf-C2H2	1	12920659	13032800	+
IGDB11214	HTH	1	13372871	13390705	+
IGDB11222	zf-C2H2	1	13553585	13562275	+
IGDB11256	bHLH	1	15516930	15539500	+
IGDB11273	HMG	1	16119687	16159453	-
IGDB11292	Fork_head	1	16931106	16933029	-
IGDB11295	zf-C2H2	1	17199054	17276960	+
IGDB11311	MH1	1	18355224	18375171	+
IGDB11315	zf-C2H2	1	18410251	18470547	-
IGDB11322	ESR-like	1	18803148	18883749	-
IGDB11366	zf-LITAF-like	1	21045838	21049775	+
IGDB11382	zf-C2H2	1	21944241	21954269	+
IGDB11386	Fork_head	1	21999185	22012625	+
IGDB11391	zf-LITAF-like	1	22088138	22089969	+
IGDB11429	zf-C2H2	1	23729299	23738739	+
IGDB11432	Homeobox	1	23885049	23889727	-
IGDB11449	TF_bZIP	1	24635016	24638923	-
IGDB11472	zf-C2H2	1	27132944	27135212	-
IGDB11480	bHLH	1	27517865	27535386	+
IGDB11497	zf-LITAF-like	1	28423312	28429466	-
IGDB11499	RFX	1	28659027	28675668	+
IGDB11547	zf-C2H2	1	29834775	29865637	+
IGDB11601	zf-C2H2	1	32864820	32878567	-
IGDB11602	zf-C2H2	1	32886620	32894348	+
IGDB11603	zf-C2H2	1	32896548	32902370	+
IGDB11618	TF_bZIP	1	35381670	35384166	+
IGDB11626	TF_bZIP	1	35562175	35569838	-
IGDB11640	bHLH	1	35991997	36002842	+
IGDB11667	Homeobox	10	134517	137472	-
IGDB11687	zf-C2H2	10	3194995	3205173	+
IGDB11709	Homeobox	10	4086879	4094312	+
IGDB11717	bHLH	10	4536520	4543527	+
IGDB11749	Homeobox	10	6680463	6682940	+
IGDB11755	zf-C2H2	10	7145770	7150612	-
IGDB11780	ETS	10	9655208	9696462	-
IGDB11815	zf-C2H2	10	10895159	10899263	-
IGDB11816	zf-C2H2	10	10905528	10910460	+
IGDB11825	HMG	10	11175393	11183917	-
IGDB11836	Homeobox	10	11448609	11451792	+
IGDB11845	TF_bZIP	10	11656803	11659996	-
IGDB11847	Fork_head	10	11670764	11674782	+
IGDB11852	Fork_head	10	11759988	11766683	+
IGDB11891	TSC22	10	12849197	12882896	+
IGDB11909	HMG	10	13992659	14007219	-
IGDB11924	zf-C2H2	10	14242937	14248037	-
IGDB11926	zf-C2H2	10	14258088	14262151	+
IGDB11927	zf-C2H2	10	14262225	14265199	+
IGDB11968	Homeobox	10	16243152	16251357	-
IGDB11971	HMG	10	16297825	16308293	-
IGDB11998	zf-C2H2	10	17273562	17276914	+
IGDB12018	ESR-like	10	17646106	17668291	-
IGDB12034	zf-C2H2	10	18247326	18254029	+
IGDB12056	bHLH	10	19110765	19113423	-
IGDB12087	Homeobox	10	20505858	20507491	+
IGDB12097	COE	10	20632340	20686560	-
IGDB12118	ESR-like	10	22169303	22177242	-
IGDB12124	Homeobox	10	22738034	22746555	+
IGDB12131	IRF	10	24513568	24524434	-
IGDB12147	AF-4	10	25392651	25593136	+
IGDB12157	MH1	10	25742932	25754525	-
IGDB12198	Pou	10	27187374	27188650	+
IGDB12207	Homeobox	10	27438048	27443112	-
IGDB12249	zf-C2H2	11	228243	238945	-
IGDB12267	zf-C2H2	11	730371	733236	-
IGDB12308	Homeobox	11	2681383	2827462	+
IGDB12327	RFX	11	4408656	4417187	-
IGDB12337	zf-C2H2	11	4599053	4602967	+
IGDB12338	zf-C2H2	11	4603467	4608201	+
IGDB12339	zf-C2H2	11	4613201	4618189	+
IGDB12341	zf-C2H2	11	4628515	4631916	+
IGDB12342	zf-C2H2	11	4635382	4645326	+
IGDB12346	MYB	11	4710962	4726021	+
IGDB12348	NCU-G1	11	4740162	4744315	+
IGDB12353	HSF	11	4829704	4842245	+
IGDB12390	T-box	11	6420332	6424042	+
IGDB12416	zf-C2H2	11	7380014	7409237	+
IGDB12435	MYB	11	9430223	9442148	-
IGDB12444	zf-C2H2	11	9689038	9698465	-
IGDB12445	zf-C2H2	11	9724316	9726025	+
IGDB12473	CUT	11	10933806	10947838	+
IGDB12482	TF_bZIP	11	11203442	11215661	+
IGDB12485	Homeobox	11	11315674	11317815	-
IGDB12486	Homeobox	11	11326341	11347797	-
IGDB12487	Homeobox	11	11359831	11361873	-
IGDB12488	Homeobox	11	11364923	11367554	-
IGDB12489	Homeobox	11	11371247	11373939	-
IGDB12491	zf-C2H2	11	11469478	11483506	-
IGDB12538	zf-C2H2	11	14815059	14822764	+
IGDB12559	RXR-like	11	15680349	15704934	+
IGDB12572	zf-C2H2	11	16024056	16035551	-
IGDB12579	Pou	11	16622144	16682160	+
IGDB12580	ETS	11	16714273	16744562	+
IGDB12633	SAND	11	18223851	18230909	+
IGDB12637	zf-C2H2	11	18712681	18742678	+
IGDB12639	THR-like	11	18933155	19015572	+
IGDB12649	zf-C2H2	11	19171562	19178375	-
IGDB12654	bHLH	11	19247780	19257213	+
IGDB12665	zf-C2H2	11	19480015	19510018	+
IGDB12682	AP-2	11	19987838	19997632	+
IGDB12689	zf-C2H2	11	20514162	20521751	-
IGDB12720	zf-GATA	11	21636297	21664684	+
IGDB12732	Homeobox	11	21872492	21884378	-
IGDB12744	CP2	11	22064307	22082157	-
IGDB12757	NF-YC	11	22274071	22292734	+
IGDB12800	bHLH	11	23313962	23316221	-
IGDB12832	zf-C2H2	11	25385153	25392543	+
IGDB12846	T-box	11	25849208	25851630	-
IGDB12856	Homeobox	11	26210887	26220405	+
IGDB12865	E2F	11	26862766	26869957	+
IGDB12866	HMG	11	27126875	27130198	+
IGDB12869	Homeobox	11	27497245	27500373	-
IGDB12937	Homeobox	12	1827177	1829419	-
IGDB12948	SRF	12	1977687	2007831	+
IGDB13011	ARID	12	5064543	5068041	+
IGDB13022	Fork_head	12	5473416	5475232	-
IGDB13105	zf-C2H2	12	9246252	9270193	+
IGDB13106	zf-C2H2	12	9273272	9287120	+
IGDB13108	zf-C2H2	12	9298261	9301931	-
IGDB13116	MH1	12	9747587	9762725	-
IGDB13124	zf-C2H2	12	9987153	9998588	-
IGDB13132	AF-4	12	10428433	10450624	-
IGDB13162	zf-C2H2	12	12256639	12260286	+
IGDB13169	PAX	12	12367172	12376896	-
IGDB13174	T-box	12	12686889	12693920	+
IGDB13175	T-box	12	12712197	12728194	+
IGDB13191	MH1	12	13025607	13033344	+
IGDB13193	RFX	12	13037450	13049531	-
IGDB13275	Homeobox	12	15159131	15173042	-
IGDB13298	Pou	12	15942154	15945347	+
IGDB13323	T-box	12	17515749	17519179	-
IGDB13343	MH1	12	19391216	19410826	+
IGDB13376	Homeobox	12	24156625	24165772	+
IGDB13400	zf-C2H2	12	25337306	25340433	-
IGDB13440	zf-C2H2	12	27416946	27420309	+
IGDB13449	TF_bZIP	12	27597990	27601411	-
IGDB13489	MBD	12	29871663	29898405	-
IGDB13492	THAP	12	29951782	29955830	+
IGDB13539	zf-CCCH	13	2412530	2415329	-
IGDB13565	THAP	13	3351214	3354412	+
IGDB13575	Fork_head	13	3719530	3723945	-
IGDB13593	zf-C2H2	13	4235194	4239672	-
IGDB13594	zf-C2H2	13	4240232	4244641	-
IGDB13622	zf-C2H2	13	5171827	5185620	+
IGDB13635	ESR-like	13	6453899	6460643	-
IGDB13656	Fork_head	13	7350718	7379472	-
IGDB13663	TF_bZIP	13	7818003	7824585	+
IGDB13679	HMG	13	8849057	8851532	+
IGDB13698	MYB	13	10134482	10147769	+
IGDB13702	Homeobox	13	10213249	10227042	-
IGDB13716	zf-C2H2	13	11018290	11028491	-
IGDB13726	zf-C2H2	13	11436601	11455928	-
IGDB13744	THAP	13	12337773	12341635	+
IGDB13746	zf-C2H2	13	12357769	12361723	+
IGDB13771	zf-C2H2	13	14033794	14043731	+
IGDB13800	Homeobox	13	15311728	15318276	-
IGDB13831	bHLH	13	16763861	16776827	-
IGDB13842	Fork_head	13	16982619	16994303	+
IGDB13861	Homeobox	13	17898086	17909036	+
IGDB13869	TF_Otx	13	18008680	18011864	-
IGDB13885	PAX	13	18517828	18540354	-
IGDB13953	Homeobox	13	21861087	21865125	-
IGDB13972	ZBTB	13	22642307	22655725	-
IGDB13979	zf-C2H2	13	23065822	23077191	-
IGDB14023	Homeobox	13	25954818	25966892	+
IGDB14029	ETS	13	26566617	26588213	-
IGDB14030	ETS	13	26627877	26656266	+
IGDB14054	zf-C2H2	13	27971947	28055320	-
IGDB14056	zf-C2H2	13	28063180	28068668	-
IGDB14078	Homeobox	13	29362455	29370314	+
IGDB14080	T-box	13	29909090	29916774	+
IGDB14081	T-box	13	29936295	29970688	+
IGDB14094	zf-C2H2	13	30448401	30453664	-
IGDB14097	zf-C2H2	13	30515856	30543498	-
IGDB14110	zf-C2H2	13	31037946	31061369	+
IGDB14111	TF_bZIP	13	31224265	31227442	-
IGDB14118	bHLH	13	31604205	31610576	+
IGDB14120	bHLH	13	31705209	31708046	+
IGDB14146	THAP	14	38655	64351	-
IGDB14155	Homeobox	14	394179	397534	-
IGDB14157	Homeobox	14	1006209	1112531	-
IGDB14167	TF_Otx	14	1957167	1959984	-
IGDB14195	zf-C2H2	14	3360376	3362765	+
IGDB14201	Homeobox	14	3652987	3657499	+
IGDB14223	IRF	14	4969798	4972984	+
IGDB14243	AF-4	14	6635162	6661602	-
IGDB14251	ESR-like	14	6905398	6958756	-
IGDB14257	Homeobox	14	7539542	7541461	-
IGDB14278	COE	14	8201026	8291967	+
IGDB14299	bHLH	14	8646503	8657958	+
IGDB14330	HMG	14	9662505	9666227	-
IGDB14342	MH1	14	10259378	10265522	-
IGDB14362	TF_bZIP	14	11092243	11097604	+
IGDB14376	GCFC	14	11580359	11591641	-
IGDB14463	zf-C2H2	14	14275000	14308633	-
IGDB14481	zf-C2H2	14	14938191	14940931	+
IGDB14488	zf-C2H2	14	15192819	15197326	-
IGDB14492	TF_bZIP	14	15279370	15284072	+
IGDB14499	Fork_head	14	15524308	15542612	-
IGDB14526	HTH	14	16010660	16014367	-
IGDB14552	bHLH	14	16600099	16627817	+
IGDB14556	ESR-like	14	16707313	16740829	-
IGDB14565	zf-C2H2	14	17312489	17326260	-
IGDB14570	Homeobox	14	17601533	17606012	+
IGDB14593	ESR-like	14	19593710	19607322	+
IGDB14614	HSF	14	20437501	20440551	+
IGDB14642	bHLH	14	21261853	21283861	+
IGDB14647	MYB	14	21570536	21583106	-
IGDB14668	zf-C2H2	14	22660745	22676447	-
IGDB14671	ZBTB	14	22711438	22718904	-
IGDB14676	THAP	14	22996727	23019698	-
IGDB14694	Homeobox	14	23422306	23428124	-
IGDB14749	zf-C2H2	14	25308450	25472472	-
IGDB14787	GTF2I	14	28236392	28263363	-
IGDB14789	zf-C2H2	14	28320772	28388614	+
IGDB14790	zf-C2H2	14	28397740	28417761	-
IGDB14791	Pou	14	28504511	28507848	+
IGDB14798	bHLH	14	28912047	28914157	+
IGDB14845	zf-C2H2	15	1738755	1742443	+
IGDB14849	Homeobox	15	1848083	1850159	+
IGDB14856	Homeobox	15	2158789	2161382	-
IGDB14886	Homeobox	15	4591100	4613378	+
IGDB14896	Homeobox	15	5198841	5206147	-
IGDB14913	RHD	15	7337263	7351610	+
IGDB14932	zf-C2H2	15	8555695	8610267	-
IGDB14984	Homeobox	15	11434181	11552125	-
IGDB14993	TF_Otx	15	12000600	12005514	-
IGDB15010	RHD	15	12630278	12642544	-
IGDB15014	Homeobox	15	12759465	12762872	+
IGDB15017	CSD	15	12825489	12839932	+
IGDB15026	zf-C2H2	15	12955035	12961760	+
IGDB15080	Homeobox	15	16137420	16140399	+
IGDB15081	Homeobox	15	16152371	16158082	-
IGDB15093	ARID	15	16536378	16614881	-
IGDB15099	zf-C2H2	15	16810368	16816639	+
IGDB15134	DACH	15	18574701	18598311	-
IGDB15140	zf-C2H2	15	18638500	18647953	+
IGDB15145	zf-C2H2	15	18718360	18723953	-
IGDB15146	Homeobox	15	18748185	18750811	+
IGDB15160	COE	15	19486210	19551549	-
IGDB15163	bHLH	15	19590945	19597278	-
IGDB15206	PAX	15	21631177	21658070	-
IGDB15227	zf-C2H2	15	22179202	22184867	+
IGDB15284	Homeobox	15	23852483	23855099	+
IGDB15285	zf-C2H2	15	23855093	23857990	-
IGDB15333	Fork_head	15	26091819	26113491	-
IGDB15383	ARID	15	28208393	28251520	-
IGDB15403	SRF	15	29043831	29061860	+
IGDB15415	LRRFIP	15	29721137	29738211	+
IGDB15436	Homeobox	15	30258855	30262751	-
IGDB15447	zf-C2H2	16	277842	333908	-
IGDB15453	zf-C2H2	16	1052757	1064615	-
IGDB15454	zf-C2H2	16	1064978	1068635	-
IGDB15456	zf-C2H2	16	1076935	1086589	-
IGDB15457	zf-C2H2	16	1088980	1098941	-
IGDB15458	zf-C2H2	16	1100556	1105348	-
IGDB15461	zf-C2H2	16	1114020	1120750	-
IGDB15464	zf-C2H2	16	1126693	1132695	-
IGDB15465	zf-C2H2	16	1155332	1182548	-
IGDB15468	zf-C2H2	16	1220304	1238678	+
IGDB15471	Homeobox	16	1281590	1312023	-
IGDB15472	zf-C2H2	16	1544325	1724917	+
IGDB15475	zf-C2H2	16	2088080	2185749	+
IGDB15479	RHD	16	2897165	2961875	+
IGDB15501	zf-C2H2	16	4658985	4664622	-
IGDB15507	Pou	16	4811792	4815371	-
IGDB15522	bHLH	16	5727453	5732133	+
IGDB15524	CP2	16	5871532	5885907	-
IGDB15530	zf-C2H2	16	6304811	6308216	-
IGDB15540	zf-C2H2	16	6576959	6581514	+
IGDB15594	ARID	16	9869283	9884247	-
IGDB15616	zf-C2H2	16	10494066	10508373	+
IGDB15630	E2F	16	11043332	11056472	+
IGDB15633	HMG	16	11447979	11451552	+
IGDB15639	Homeobox	16	12325088	12329528	+
IGDB15656	T-box	16	13424442	13429030	+
IGDB15684	bHLH	16	14565344	14576930	-
IGDB15690	Homeobox	16	14744906	14753031	+
IGDB15714	RXR-like	16	15728870	15739968	+
IGDB15715	zf-C2H2	16	15952877	15955727	+
IGDB15751	bHLH	16	16800146	16802134	-
IGDB15762	zf-C2H2	16	17358658	17365021	-
IGDB15769	NGFIB-like	16	17602800	17619335	+
IGDB15783	zf-C2HC	16	17838428	17854159	+
IGDB15799	THR-like	16	18094110	18111661	+
IGDB15803	zf-C2H2	16	18149357	18157581	+
IGDB15842	bHLH	16	19093399	19104237	+
IGDB15843	MBD	16	19106605	19117523	+
IGDB15846	zf-C2H2	16	19188073	19202928	+
IGDB15874	zf-C2H2	16	19523002	19531173	+
IGDB15875	TF_bZIP	16	19532789	19539851	+
IGDB15885	Fork_head	16	19860912	19865714	+
IGDB15934	zf-C2H2	16	20627418	20635593	+
IGDB15951	Pou	16	20954982	21015563	+
IGDB15956	zf-C2H2	16	21169390	21189861	+
IGDB15967	zf-C2H2	16	21548479	21553249	+
IGDB15968	ETS	16	21604671	21648083	+
IGDB15993	Fork_head	16	22729889	22759821	-
IGDB16000	CSD	16	22825789	22836530	-
IGDB16003	zf-C2H2	16	22855701	22867214	-
IGDB16024	Pou	16	23782758	23785754	-
IGDB16049	bHLH	16	24998282	25014135	-
IGDB16087	zf-C2H2	16	26685894	26698344	-
IGDB16093	CUT	16	26988647	26999838	-
IGDB16109	MYB	16	27728062	27747790	-
IGDB16112	ETS	16	27784175	27802863	+
IGDB16130	bHLH	16	28706997	28708379	-
IGDB16131	Homeobox	16	28711801	28719044	-
IGDB16144	RXR-like	16	29294445	29315583	+
IGDB16158	THR-like	16	29621808	29643232	-
IGDB16159	THR-like	16	29722481	29727759	-
IGDB16174	ETS	16	31011174	31027298	-
IGDB16179	T-box	16	31342551	31351747	-
IGDB16183	zf-C2H2	16	31559812	31563857	-
IGDB16198	zf-C2H2	16	32113800	32122123	+
IGDB16205	MH1	16	32282140	32291734	-
IGDB16207	TF_bZIP	16	32327313	32331780	+
IGDB16250	zf-C2H2	17	3036234	3039935	-
IGDB16251	zf-C2H2	17	3052803	3060744	-
IGDB16252	zf-C2H2	17	3062176	3066032	-
IGDB16254	zf-C2H2	17	3135951	3140269	+
IGDB16273	zf-C2H2	17	3590318	3636862	+
IGDB16284	MYB	17	4189005	4218381	-
IGDB16308	zf-C2H2	17	4914720	4918444	-
IGDB16324	zf-C2H2	17	5466490	5471048	-
IGDB16326	bHLH	17	5594387	5597977	-
IGDB16341	zf-C2H2	17	5861983	5881783	-
IGDB16360	TF_bZIP	17	6415213	6417153	+
IGDB16368	zf-C2H2	17	6593120	6606129	+
IGDB16369	zf-C2H2	17	6983034	6990429	+
IGDB16384	zf-C2H2	17	8659887	8663660	-
IGDB16406	zf-C2H2	17	10068310	10070982	+
IGDB16407	zf-C2H2	17	10071759	10075753	+
IGDB16408	zf-C2H2	17	10080052	10088134	+
IGDB16417	zf-C2H2	17	10341582	10343721	+
IGDB16426	HMG	17	10868367	10876835	+
IGDB16430	zf-C2H2	17	10928922	10937309	-
IGDB16431	zf-C2H2	17	10940472	10946523	-
IGDB16432	zf-C2H2	17	10947049	10950086	-
IGDB16433	THAP	17	10953724	10957137	-
IGDB16434	zf-C2H2	17	10968668	10971904	-
IGDB16435	zf-C2H2	17	10975003	10984262	-
IGDB16436	zf-C2H2	17	11024847	11030318	+
IGDB16437	zf-C2H2	17	11034644	11041445	+
IGDB16439	zf-C2H2	17	11044190	11052933	+
IGDB16441	zf-C2H2	17	11187562	11207065	+
IGDB16442	zf-C2H2	17	11266079	11288546	-
IGDB16443	zf-C2H2	17	11344767	11364489	-
IGDB16446	zf-C2H2	17	11452736	11457579	-
IGDB16447	zf-C2H2	17	11472556	11476743	-
IGDB16448	MYB	17	11545340	11552895	-
IGDB16456	zf-C2H2	17	11674811	11681994	-
IGDB16460	zf-C2H2	17	12150148	12156979	-
IGDB16461	zf-C2H2	17	12221546	12227361	-
IGDB16488	Homeobox	17	13258618	13262521	+
IGDB16492	MYB	17	13352417	13364605	+
IGDB16502	zf-C2H2	17	13683484	13690702	-
IGDB16506	Homeobox	17	13877774	13883468	+
IGDB16515	RXR-like	17	14171645	14181480	+
IGDB16530	TSC22	17	14710652	14745693	-
IGDB16562	TF_bZIP	17	15911190	15913044	+
IGDB16584	MYB	17	16594459	16603439	+
IGDB16597	ETS	17	17036356	17047780	+
IGDB16614	zf-C2H2	17	17346007	17352759	-
IGDB16618	CSRNP_N	17	17420235	17425320	-
IGDB16630	zf-C2H2	17	17646877	17652628	+
IGDB16632	HMG	17	17657695	17662822	-
IGDB16637	zf-C2H2	17	17699010	17707725	+
IGDB16642	Homeobox	17	17772414	17777183	+
IGDB16656	zf-C2H2	17	18698521	18715806	-
IGDB16662	THAP	17	19173506	19180626	+
IGDB16680	Homeobox	17	20584853	20591967	-
IGDB16692	HMG	17	20829812	20879954	-
IGDB16736	THR-like	17	22274522	22290664	+
IGDB16752	bHLH	17	22467449	22499130	-
IGDB16767	zf-GATA	17	22794602	22814553	-
IGDB16802	PAX	17	23532849	23549017	+
IGDB16810	bHLH	17	24189326	24194243	+
IGDB16843	bHLH	17	24986965	24990920	-
IGDB16862	zf-C2H2	17	25627376	25725185	-
IGDB16881	Fork_head	17	26539372	26541501	+
IGDB16896	TF_bZIP	17	27220083	27221437	-
IGDB16899	zf-C2H2	17	27318343	27320346	-
IGDB16903	zf-C2HC	17	27408855	27439611	-
IGDB16906	Homeobox	17	27632481	27634502	-
IGDB16933	zf-GATA	17	28578155	28583191	+
IGDB16973	E2F	17	30006530	30012523	-
IGDB16990	Homeobox	17	30396716	30402955	+
IGDB16993	zf-C2H2	17	30431725	30433968	-
IGDB17017	zf-NF-X1	18	298447	309079	-
IGDB17027	zf-C2H2	18	684128	691259	-
IGDB17028	zf-BED	18	698458	702825	+
IGDB17029	zf-C2H2	18	703862	709277	+
IGDB17115	zf-C2H2	18	5561169	5570283	+
IGDB17180	MH1	18	11780612	11844542	+
IGDB17198	MYB	18	13009254	13021043	+
IGDB17221	Homeobox	18	14260379	14262474	+
IGDB17231	CSD	18	14465210	14469737	+
IGDB17234	P53	18	14488455	14497264	+
IGDB17239	zf-C2H2	18	14612101	14636620	+
IGDB17245	zf-C2H2	18	14769810	14774192	+
IGDB17270	CSL	18	17287378	17338179	-
IGDB17314	Homeobox	18	18613803	18634023	+
IGDB17326	Homeobox	18	19003311	19006905	+
IGDB17359	HMG	18	21330617	21341446	-
IGDB17384	zf-C2H2	18	22368932	22387165	+
IGDB17423	HMG	18	26493300	26496926	-
IGDB17438	RHD	18	27206501	27228559	+
IGDB17467	zf-GATA	18	29078866	29101475	+
IGDB17468	zf-CCCH	18	29103825	29105016	+
IGDB17502	zf-C2H2	19	357940	366418	+
IGDB17550	THAP	19	2046404	2055694	+
IGDB17554	TF_bZIP	19	2087209	2094058	+
IGDB17566	TF_bZIP	19	2410332	2415868	-
IGDB17624	Homeobox	19	4190992	4193946	+
IGDB17625	Homeobox	19	4198013	4200347	-
IGDB17631	THR-like	19	4418401	4461631	-
IGDB17678	zf-C2H2	19	6809958	6819706	+
IGDB17686	HMG	19	6930616	6939333	-
IGDB17701	zf-C2H2	19	7444925	7448338	-
IGDB17719	zf-C2H2	19	7667884	7675410	-
IGDB17733	Homeobox	19	8029174	8035470	+
IGDB17739	IRF	19	8113093	8120225	-
IGDB17787	zf-C2H2	19	9350818	9359711	-
IGDB17804	bHLH	19	9690547	9693566	-
IGDB17806	HMG	19	9773563	9798204	-
IGDB17828	zf-MIZ	19	10596440	10600934	-
IGDB17863	Fork_head	19	12150395	12151991	+
IGDB17876	zf-GATA	19	12516853	12532753	+
IGDB17879	Homeobox	19	12581914	12583917	+
IGDB17918	AP-2	19	14110552	14116885	-
IGDB17930	zf-C2H2	19	15484409	15490073	+
IGDB17970	Homeobox	19	18106258	18114550	+
IGDB17971	ETS	19	18211892	18250641	+
IGDB17980	TF_bZIP	19	19060155	19069304	+
IGDB18007	zf-C2H2	19	20117849	20127299	+
IGDB18009	Fork_head	19	20140591	20151122	-
IGDB18057	HMG	19	22886101	22894828	+
IGDB18061	STAT	19	22928517	22951906	-
IGDB18068	Homeobox	19	23071849	23077756	+
IGDB18075	zf-C2H2	19	23373443	23375741	+
IGDB18107	zf-C2H2	2	282470	298983	-
IGDB18109	zf-C2H2	2	507885	515755	+
IGDB18110	zf-C2H2	2	542907	555215	-
IGDB18111	HMG	2	572086	592721	-
IGDB18112	HMG	2	640214	644853	-
IGDB18150	zf-C2H2	2	2769800	2852727	-
IGDB18168	STAT	2	3982894	3994222	-
IGDB18169	zf-C2H2	2	3997034	4017561	+
IGDB18172	zf-C2H2	2	4523096	4536497	-
IGDB18178	zf-C2H2	2	4732977	4952293	+
IGDB18179	zf-C2H2	2	4754341	4768400	-
IGDB18180	zf-C2H2	2	4777046	4787723	+
IGDB18181	zf-C2H2	2	4796825	4807879	-
IGDB18182	zf-C2H2	2	4999631	5049280	+
IGDB18187	zf-C2H2	2	5683015	5703977	-
IGDB18192	zf-C2H2	2	6163606	6226050	+
IGDB18194	zf-C2H2	2	6274823	6296687	+
IGDB18195	zf-C2H2	2	6303823	6320124	+
IGDB18197	zf-C2H2	2	6435594	6499478	+
IGDB18199	zf-C2H2	2	6610890	6619980	+
IGDB18200	zf-C2H2	2	6714180	6732466	-
IGDB18201	zf-C2H2	2	6743441	6779071	-
IGDB18202	zf-C2H2	2	6903838	6917624	-
IGDB18204	zf-C2H2	2	7087586	7101169	-
IGDB18206	zf-C2H2	2	7247245	7249622	+
IGDB18207	zf-C2H2	2	7271946	7297490	+
IGDB18209	zf-C2H2	2	7467583	7482788	+
IGDB18211	zf-C2H2	2	7562722	7578206	-
IGDB18212	zf-C2H2	2	7586904	7590795	-
IGDB18213	zf-C2H2	2	7662770	7674188	+
IGDB18216	zf-C2H2	2	8063522	8075543	-
IGDB18218	zf-C2H2	2	8090480	8105896	-
IGDB18222	zf-C2H2	2	8348664	8354555	-
IGDB18223	zf-C2H2	2	8554292	8560176	-
IGDB18226	zf-C2H2	2	8713368	8729385	-
IGDB18227	zf-C2H2	2	8737581	8750855	+
IGDB18228	zf-C2H2	2	8761413	8771017	-
IGDB18229	zf-C2H2	2	8801043	8816790	+
IGDB18230	zf-C2H2	2	8835072	8856035	+
IGDB18232	zf-C2H2	2	8899185	8904549	+
IGDB18233	zf-C2H2	2	8966140	8987770	-
IGDB18235	zf-C2H2	2	9106993	9113787	+
IGDB18236	zf-C2H2	2	9115396	9145754	+
IGDB18238	zf-C2H2	2	9208489	9220845	-
IGDB18239	zf-C2H2	2	9231829	9252665	-
IGDB18241	zf-C2H2	2	9308301	9341024	-
IGDB18242	zf-C2H2	2	9350491	9368165	+
IGDB18243	zf-C2H2	2	9545573	9550894	-
IGDB18244	zf-C2H2	2	9553250	9561716	-
IGDB18245	zf-C2H2	2	9677254	9694934	-
IGDB18252	THAP	2	9915147	9921073	-
IGDB18264	MBD	2	10254207	10260064	-
IGDB18270	zf-C2H2	2	10351966	10358359	+
IGDB18291	zf-C2H2	2	11277359	11285705	-
IGDB18300	zf-C2H2	2	11593683	11603360	+
IGDB18302	zf-C2H2	2	11673878	11686240	+
IGDB18304	zf-C2H2	2	11976116	12000318	+
IGDB18309	Pou	2	12565050	12568299	-
IGDB18325	TF_bZIP	2	14225473	14230136	-
IGDB18326	zf-C2H2	2	14354224	14407184	+
IGDB18344	TSC22	2	15394879	15414548	+
IGDB18366	bHLH	2	16778402	16781095	-
IGDB18437	TF_bZIP	2	23096857	23118873	+
IGDB18472	ETS	2	24487525	24540137	-
IGDB18499	zf-C2H2	20	1270111	1284696	-
IGDB18504	zf-C2H2	20	1599696	1606073	-
IGDB18523	zf-C2H2	20	3007979	3017805	-
IGDB18580	zf-C2H2	20	7105271	7165117	-
IGDB18581	zf-C2H2	20	7198758	7244493	+
IGDB18599	zf-C2H2	20	9497834	9502426	+
IGDB18646	Homeobox	20	12348913	12362450	-
IGDB18652	Homeobox	20	12547929	12549948	-
IGDB18661	AP-2	20	13119346	13127289	-
IGDB18673	zf-C2H2	20	13818641	13892178	+
IGDB18676	RXR-like	20	14083905	14092926	-
IGDB18692	Fork_head	20	14906809	14910169	+
IGDB18721	zf-C2H2	20	16617614	16622207	+
IGDB18730	MYB	20	17046477	17055604	+
IGDB18735	bHLH	20	17239008	17240933	-
IGDB18748	zf-C2H2	20	17489649	17492952	-
IGDB18760	bHLH	20	17670914	17676457	-
IGDB18785	CSRNP_N	20	18351079	18363687	+
IGDB18790	zf-C2H2	20	18566658	18569779	-
IGDB18791	zf-C2H2	20	18572699	18576999	+
IGDB18805	Homeobox	20	19222427	19226391	+
IGDB18810	Homeobox	20	19459479	19464103	+
IGDB18850	Pou	20	20697786	20784050	+
IGDB18853	bHLH	20	20854495	20856808	+
IGDB18858	zf-NF-X1	20	21137445	21147598	+
IGDB18920	IRF	20	23622175	23627671	-
IGDB18953	ETS	21	597847	604294	+
IGDB18970	LRRFIP	21	1490938	1505540	+
IGDB18977	T-box	21	2493456	2527161	-
IGDB18991	ETS	21	3707309	3713567	+
IGDB19032	zf-C2H2	21	5463279	5547424	+
IGDB19034	TF_bZIP	21	5603257	5617198	+
IGDB19048	bHLH	21	6762079	6766153	+
IGDB19056	Homeobox	21	7097546	7107814	+
IGDB19066	zf-C2H2	21	7750352	7754035	-
IGDB19068	zf-C2H2	21	7757278	7760455	+
IGDB19071	DACH	21	7927849	8038507	-
IGDB19072	zf-C2H2	21	8102576	8165353	-
IGDB19124	E2F	21	10674047	10685725	-
IGDB19164	zf-C2H2	21	12946139	12960846	+
IGDB19166	zf-C2H2	21	13010569	13024202	+
IGDB19169	zf-C2H2	21	13047012	13147895	+
IGDB19171	zf-C2H2	21	13086642	13119483	+
IGDB19209	HMG	21	16530674	16546535	-
IGDB19212	STAT	21	16600026	16613649	-
IGDB19213	STAT	21	16622340	16640720	-
IGDB19221	TSC22	21	17011845	17015855	-
IGDB19270	zf-C2H2	21	19648818	19651722	-
IGDB19292	NGFIB-like	21	20517556	20522232	-
IGDB19298	MBD	21	20933442	20963585	-
IGDB19302	T-box	21	21023223	21027389	+
IGDB19308	CSRNP_N	21	21419332	21441146	-
IGDB19327	zf-C2H2	21	21877836	21880844	+
IGDB19336	Homeobox	21	22033475	22035687	-
IGDB19341	zf-C2H2	21	22211276	22222969	-
IGDB19343	zf-C2H2	21	22280628	22283019	+
IGDB19349	TF_bZIP	21	22361974	22384512	-
IGDB19352	Homeobox	21	22521706	22523881	+
IGDB19353	Homeobox	21	22540248	22557584	+
IGDB19356	TF_bZIP	21	22679242	22685319	-
IGDB19373	HMG	21	23400281	23401976	+
IGDB19465	bHLH	21	27987204	28026969	+
IGDB19466	bHLH	21	28030168	28059638	-
IGDB19505	Homeobox	21	31115863	31124952	+
IGDB19514	Tub	22	276724	301560	-
IGDB19521	Fork_head	22	547758	551605	+
IGDB19522	zf-C2H2	22	552870	562324	-
IGDB19580	MYB	22	2199714	2209517	+
IGDB19593	ARID	22	2471398	2486268	+
IGDB19609	zf-C2H2	22	3044935	3053003	-
IGDB19624	zf-CCCH	22	4542541	4546686	+
IGDB19626	zf-GATA	22	4657481	4697530	-
IGDB19692	Homeobox	22	7173378	7247002	+
IGDB19730	zf-C2H2	22	8263143	8270206	+
IGDB19761	bHLH	22	9273963	9275571	+
IGDB19762	E2F	22	9281630	9293566	+
IGDB19767	CP2	22	9419433	9427427	-
IGDB19776	zf-C2H2	22	9919229	9932662	-
IGDB19781	zf-C2H2	22	10113432	10124174	-
IGDB19787	HMG	22	10643822	10646963	+
IGDB19790	bHLH	22	11297015	11298338	+
IGDB19797	zf-C2H2	22	11503012	11506229	-
IGDB19798	CP2	22	11512188	11528657	-
IGDB19814	zf-C2H2	22	11933313	11936241	+
IGDB19816	MYB	22	11946197	11950137	-
IGDB19823	Homeobox	22	12060559	12066351	+
IGDB19824	Homeobox	22	12071086	12073013	+
IGDB19857	TF_Otx	22	12877018	12881707	-
IGDB19874	TF_bZIP	22	13241885	13244060	+
IGDB19892	bHLH	22	13998400	14003310	-
IGDB19906	zf-C2H2	22	14653932	14659898	-
IGDB19933	bHLH	22	15092869	15095977	+
IGDB19955	Fork_head	22	16309136	16311438	+
IGDB19957	Homeobox	22	16451530	16453742	+
IGDB19960	zf-C2H2	22	16737691	16740539	-
IGDB19974	Runt	22	16928151	16952065	-
IGDB20012	zf-C2H2	22	19778550	19781142	-
IGDB20022	THAP	22	19926653	19950327	-
IGDB20130	TF_bZIP	22	25930130	25936076	-
IGDB20156	HMG	23	1240076	1339729	-
IGDB20169	ETS	23	2195900	2237241	-
IGDB20174	ETS	23	2622963	2634422	+
IGDB20184	HMG	23	3590956	3599604	+
IGDB20212	bHLH	23	4822782	4833669	+
IGDB20214	Fork_head	23	5134807	5253086	-
IGDB20226	zf-C2H2	23	6530902	6541699	-
IGDB20233	THR-like	23	6734358	6754591	-
IGDB20245	zf-BED	23	7333682	7344383	-
IGDB20260	NF-YB	23	8919177	8922661	+
IGDB20272	MYB	23	9544800	9561274	+
IGDB20284	E2F	23	10249078	10255828	-
IGDB20290	zf-C2H2	23	10831588	10844401	-
IGDB20293	zf-C2H2	23	10991027	11007272	-
IGDB20294	zf-C2H2	23	11009312	11012200	-
IGDB20295	zf-C2H2	23	11043544	11059219	-
IGDB20297	zf-C2H2	23	11172362	11176759	-
IGDB20335	zf-C2H2	23	12811765	12845092	+
IGDB20342	zf-C2H2	23	13593323	13603091	+
IGDB20371	zf-C2H2	23	14684953	14688364	-
IGDB20379	Nrf1	23	14758976	14771993	-
IGDB20402	PAX	23	16301820	16353337	-
IGDB20429	zf-C2H2	23	17516132	17521813	-
IGDB20458	Tub	23	18828509	18847142	-
IGDB20459	Fork_head	23	18847320	18854881	+
IGDB20479	zf-C2H2	23	20004729	20012269	+
IGDB20485	bHLH	23	20238135	20239762	-
IGDB20499	TF_bZIP	23	20602224	20631683	+
IGDB20512	zf-C2H2	23	21180603	21183208	-
IGDB20519	zf-GATA	23	22107081	22113027	-
IGDB20568	IRF	23	23847977	23853586	-
IGDB20587	bHLH	24	277107	289083	-
IGDB20606	zf-C2H2	24	1170602	1181747	-
IGDB20614	ESR-like	24	1449214	1481886	+
IGDB20621	zf-C2H2	24	1948390	1955979	+
IGDB20626	zf-C2H2	24	1996801	2002374	-
IGDB20638	zf-C2H2	24	2538261	2543813	-
IGDB20651	T-box	24	3326860	3333713	-
IGDB20657	zf-C2H2	24	3555747	3579995	-
IGDB20667	Fork_head	24	4175439	4251160	-
IGDB20747	CSD	24	6929754	6952825	-
IGDB20749	zf-C2H2	24	6970282	6976978	+
IGDB20753	bHLH	24	7132816	7137611	+
IGDB20762	RXR-like	24	7493201	7499539	+
IGDB20765	Fork_head	24	7544787	7579312	+
IGDB20795	zf-C2H2	24	8923434	8932830	-
IGDB20797	ESR-like	24	8942496	8950884	+
IGDB20807	HPD	24	9238212	9265157	-
IGDB20839	HSF	24	10655203	10664269	+
IGDB20853	ZBTB	24	12022179	12026060	-
IGDB20854	zf-C2H2	24	12027548	12033518	+
IGDB20900	Homeobox	24	13687268	13699374	+
IGDB20908	zf-C2H2	24	13781234	13790154	-
IGDB20910	HMG	24	13927038	13929865	-
IGDB20924	MYB	24	14304777	14312436	+
IGDB20936	ESR-like	24	14857460	14876826	+
IGDB20945	Pou	24	15109117	15111934	+
IGDB20973	Fork_head	24	16168315	16171240	+
IGDB20975	zf-C2H2	24	16280275	16282874	-
IGDB20990	zf-GATA	24	16924971	16933298	-
IGDB20997	TF_bZIP	24	17152584	17154914	-
IGDB20998	TF_bZIP	24	17161189	17163723	+
IGDB20999	TF_bZIP	24	17175622	17185477	+
IGDB21022	zf-C2H2	24	17683615	17686060	-
IGDB21037	AP-2	24	18914846	18924446	-
IGDB21038	AP-2	24	18941378	18953612	-
IGDB21044	ESR-like	24	19235477	19253990	-
IGDB21057	zf-C2H2	24	19663336	19679276	+
IGDB21079	TF_bZIP	24	20455525	20543833	-
IGDB21082	HMG	24	21202763	21211375	-
IGDB21110	zf-C2H2	24	22284464	22288988	-
IGDB21117	zf-C2HC	24	22467612	22524111	+
IGDB21118	E2F	24	22526739	22535873	+
IGDB21141	TF_bZIP	24	23407992	23411956	-
IGDB21147	zf-C2H2	24	23556956	23560570	-
IGDB21167	Fork_head	3	884628	891389	-
IGDB21189	zf-C2H2	3	3756956	3761070	-
IGDB21194	zf-C2H2	3	3974306	4000186	-
IGDB21226	E2F	3	6168028	6176143	-
IGDB21253	THR-like	3	9857074	9873898	-
IGDB21254	THAP	3	9875276	9880210	+
IGDB21295	zf-MIZ	3	12427625	12504524	-
IGDB21297	MH1	3	12624747	12652377	-
IGDB21298	MH1	3	12674002	12697091	-
IGDB21354	Homeobox	3	14444205	14447872	+
IGDB21466	Tub	3	19408178	19460551	+
IGDB21483	TEA	3	20225307	20275615	-
IGDB21495	zf-C2H2	3	20695169	20807252	-
IGDB21499	zf-C2H2	3	21122640	21135294	+
IGDB21512	bHLH	3	21440861	21463410	-
IGDB21515	RFX	3	21538596	21554835	+
IGDB21524	zf-C2H2	3	21681854	21688684	-
IGDB21531	THAP	3	21745447	21747732	+
IGDB21547	Fork_head	3	22181412	22185048	-
IGDB21555	TF_bZIP	3	22862001	22864840	-
IGDB21568	zf-C2H2	3	23303370	23310697	+
IGDB21569	PAX	3	23341228	23359138	+
IGDB21611	GCFC	3	24724137	24731111	+
IGDB21624	zf-C2H2	3	25618024	25622339	-
IGDB21626	IRF	3	25672017	25681009	+
IGDB21631	MYB	3	25710601	25717284	-
IGDB21641	RHD	3	26302047	26364816	-
IGDB21646	Homeobox	3	26530927	26535652	+
IGDB21655	zf-C2H2	3	26828181	26856225	-
IGDB21667	CUT	3	27196776	27206533	-
IGDB21691	Homeobox	3	29008376	29013088	-
IGDB21692	Homeobox	3	29151882	29155295	-
IGDB21694	Homeobox	3	29356431	29359660	+
IGDB21700	HMG	3	29848239	29889113	+
IGDB21702	zf-C2H2	3	30114625	30126420	+
IGDB21733	Homeobox	3	31368861	31384582	+
IGDB21747	ARID	3	32482530	32548172	+
IGDB21754	RXR-like	3	32776215	32780489	+
IGDB21771	zf-C2H2	3	35429886	35447028	-
IGDB21786	zf-C2H2	3	37298716	37308277	+
IGDB21796	TF_bZIP	3	37769779	37775653	-
IGDB21798	TF_bZIP	3	37780173	37781762	+
IGDB21901	TF_bZIP	4	4001715	4008327	-
IGDB21911	HMG	4	4464769	4466756	+
IGDB21952	THR-like	4	6572088	6584082	+
IGDB21975	TF_bZIP	4	7634574	7641964	+
IGDB21977	HMG	4	7692287	7698488	+
IGDB21980	bHLH	4	7763574	7787068	-
IGDB21982	zf-MIZ	4	7817835	7831516	-
IGDB22037	HMG	4	10335455	10338182	+
IGDB22049	SF-like	4	11360344	11428067	-
IGDB22062	TSC22	4	12455241	12459590	-
IGDB22072	bHLH	4	12733014	12734655	-
IGDB22096	ARID	4	13474882	13519522	+
IGDB22114	TF_bZIP	4	13820324	13822077	-
IGDB22128	Homeobox	4	14401184	14411252	+
IGDB22135	RXR-like	4	14677601	14686415	+
IGDB22147	RFX	4	14943657	14973142	+
IGDB22175	Fork_head	4	16192698	16195004	-
IGDB22197	zf-C2H2	4	17582407	17597216	+
IGDB22224	HMG	4	18600645	18602920	-
IGDB22265	Fork_head	4	21052774	21054905	-
IGDB22266	Fork_head	4	21076964	21080515	-
IGDB22267	Fork_head	4	21084017	21085731	-
IGDB22288	TF_bZIP	4	22046163	22049239	+
IGDB22297	Homeobox	4	23339042	23355711	-
IGDB22316	zf-C2H2	4	24008507	24015879	+
IGDB22340	Homeobox	4	24747409	24789039	-
IGDB22341	zf-C2H2	4	24827842	24831330	-
IGDB22363	TF_bZIP	4	26332322	26334262	+
IGDB22407	zf-C2H2	4	27142363	27147714	-
IGDB22412	P53	4	27444930	27461245	+
IGDB22413	zf-C2H2	4	27462506	27468835	-
IGDB22448	zf-C2H2	4	28449340	28504354	+
IGDB22469	Homeobox	4	29309843	29313743	+
IGDB22473	TF_bZIP	4	29452808	29481449	-
IGDB22474	RXR-like	4	29488969	29526770	+
IGDB22481	Fork_head	4	29819944	29822197	-
IGDB22485	MYB	4	30031254	30053280	+
IGDB22512	DM	4	31230621	31233099	-
IGDB22551	zf-C2H2	5	585395	598156	-
IGDB22575	TF_bZIP	5	1624590	1637158	-
IGDB22607	IRF	5	2484765	2491894	-
IGDB22635	zf-GATA	5	3686564	3693404	+
IGDB22650	zf-C2H2	5	4008047	4016389	-
IGDB22658	STAT	5	4160443	4183196	+
IGDB22660	bHLH	5	4252201	4255071	-
IGDB22664	MYB	5	4286245	4307118	-
IGDB22670	zf-GATA	5	4609775	4623794	+
IGDB22710	Fork_head	5	6491632	6537850	+
IGDB22741	HMGA	5	7727763	7739359	-
IGDB22762	zf-C2H2	5	8413801	8435170	-
IGDB22764	Fork_head	5	8451463	8532243	-
IGDB22779	PAX	5	8880992	8924110	+
IGDB22785	THR-like	5	9208095	9248118	-
IGDB22821	TF_bZIP	5	10643755	10647530	+
IGDB22850	AP-2	5	12732593	12740779	-
IGDB22862	TEA	5	12926304	12958950	-
IGDB22916	zf-GATA	5	15367890	15379574	+
IGDB22938	zf-C2H2	5	16774459	16780064	-
IGDB22978	zf-C2H2	5	18227423	18236326	-
IGDB22999	zf-C2H2	5	19703136	19706724	-
IGDB23003	zf-C2H2	5	19940892	19947773	+
IGDB23015	ETS	5	20346661	20349667	-
IGDB23041	MYB	5	23217065	23226385	-
IGDB23053	HMG	5	23664029	23719481	+
IGDB23058	ETS	5	24081910	24100694	-
IGDB23065	bHLH	5	24598641	24601603	+
IGDB23097	bHLH	5	26016441	26017583	-
IGDB23104	zf-C2H2	5	26240366	26243825	-
IGDB23108	Homeobox	5	26273275	26290709	-
IGDB23111	zf-GATA	5	26350852	26354479	-
IGDB23114	bHLH	5	26413928	26424226	+
IGDB23115	MBD	5	26438016	26454710	+
IGDB23123	bHLH	5	26737452	26740725	-
IGDB23135	LRRFIP	5	27069339	27074342	+
IGDB23152	THR-like	5	27351054	27386146	-
IGDB23153	THR-like	5	27409333	27418718	+
IGDB23163	NGFIB-like	5	27713615	27718296	+
IGDB23181	Fork_head	5	28293955	28380293	+
IGDB23183	bHLH	5	28456864	28485519	-
IGDB23198	zf-C2H2	5	28740711	28746735	+
IGDB23222	bHLH	5	29607868	29613059	+
IGDB23224	THR-like	5	29687599	29713208	-
IGDB23235	Homeobox	5	30137778	30142951	+
IGDB23245	Homeobox	5	30683523	30685265	-
IGDB23310	bHLH	6	393382	425547	-
IGDB23313	TEA	6	740065	792420	+
IGDB23349	SAND	6	3557768	3574240	+
IGDB23379	zf-C2H2	6	5241178	5254000	-
IGDB23420	bHLH	6	6431556	6435478	-
IGDB23426	zf-C2H2	6	6716295	6729301	-
IGDB23429	RHD	6	6741717	6764095	-
IGDB23445	HMG	6	7754115	7883487	-
IGDB23483	HMG	6	9211081	9219569	-
IGDB23513	THR-like	6	11396721	11431478	+
IGDB23518	TEA	6	11670036	11712457	-
IGDB23569	ETS	6	13707919	13715276	-
IGDB23572	RXR-like	6	13765424	13772146	+
IGDB23579	HMG	6	13979372	13989788	+
IGDB23582	zf-C2H2	6	14244607	14262444	-
IGDB23592	Homeobox	6	14802420	14825927	-
IGDB23598	ARID	6	14932610	14944202	-
IGDB23615	bHLH	6	15283869	15295487	-
IGDB23616	RFX	6	15305773	15317827	+
IGDB23626	ETS	6	15434209	15437170	-
IGDB23670	zf-MIZ	6	16285897	16295674	-
IGDB23672	MH1	6	16368707	16376235	-
IGDB23673	MH1	6	16397708	16420138	-
IGDB23702	zf-C2H2	6	17007193	17021222	+
IGDB23707	Fork_head	6	17129858	17132015	+
IGDB23710	THR-like	6	17180053	17224594	-
IGDB23724	zf-C2H2	6	17693504	17701965	-
IGDB23733	zf-C2H2	6	17906389	17911177	-
IGDB23746	RXR-like	6	18575059	18579788	+
IGDB23749	SRF	6	18792437	18858164	-
IGDB23770	Homeobox	6	19398437	19406019	+
IGDB23803	RHD	6	20926585	20945217	+
IGDB23823	bHLH	6	21405841	21426457	+
IGDB23826	RFX	6	21498628	21515423	+
IGDB23829	THR-like	6	21559114	21570061	+
IGDB23835	bHLH	6	21700986	21704194	+
IGDB23850	ETS	6	22859873	22867657	+
IGDB23858	bHLH	6	23276300	23277853	-
IGDB23868	zf-C2H2	6	23890153	23918519	+
IGDB23870	zf-C2H2	6	23965981	23973802	-
IGDB23907	CBF	6	26050285	26091732	+
IGDB23909	HSF	6	26115352	26134235	-
IGDB23921	zf-C2H2	6	26375128	26466103	+
IGDB23938	THAP	6	27011758	27017665	-
IGDB23979	zf-C2H2	6	27726842	27736431	-
IGDB24036	zf-C2H2	6	30549219	30566681	-
IGDB24114	CSD	7	1564094	1581308	-
IGDB24122	E2F	7	1995375	2002841	-
IGDB24123	zf-C2H2	7	2003487	2010992	+
IGDB24133	zf-C2H2	7	3026221	3039641	-
IGDB24163	Homeobox	7	4525695	4535652	-
IGDB24170	TF_bZIP	7	4710305	4713371	+
IGDB24180	zf-C2H2	7	4869465	4873398	-
IGDB24242	MYB	7	7335902	7345739	-
IGDB24244	zf-C2HC	7	7361453	7381759	-
IGDB24263	bHLH	7	7667036	7668390	-
IGDB24271	CSD	7	7799557	7804059	+
IGDB24276	P53	7	8136415	8152297	-
IGDB24279	zf-C2H2	7	8186656	8204271	-
IGDB24286	zf-C2H2	7	8634564	8641009	-
IGDB24289	Fork_head	7	8660230	8735628	-
IGDB24292	zf-C2H2	7	8794827	8807535	-
IGDB24295	HMG	7	8881750	8970825	-
IGDB24324	bHLH	7	10093260	10094938	+
IGDB24348	NF-YA	7	10739161	10747858	+
IGDB24357	zf-C2H2	7	10911616	10925096	-
IGDB24370	THR-like	7	11240929	11251671	-
IGDB24377	TF_bZIP	7	11307360	11325441	+
IGDB24381	STAT	7	11499241	11534021	+
IGDB24405	bHLH	7	12009544	12012323	+
IGDB24408	zf-C2H2	7	12172029	12174664	+
IGDB24417	zf-C2H2	7	12335245	12342704	+
IGDB24427	THR-like	7	12587587	12632039	+
IGDB24431	Homeobox	7	12699609	12703261	+
IGDB24432	Homeobox	7	12708896	12712473	+
IGDB24433	Homeobox	7	12738961	12743039	+
IGDB24435	Homeobox	7	12754948	12757107	+
IGDB24436	Homeobox	7	12765656	12769833	+
IGDB24439	zf-C2H2	7	12865719	12872223	-
IGDB24453	TEA	7	13422070	13437770	-
IGDB24486	zf-C2H2	7	14739413	14741940	-
IGDB24492	Homeobox	7	14836696	14849719	-
IGDB24495	TF_bZIP	7	15080782	15084450	-
IGDB24504	zf-C2H2	7	15545925	15576140	+
IGDB24506	zf-C2H2	7	15623335	15689543	+
IGDB24510	bHLH	7	15898108	15899733	+
IGDB24541	RXR-like	7	17002324	17016363	+
IGDB24567	IRF	7	17871953	17880107	+
IGDB24578	bHLH	7	18846166	18852569	-
IGDB24583	bHLH	7	18920998	18988862	+
IGDB24587	MBD	7	19036797	19054267	-
IGDB24618	HMGA	7	19764535	19770016	-
IGDB24625	Fork_head	7	20246431	20258562	+
IGDB24626	bHLH	7	20267246	20293435	-
IGDB24659	THAP	7	21164332	21169247	-
IGDB24692	TF_bZIP	7	21871792	21873030	-
IGDB24695	zf-C2H2	7	21957724	21963855	+
IGDB24708	NGFIB-like	7	22178049	22182618	-
IGDB24717	CP2	7	22382059	22394440	+
IGDB24718	CSRNP_N	7	22395551	22403360	+
IGDB24742	zf-C2H2	7	24218913	24227852	-
IGDB24751	zf-C2H2	7	24725783	24733347	+
IGDB24752	zf-C2H2	7	24805472	24858775	-
IGDB24754	zf-C2H2	7	25000343	25006134	+
IGDB24755	zf-C2H2	7	25032509	25046390	+
IGDB24757	RHD	7	25114977	25139814	+
IGDB24768	RXR-like	7	25751720	25759513	-
IGDB24785	zf-C2H2	7	26148566	26153480	+
IGDB24846	zf-C2HC	7	30067744	30109924	+
IGDB24848	zf-C2H2	7	30157186	30173768	+
IGDB24879	SAND	7	31540276	31560379	+
IGDB24899	ETS	7	33722355	33755383	-
IGDB24919	zf-C2H2	8	301753	316413	+
IGDB24930	zf-C2H2	8	595425	598040	+
IGDB24970	TF_bZIP	8	1980281	1988695	-
IGDB24972	Fork_head	8	2039241	2053126	-
IGDB24994	Fork_head	8	2712616	2716645	+
IGDB25031	THAP	8	3921718	3925776	-
IGDB25056	HMG	8	4605782	4608165	+
IGDB25065	zf-C2H2	8	5056949	5064524	-
IGDB25094	bHLH	8	5805476	5809760	+
IGDB25097	zf-C2H2	8	5907020	5908983	-
IGDB25107	zf-C2H2	8	6002792	6056041	-
IGDB25112	STAT	8	6278050	6332408	-
IGDB25114	STAT	8	6336681	6348066	-
IGDB25149	TF_bZIP	8	7334180	7345647	-
IGDB25152	Homeobox	8	7460883	7463407	-
IGDB25218	Homeobox	8	9084666	9098495	-
IGDB25221	zf-C2H2	8	9125450	9127363	+
IGDB25222	zf-C2H2	8	9129920	9132907	+
IGDB25279	TF_bZIP	8	10516255	10528582	+
IGDB25282	HMG	8	10698984	10702657	+
IGDB25286	HMG	8	10919815	10923207	-
IGDB25305	bHLH	8	11222790	11230421	+
IGDB25354	bHLH	8	12400978	12414513	+
IGDB25382	RFX	8	13230778	13244066	-
IGDB25476	zf-LITAF-like	8	17809873	17817062	-
IGDB25493	TF_bZIP	8	18812098	18814664	-
IGDB25512	zf-CCCH	8	19280331	19286138	-
IGDB25529	TF_bZIP	8	19453935	19460396	+
IGDB25533	CSD	8	19490706	19497599	+
IGDB25547	HMG	8	19820022	19826208	-
IGDB25552	bHLH	8	19994906	20008435	+
IGDB25587	HMG	8	21063565	21070574	+
IGDB25605	TF_bZIP	8	21670017	21671747	-
IGDB25624	TF_bZIP	8	22313988	22323791	-
IGDB25625	TF_bZIP	8	22332851	22335165	-
IGDB25644	CSD	8	23183844	23206653	-
IGDB25666	Homeobox	8	24108922	24113358	-
IGDB25668	Homeobox	8	24135530	24138365	+
IGDB25669	Homeobox	8	24163096	24175581	+
IGDB25671	Homeobox	8	24236569	24239861	+
IGDB25672	Homeobox	8	24247718	24273227	+
IGDB25674	Homeobox	8	24276452	24279425	+
IGDB25682	zf-C2H2	8	24581012	24592604	-
IGDB25727	HMG	8	25796773	25817032	+
IGDB25811	TF_bZIP	9	3831631	3834017	-
IGDB25830	zf-C2H2	9	4901743	4907076	+
IGDB25854	zf-C2H2	9	5985653	6005408	+
IGDB25871	THAP	9	6281851	6291646	+
IGDB25925	zf-C2H2	9	7685255	7692321	-
IGDB25934	TF_bZIP	9	8381566	8386437	-
IGDB25936	zf-C2H2	9	8396609	8404477	-
IGDB25952	Fork_head	9	9160069	9161722	+
IGDB25964	MYB	9	9567927	9577205	+
IGDB25973	bHLH	9	9723793	9725781	-
IGDB25981	MH1	9	10570315	10579716	-
IGDB26015	bHLH	9	12067747	12083137	+
IGDB26039	COE	9	12420528	12448334	+
IGDB26072	Fork_head	9	13250075	13256434	+
IGDB26090	T-box	9	13467212	13477948	-
IGDB26094	GCFC	9	13550029	13554777	+
IGDB26139	SRF	9	14870977	14936820	-
IGDB26149	RXR-like	9	15618454	15626530	+
IGDB26170	zf-C2H2	9	16476415	16480282	-
IGDB26181	Homeobox	9	16767189	16769095	-
IGDB26206	HMG	9	17485759	17517010	+
IGDB26227	THR-like	9	18566939	18587923	+
IGDB26260	Homeobox	9	19130466	19188791	+
IGDB26262	Homeobox	9	19400201	19441515	+
IGDB26281	MYB	9	20373422	20440954	+
IGDB26292	T-box	9	20718961	20721638	-
IGDB26309	Homeobox	9	21455922	21464184	+
IGDB26344	T-box	9	23696408	23704017	-
IGDB26353	bHLH	9	24881689	24903833	+
IGDB26356	bHLH	9	24932622	24951769	+
IGDB26366	MH1	9	25276935	25289428	+
IGDB26369	zf-C2H2	9	25316620	25322154	+
IGDB26405	MYB	9	26920714	26932933	-
IGDB26414	Homeobox	9	27495240	27504020	+
IGDB26416	SF-like	9	27742856	27767235	-
IGDB26466	Homeobox	9	30089339	30094608	-
IGDB26470	PC4	9	30257126	30259484	-
IGDB26496	zf-MIZ	9	31099209	31124812	+
IGDB26499	zf-C2H2	9	31278550	31286910	-
IGDB26532	zf-C2H2	9	32456608	32461161	-
