# Supplementary material for: Dynamic transcriptional and chromatin accessibility landscape of medaka embryogenesis
Source: Genome Res. 2020 Jun;30(6):924–37. doi: 10.1101/gr.258871.119 (PMC7370878; doi:10.1101/gr.258871.119)
Supplement: Supplemental Material [file supp_gr.258871.119_Supplemental_Table_S3.xlsx]

## Sheet: Sheet1
Supplemental Table S3 : List of long non-coding RNAs identified in this study.
IGDB	chr	start	end	strand
IGDB02411	14	7928391	7932542	+
IGDB09809	9	472721	474615	-
IGDB10295	000062F	1468	2226	-
IGDB10296	000062F	7600	7807	-
IGDB10297	000062F	8693	11960	+
IGDB10322	000266F	12644	24399	+
IGDB10324	000281F	25595	27135	-
IGDB10340	000316F	640444	849564	+
IGDB10344	000316F	918680	923417	+
IGDB10347	000325F	64827	74629	+
IGDB10348	000325F	128564	196792	+
IGDB10356	000377F	518428	519570	+
IGDB10374	000408F	547985	550839	+
IGDB10383	000437F	266225	269714	-
IGDB10384	000437F	277819	281296	-
IGDB10388	000437F	526719	547011	+
IGDB10391	000442F	50888	101124	+
IGDB10415	000458F	275412	298710	-
IGDB10419	000473F	175074	179351	+
IGDB10420	000473F	175074	179356	-
IGDB10431	000476F	307921	311788	+
IGDB10432	000476F	307926	311785	-
IGDB10433	000476F	364400	368245	+
IGDB10436	000480F	3149	7275	-
IGDB10444	000486F	138155	158126	+
IGDB10450	000511F	261791	262369	-
IGDB10462	000520F	150712	153734	-
IGDB10465	000523F	22205	22467	+
IGDB10492	000530F	142486	147047	+
IGDB10508	000542F	171175	175122	-
IGDB10520	000551F	1007	97543	-
IGDB10525	000556F	12085	12357	-
IGDB10527	000559F	231119	242717	-
IGDB10534	000575F	183692	187880	+
IGDB10535	000575F	183697	187979	-
IGDB10537	000575F	301727	307277	-
IGDB10542	000576F	58993	62966	+
IGDB10554	000583F	74067	107508	-
IGDB10564	000593F	264851	268190	+
IGDB10574	000601F	84058	86646	+
IGDB10576	000601F	164103	165789	+
IGDB10577	000601F	170012	171538	-
IGDB10584	000614F	114733	116294	+
IGDB10610	000637F	157380	160186	+
IGDB10615	000645F	148383	161878	-
IGDB10630	000658F	17098	18324	+
IGDB10640	000666F	24128	40189	-
IGDB10649	000672F	128029	131351	+
IGDB10651	000672F	133762	143905	+
IGDB10654	000673F	17110	19199	+
IGDB10656	000679F	52639	133967	+
IGDB10657	000679F	57792	63337	+
IGDB10671	000692F	184484	188257	-
IGDB10690	000721F	118509	123998	+
IGDB10691	000721F	150790	152706	+
IGDB10710	000746F	30015	79970	+
IGDB10723	000762F	22220	25768	+
IGDB10727	000769F	77909	79369	-
IGDB10732	000776F	75060	76370	-
IGDB10734	000777F	39161	41554	-
IGDB10742	000785F	90203	91275	-
IGDB10743	000795F	37811	57741	+
IGDB10758	000807F	43621	45686	+
IGDB10759	000807F	43984	45675	-
IGDB10766	000816F	14495	24385	+
IGDB10767	000816F	40547	42499	-
IGDB10771	000822F	31164	34242	+
IGDB10785	000836F	59445	70770	+
IGDB10789	000846F	2366	3176	+
IGDB10804	000876F	12896	16383	+
IGDB10805	000879F	28086	37561	-
IGDB10813	000900F	4462	7695	+
IGDB10827	000960F	11017	14535	+
IGDB10837	000983F	9078	12346	-
IGDB10840	000985F	40109	40347	+
IGDB10844	000995F	36576	36812	-
IGDB10852	001025F	3114	11487	-
IGDB10853	001025F	6268	11482	+
IGDB10858	001036F	21380	25701	+
IGDB10870	001138F	7858	12245	-
IGDB10873	001153F	11667	15094	+
IGDB10877	001212F	2071	3914	-
IGDB10895	1	316102	321035	+
IGDB10897	1	468864	470439	-
IGDB10908	1	843677	848227	-
IGDB10915	1	998820	999288	-
IGDB10920	1	1079040	1084421	-
IGDB10940	1	1719271	1725678	-
IGDB10966	1	2596765	2597042	+
IGDB10983	1	3181288	3190243	-
IGDB10986	1	3282755	3290445	+
IGDB11030	1	4815822	4818876	-
IGDB11042	1	5593801	5595778	-
IGDB11047	1	5891686	5893519	-
IGDB11048	1	5926389	5930421	-
IGDB11049	1	5946506	5952331	-
IGDB11060	1	7740040	7742233	-
IGDB11095	1	9048096	9050567	-
IGDB11105	1	9687780	9690789	+
IGDB11107	1	9705602	9712141	+
IGDB11113	1	9822444	9827189	-
IGDB11118	1	10069853	10073307	+
IGDB11124	1	10188787	10192915	-
IGDB11170	1	11693862	11696018	-
IGDB11171	1	11746926	11750066	-
IGDB11192	1	12733322	12736079	-
IGDB11197	1	12920883	12933359	-
IGDB11218	1	13445256	13551688	-
IGDB11220	1	13492070	13494711	-
IGDB11290	1	16902247	16904365	+
IGDB11299	1	17742540	17746824	+
IGDB11306	1	18108931	18111374	+
IGDB11316	1	18468401	18470601	+
IGDB11327	1	19048898	19051615	+
IGDB11380	1	21695287	21697230	+
IGDB11396	1	22395241	22399177	-
IGDB11455	1	24955183	25062472	+
IGDB11456	1	25052617	25055768	-
IGDB11464	1	26399428	26402929	-
IGDB11509	1	28812587	28815156	+
IGDB11522	1	29121209	29124557	-
IGDB11536	1	29601115	29604277	+
IGDB11575	1	30938107	30940532	+
IGDB11580	1	31305583	31325808	+
IGDB11592	1	32587680	32669680	+
IGDB11658	1	37165054	37338717	-
IGDB11710	10	4091538	4094559	-
IGDB11736	10	6092176	6094435	+
IGDB11739	10	6505507	6505725	-
IGDB11751	10	7014318	7015270	+
IGDB11773	10	8621788	8624894	+
IGDB11774	10	8688302	8690935	+
IGDB11775	10	8804246	8806995	-
IGDB11776	10	8947867	8950609	+
IGDB11813	10	10844420	10855562	+
IGDB11814	10	10857938	10861069	-
IGDB11819	10	10995358	10999351	-
IGDB11830	10	11237503	11248344	-
IGDB11857	10	11827177	11829535	+
IGDB11868	10	12079175	12081510	-
IGDB11869	10	12316198	12320224	+
IGDB11870	10	12321334	12321598	+
IGDB11879	10	12410676	12421478	-
IGDB11887	10	12550998	12552558	+
IGDB11892	10	12880230	12882722	-
IGDB11894	10	13504876	13507100	+
IGDB11936	10	15210706	15215068	+
IGDB11937	10	15232899	15241119	+
IGDB11955	10	15894615	15901305	+
IGDB11992	10	17080974	17085749	-
IGDB12003	10	17466544	17475072	-
IGDB12019	10	17650207	17668223	+
IGDB12023	10	17740616	17747406	-
IGDB12030	10	18184486	18187914	-
IGDB12032	10	18231619	18234317	+
IGDB12035	10	18329169	18332564	+
IGDB12061	10	19512874	19548754	+
IGDB12108	10	21428969	21432209	-
IGDB12122	10	22480503	22483662	-
IGDB12126	10	23045371	23049418	-
IGDB12127	10	23045372	23049418	+
IGDB12129	10	23532733	23533797	+
IGDB12135	10	24569301	24570780	+
IGDB12141	10	24929486	24931647	+
IGDB12174	10	26396332	26434972	+
IGDB12197	10	27181032	27186467	-
IGDB12199	10	27187428	27189430	-
IGDB12208	10	27621310	27625825	-
IGDB12216	10	27837088	27840435	-
IGDB12228	10	29001146	29004346	-
IGDB12244	10	30848470	30850008	-
IGDB12265	11	590565	596065	+
IGDB12289	11	1549595	1567067	-
IGDB12290	11	1554348	1567066	+
IGDB12297	11	2047036	2048488	+
IGDB12307	11	2681363	2683577	-
IGDB12310	11	2942718	2945591	+
IGDB12322	11	3928007	3930228	-
IGDB12332	11	4472105	4473778	+
IGDB12355	11	4877772	4880350	+
IGDB12356	11	5100773	5100987	-
IGDB12371	11	5576157	5578814	-
IGDB12389	11	6118369	6120200	+
IGDB12400	11	7015169	7016914	+
IGDB12418	11	8472972	8475580	+
IGDB12456	11	10261871	10264501	-
IGDB12458	11	10346114	10349505	-
IGDB12467	11	10714935	10720304	-
IGDB12472	11	10810482	10814877	-
IGDB12506	11	13148748	13151298	-
IGDB12509	11	13811037	13814736	+
IGDB12510	11	13811037	13814991	-
IGDB12512	11	13853054	13962088	+
IGDB12516	11	14082702	14088160	+
IGDB12525	11	14378099	14381284	-
IGDB12528	11	14506183	14512279	+
IGDB12576	11	16406417	16410789	-
IGDB12577	11	16412588	16416701	-
IGDB12586	11	16952226	17010753	-
IGDB12605	11	17307093	17311747	-
IGDB12668	11	19664234	19666486	-
IGDB12698	11	20953457	20955644	+
IGDB12707	11	21341262	21347103	-
IGDB12740	11	22005453	22009209	-
IGDB12755	11	22251327	22259062	-
IGDB12768	11	22681528	22685369	+
IGDB12803	11	23412324	23415847	-
IGDB12812	11	23945565	23949894	-
IGDB12854	11	26093958	26095630	-
IGDB12876	11	27954329	27957022	+
IGDB12877	11	28031965	28032600	-
IGDB12880	12	669	5382	-
IGDB12884	12	66127	127298	-
IGDB12928	12	1535590	1548859	-
IGDB12946	12	1940276	1960469	+
IGDB12966	12	2704712	2706869	+
IGDB12971	12	2866778	2868782	-
IGDB13005	12	4477748	4479986	-
IGDB13010	12	4702750	4706664	-
IGDB13019	12	5313165	5315061	+
IGDB13021	12	5451731	5455553	+
IGDB13032	12	5816830	5820529	+
IGDB13042	12	6497551	6499957	-
IGDB13043	12	6497555	6499960	+
IGDB13052	12	7491931	7494326	+
IGDB13078	12	8429507	8445699	-
IGDB13087	12	8702231	8704063	+
IGDB13089	12	8748031	8760596	+
IGDB13122	12	9867090	9891732	+
IGDB13127	12	10019108	10021923	+
IGDB13149	12	11140165	11144261	+
IGDB13161	12	12232688	12253288	-
IGDB13165	12	12291528	12295592	-
IGDB13173	12	12645084	12646545	-
IGDB13195	12	13270343	13273702	-
IGDB13211	12	13720627	13724892	-
IGDB13212	12	13720659	13724891	+
IGDB13243	12	14394784	14397691	-
IGDB13297	12	15917249	15921559	-
IGDB13312	12	16316642	16320396	+
IGDB13314	12	16563661	16566862	-
IGDB13326	12	18065129	18094113	+
IGDB13337	12	18620809	18621505	-
IGDB13339	12	18734646	18735038	-
IGDB13341	12	19221238	19225026	+
IGDB13361	12	22012969	22015643	-
IGDB13363	12	22169079	22169474	-
IGDB13371	12	24011436	24019398	+
IGDB13414	12	25860763	25863514	-
IGDB13429	12	27081608	27084317	+
IGDB13471	12	28767178	28769433	+
IGDB13475	12	28968270	28970008	+
IGDB13487	12	29504868	29507743	-
IGDB13488	12	29504872	29507745	+
IGDB13519	13	578655	580470	-
IGDB13569	13	3407886	3414764	+
IGDB13630	13	5797172	5799684	+
IGDB13633	13	6345873	6428362	-
IGDB13657	13	7428835	7431465	+
IGDB13659	13	7447302	7574704	+
IGDB13683	13	9192869	9195794	+
IGDB13718	13	11039501	11048107	+
IGDB13729	13	11654762	11661344	-
IGDB13730	13	11820410	11824006	-
IGDB13740	13	12204444	12206244	-
IGDB13795	13	15127756	15130494	-
IGDB13799	13	15228916	15233235	+
IGDB13814	13	16036834	16040525	+
IGDB13816	13	16387322	16389204	-
IGDB13819	13	16467061	16469675	-
IGDB13848	13	17128790	17140802	-
IGDB13862	13	17898164	17909025	-
IGDB13870	13	18012937	18021926	+
IGDB13906	13	19657663	19658990	+
IGDB13910	13	19752613	19760432	+
IGDB13922	13	20246812	20251813	+
IGDB13958	13	22043583	22044970	-
IGDB13980	13	23218317	23220892	-
IGDB13984	13	23555199	23566672	-
IGDB14025	13	26115876	26117588	+
IGDB14027	13	26257487	26259317	-
IGDB14034	13	26982474	26985181	-
IGDB14059	13	28121647	28134178	+
IGDB14117	13	31600096	31600476	+
IGDB14142	13	33418294	33422592	+
IGDB14149	14	92002	94258	+
IGDB14151	14	155395	160576	+
IGDB14158	14	1165121	1169952	+
IGDB14164	14	1915627	1919937	+
IGDB14192	14	3336732	3338353	+
IGDB14196	14	3369790	3377860	+
IGDB14215	14	4161684	4172285	-
IGDB14226	14	5125397	5129161	-
IGDB14238	14	6477502	6481401	+
IGDB14239	14	6477734	6481398	-
IGDB14240	14	6526194	6529034	+
IGDB14287	14	8446139	8447410	+
IGDB14302	14	8728582	8734755	-
IGDB14306	14	8773579	8775350	+
IGDB14312	14	8802611	8805173	-
IGDB14323	14	9214962	9216476	-
IGDB14336	14	10123237	10125316	-
IGDB14374	14	11512144	11514605	+
IGDB14378	14	11927715	11929777	-
IGDB14380	14	11989214	11997694	-
IGDB14381	14	12070939	12075422	-
IGDB14382	14	12070941	12075422	+
IGDB14391	14	12306410	12311747	-
IGDB14401	14	12603866	12608779	+
IGDB14413	14	12961036	12962954	-
IGDB14454	14	14000666	14005298	+
IGDB14466	14	14441102	14446630	-
IGDB14468	14	14545870	14549506	+
IGDB14496	14	15436408	15457775	-
IGDB14506	14	15671859	15680768	-
IGDB14514	14	15810480	15820227	+
IGDB14568	14	17454158	17458733	-
IGDB14573	14	17835475	17837148	-
IGDB14574	14	17837052	17842212	+
IGDB14586	14	19100788	19104209	-
IGDB14590	14	19521892	19529750	+
IGDB14612	14	20337896	20341490	+
IGDB14615	14	20539783	20547416	+
IGDB14625	14	20750966	20787061	-
IGDB14643	14	21400569	21411106	+
IGDB14661	14	22086028	22089448	-
IGDB14662	14	22386342	22389418	+
IGDB14665	14	22620753	22625654	+
IGDB14692	14	23376383	23377341	+
IGDB14707	14	23817197	23821176	+
IGDB14750	14	25609167	25615708	+
IGDB14751	14	25752665	25755417	-
IGDB14753	14	26453317	26457935	+
IGDB14765	14	27163233	27165320	-
IGDB14773	14	27357538	27359277	-
IGDB14776	14	27470092	27472271	+
IGDB14852	15	1892531	1899358	-
IGDB14859	15	2819821	2820082	-
IGDB14861	15	2974071	2976250	-
IGDB14871	15	3509859	3515637	+
IGDB14899	15	6450172	6452307	-
IGDB14909	15	6946782	6950024	-
IGDB14925	15	7512738	7513062	+
IGDB14950	15	9889614	9893694	-
IGDB14955	15	10121887	10125380	-
IGDB14959	15	10333645	10337616	+
IGDB14962	15	10465054	10467239	+
IGDB14966	15	10538632	10581400	+
IGDB14970	15	10749276	10752435	+
IGDB14985	15	11475188	11477065	-
IGDB15025	15	12943723	12948105	-
IGDB15033	15	13839544	13842977	+
IGDB15040	15	14464484	14467510	-
IGDB15047	15	14899628	14905556	-
IGDB15049	15	14969782	14972731	-
IGDB15050	15	14986942	14988630	-
IGDB15051	15	15008580	15010402	-
IGDB15058	15	15431380	15499785	-
IGDB15059	15	15468003	15470305	-
IGDB15082	15	16155420	16158082	+
IGDB15094	15	16591224	16594025	-
IGDB15131	15	18428794	18434701	-
IGDB15147	15	18786576	18790007	+
IGDB15179	15	20186235	20190392	+
IGDB15190	15	21072453	21074628	-
IGDB15194	15	21432840	21436124	-
IGDB15216	15	21971456	21973383	-
IGDB15220	15	22036896	22042714	-
IGDB15245	15	22691822	22692206	+
IGDB15248	15	22809613	22810853	+
IGDB15312	15	24444173	24465763	-
IGDB15328	15	25652324	25654446	+
IGDB15344	15	26498593	26500919	+
IGDB15400	15	28979643	28981151	-
IGDB15409	15	29133980	29180546	-
IGDB15463	16	1121379	1125626	+
IGDB15474	16	1995673	1998468	-
IGDB15487	16	3936241	3936682	+
IGDB15518	16	5465485	5479646	+
IGDB15521	16	5623080	5626342	-
IGDB15523	16	5727563	5730475	-
IGDB15539	16	6566009	6568303	-
IGDB15569	16	8170049	8174785	-
IGDB15579	16	9567725	9571188	-
IGDB15608	16	10331378	10335088	-
IGDB15622	16	10655675	10657342	+
IGDB15625	16	10859074	10939122	+
IGDB15635	16	11626411	11628282	-
IGDB15638	16	12269932	12271758	-
IGDB15646	16	13072937	13076991	-
IGDB15648	16	13101268	13104505	+
IGDB15649	16	13140648	13142781	-
IGDB15651	16	13197496	13206349	-
IGDB15652	16	13209673	13211275	+
IGDB15682	16	14513689	14518005	+
IGDB15693	16	14818540	14830294	-
IGDB15740	16	16525150	16526575	-
IGDB15746	16	16775598	16777972	-
IGDB15759	16	17159320	17165589	+
IGDB15782	16	17832301	17834288	-
IGDB15794	16	18019921	18025037	+
IGDB15813	16	18334050	18336878	-
IGDB15824	16	18595186	18598004	-
IGDB15850	16	19279552	19281051	+
IGDB15853	16	19300975	19303608	-
IGDB15854	16	19305364	19306986	-
IGDB15872	16	19505027	19508985	-
IGDB15894	16	19999917	20001848	-
IGDB15947	16	20852979	20855630	-
IGDB15952	16	21018231	21022004	+
IGDB16001	16	22825805	22836180	+
IGDB16014	16	23460653	23463096	-
IGDB16018	16	23564952	23567156	+
IGDB16022	16	23719690	23719910	+
IGDB16032	16	24092191	24096522	+
IGDB16036	16	24389199	24390918	+
IGDB16043	16	24558274	24564237	-
IGDB16044	16	24594097	24599233	-
IGDB16067	16	26131269	26134274	+
IGDB16074	16	26350612	26354563	+
IGDB16075	16	26398621	26408040	+
IGDB16082	16	26548724	26550378	+
IGDB16089	16	26911139	26914622	+
IGDB16096	16	27032926	27040479	-
IGDB16108	16	27674379	27677019	+
IGDB16110	16	27728066	27732211	+
IGDB16124	16	28581886	28584757	-
IGDB16133	16	28719572	28721792	-
IGDB16168	16	30725702	30728599	-
IGDB16169	16	30832361	30836014	-
IGDB16220	16	32597151	32599761	+
IGDB16230	17	829692	832014	+
IGDB16247	17	2931769	2934269	+
IGDB16321	17	5346588	5382862	-
IGDB16331	17	5664048	5667890	-
IGDB16350	17	6036586	6076058	-
IGDB16378	17	8098357	8100247	+
IGDB16397	17	9650359	9652628	-
IGDB16403	17	9875142	9878253	-
IGDB16404	17	9969164	9971718	-
IGDB16405	17	9979999	9983408	-
IGDB16425	17	10867634	10869775	-
IGDB16438	17	11034644	11052697	-
IGDB16457	17	11684585	11685846	-
IGDB16462	17	12480975	12482870	+
IGDB16498	17	13528439	13529995	-
IGDB16519	17	14372962	14373843	-
IGDB16521	17	14374925	14379422	-
IGDB16533	17	14751753	14756931	-
IGDB16558	17	15736754	15740372	+
IGDB16641	17	17769765	17772901	-
IGDB16646	17	17945571	17947967	+
IGDB16649	17	18340779	18343504	-
IGDB16654	17	18598909	18602681	+
IGDB16669	17	19559631	19561281	+
IGDB16677	17	20207299	20211198	-
IGDB16682	17	20697823	20699567	+
IGDB16683	17	20703713	20738373	+
IGDB16698	17	21076308	21084738	+
IGDB16710	17	21320640	21322328	+
IGDB16726	17	21864918	21867794	+
IGDB16731	17	22068178	22072310	+
IGDB16748	17	22444698	22449186	+
IGDB16765	17	22783920	22786702	-
IGDB16770	17	22840738	22861041	-
IGDB16771	17	22840744	22861052	+
IGDB16774	17	22939447	22942637	+
IGDB16776	17	22960611	22962556	-
IGDB16806	17	24131340	24146253	+
IGDB16823	17	24470329	24477883	+
IGDB16850	17	25145394	25149954	-
IGDB16863	17	25745990	25746632	-
IGDB16869	17	25976704	25980285	+
IGDB16871	17	26127406	26133719	+
IGDB16880	17	26495968	26499342	-
IGDB16902	17	27388287	27404921	+
IGDB16907	17	27632482	27634449	+
IGDB16918	17	27966577	27968819	-
IGDB16928	17	28444152	28446456	-
IGDB16932	17	28523748	28526248	-
IGDB16937	17	28742708	28745962	-
IGDB16947	17	29109733	29111624	-
IGDB16948	17	29126991	29129427	+
IGDB16959	17	29416527	29443974	-
IGDB17006	17	31097932	31098501	+
IGDB17026	18	636672	638806	-
IGDB17033	18	845370	922315	+
IGDB17046	18	1475650	1478700	-
IGDB17048	18	1496123	1498114	+
IGDB17068	18	2915488	2918922	+
IGDB17087	18	3383283	3386473	-
IGDB17121	18	5706991	5722880	+
IGDB17125	18	6028783	6031314	-
IGDB17126	18	6153291	6156733	+
IGDB17129	18	6247295	6250164	+
IGDB17131	18	6270818	6274159	-
IGDB17149	18	8970875	8973578	-
IGDB17154	18	9740744	9745062	+
IGDB17155	18	9798337	9800564	-
IGDB17156	18	10069464	10071776	+
IGDB17158	18	10259338	10261588	+
IGDB17160	18	10456476	10459764	-
IGDB17181	18	11794103	11795359	-
IGDB17194	18	12966121	12970115	-
IGDB17204	18	13138279	13139738	-
IGDB17214	18	13728796	13732452	+
IGDB17233	18	14480022	14483769	+
IGDB17238	18	14604494	14606245	+
IGDB17258	18	15653950	15659069	+
IGDB17260	18	16305196	16307449	-
IGDB17261	18	16322067	16325834	-
IGDB17262	18	16362685	16364274	+
IGDB17265	18	16375071	16377472	+
IGDB17291	18	17840696	17859669	-
IGDB17309	18	18491882	18493565	-
IGDB17330	18	19298729	19303855	-
IGDB17358	18	21316289	21329325	+
IGDB17370	18	21628770	21631317	-
IGDB17393	18	23221238	23224811	+
IGDB17407	18	26093091	26096173	+
IGDB17418	18	26431776	26433834	-
IGDB17430	18	26941586	26943436	+
IGDB17473	18	29176708	29189660	-
IGDB17475	18	29216513	29218058	-
IGDB17512	19	785721	787305	-
IGDB17525	19	1475207	1476645	+
IGDB17540	19	1836304	1838114	-
IGDB17570	19	2681088	2683116	-
IGDB17571	19	2741534	2746499	-
IGDB17575	19	2868187	2871004	+
IGDB17616	19	3924734	3926769	-
IGDB17617	19	3938691	3940875	+
IGDB17666	19	5813803	5816484	-
IGDB17671	19	6193629	6201559	-
IGDB17674	19	6557608	6557997	+
IGDB17690	19	7162058	7165470	+
IGDB17727	19	7793979	7797415	+
IGDB17749	19	8304550	8307596	-
IGDB17781	19	9304644	9306115	-
IGDB17785	19	9333293	9334434	-
IGDB17799	19	9522237	9534085	+
IGDB17805	19	9773561	9775113	+
IGDB17808	19	9823545	9856173	+
IGDB17809	19	9851906	9854979	+
IGDB17810	19	9911292	9913749	-
IGDB17811	19	9941022	9943482	-
IGDB17819	19	10213308	10215854	-
IGDB17902	19	13460119	13463465	+
IGDB17904	19	13510731	13524493	+
IGDB17905	19	13520155	13524491	-
IGDB17922	19	14586920	14714926	+
IGDB17923	19	14623890	14629481	+
IGDB17924	19	14854636	14885889	-
IGDB17926	19	14992056	14998796	-
IGDB17936	19	15775182	15777690	-
IGDB17953	19	16598088	16602038	-
IGDB17960	19	17668743	17670814	-
IGDB17967	19	17844937	17850655	+
IGDB17973	19	18381511	18456258	-
IGDB18001	19	19784723	19787584	-
IGDB18006	19	20107507	20115742	-
IGDB18019	19	21271996	21391807	-
IGDB18020	19	21321978	21325999	+
IGDB18047	19	22588252	22591797	-
IGDB18052	19	22787867	22790481	+
IGDB18069	19	23090438	23091084	-
IGDB18114	2	749002	750313	+
IGDB18132	2	1449514	1450513	-
IGDB18133	2	1449605	1456965	+
IGDB18149	2	2768879	2769727	-
IGDB18151	2	2812085	2814621	-
IGDB18152	2	2819043	2821543	-
IGDB18154	2	3468186	3471332	-
IGDB18156	2	3484917	3488521	+
IGDB18163	2	3808633	3811972	-
IGDB18164	2	3857898	3859801	+
IGDB18174	2	4613261	5320061	-
IGDB18183	2	5310441	5778437	-
IGDB18193	2	6225078	6226671	-
IGDB18196	2	6390394	6408880	+
IGDB18203	2	7087585	7101138	+
IGDB18205	2	7240818	7249623	-
IGDB18210	2	7514747	7535927	+
IGDB18217	2	8063527	8075544	+
IGDB18237	2	9144589	9146125	-
IGDB18240	2	9231830	9252645	+
IGDB18246	2	9691754	9694935	+
IGDB18258	2	10125713	10136401	-
IGDB18262	2	10217194	10220352	+
IGDB18276	2	10508329	10510728	-
IGDB18280	2	10934591	10937240	-
IGDB18303	2	11889096	11889311	+
IGDB18310	2	12569896	12573125	+
IGDB18327	2	14483311	14485230	+
IGDB18328	2	14536932	14539944	-
IGDB18329	2	14577226	14579479	+
IGDB18343	2	15387157	15392347	+
IGDB18352	2	15950093	15952503	+
IGDB18355	2	16078734	16081089	+
IGDB18399	2	19689209	19695629	+
IGDB18431	2	22747628	22749843	+
IGDB18448	2	23309211	23316022	+
IGDB18485	2	25000195	25002250	+
IGDB18493	20	847440	849425	-
IGDB18505	20	1807147	1810613	+
IGDB18509	20	2409256	2412053	-
IGDB18512	20	2575458	2577134	+
IGDB18526	20	3152613	3156724	-
IGDB18556	20	4804180	4807824	-
IGDB18573	20	6497983	6501458	+
IGDB18574	20	6583004	6587016	-
IGDB18589	20	7897250	7898434	+
IGDB18590	20	7899634	7903655	+
IGDB18601	20	9973461	9974929	+
IGDB18610	20	10364256	10368872	+
IGDB18633	20	11649816	11652442	+
IGDB18667	20	13315838	13318273	+
IGDB18687	20	14790361	14792426	+
IGDB18707	20	15860611	15863006	+
IGDB18736	20	17249358	17251881	-
IGDB18759	20	17650883	17653619	-
IGDB18771	20	17981230	17984318	-
IGDB18798	20	19063585	19066715	-
IGDB18816	20	19680398	19683890	-
IGDB18818	20	19785560	19788943	+
IGDB18824	20	20015210	20018670	-
IGDB18832	20	20183652	20184741	+
IGDB18857	20	21058857	21062477	+
IGDB18877	20	21691009	21693317	-
IGDB18899	20	23105484	23123413	+
IGDB18951	21	298042	304088	+
IGDB18952	21	489055	491319	+
IGDB18969	21	1437502	1439541	-
IGDB18990	21	3707065	3708014	-
IGDB19008	21	4313926	4316804	+
IGDB19010	21	4343709	4346211	+
IGDB19022	21	4968435	4970372	+
IGDB19033	21	5550504	5554065	+
IGDB19039	21	6219482	6223535	-
IGDB19040	21	6338044	6338439	-
IGDB19041	21	6545157	6549459	+
IGDB19062	21	7381904	7385980	+
IGDB19083	21	8631979	8653670	-
IGDB19089	21	8803952	8805841	+
IGDB19097	21	9281964	9512533	-
IGDB19150	21	11973270	11976986	+
IGDB19155	21	12140136	12142823	-
IGDB19165	21	12947649	12948855	+
IGDB19167	21	13016625	13020543	-
IGDB19170	21	13069247	13072601	-
IGDB19172	21	13128257	13129959	+
IGDB19177	21	13838285	13839089	+
IGDB19197	21	16307017	16310603	-
IGDB19210	21	16530676	16546513	+
IGDB19231	21	17656506	17658321	+
IGDB19238	21	18020388	18023056	+
IGDB19240	21	18233249	18233449	-
IGDB19249	21	18798336	18800410	+
IGDB19250	21	18902035	18906632	+
IGDB19268	21	19621811	19624220	+
IGDB19283	21	20157457	20159074	+
IGDB19300	21	20966817	20972407	+
IGDB19354	21	22543074	22545028	+
IGDB19372	21	23291865	23304026	+
IGDB19381	21	23953754	23954644	+
IGDB19385	21	23994792	23996212	+
IGDB19386	21	24038539	24043596	+
IGDB19397	21	24380179	24382255	-
IGDB19423	21	25719326	25721417	+
IGDB19478	21	29491612	29495128	-
IGDB19488	21	30298186	30302381	+
IGDB19520	22	500021	500375	+
IGDB19553	22	1464855	1472002	-
IGDB19558	22	1674097	1675202	-
IGDB19563	22	1747733	1750997	+
IGDB19568	22	1802724	1805205	-
IGDB19586	22	2311373	2313211	-
IGDB19602	22	2559440	2567722	-
IGDB19627	22	4693954	4697526	+
IGDB19636	22	4938510	4940160	+
IGDB19640	22	5116098	5118373	-
IGDB19643	22	5354018	5354747	-
IGDB19661	22	6020682	6031333	-
IGDB19668	22	6222409	6294185	+
IGDB19685	22	6903417	6905592	-
IGDB19691	22	7169005	7172721	-
IGDB19693	22	7210823	7214215	-
IGDB19697	22	7520192	7522997	+
IGDB19710	22	7983131	7991670	-
IGDB19719	22	8099669	8106600	-
IGDB19733	22	8352432	8355620	+
IGDB19752	22	9076508	9079217	-
IGDB19759	22	9189373	9189878	-
IGDB19860	22	12980644	12985280	+
IGDB19862	22	13019479	13021941	+
IGDB19908	22	14680269	14684169	-
IGDB19916	22	14889043	14890720	-
IGDB19917	22	14930208	14930932	+
IGDB19918	22	14931690	14932537	+
IGDB19940	22	15388387	15391718	-
IGDB19973	22	16888899	16911264	-
IGDB19986	22	17562839	17566717	-
IGDB19993	22	17888856	17902914	+
IGDB20000	22	18460641	18473596	-
IGDB20068	22	22472506	22474725	-
IGDB20139	22	28143307	28145966	+
IGDB20207	23	4691636	4693818	-
IGDB20224	23	6466980	6468956	+
IGDB20227	23	6549921	6555820	+
IGDB20230	23	6726081	6728572	+
IGDB20240	23	7027373	7030584	-
IGDB20242	23	7315588	7315801	+
IGDB20244	23	7320234	7328664	+
IGDB20248	23	7986893	7987145	+
IGDB20253	23	8603976	8657874	+
IGDB20276	23	9729653	9788415	+
IGDB20296	23	11058603	11060682	+
IGDB20323	23	12293030	12295316	-
IGDB20338	23	13507476	13511655	+
IGDB20344	23	13615625	13633534	-
IGDB20350	23	13739384	13750879	+
IGDB20351	23	13756544	13758264	-
IGDB20362	23	14092632	14095435	-
IGDB20378	23	14740366	14743272	-
IGDB20401	23	16255670	16259159	-
IGDB20404	23	16345416	16350003	-
IGDB20405	23	16359892	16364726	-
IGDB20410	23	16814767	16816204	+
IGDB20413	23	16902676	16908184	-
IGDB20424	23	17438913	17443521	+
IGDB20446	23	17915610	17921482	-
IGDB20449	23	18021116	18022942	-
IGDB20455	23	18725394	18728659	+
IGDB20462	23	18996085	18998944	+
IGDB20470	23	19521364	19525584	-
IGDB20477	23	19801128	19803712	+
IGDB20478	23	19990486	19993302	+
IGDB20511	23	21115330	21165687	-
IGDB20513	23	21180803	21183160	+
IGDB20517	23	21339167	21341819	+
IGDB20535	23	22859253	22871219	+
IGDB20577	23	24059724	24061119	-
IGDB20585	24	268571	274583	-
IGDB20641	24	2677886	2682040	-
IGDB20642	24	2686747	2687918	-
IGDB20643	24	2730261	2732217	+
IGDB20644	24	2881726	2885157	+
IGDB20653	24	3397877	3399114	+
IGDB20664	24	3966430	3968605	+
IGDB20668	24	4175440	4177787	+
IGDB20694	24	5379402	5381812	-
IGDB20735	24	6554027	6558795	+
IGDB20746	24	6929624	6932476	+
IGDB20784	24	8343302	8345585	+
IGDB20855	24	12030848	12033512	-
IGDB20856	24	12037890	12041330	-
IGDB20873	24	12895617	12898250	-
IGDB20883	24	13202280	13204666	-
IGDB20887	24	13336238	13354153	+
IGDB20968	24	16029815	16031434	+
IGDB20980	24	16616839	16620334	+
IGDB20981	24	16618290	16620338	-
IGDB21043	24	19153549	19154386	-
IGDB21127	24	23065268	23065775	+
IGDB21166	3	854178	857318	-
IGDB21173	3	1581180	1583547	-
IGDB21179	3	2179720	2184238	-
IGDB21233	3	7345033	7534145	+
IGDB21235	3	7529922	7534147	-
IGDB21241	3	8289603	8293939	-
IGDB21243	3	8609217	8611379	+
IGDB21256	3	9912753	9916732	+
IGDB21274	3	10737723	10740566	-
IGDB21281	3	11267923	11272333	+
IGDB21328	3	13682813	13689319	+
IGDB21364	3	14694860	14699517	-
IGDB21371	3	15036887	15039383	+
IGDB21372	3	15102851	15105499	+
IGDB21376	3	15705722	15708329	-
IGDB21377	3	16016575	16019699	-
IGDB21379	3	16027097	16028771	-
IGDB21400	3	17169776	17174746	+
IGDB21436	3	18122039	18123903	-
IGDB21443	3	18350747	18355002	-
IGDB21444	3	18352479	18355002	+
IGDB21448	3	18501439	18503848	-
IGDB21454	3	18863644	18866532	+
IGDB21456	3	18878091	18881451	-
IGDB21458	3	18924550	18941884	+
IGDB21460	3	18966624	18974360	-
IGDB21467	3	19424857	19428019	-
IGDB21471	3	19774981	19778178	+
IGDB21484	3	20236101	20237978	+
IGDB21514	3	21507645	21523520	-
IGDB21538	3	21976866	21978615	-
IGDB21545	3	22134935	22146258	-
IGDB21561	3	23200064	23202991	+
IGDB21590	3	24443565	24449619	-
IGDB21621	3	25285987	25287560	-
IGDB21629	3	25697235	25704866	+
IGDB21648	3	26637009	26645636	+
IGDB21685	3	28624373	28637521	-
IGDB21693	3	29155504	29160806	+
IGDB21701	3	29859481	29862288	-
IGDB21743	3	32405366	32408693	-
IGDB21770	3	35416821	35419562	-
IGDB21827	4	1102715	1104336	-
IGDB21842	4	1580371	1583468	+
IGDB21856	4	2255933	2287810	-
IGDB21860	4	2528871	2530920	+
IGDB21862	4	2608199	2611399	+
IGDB21923	4	5394775	5397738	-
IGDB21924	4	5402915	5417744	+
IGDB21997	4	8337523	8340041	+
IGDB22029	4	9431618	9433915	-
IGDB22041	4	11039277	11041466	+
IGDB22042	4	11123838	11127429	-
IGDB22047	4	11267895	11272901	-
IGDB22048	4	11336744	11340529	+
IGDB22050	4	11552762	11575770	+
IGDB22058	4	12073690	12076199	-
IGDB22066	4	12563386	12566818	-
IGDB22074	4	12833773	12837349	+
IGDB22107	4	13680188	13684757	+
IGDB22108	4	13717226	13719620	-
IGDB22109	4	13735587	13738689	-
IGDB22140	4	14779039	14780654	+
IGDB22145	4	14922383	14924434	+
IGDB22156	4	15260730	15262904	-
IGDB22170	4	15919710	15921285	+
IGDB22181	4	16648927	16650893	-
IGDB22182	4	16653849	16656157	-
IGDB22191	4	17226269	17228711	-
IGDB22222	4	18563051	18606345	-
IGDB22223	4	18577015	18581271	+
IGDB22225	4	18600657	18602869	+
IGDB22249	4	19695866	19697893	-
IGDB22272	4	21277654	21280063	-
IGDB22293	4	22309530	22313563	-
IGDB22305	4	23778644	23781075	-
IGDB22332	4	24590491	24594818	-
IGDB22349	4	25126959	25130635	-
IGDB22351	4	25649387	25658763	+
IGDB22353	4	25795700	25798900	-
IGDB22354	4	25847406	25849934	-
IGDB22355	4	25984122	25986216	-
IGDB22356	4	25990904	25994654	+
IGDB22357	4	26071231	26074111	-
IGDB22378	4	26671926	26677088	+
IGDB22384	4	26759468	26764561	+
IGDB22408	4	27148015	27149368	+
IGDB22410	4	27205097	27207833	-
IGDB22421	4	27767658	27772788	-
IGDB22423	4	28061487	28068794	+
IGDB22432	4	28219052	28224782	-
IGDB22440	4	28311991	28314058	-
IGDB22446	4	28372464	28375158	+
IGDB22506	4	30680099	30686059	-
IGDB22522	4	31676036	31680962	+
IGDB22523	4	31718393	31732584	-
IGDB22546	5	484088	497564	+
IGDB22613	5	2772590	2776262	-
IGDB22614	5	2788492	2790206	-
IGDB22622	5	3120058	3123022	-
IGDB22634	5	3656048	3660917	+
IGDB22638	5	3776527	3785032	-
IGDB22652	5	4020358	4029612	-
IGDB22685	5	5069413	5071665	+
IGDB22691	5	5272793	5274328	+
IGDB22699	5	5697143	5700658	-
IGDB22711	5	6537722	6540662	-
IGDB22716	5	6761706	6778929	+
IGDB22719	5	6973174	6975479	+
IGDB22739	5	7687590	7690989	+
IGDB22745	5	7826273	7831862	-
IGDB22776	5	8770625	8773031	+
IGDB22788	5	9269005	9292274	-
IGDB22810	5	10301870	10305552	-
IGDB22812	5	10307091	10308200	+
IGDB22825	5	10846129	10847762	+
IGDB22826	5	10879844	10882781	-
IGDB22829	5	11277710	11280065	+
IGDB22831	5	11297433	11299952	-
IGDB22836	5	11374378	11404497	-
IGDB22860	5	12904943	12915691	+
IGDB22874	5	13486776	13491512	-
IGDB22912	5	15190560	15194055	-
IGDB22926	5	15866840	15878164	+
IGDB22932	5	16375455	16376675	-
IGDB22934	5	16517880	16526132	-
IGDB22945	5	17115110	17119976	+
IGDB22970	5	18076326	18077988	-
IGDB22995	5	19405877	19408752	-
IGDB22998	5	19451210	19455702	-
IGDB23022	5	20996419	21309337	+
IGDB23026	5	21686838	21689687	-
IGDB23037	5	22313481	22316459	+
IGDB23054	5	23674379	23677381	+
IGDB23056	5	23911158	23915111	-
IGDB23061	5	24421329	24434158	+
IGDB23103	5	26212719	26216299	-
IGDB23107	5	26269254	26272255	-
IGDB23132	5	26994666	27001495	+
IGDB23179	5	28126026	28129835	+
IGDB23205	5	29073731	29077364	-
IGDB23221	5	29607867	29613060	-
IGDB23272	5	31500514	31503690	-
IGDB23274	5	31572822	31799035	+
IGDB23294	5	32736259	32740397	-
IGDB23323	6	1611717	1767965	+
IGDB23332	6	2469125	2479512	-
IGDB23340	6	3034189	3036669	-
IGDB23368	6	4652110	4654335	+
IGDB23384	6	5492259	5501012	+
IGDB23385	6	5499733	5503522	-
IGDB23386	6	5503318	5504604	+
IGDB23387	6	5518779	5519528	+
IGDB23406	6	5870460	5872950	-
IGDB23408	6	5920914	5922552	-
IGDB23413	6	6274150	6274360	+
IGDB23416	6	6348171	6350627	-
IGDB23428	6	6736089	6740225	-
IGDB23448	6	8057207	8061862	+
IGDB23486	6	10075270	10077289	-
IGDB23491	6	10401896	10404409	+
IGDB23529	6	12236487	12245527	+
IGDB23536	6	12655585	12658033	+
IGDB23537	6	12699754	12704685	-
IGDB23538	6	12700195	12704685	+
IGDB23544	6	12997823	12999575	+
IGDB23584	6	14374664	14376588	+
IGDB23589	6	14684713	14703605	-
IGDB23612	6	15260994	15262046	-
IGDB23636	6	15606695	15608078	-
IGDB23647	6	15777372	15783899	+
IGDB23655	6	15897464	15900451	+
IGDB23656	6	15962643	15964703	+
IGDB23680	6	16594139	16596723	-
IGDB23703	6	17007257	17021220	-
IGDB23712	6	17525495	17527565	+
IGDB23727	6	17780082	17782159	-
IGDB23745	6	18569930	18573763	-
IGDB23747	6	18605656	18607819	-
IGDB23782	6	20005599	20007705	+
IGDB23820	6	21361715	21365733	-
IGDB23838	6	21797479	21799294	-
IGDB23839	6	21797480	21799246	+
IGDB23855	6	22924353	22927151	+
IGDB23875	6	24058502	24062681	+
IGDB23880	6	24247506	24256685	+
IGDB23906	6	25922963	25929713	-
IGDB23970	6	27576342	27577999	-
IGDB24005	6	29146112	29155195	-
IGDB24026	6	30227224	30229736	-
IGDB24027	6	30274979	30277221	-
IGDB24130	7	2447836	2450515	+
IGDB24135	7	3123160	3126443	+
IGDB24137	7	3216570	3219219	-
IGDB24186	7	5124389	5127199	-
IGDB24192	7	5400578	5404750	+
IGDB24194	7	5407898	5410507	-
IGDB24198	7	5676591	5680675	-
IGDB24209	7	5979303	5981411	-
IGDB24212	7	6093901	6099866	-
IGDB24217	7	6252685	6258661	-
IGDB24234	7	7039918	7040181	-
IGDB24250	7	7415687	7443880	+
IGDB24273	7	7862836	7865035	-
IGDB24285	7	8631634	8633715	-
IGDB24288	7	8649223	8657339	+
IGDB24305	7	9191818	9193359	+
IGDB24312	7	9659713	9661925	-
IGDB24327	7	10379545	10382098	-
IGDB24328	7	10457755	10459421	-
IGDB24349	7	10739226	10747095	-
IGDB24351	7	10752785	10754754	-
IGDB24354	7	10813374	10815096	+
IGDB24360	7	10962530	10962926	+
IGDB24375	7	11297751	11299066	-
IGDB24393	7	11758194	11763549	+
IGDB24396	7	11823143	11826213	-
IGDB24409	7	12172092	12174660	-
IGDB24420	7	12396691	12397437	+
IGDB24429	7	12634485	12644984	+
IGDB24434	7	12750056	12753510	+
IGDB24448	7	13304927	13308002	+
IGDB24454	7	13449099	13452692	+
IGDB24473	7	14192564	14195388	+
IGDB24477	7	14443590	14447238	+
IGDB24481	7	14596870	14611474	-
IGDB24562	7	17708897	17717684	-
IGDB24576	7	18821668	18829504	-
IGDB24582	7	18907461	18909483	-
IGDB24584	7	18992641	19013989	-
IGDB24594	7	19138128	19139687	+
IGDB24640	7	20585824	20596468	+
IGDB24677	7	21604886	21606897	-
IGDB24679	7	21617805	21638027	+
IGDB24686	7	21767326	21771804	-
IGDB24687	7	21767326	21771809	+
IGDB24696	7	21963304	21965697	-
IGDB24722	7	22858504	22861095	-
IGDB24724	7	23010459	23012900	-
IGDB24725	7	23058856	23062481	+
IGDB24730	7	23431116	23435615	-
IGDB24748	7	24601157	24602380	-
IGDB24764	7	25549815	25552317	-
IGDB24767	7	25728450	25733071	+
IGDB24802	7	27571311	27574042	+
IGDB24807	7	28405996	28408906	-
IGDB24817	7	28717211	28719639	-
IGDB24831	7	29502175	29517430	-
IGDB24832	7	29519527	29525464	+
IGDB24835	7	29585060	29587789	-
IGDB24883	7	31959672	31962368	-
IGDB24913	8	176139	178692	+
IGDB24921	8	380496	382777	+
IGDB24940	8	722500	724077	-
IGDB24949	8	891678	896012	-
IGDB24961	8	1164018	1170297	+
IGDB24964	8	1296128	1298955	+
IGDB24996	8	2757968	2761360	+
IGDB25018	8	3542176	3545202	+
IGDB25023	8	3791448	3793731	+
IGDB25044	8	4143016	4144578	+
IGDB25057	8	4611814	4613869	+
IGDB25062	8	4696064	4696452	-
IGDB25077	8	5394648	5400891	+
IGDB25092	8	5767892	5770812	+
IGDB25113	8	6324538	6326531	-
IGDB25132	8	6897023	6899488	+
IGDB25142	8	6995675	7001151	-
IGDB25161	8	7709439	7710788	-
IGDB25162	8	7709446	7710788	+
IGDB25163	8	7816457	7817372	+
IGDB25165	8	8010727	8014833	+
IGDB25167	8	8016628	8020960	+
IGDB25179	8	8243379	8252265	+
IGDB25182	8	8302104	8305809	+
IGDB25185	8	8337212	8340695	+
IGDB25192	8	8396467	8435810	+
IGDB25194	8	8434228	8442142	-
IGDB25208	8	8910088	8916626	-
IGDB25255	8	9897503	9900777	-
IGDB25257	8	9996738	9997136	+
IGDB25268	8	10211831	10216487	+
IGDB25283	8	10755082	10757126	+
IGDB25290	8	11029125	11032256	-
IGDB25301	8	11150528	11168403	+
IGDB25304	8	11214859	11216683	-
IGDB25331	8	11730643	11735393	+
IGDB25335	8	11886686	11889552	-
IGDB25371	8	13097091	13100375	-
IGDB25372	8	13144112	13147607	-
IGDB25375	8	13154662	13156578	-
IGDB25384	8	13268465	13271022	+
IGDB25386	8	13286062	13289777	-
IGDB25391	8	13436723	13439568	-
IGDB25396	8	13535254	13537054	-
IGDB25402	8	14187839	14191352	+
IGDB25424	8	14556330	14558667	-
IGDB25431	8	15034341	15035087	+
IGDB25446	8	15344805	15349003	-
IGDB25457	8	15822419	15838428	-
IGDB25462	8	16700740	16706552	+
IGDB25465	8	16871632	16874039	+
IGDB25473	8	17773294	17777045	+
IGDB25475	8	17781845	17788988	-
IGDB25481	8	17909772	17912560	-
IGDB25514	8	19287227	19293560	+
IGDB25522	8	19352632	19354414	+
IGDB25531	8	19469844	19480184	+
IGDB25537	8	19616629	19618056	+
IGDB25561	8	20253983	20255958	+
IGDB25568	8	20418856	20420403	+
IGDB25601	8	21504850	21531510	-
IGDB25603	8	21527710	21531508	+
IGDB25622	8	22251923	22253288	-
IGDB25659	8	23870182	23874770	-
IGDB25661	8	23937645	23946026	+
IGDB25670	8	24211861	24215273	-
IGDB25676	8	24424489	24429021	-
IGDB25735	9	1	3398	-
IGDB25757	9	831391	833202	+
IGDB25841	9	5458874	5462850	-
IGDB25889	9	6666945	6670500	-
IGDB25960	9	9497745	9499302	-
IGDB25962	9	9508603	9511257	+
IGDB25999	9	11448680	11450963	-
IGDB26000	9	11462225	11464985	-
IGDB26020	9	12140565	12144798	+
IGDB26022	9	12170685	12171109	+
IGDB26025	9	12194034	12198354	-
IGDB26086	9	13424962	13430626	-
IGDB26119	9	14000958	14008860	+
IGDB26136	9	14827229	14861845	-
IGDB26137	9	14848083	14861807	+
IGDB26138	9	14868202	14870758	-
IGDB26147	9	15282319	15284809	+
IGDB26148	9	15610256	15616669	-
IGDB26150	9	15630732	15632431	+
IGDB26153	9	15892660	15895513	-
IGDB26156	9	16064920	16065321	+
IGDB26157	9	16072492	16073663	+
IGDB26179	9	16738882	16747200	-
IGDB26183	9	16847234	16851641	+
IGDB26208	9	17526070	17532804	+
IGDB26209	9	17528622	17532801	-
IGDB26212	9	17826710	17840983	+
IGDB26215	9	18067235	18070685	+
IGDB26246	9	18862354	18866685	-
IGDB26263	9	19400361	19441514	-
IGDB26264	9	19444286	19465673	-
IGDB26265	9	19500385	19503929	-
IGDB26274	9	20142191	20228987	-
IGDB26277	9	20224116	20228880	+
IGDB26302	9	21295380	21299290	+
IGDB26322	9	21766665	21768452	+
IGDB26324	9	21965994	21969966	-
IGDB26325	9	21965995	21969951	+
IGDB26331	9	23039657	23064948	+
IGDB26351	9	24685062	24691493	+
IGDB26382	9	25547441	25549702	+
IGDB26411	9	27281959	27283913	+
IGDB26413	9	27389343	27421654	+
IGDB26417	9	27876931	27879554	+
IGDB26418	9	27885893	27889852	-
IGDB26419	9	27890952	27893698	+
IGDB26444	9	28665954	28668766	+
IGDB26504	9	31453641	31467121	-
IGDB26512	9	31557961	31591945	-
IGDB26517	9	31641279	31645911	-
IGDB26535	9	32749585	32751817	+
IGDB26539	9	32830968	32836311	+
IGDB26548	9	33397059	33398818	-
