# Supplementary material for: Dynamic transcriptional and chromatin accessibility landscape of medaka embryogenesis
Source: Genome Res. 2020 Jun;30(6):924–37. doi: 10.1101/gr.258871.119 (PMC7370878; doi:10.1101/gr.258871.119)
Supplement: Supplemental Material [file supp_gr.258871.119_Supplemental_Table_S4.xlsx]

## Sheet: sheet1
Supplemental Table S4 : Genes with isoform switching events during embryogenesis.
igdb_gid	igdb_tid	st06	st11	st15	st19	st25	st29	st32	st36	st38	st40	st41
IGDB00002	IGDB00002.1	0	18.6007	11.5969	13.6767	5.1268	7.4873	0	11.0629	10.4043	9.05389	5.37466
IGDB00002	IGDB00002.2	20.8321	3.00061	9.34845	26.2377	44.873	44.0449	49.4929	33.9285	26.3854	26.0813	30.9538
IGDB00002	IGDB00002.3	0	0	0.007429	0.069428	0.702541	2.49409	8.05297	16.9223	8.47964	2.55864	1.19399
IGDB00037	IGDB00037.1	0.0551165	0.523807	1.03314	0.542365	2.1437	4.23122	5.58321	12.1359	8.06358	6.76699	1.86772
IGDB00037	IGDB00037.2	0	0	0	0	0	0	0	0	0	0	0
IGDB00037	IGDB00037.3	5.46086	6.93377	10.2109	4.54009	4.25682	3.14214	2.02985	1.79899	0.970591	1.01698	1.212
IGDB00037	IGDB00037.4	0	0	0.246542	0	0.119782	0.0655795	0.0865285	0.074224	0.036105	0	0.0243465
IGDB00057	IGDB00057.1	0.880234	0.811904	0.014091	0.027048	0.195991	0.209018	0.302555	0.476423	1.23045	0.628788	0.313989
IGDB00057	IGDB00057.2	0.355175	0.162458	0.0177285	0.0616025	0.391759	0.263197	0.339572	0.366393	1.38029	0.645749	0.711686
IGDB00082	IGDB00082.1	1.49863	2.34189	0	0	1.47082	6.47405	3.04179	1.11333	4.08865	7.3146	0.335703
IGDB00082	IGDB00082.2	2.74762	0.482714	0.0222825	0.287023	0.553604	0.843693	3.49945	5.73576	2.65159	2.60846	0.333381
IGDB00085	IGDB00085.1	0	0.501243	13.48	0.118393	2.20322	0.0339465	0.015727	0.08038	3.67899	2.9959	1.14254
IGDB00085	IGDB00085.2	0.0850475	0.0571945	0.559653	0.0344295	0.323451	0	0.01025	0.0129295	0.726954	0.284363	1.07296
IGDB00120	IGDB00120.1	0	0	0	0	0	0	0	0	0	0	0
IGDB00120	IGDB00120.2	0.333174	0.214679	0	0	0	0	0	0.564821	1.82598	1.54893	0.475257
IGDB00120	IGDB00120.3	0.226468	0.020055	0.0244035	0.024917	0.0264	0	0	0.338104	1.25256	0.56782	0.508108
IGDB00142	IGDB00142.1	0.033159	0.0009515	0	0.610371	5.68165	0	1.28278	0	0.391716	0	0
IGDB00142	IGDB00142.2	0	1.7e-05	0	0.393431	0	0.110907	0.442865	0.084535	0.048239	0.064891	0.093404
IGDB00142	IGDB00142.3	24.066	38.813	4.84029	22.428	8.48672	22.232	13.3988	9.46063	7.10315	2.84704	5.75349
IGDB00142	IGDB00142.4	0.391929	0.405836	0.144097	0	23.2925	9.12145	9.47766	7.67711	0	4.05472	0
IGDB00156	IGDB00156.1	0	0.008382	0.008288	0.027803	0.684041	0.683566	0.139779	0.326769	0.495561	0.0901575	0.248416
IGDB00156	IGDB00156.2	0.031253	0.007055	0.0721935	0.163102	0.952653	1.21682	0.728017	0.469459	0.789308	0.57457	0.469228
IGDB00156	IGDB00156.3	0	0.060651	0.118557	0.176888	2.40082	0.989094	1.75988	1.42262	0.741472	1.50505	3.2357
IGDB00168	IGDB00168.1	0.010336	0.235321	1.14678	0.472213	0.245468	0.056055	0.0476195	0.26166	0.0297895	0.114317	0.030878
IGDB00168	IGDB00168.2	2.03439	3.0366	21.653	8.963	6.61351	4.84341	3.47791	1.68725	0.924585	1.39264	0.460817
IGDB00168	IGDB00168.3	0.940241	1.99594	21.6484	9.23798	5.57468	6.69828	5.86065	5.06293	3.71091	1.97292	1.08995
IGDB00182	IGDB00182.1	0	0	0.11511	0.611716	0.522699	0.166587	0	1.45178	1.29392	0.511449	1.34727
IGDB00182	IGDB00182.2	8.23078	2.82102	0	0	0.699092	0.625888	0.262908	1.3506	1.43416	0.938984	2.08882
IGDB00182	IGDB00182.3	0	0.0047515	0	0	0	1.28939	2.5894	1.4087	1.28682	2.0854	1.56823
IGDB00182	IGDB00182.4	0	0	0	0	0	0	0	0	0	0	0
IGDB00212	IGDB00212.1	1.33405	0.790284	0.094754	2.77024	3.74542	3.18699	0.974166	1.63559	1.82781	2.77443	2.30553
IGDB00212	IGDB00212.2	0	0	0	0.747718	3.81679	5.35529	4.38671	3.19976	1.78819	0.696047	0.429326
IGDB00212	IGDB00212.3	0	0	0	0	0	0	0	0	0	0	0.0156225
IGDB00218	IGDB00218.1	0.0665775	0.153032	0.59119	0.159691	0.216452	0.190526	0.599111	2.71664	2.21389	1.6537	0.536061
IGDB00218	IGDB00218.2	0.0053905	0.104081	1.83475	0.0302305	0.011208	0.121726	0.765588	3.58326	5.5488	4.2784	0.87177
IGDB00233	IGDB00233.1	0	0.0696105	0.149162	0.133913	0.275271	0.409917	0.384185	0.350402	3.0989	0.791002	1.0088
IGDB00233	IGDB00233.2	0	0	0	0.019648	0.228974	1.33577	3.72625	14.5092	198.83	70.9841	175.912
IGDB00243	IGDB00243.1	3.19908	2.96456	3.87562	10.6588	8.81766	8.50623	8.46941	6.99066	3.58857	4.28352	4.61155
IGDB00243	IGDB00243.2	0	0	16.6944	1.79763	4.82262	0	0	0	2.51885	0	0
IGDB00269	IGDB00269.1	0	0	0.426897	0	0	0.032742	0.061403	0.114587	0.377467	0.687265	1.97557
IGDB00269	IGDB00269.2	0	0	0	0	0	0	0	0	1.47636	0.931384	0
IGDB00307	IGDB00307.1	3.69731	1.86638	0.51441	0.709927	0.34671	0.947546	1.18674	1.37854	1.21699	1.23793	0.641017
IGDB00307	IGDB00307.2	0	0.605055	0.38687	0	0.755722	0.800254	0.762692	0.630964	1.01336	0.797734	0.274618
IGDB00339	IGDB00339.1	0.0104575	0.028157	0.08588	0.0503015	0.0635755	0.148404	0.334129	1.66556	1.64099	0.974877	0.652196
IGDB00339	IGDB00339.2	0	0	0.223191	0.00011	0.01309	0.014836	0.447171	1.80721	8.76505	4.92985	3.78976
IGDB00354	IGDB00354.1	5.20272	5.09992	0.230007	0	0	0	0.681515	3.2626	1.58285	2.93276	0.150603
IGDB00354	IGDB00354.2	0	0.72914	0.001851	0.005096	0.0128495	1.09293	2.57102	4.28244	4.0967	2.69682	0.58209
IGDB00354	IGDB00354.3	0	0	23.0015	26.8821	28.9503	22.032	26.4959	19.6286	14.3538	14.2085	10.4668
IGDB00354	IGDB00354.4	0	6.35933	0.654184	4.1284	8.05267	7.93578	5.13784	5.07885	1.9607	3.19713	4.34818
IGDB00354	IGDB00354.5	1.64132	0	0	0	0	4.60877	3.57327	4.49457	1.47949	2.17942	1.42109
IGDB00365	IGDB00365.1	0.096847	0.183362	0.172681	0.020945	0.297227	0.143162	0.065801	0.384406	0.580056	1.3245	1.1355
IGDB00365	IGDB00365.2	0.104176	0	0.404035	0.17643	0.604017	2.1683	1.31153	2.72553	9.43865	18.0419	14.0027
IGDB00455	IGDB00455.1	0	0	0.039735	0.153485	3.63073	3.41252	2.9069	2.16707	1.21673	1.14084	2.60708
IGDB00455	IGDB00455.2	0	0	0.0944745	0.0198615	1.68016	1.01985	1.27245	1.1386	0.636077	0.960047	1.31047
IGDB00480	IGDB00480.1	0	0	0	0	0.333479	5.01454	6.07161	9.87687	3.89247	2.79825	0.998843
IGDB00480	IGDB00480.2	0	0	0	0.021111	0.334983	1.24934	1.88783	1.6065	2.0525	0.633494	0.231079
IGDB00496	IGDB00496.1	0.025299	0.077715	0.089399	0.181093	0.53633	0.450746	0.38312	1.06152	1.30576	0.985287	0.396981
IGDB00496	IGDB00496.2	0	0.288474	0	0.278375	0.151836	0.490295	0.881795	0.910043	1.02171	0.772132	0.494742
IGDB00496	IGDB00496.3	0	0	0	0	0	0	0	0	0	0	0
IGDB00509	IGDB00509.1	0.054958	0.020929	0.190478	1.11253	0.0054275	0.00762	0.707078	0.010242	0.0180165	0.009403	0.046634
IGDB00509	IGDB00509.2	0.0021465	2.59733	49.7199	4.36979	3.76363	1.95564	1.09014	2.75712	4.42615	4.22824	13.7417
IGDB00513	IGDB00513.1	1.86424	1.00617	0.835807	1.61848	3.20498	4.3973	1.83351	2.14288	2.01671	3.84674	1.88709
IGDB00513	IGDB00513.2	2.96747	1.60483	1.54026	2.80556	4.03869	4.85034	4.59265	2.94618	4.49467	3.99999	1.71195
IGDB00513	IGDB00513.3	0	0.355671	6.8813	6.51013	7.70408	3.66777	9.56311	9.01363	4.65011	1.89399	3.35714
IGDB00513	IGDB00513.4	0.027622	0.0159865	0.230842	0.110133	0.488781	0.17617	0.549297	0.0676005	0.65754	0.431144	0.203861
IGDB00569	IGDB00569.1	1.42624	1.84601	0.88902	9.33376	14.577	13.9628	15.6898	14.8631	12.0381	14.6285	15.0813
IGDB00569	IGDB00569.2	4.77342	7.80024	2.71383	2.68814	7.02261	25.8063	32.1129	45.7982	36.2921	18.7328	8.85639
IGDB00578	IGDB00578.1	0.11583	0.114589	0.0413125	0.038528	0.317999	1.83	2.14785	5.92303	6.43763	4.21179	1.35575
IGDB00578	IGDB00578.2	0	0	0	0	0	0	0	5e-07	0	0	0
IGDB00578	IGDB00578.3	0	0	0	0	0	2.33898	7.9074	21.4899	20.5972	12.0562	4.16265
IGDB00581	IGDB00581.1	0.0077515	0.171235	0.0289815	0.781408	0.966341	2.63484	3.00656	4.08213	3.7448	5.61851	1.96659
IGDB00581	IGDB00581.2	0.0008135	0	0	0.548041	2.37853	5.2321	5.91317	6.5903	9.78002	12.4279	2.63889
IGDB00592	IGDB00592.1	0.291038	1.30077	0.245852	3.15293	9.64644	18.7486	19.0456	11.315	7.59331	4.83033	1.87307
IGDB00592	IGDB00592.2	0.729353	0.950442	0.268695	0.915778	1.16128	2.95431	2.02289	3.25744	1.88095	2.12122	1.58806
IGDB00592	IGDB00592.3	0	0.05969	0.026543	0	0.0647845	0.05748	0.109957	0.226055	0.0824755	0	0.006608
IGDB00592	IGDB00592.4	0	0	0	0	0	0	0	0	0	0	0
IGDB00606	IGDB00606.1	0.126258	0.10919	0.110226	1.62443	5.92158	2.28745	5.29636	21.8171	41.4753	29.0464	7.10218
IGDB00606	IGDB00606.2	0.058148	0.0419485	0.173274	1.24601	1.46836	3.68459	2.7543	1.92503	4.62863	1.73093	1.89197
IGDB00609	IGDB00609.1	0	0.130907	0.0349185	2.69021	5.70118	7.3197	10.4576	4.87287	7.33586	10.3158	7.74057
IGDB00609	IGDB00609.2	0	0.07487	0	0.301366	0.837164	0	0.339672	5.67133	0.402137	1.28522	0.702194
IGDB00609	IGDB00609.3	0.0225195	0.0928815	0.223334	0	0	0	0	0	0.713095	0.471667	0
IGDB00609	IGDB00609.4	0.094802	0	0	2.20888	1.07711	1.295	1.1316	1.01829	1.10559	0.764436	1.6063
IGDB00609	IGDB00609.5	0	0	0	0	4.23122	2.51113	0.839472	2.20045	2.7129	1.14741	3.07546
IGDB00609	IGDB00609.6	0	0	0	0.476892	0.440141	0.487096	0.806539	0.47687	0.313651	0.627616	2.20394
IGDB00616	IGDB00616.1	0	0.653598	0.298316	0	0.025533	0.103932	0.24112	0.21787	0	0	0
IGDB00616	IGDB00616.2	0	0	0	0	0	0	0	0.517852	3.40757	3.59597	1.52345
IGDB00616	IGDB00616.3	6.09813	5.74265	0.0770705	0.0269685	0.122329	0.03131	0	0.287464	0.908444	0	0.7407
IGDB00616	IGDB00616.4	1.27761	0	0.071839	0	0	0	0.107323	0	0.0267675	0.085165	1.12095
IGDB00618	IGDB00618.1	0.025484	0.052645	0	0.216204	0.567579	1.77505	0.124333	0.118716	3.28664	0.0549215	3.17144
IGDB00618	IGDB00618.2	0	0	0	0	0	0	5.08066	8.27562	6.11491	10.7404	0
IGDB00620	IGDB00620.1	0.875934	0.646675	1.49506	1.9514	4.77115	11.3834	18.3513	16.4427	8.81053	6.3423	2.93085
IGDB00620	IGDB00620.2	2.97814	3.8296	1.00688	0.594934	2.45302	7.16219	10.4555	9.0888	4.2146	2.92772	0.930435
IGDB00639	IGDB00639.1	0	0.194243	0	0	1.38519	0.060119	0.006265	0	0.011409	0	1.17559
IGDB00639	IGDB00639.2	0.0844795	0.00608	0.0461945	0.770795	0.562769	1.24608	2.71266	9.03964	5.11446	1.3988	1.33868
IGDB00639	IGDB00639.3	0	0	0	0	0	1.42214	2.46427	0.893815	1.79406	1.21067	0.0691905
IGDB00639	IGDB00639.4	0	0	0	0	0	3.96242	3.00756	4.33419	3.57895	3.1285	0.047142
IGDB00639	IGDB00639.5	0	0	0	0	0	1.17196	4.95668	1.6903	0	0.51925	0
IGDB00657	IGDB00657.1	0.0038575	0.008355	0.037454	0.015206	0	0	1.30064	0.94965	1.73721	2.06119	0.848896
IGDB00657	IGDB00657.2	0	0	0	0	0	0	0	0	0	0.575585	0.5688
IGDB00657	IGDB00657.3	1.84533	0.912652	0	0.506537	2.93021	2.39499	3.99007	2.97943	1.41449	1.83566	0.750302
IGDB00657	IGDB00657.4	0.312022	0.199193	0	0.445184	0	7.23289	3.30354	4.13982	4.70208	1.5049	0.337597
IGDB00657	IGDB00657.5	2.56035	0.527428	0.0086	0.0332535	0.597197	0.963376	1.78875	1.89041	1.71312	1.33616	0.205636
IGDB00657	IGDB00657.6	0.173817	0.287467	0.155716	0.44175	2.58149	1.33899	5.88164	5.19195	3.58844	3.23082	2.51134
IGDB00726	IGDB00726.1	0	0	0.109275	0.144397	0.806557	2.61464	2.96667	2.68706	7.87077	6.23111	0.801763
IGDB00726	IGDB00726.2	0	0	0	0	1.09211	3.1914	7.0436	7.68489	11.352	13.9127	3.07462
IGDB00752	IGDB00752.1	3.31527	1.84051	1.84441	0.611233	0.927962	1.53795	0.80214	1.65998	1.30924	1.21498	1.30097
IGDB00752	IGDB00752.2	0.0112855	0.0146555	0.005651	0.0237845	0.035616	0.008288	0.0092155	0.007156	0.006473	0.002936	0.011665
IGDB00752	IGDB00752.3	46.1465	22.8971	0	5.59086	6.15033	3.66224	5.64745	2.73854	1.21424	2.82118	2.60977
IGDB00771	IGDB00771.1	5.21066	8.33984	0.3884	0.524482	0.185477	0.216328	0.540235	0.999517	0.480371	0.264689	0.59439
IGDB00771	IGDB00771.2	45.2261	25.8397	0.49531	1.66832	0.709436	0.796146	0.935196	0	0.562068	0.138257	0.57086
IGDB00781	IGDB00781.1	26.4875	7.06946	0.969547	2.29315	3.75367	7.50687	5.89844	6.93101	9.17447	5.1402	5.35377
IGDB00781	IGDB00781.2	0.0264275	0.0361595	0.016809	0.08749	0.243473	0.333317	0.429474	0.47271	0.709386	0.0255865	0.140158
IGDB00781	IGDB00781.3	44.9974	15.5105	0.906686	2.45551	4.53549	3.99844	6.32116	6.93244	6.39354	4.62882	5.99361
IGDB00781	IGDB00781.4	0.021631	0	0	0.0155955	0.002947	0.0011075	0	0	0.00691	0	0.0245685
IGDB00894	IGDB00894.1	0	1.05563	0.155642	0.546436	0.663238	0.0505985	0.116966	0.061123	0.356924	0.098862	0.0950435
IGDB00894	IGDB00894.2	0	0	0.0136925	0	0	0	0.0038095	0.714603	0.6719	1.10816	3.39289
IGDB00905	IGDB00905.1	0	0.011935	0.262369	0.100305	0.112837	0.174651	0.0883545	0.111136	0.228528	0.596484	1.0725
IGDB00905	IGDB00905.2	0	0.0039255	0.210474	0.848907	0.173677	0.251717	0.261443	0.837292	5.45132	2.11724	6.7755
IGDB00912	IGDB00912.1	0.292061	0.652999	0.814177	0.916783	1.65648	2.59025	4.23059	3.8594	5.09057	7.17651	4.25715
IGDB00912	IGDB00912.2	1.93431	1.59608	0.302286	3.25919	3.90977	6.45766	9.32611	15.2365	14.3548	9.6481	4.73308
IGDB00914	IGDB00914.1	0	0	0.116336	0.0090975	0.323603	0.495011	0.653497	1.16346	0.728062	1.61668	0.390591
IGDB00914	IGDB00914.2	0	0.0173635	1.29016	0.091737	0.144656	2.56769	8.52735	20.585	28.2266	12.841	3.41306
IGDB00914	IGDB00914.3	0.039586	0.113317	0.706574	0.787219	1.18157	0.969598	2.80641	3.00298	8.97463	9.74412	2.33079
IGDB00930	IGDB00930.1	0.520414	0.248565	0.25657	0.69787	1.25242	1.13412	1.22414	1.49283	3.02906	2.85289	2.35166
IGDB00930	IGDB00930.2	1.92301	0.85061	0.164214	21.8101	45.3366	32.0329	20.8648	15.8415	8.34571	5.9121	5.8568
IGDB00941	IGDB00941.1	0	0	63.2633	0	0.755521	0.0413095	0	0.0044535	0	0	0
IGDB00941	IGDB00941.2	0.032815	7.42907	0	11.5533	0.580979	0.221873	0.115344	0.283326	0.305497	1.08215	0.355914
IGDB00941	IGDB00941.3	0	12.3031	13.5813	0.398942	1.48179	0.001896	0	0	0.014237	0.061867	0.007523
IGDB00941	IGDB00941.4	0	0	0	0	0	0	0	0	0	0	0
IGDB00941	IGDB00941.5	0	0	0	0	0	0	0	0	0	0	0
IGDB00941	IGDB00941.6	0	0	0	0	0	0	0	0	0	0	0
IGDB00941	IGDB00941.7	0	0.0074465	0	0	0	0.011521	0.0246955	0	0.010525	0	0
IGDB00943	IGDB00943.1	9.48607	8.4867	0.502981	0.443552	0	0	0.035175	0	0	0	0
IGDB00943	IGDB00943.2	0.587773	0.220194	0.006136	0.037622	0.061414	0.122721	1.17672	1.06937	2.15342	2.77969	0.435244
IGDB00943	IGDB00943.3	3.22521	2.73148	0	0.153304	0.540597	3.12457	4.5604	8.75398	7.03139	4.73829	3.11952
IGDB00947	IGDB00947.1	0.393791	0.153613	0.183692	0.062101	0.553424	4.87872	3.36035	4.24183	0.855302	1.75622	1.73757
IGDB00947	IGDB00947.2	0	0	0	0	0	0.0260135	0.772942	1.39862	0.758521	0.23144	0.105352
IGDB00947	IGDB00947.3	0	0	0	0	0	0	0	5.56166	11.9796	5.3574	1.30533
IGDB00947	IGDB00947.4	2.06984	0.857741	0	0	0	0	4.77678	9.27973	2.84901	3.43747	0.119993
IGDB00947	IGDB00947.5	0	0	0	0	0	0	0	0.022575	0	0	0
IGDB00947	IGDB00947.6	0.027872	0	0	0	0	0.0010455	3.1965	0.474413	0.69289	0.0692615	0.316389
IGDB00952	IGDB00952.1	0	0.0924725	0.0731705	0.09	0.389692	2.05762	5.88797	13.9517	12.7156	7.58678	2.07171
IGDB00952	IGDB00952.2	0	0	0	0	0.0129055	0	0	0	0	0	0
IGDB00952	IGDB00952.3	0.085394	0.039789	0.0627735	0.038802	0	1.00616	1.46688	2.47481	1.82957	1.33341	1.47514
IGDB00975	IGDB00975.1	0.366746	0.178064	0.0414555	0.185465	0.469039	0.0096345	1.96887	3.66711	1.10036	1.54076	0.032592
IGDB00975	IGDB00975.2	0	0	0	0	0.214312	1.67394	1.0786	1.07567	1.01496	1.66443	1.3621
IGDB00987	IGDB00987.1	0	0	0.035341	0	0	0	0	0	0.012554	0	0
IGDB00987	IGDB00987.2	0	0	0	0	0.495652	0.678705	1.2064	1.77146	1.36028	1.44018	0.896632
IGDB00987	IGDB00987.3	0.02849	0.041593	0.025013	0.170752	0.387833	0.700232	0.759511	1.29998	1.98428	1.39386	1.62867
IGDB00999	IGDB00999.1	7.60116	8.01891	1.2775	4.69991	8.30933	14.2856	14.0801	23.0666	5.75758	4.06269	4.2002
IGDB00999	IGDB00999.2	66.3218	65.213	4.68169	12.8553	10.6287	6.3958	13.5941	7.88384	12.8734	10.69	6.85267
IGDB01003	IGDB01003.1	0	0	0	0.7302	0	0	2.10171	0	2.36172	0	0
IGDB01003	IGDB01003.2	4.55223	4.11892	4.79995	1.47617	4.20979	4.53571	2.87298	7.12184	1.00994	6.922	4.42168
IGDB01043	IGDB01043.1	0.257304	0.609063	0.435663	0.336151	1.20471	1.20874	3.39117	2.78833	3.40565	5.13542	1.66042
IGDB01043	IGDB01043.2	0	0	2.04556	3.21642	3.41352	8.38033	10.7887	11.0651	11.4163	7.99696	4.3204
IGDB01043	IGDB01043.3	0	0	0.865012	0	0	1.70223	1.6779	2.64248	2.48363	0.93507	1.0293
IGDB01043	IGDB01043.4	0	0.132046	0	0.180206	0.105258	0.274014	0.201861	0.219394	0.371271	0.287152	0.0294345
IGDB01175	IGDB01175.1	0.035144	0.149549	0.34643	0.24845	2.65203	5.45203	3.17028	5.50952	2.16349	3.08136	1.74704
IGDB01175	IGDB01175.2	0	0	0	0.46106	13.3531	32.2733	37.4382	34.011	21.3728	18.0671	8.98383
IGDB01181	IGDB01181.1	0	0.041414	0.011772	0.135279	0	0	0	0	0.0170785	0.0541965	1.4587
IGDB01181	IGDB01181.2	0	0.0312955	0.15305	0	0	0	0	0	0.336861	1.06011	18.5182
IGDB01198	IGDB01198.1	0.024381	0	0	0.585679	2.02667	4.29752	10.4911	14.2232	10.0203	6.11863	5.90317
IGDB01198	IGDB01198.2	5.78399	7.53345	0.708858	0.234739	0.247124	0.22411	0.724812	4.69858	4.62499	4.83889	0.355239
IGDB01198	IGDB01198.3	0	0	0	0	0	0.133411	0.290766	0.580834	0.615865	0.210109	0.18342
IGDB01248	IGDB01248.1	0.246099	0.711766	2.35934	1.88931	0.987267	0.929758	1.2086	1.45588	1.25019	0.95619	0.675473
IGDB01248	IGDB01248.2	0.0854615	3.1235	17.528	18.9733	14.9181	9.6455	8.76198	7.48302	7.03297	8.08965	4.11227
IGDB01309	IGDB01309.1	4.98669	5.74216	0.0103435	0	0.0772055	0.162484	1.00283	4.0833	4.77524	3.29627	0.947307
IGDB01309	IGDB01309.2	0.069935	0.138524	0.1485	0.040489	0.0288395	0.497015	0.398884	1.29363	0.448355	0.415445	1.09885
IGDB01309	IGDB01309.3	0	0	0	0	0	0	0.174836	0	0.391483	0	0
IGDB01309	IGDB01309.4	0	0	0	0	0	0.033889	0.037606	0.176676	0.991734	0.27718	0.0449685
IGDB01309	IGDB01309.5	0.531453	0.038773	0	0	0.0072165	0.0163835	0.125464	1.52077	1.79842	0.934213	0.132317
IGDB01309	IGDB01309.6	0.0112205	0.449306	0	0	0	0	0.226921	0	0	0	0.120049
IGDB01309	IGDB01309.7	0	0	0	0	0	0	0	0.423963	0.054246	1.43502	0
IGDB01326	IGDB01326.1	0.0373575	0.199624	0.978078	0.263626	0.385014	0.0009245	0.015399	5.09564	5.6384	5.58301	1.36131
IGDB01326	IGDB01326.2	0	0	0	0	0	3.6819	8.58507	13.0467	10.6213	2.68937	1.36479
IGDB01366	IGDB01366.1	0.318373	0.097048	0.204494	0.419191	0.328012	0.1248	0.762251	1.22417	0.570886	0.591527	0.666941
IGDB01366	IGDB01366.2	1.52758	0.767464	0.0820885	0	1.30784	3.07453	2.49684	6.068	8.44851	5.01032	3.93357
IGDB01366	IGDB01366.3	1.0726	0.870652	0	0.615712	0.658278	1.30482	4.7881	1.60543	2.40673	4.06079	2.08982
IGDB01366	IGDB01366.4	0	0	0	0	0	0.000622	0.0006505	0.002768	0.001373	0.0006035	0.0020705
IGDB01371	IGDB01371.1	0.0851195	0.096266	0.453556	2.75504	8.36338	15.1392	16.4989	12.7271	1.79573	2.91334	0.66799
IGDB01371	IGDB01371.2	0	0	0.0374115	0.107314	0	5.68798	7.90154	7.96244	13.9454	5.40616	2.67395
IGDB01371	IGDB01371.3	0	0	0	0	0.525354	0	3.08517	7.569	0.958927	1.88184	0.529277
IGDB01371	IGDB01371.4	0	0	0	0	0.001022	9.65e-05	0	0.001469	0	0	0
IGDB01371	IGDB01371.5	0	0	0.116571	0.552324	0.290884	0.376848	0.115016	0.344518	0.021516	0.0947615	0.00024
IGDB01415	IGDB01415.1	0	0.0980575	0.0978255	0.084328	0.059472	0.244186	0.717351	2.25782	1.74168	1.56239	0.521563
IGDB01415	IGDB01415.2	0.101784	0.0507655	0.249589	0.22317	0.068863	0.486596	1.00141	0.820142	2.13481	1.77769	0.531733
IGDB01422	IGDB01422.1	0.274226	0.0655235	0	0	0	0	0	0	0	0.562253	0.311422
IGDB01422	IGDB01422.2	0.025059	0.468521	0.0110455	0.056159	0.257698	1.05831	0.269314	0.007506	0.0302535	0.85148	0.788798
IGDB01422	IGDB01422.3	0.436921	0.0262105	0	0	0.368062	0	0.894036	3.44581	3.34506	1.47126	0.715987
IGDB01422	IGDB01422.4	0.0808465	0	0	0	0	0.131923	0.607888	0.127301	0.218798	0.0450255	0.143989
IGDB01454	IGDB01454.1	0	0	6.3234	5.37721	5.80772	7.19266	7.40191	5.47539	4.0398	4.88645	3.40384
IGDB01454	IGDB01454.2	39.1305	21.072	12.1421	3.89322	5.3762	4.48132	5.00273	4.99093	4.14106	6.85104	6.2989
IGDB01454	IGDB01454.3	0	0	0	0.690113	0	0.0768155	0.664623	1.11936	0	0.504859	0.357268
IGDB01467	IGDB01467.1	0	0.0729815	0	0	0.056338	0.0026475	0	0	0.525801	0	0
IGDB01467	IGDB01467.2	0	0	0	0	0	0.509799	0	0	0.551055	0.941804	0
IGDB01467	IGDB01467.3	0.0094295	0.0473425	0.017423	0.024516	0.627944	1.31899	0.753783	0.984783	0.733702	1.06534	0.720004
IGDB01467	IGDB01467.4	0	0	0	0	0.0118045	0.052045	0.305507	0.337367	1.56446	1.5237	0.370746
IGDB01467	IGDB01467.5	0.0347715	0	0	0.216807	0.365299	0.0893665	0.237717	0.0513585	0	0.365055	0
IGDB01467	IGDB01467.6	0.167344	0.001728	0	0.798829	2.44929	2.83496	3.76454	4.60722	2.89033	2.01353	3.67746
IGDB01516	IGDB01516.1	0.876103	0.321406	0	0	0.61693	0.553489	1.19304	1.32312	0.251626	0.323228	0
IGDB01516	IGDB01516.2	0.413771	0.233692	0.0186705	0	0.252766	1.15298	1.85116	5.10907	9.08141	10.3244	4.19688
IGDB01521	IGDB01521.1	0	0	0.0093225	0.262871	0.181051	0.465008	0.928524	7.07424	6.87079	9.86115	1.67959
IGDB01521	IGDB01521.2	0	0	0.225734	0.469824	1.60801	3.03187	5.01219	13.7839	14.774	27.9039	6.89503
IGDB01521	IGDB01521.3	0.0727085	0.284481	0.239446	0.488918	0.147491	0.236715	0.729293	0.904594	0.386244	0.29996	1.49732
IGDB01522	IGDB01522.1	0.381661	0.593	0.312053	1.30367	1.87662	2.5263	3.43452	2.55554	1.22304	1.75784	2.59338
IGDB01522	IGDB01522.2	0.0630665	0.021791	0.0183405	0.593136	0.57253	1.8289	1.80875	4.37688	4.67351	3.61058	2.51251
IGDB01537	IGDB01537.1	0	0	0.0210135	0	0.0151425	0.14279	0.406162	1.73188	4.72553	2.61557	0.586562
IGDB01537	IGDB01537.2	0	0	0	0	0.0776755	0.237557	0.483895	2.72893	5.45329	2.8032	0.41222
IGDB01558	IGDB01558.1	0.259474	0.168314	0.220522	0.516579	0.685682	0.622372	1.09589	0.874173	0.58255	0.709443	0.279585
IGDB01558	IGDB01558.2	0.0424335	0.0136095	0.022591	0.292695	0.142537	0.384381	0.700743	0.577567	1.3012	0.69538	0.939798
IGDB01558	IGDB01558.3	0.167392	0.149054	0.138684	0.287477	0.348683	0.255239	0.403196	0.57955	0.081811	0.576635	0.345189
IGDB01569	IGDB01569.1	2.1527	1.54799	0.513966	1.03118	0.911729	1.03305	0.173428	0.992888	1.45885	1.49347	1.32696
IGDB01569	IGDB01569.2	2.83099	1.74433	0	0.550628	0.964925	1.17844	1.61923	0.901642	0	0	0
IGDB01569	IGDB01569.3	0	0	0	0	0	0	0.0530595	0	0	0.028143	0
IGDB01569	IGDB01569.4	0.215607	0.040498	0	0	0.0096905	0	0	0	0	0	0
IGDB01570	IGDB01570.1	2.44573	1.09273	0.704112	0.2997	0.696013	0.782559	1.7954	4.25813	2.0786	2.37322	0.756713
IGDB01570	IGDB01570.2	0	0	0	0	0.014618	0.773406	1.86139	3.98407	2.23322	1.64111	1.17771
IGDB01570	IGDB01570.3	0	0	0	0.0050045	0.50375	1.11931	2.53954	6.50139	3.89067	5.45443	8.23439
IGDB01570	IGDB01570.4	0	0.0278355	0	0	0	0	0	0	0	0	0
IGDB01570	IGDB01570.5	0	0	0	0	0	0.582902	1.42583	1.73849	2.32594	1.76199	2.00314
IGDB01570	IGDB01570.6	0.0997315	0.125151	0.0998885	0.0150765	0	0	0	0	0	0	0
IGDB01570	IGDB01570.7	8.79323	3.67735	0	0.727458	0.023231	3.23274	8.44004	15.1564	10.4605	6.56034	9.20127
IGDB01570	IGDB01570.8	4.89135	5.97763	0.16211	0.017842	0.0568735	0.0897905	0.386112	1.07374	0.573124	4.47043	6.40697
IGDB01573	IGDB01573.1	39.518	46.2406	5.25542	0.0857125	0.079346	0.452637	3.20656	3.47765	3.20237	4.88123	5.48187
IGDB01573	IGDB01573.2	6.79159	6.54749	9.27697	3.02968	8.89392	8.4299	6.63335	8.34215	6.86802	6.73333	5.61095
IGDB01573	IGDB01573.3	4.54001	4.5302	6.26732	3.21729	0.844077	2.7176	2.37457	3.77488	0	0	1.15567
IGDB01573	IGDB01573.4	0.142732	0.118887	0.194457	0.020882	0.0642955	0.06952	0.065408	0	0.0175885	0.0094775	0.016019
IGDB01582	IGDB01582.1	45.5265	37.9395	24.6555	6.43799	10.3391	19.8487	11.2638	8.95988	0.927013	3.92448	14.308
IGDB01582	IGDB01582.2	0.035453	0.194321	0.0102575	0.016978	0.0582525	0.0525935	0.031499	0.0280275	0	0.0137545	0.046654
IGDB01582	IGDB01582.3	0	0	0.018605	0.0185685	0.0077795	0.0134895	0.011294	0.011182	0.0369365	0.048879	0.034028
IGDB01582	IGDB01582.4	0	0.141077	0.0341855	0.0542445	0.084074	0.070671	0	0.0696875	0.0288215	0.039677	0.0944805
IGDB01582	IGDB01582.5	2.66292	6.58485	2.31869	6.42788	10.548	2.63236	8.78623	3.72917	2.70901	3.03334	1.64054
IGDB01591	IGDB01591.1	0.617313	0.396655	0.0443625	0.0553725	0.126852	0.896641	0.396437	1.42359	2.35552	2.33198	1.37257
IGDB01591	IGDB01591.2	0	0	0	0	0	0.670357	0.491392	1.76417	2.37405	2.21905	1.5187
IGDB01591	IGDB01591.3	0	0	0	0	0.072361	0.210817	1.55664	1.70983	0.860659	1.07497	0.729498
IGDB01591	IGDB01591.4	0.977481	0.001976	0	0	0.041587	0.0173665	0.169292	0.420158	0.685372	0.515559	0.355204
IGDB01597	IGDB01597.1	0	0	0	0.022695	0	0	0.0069075	0.125787	0.0039025	0	0
IGDB01597	IGDB01597.2	0	0	0.225801	0.271033	1.3961	2.46827	3.62601	9.54133	12.5282	7.90522	3.4366
IGDB01597	IGDB01597.3	0.0130075	0.0575715	0	0.167241	0.499088	0.566204	0.457321	1.32452	2.02565	2.26785	0.496287
IGDB01625	IGDB01625.1	7.88387	8.159	5.97485	1.47777	1.32894	0.791428	0.932381	0.949062	2.21616	1.73306	2.06122
IGDB01625	IGDB01625.2	0	0	0	0	0	0.063085	0	0	0.0617515	0.0357975	0
IGDB01625	IGDB01625.3	0	0	4.09787	5.2101	8.08941	9.43206	13.0994	9.62506	8.8536	7.97087	5.25786
IGDB01625	IGDB01625.4	0.591577	0.234478	0.0456435	0.245006	0.517259	3.92322	4.63201	4.43351	3.83333	2.30374	1.06805
IGDB01625	IGDB01625.5	0	0.115675	0.613036	0.0162695	0	0.104478	0.0243145	0.765691	1.22363	0.853154	0.141529
IGDB01625	IGDB01625.6	0.082057	0.262488	0.372459	1.04197	1.83846	3.05609	2.16482	0.514621	2.56743	0.54976	0.0776155
IGDB01625	IGDB01625.7	0	0	0.189519	0.087482	0.880332	0.551199	3.33972	1.62116	0	0	0.731222
IGDB01625	IGDB01625.8	0	0	0	0	0.704951	2.01118	0.40431	5.92844	2.25867	5.21001	3.41417
IGDB01648	IGDB01648.1	0	0	0	1.57109	4.10858	3.58195	6.18944	6.94923	4.97227	1.7114	3.49059
IGDB01648	IGDB01648.2	3.70106	7.759	7.5829	0.999861	1.75813	3.51292	1.87932	2.38561	1.09953	3.9732	2.1078
IGDB01648	IGDB01648.3	5.96635	0	0	0	0.260369	0.060585	0.163256	0.815574	4.72277	1.8473	3.78802
IGDB01662	IGDB01662.1	1.85093	3.34218	0.413411	1.06413	1.75876	5.39992	12.854	19.4095	15.9926	17.2873	4.13619
IGDB01662	IGDB01662.2	20.8447	15.1556	1.3828	0.55017	2.99018	4.07185	3.01702	3.92698	5.32247	6.2205	3.94939
IGDB01683	IGDB01683.1	4.2578	1.70296	2.46413	3.07806	2.66672	2.71426	2.71785	2.06775	1.40238	1.08779	1.35749
IGDB01683	IGDB01683.2	0	0	0	0	0.818704	5.64806	8.21269	9.23373	7.56344	5.06308	1.98284
IGDB01726	IGDB01726.1	49.8567	19.7325	0.990101	0.92709	0.727855	0.586849	0.788138	1.14553	2.35441	2.292	2.77264
IGDB01726	IGDB01726.2	15.198	10.5622	3.30892	2.77662	2.64089	2.45856	2.24279	3.72546	3.11653	2.95917	3.96394
IGDB01767	IGDB01767.1	7.84861	7.59647	3.95632	1.78966	2.5556	2.7972	3.57847	2.00588	2.44885	1.69485	1.20651
IGDB01767	IGDB01767.2	0.0492275	0.0587775	0.26109	0.348976	0.475834	0.349444	0.637098	0.339427	0.386402	0.243255	0.895788
IGDB01767	IGDB01767.3	4.87094	6.31023	10.6735	17.3944	18.4199	11.1648	9.25566	13.7913	11.5858	13.2364	17.647
IGDB01773	IGDB01773.1	0	4.78982	1.1284	0.550106	1.28998	0.875333	0.559852	1.46626	1.48148	1.24187	1.02509
IGDB01773	IGDB01773.2	0	3.25129	1.00262	1.91648	0.845911	1.35101	1.5327	4.70784	6.18511	4.05381	3.30501
IGDB01774	IGDB01774.1	0.0414365	0	0.0564965	0.164527	0.409046	0.504204	1.66829	1.68597	0.991718	2.00843	1.55663
IGDB01774	IGDB01774.2	0	0	0.023849	0.102326	0.036557	0.001569	0	0	0.155828	0.000493	0
IGDB01774	IGDB01774.3	0.0566695	0	0	0	0.0443035	0.148282	1.40057	0.688098	0.60445	0.338803	0.334624
IGDB01774	IGDB01774.4	0	0	0.0905475	0	0.161806	0.503367	0.534458	0.698871	0.617148	2.95458	1.47024
IGDB01774	IGDB01774.5	0.0267175	0.071771	0	0.0709215	0.712549	1.92321	0	0.440119	0.842078	0	0
IGDB01831	IGDB01831.1	0	0.169976	13.3502	19.6001	13.5941	5.72198	1.76199	1.33074	0	0	7.99986
IGDB01831	IGDB01831.2	0.0563105	0.618901	1.34091	7.21845	3.38761	1.28865	0.398811	0.357097	0.887459	0.092937	0.421681
IGDB01834	IGDB01834.1	0.08103	0.696789	5.00168	6.25006	4.00691	2.33832	1.86195	3.26256	1.65156	1.52455	1.67972
IGDB01834	IGDB01834.2	0.556844	0.463383	5.2983	2.2787	2.16455	1.70085	2.23361	0.554728	2.54602	0.607333	0.028066
IGDB01843	IGDB01843.1	0	0.141806	0.278362	0.301828	2.51701	8.68373	20.3475	23.8513	18.057	13.9747	13.5063
IGDB01843	IGDB01843.2	0	0	0.158565	0.736513	2.63838	11.2068	24.8275	25.0943	21.6499	20.0666	18.3927
IGDB01847	IGDB01847.1	0.0281295	0.134409	1.12094	1.6708	1.7794	4.37257	6.86313	7.14163	3.18834	4.64743	1.38613
IGDB01847	IGDB01847.2	0	0.261153	0.614517	1.07178	1.8804	4.98272	6.65559	4.1017	4.27561	5.68034	0.367314
IGDB01847	IGDB01847.3	0	0	0	0	0	0	0	0	0	0	0
IGDB01916	IGDB01916.1	0	0	0	0	0.021898	0	0	0	0	0.302416	0
IGDB01916	IGDB01916.2	0	0.0074185	0.603433	4.61176	4.5789	6.25062	3.4958	3.17638	2.05996	2.4436	1.76442
IGDB01916	IGDB01916.3	0.170567	0.168298	0.566759	0.0457305	0.032822	0.113375	1.85467	0.0246655	1.14964	0.059354	1.08966
IGDB01916	IGDB01916.4	0	0	0	0	0	0	0	0	0	0	0
IGDB01916	IGDB01916.5	0	0	0	0	0	0	0	0	0	0	0
IGDB01935	IGDB01935.1	0	1.23152	0.242911	0.61314	1.01753	0.957784	1.66942	0.647782	1.09437	0.79206	0.29871
IGDB01935	IGDB01935.2	0	0	0	0.483797	2.29117	2.88817	1.94383	1.49236	0	0.446887	0.118249
IGDB01935	IGDB01935.3	0	0	0	0	0	0	0	0	0	0	0
IGDB02060	IGDB02060.1	0.132274	0.167177	0.013591	0.09596	0.491895	0.231778	0.237969	0	0	0.0849245	0.203038
IGDB02060	IGDB02060.2	0	0	0	0	0	1.0229	5.75283	6.57752	8.52209	4.13373	0.792993
IGDB02060	IGDB02060.3	0	0	0	0.0024635	0	1.54858	1.91856	5.90416	2.88045	2.53572	1.202
IGDB02060	IGDB02060.4	0	0	0	0	0	0.494132	1.13405	2.0005	1.20201	1.10613	0.116266
IGDB02063	IGDB02063.1	13.8163	3.66621	0	0.0104755	0.026261	0.0116485	0	0.030573	0.185474	0.967904	0.910604
IGDB02063	IGDB02063.2	0.445091	3.01714	0.594306	0.1863	0.359579	1.18926	1.32498	0.664304	0.850988	0	0.451267
IGDB02063	IGDB02063.3	0	0	0	0	0.277734	0	0.181253	1.43878	0.732795	0.68037	0.514731
IGDB02063	IGDB02063.4	0	0.0094115	0	0	0	0	0.0506455	0.016556	0.018037	0	0
IGDB02066	IGDB02066.1	0.421708	0.513933	3.10566	17.5241	13.9155	19.7356	16.6556	6.3172	4.72231	3.53567	2.48664
IGDB02066	IGDB02066.2	0	0.0394725	0	0.210621	0.131233	0	0	0.528185	0	0	0.082367
IGDB02066	IGDB02066.3	0	0	0.0577555	0.418604	0.026649	0.404449	0	0	0.223408	0.0506795	0
IGDB02066	IGDB02066.4	0	0.0623795	0.127289	1.25749	2.58514	2.95203	2.31053	0	0.273946	0.432193	0
IGDB02066	IGDB02066.5	0	0.0691945	0	0.93877	0.417266	1.03807	3.68295	6.74515	9.13223	6.49517	1.28674
IGDB02110	IGDB02110.1	0.383101	0.485712	0.429319	0.0322215	0.478108	3.04683	6.94372	17.687	21.245	15.5338	10.1472
IGDB02110	IGDB02110.2	0.596796	0	0	0	0	0.0739375	0.192542	1.03177	0.95814	0.169009	0.0872905
IGDB02122	IGDB02122.1	0.204224	0.775702	0.459579	0.470034	0.262665	0.573825	0.193937	0.17209	0.886207	1.04228	3.03374
IGDB02122	IGDB02122.2	0.289989	1.37363	0.228595	0.188848	0.130393	0.0578135	0	0.030314	0.0537645	0.501011	3.07233
IGDB02231	IGDB02231.1	2.5919	1.26546	0.081535	0.413044	0.17822	0.331524	0.165289	0.221834	0.23352	0.137015	0.213873
IGDB02231	IGDB02231.2	1.22458	0.323452	0.328861	0.501501	1.09826	0.566087	0.729804	0.906347	0.599935	0.485337	0.387394
IGDB02231	IGDB02231.3	0.528706	0.848897	0.018766	0.0996455	0.378603	0.0478045	0.172121	0.104055	0.098121	0.112987	0.0535125
IGDB02231	IGDB02231.4	0	0.0271455	0	0	0.0080455	0	0	0	0	0.0081975	0
IGDB02231	IGDB02231.5	0	0	0	0.0456965	0.0422535	0.039833	0.037133	0.169503	0	0.0289095	0.159615
IGDB02253	IGDB02253.1	0.0539635	0.033487	0.120162	0.487231	0.501669	0.0740185	1.5997	1.51794	1.49095	1.19015	1.52492
IGDB02253	IGDB02253.2	0.021506	0.0571105	0.268887	0.359777	0.886444	0.814575	0.475112	1.07608	0.258655	1.82834	0.369756
IGDB02253	IGDB02253.3	0	0.0069025	0.034969	0.038074	0.239695	0.668667	0	0	0	0.000393	0
IGDB02256	IGDB02256.1	0	0	4.314	0.861415	2.77117	3.98302	3.43029	5.61586	8.10722	4.31071	3.55517
IGDB02256	IGDB02256.2	0.0180205	0	0.842433	1.23	0	0.819554	0.118472	0.0012165	0.855715	1.53652	0.035239
IGDB02256	IGDB02256.3	0	0	0	0.460335	0	0	1.29863	5.39203	6.76802	4.70145	0.746367
IGDB02256	IGDB02256.4	0.229807	0.159971	4.01886	1.41321	0	0.174914	0.001896	0.023692	0.0668245	0.039615	0
IGDB02256	IGDB02256.5	0	0	0	0	0.882529	0	2.23746	1.13796	1.17087	2.78279	1.50963
IGDB02256	IGDB02256.6	0	0	1.71664	0	1.28983	0	0	1.80174	2.35614	0.24194	1.26889
IGDB02278	IGDB02278.1	0.005635	1.70644	0.301491	0.178819	0.0606615	0.075194	0.052443	0.052762	0.022121	0.092066	0.0370705
IGDB02278	IGDB02278.2	0	20.4499	0.395441	1.44543	0.665813	0.715565	0.644221	0.690589	0.745645	1.14702	1.25543
IGDB02298	IGDB02298.1	0	0	0	0	0	0	0	0.124848	1.69172	1.76386	1.44929
IGDB02298	IGDB02298.2	0.113033	1.66844	0.202854	0.0419955	0.0547755	0.026481	0.0363125	0.563222	1.09928	1.0706	1.90446
IGDB02347	IGDB02347.1	26.7949	12.5691	1.46262	5.82404	0.298077	1.70148	7.22611	3.92736	4.90596	3.66519	7.09161
IGDB02347	IGDB02347.2	0	0	0	0	0	0	0	0	0	0	0
IGDB02347	IGDB02347.3	0.190941	1.05638	0	0	0.424644	0.397996	0.156496	0.667216	0	0.173776	0.282577
IGDB02347	IGDB02347.4	3.37777	1.28715	0	0.258775	0.535106	3.10175	4.36292	2.10325	2.39795	0.90974	0
IGDB02347	IGDB02347.5	0	0	0	0	0	0	0	0	0	0	0
IGDB02347	IGDB02347.6	0	0	0	0	0	0	0	0	0	0	0
IGDB02347	IGDB02347.7	4.57293	10.0269	2.8325	2.37266	8.17231	9.7661	5.16584	6.24045	0	1.68423	0
IGDB02351	IGDB02351.1	0.165197	0.118599	0.441623	0.314462	0.822064	3.18322	5.67187	13.4437	13.6214	6.88445	2.67802
IGDB02351	IGDB02351.2	0	0.106969	0.230398	0	0.527632	0.509351	0	1.64366	0	0.704388	0.151002
IGDB02351	IGDB02351.3	0.0449575	0	0.320866	0.910189	1.50029	2.82796	3.67272	6.35295	6.11412	4.54818	1.80565
IGDB02352	IGDB02352.1	0.0357025	0.359215	0.0276525	0.74993	0.007511	0.044342	0	0	0.300204	0.149003	0.111101
IGDB02352	IGDB02352.2	0	0.344064	0	0	1.28513	1.25219	0.67833	0.1775	0.186228	0.374594	0.577612
IGDB02352	IGDB02352.3	0	0.0654625	0	0	3.71906	0.99193	0.789104	0.65142	0.238082	0.256734	0
IGDB02352	IGDB02352.4	0	0	0	1.14395	0.555975	0.637451	0.250067	0.295142	0.23248	0.505493	0.690325
IGDB02380	IGDB02380.1	0.173417	0.504388	0.835587	1.13003	0.957864	1.37813	1.68182	0.951321	0.935622	0.758348	0.912021
IGDB02380	IGDB02380.2	0.03084	0	0.376444	0.044513	0	1.34435	1.2758	0.593399	0.230621	0.379273	0
IGDB02380	IGDB02380.3	0	0.0730775	0.8952	0.0516385	0.11482	0.0813865	0.162073	0.905275	0.342465	0.506228	1.46191
IGDB02380	IGDB02380.4	0	0	0	0.317682	1.67575	1.78622	0.576403	4.01687	2.93263	2.46774	3.86266
IGDB02380	IGDB02380.5	0.0061925	0.108751	2.82959	5.54668	5.57889	4.38848	6.15364	5.2168	3.06596	3.0465	8.4557
IGDB02380	IGDB02380.6	0	0.0368255	0.034889	0.112127	0.205721	0.179831	0.168395	1.17233	0.263356	0.340446	0.934959
IGDB02383	IGDB02383.1	20.2554	16.5267	2.18011	0.477714	0.550873	0.518388	0.734854	1.113	1.26889	2.4175	3.82288
IGDB02383	IGDB02383.2	8.26826	6.44021	5.2479	0.919257	0.132807	0.140148	0.672297	1.57922	1.93131	5.41193	9.98402
IGDB02392	IGDB02392.1	0.082827	0.068153	0.12547	0.325643	0.486521	0.236873	0.320586	0.662357	0.259541	0.323211	0.286348
IGDB02392	IGDB02392.2	10.6529	3.0177	7.86001	13.513	16.6655	15.6056	21.5058	19.7336	14.4059	10.706	14.8177
IGDB02392	IGDB02392.3	20.0242	10.4002	1.76836	5.66978	5.46857	9.49016	7.09819	5.8391	5.11228	8.52882	5.52845
IGDB02408	IGDB02408.1	0	0	0.200085	0.083357	0.069847	0.732617	0	0	3.86123	1.42304	0
IGDB02408	IGDB02408.2	0	0	0	0	0.153194	1.38517	3.25862	5.10962	0	1.87534	1.82652
IGDB02409	IGDB02409.1	0.019186	0.569177	23.8701	2.83142	0.515265	1.31178	1.001	8.39003	8.33982	9.13378	3.13303
IGDB02409	IGDB02409.2	0	0	0	1.23173	0	13.7502	37.0131	41.5216	32.3254	24.9401	4.21653
IGDB02415	IGDB02415.1	0.049343	0	1.7133	1.46019	1.78747	5.66676	8.93312	11.4831	5.99547	4.78366	0.878995
IGDB02415	IGDB02415.2	0	0	0	0	1.63403	1.91356	2.70123	4.61686	4.21371	2.46055	1.14892
IGDB02415	IGDB02415.3	0	0.42811	0.093577	1.60949	0.053695	0.457425	2.15869	2.24953	6.53215	4.41828	1.68847
IGDB02422	IGDB02422.1	0.778549	0.35332	0.148131	0.608405	0.741802	0.458797	0.530064	0.182084	1.80891	2.41946	1.41999
IGDB02422	IGDB02422.2	0.0827095	0.023238	0.013273	0.204205	1.54448	0.846426	0.722727	2.30223	2.65811	3.44501	1.44556
IGDB02432	IGDB02432.1	0.434851	3.07483	2.07451	1.72059	1.01435	0.178884	0.327251	0.065647	0.160253	0.074542	0
IGDB02432	IGDB02432.2	0.83828	1.59141	17.9118	7.4738	5.37211	4.3656	4.02671	2.25875	5.33602	7.44943	7.24431
IGDB02432	IGDB02432.3	1.01215	0	0	0	0	0	0	1.33027	0	0	0
IGDB02458	IGDB02458.1	0	0	0.0462485	0	0	0.007565	0.01785	0.054384	0.047427	0.135353	0.567711
IGDB02458	IGDB02458.2	0	0.021304	0.052924	0	0.826597	4.31739	4.70005	5.63715	6.30015	4.5335	2.14392
IGDB02458	IGDB02458.3	0.0128145	0.0188775	0.148634	0.314914	0.990963	1.42844	2.93666	5.18255	3.20276	2.89233	2.98417
IGDB02463	IGDB02463.1	0	0	0	0.0056245	0	0.005675	0.0268295	0.0411605	0.182817	0.542413	1.64464
IGDB02463	IGDB02463.2	0	0	0	0	0	0	0	0	0	0.263676	0
IGDB02463	IGDB02463.3	0	0	0	0	0	0	0	0.210605	2.04526	5.94033	6.74506
IGDB02467	IGDB02467.1	0.307539	0.213408	0.337892	0.581801	0.362214	0.342801	4.11047	2.77274	1.69299	3.65466	0.814769
IGDB02467	IGDB02467.2	0.033593	0.0936085	0.618406	0.821083	2.34155	4.62206	8.46837	10.3866	7.17191	5.37607	0.68646
IGDB02468	IGDB02468.1	0.129869	0.524544	0.478695	0.479496	0.814437	1.29328	0.850566	0.662435	1.20924	0.248831	0.641697
IGDB02468	IGDB02468.2	0.0383885	0.057069	3.55118	1.4992	1.79378	3.68585	2.50494	3.22039	2.62308	2.50277	3.22608
IGDB02469	IGDB02469.1	0	0	0	0	0	0	0.0052915	0	0.056572	0	0
IGDB02469	IGDB02469.2	0.130022	0.29287	0	0.0369385	0.107957	3.95766	6.86145	7.1228	5.48809	4.22879	1.61088
IGDB02469	IGDB02469.3	0.0277005	0.033813	0.010383	0	0.009151	1.31343	2.53045	1.15806	2.38313	2.16006	0.777883
IGDB02478	IGDB02478.1	0.078264	0	0.0635	0.0486785	0.062836	0.475102	0.786995	0.634467	1.00568	0.269006	0.339558
IGDB02478	IGDB02478.2	0.0231205	0.0380295	0.057707	0.086734	0.512991	5.94896	14.0559	12.7812	6.80937	5.09715	1.45358
IGDB02499	IGDB02499.1	0	0	0	0.0969035	0.257865	0.135521	0.299646	0.391791	0.419349	1.46652	11.4968
IGDB02499	IGDB02499.2	0.0127885	0	0	0	0	0	0	0	0	0.15045	6.22467
IGDB02503	IGDB02503.1	0.805582	0.594718	0.175856	1.74657	2.6905	1.34041	4.87491	7.50467	3.82117	3.63244	2.35449
IGDB02503	IGDB02503.2	0.743427	0.781443	0.237856	1.11906	1.61925	1.84161	2.94733	5.94194	5.77226	3.39577	1.44962
IGDB02503	IGDB02503.3	0	0	0	5e-07	0	5e-07	0	0	0	0	2e-06
IGDB02503	IGDB02503.4	0.053093	0.017288	0.0024995	0.0154355	0	0.126405	0.0674245	0.0210585	0.105347	0.067412	0.0818935
IGDB02508	IGDB02508.1	0	0.0130915	0.0064225	0.0103265	0.138153	0.516096	1.63293	1.54483	1.04803	4.35857	1.9185
IGDB02508	IGDB02508.2	0	0.133366	0	0	0.0259145	0.405068	1.26828	1.30851	1.55076	4.12087	2.51521
IGDB02518	IGDB02518.1	0	0	0	0	0	0.24822	0	0.957412	0.95626	1.81731	0
IGDB02518	IGDB02518.2	0	0	0	0	0.350282	0	0	0	0	0	0.025234
IGDB02518	IGDB02518.3	0	0.026369	0.0209125	0.0410965	0.15009	0.237183	0.396882	0	0.612954	0	1.135
IGDB02530	IGDB02530.1	92.8284	38.6796	6.7268	5.04844	5.2602	5.56241	3.50272	3.84997	3.54717	3.34093	4.71318
IGDB02530	IGDB02530.2	40.5928	18.488	2.20641	1.12767	0.783078	0.152084	1.0359	0.0744015	0.220846	0.812481	0.068955
IGDB02530	IGDB02530.3	8.07547	0.0177915	1.6102	1.29982	1.88925	5.9793	7.52665	6.91576	4.15631	4.42653	2.86026
IGDB02536	IGDB02536.1	0	0	0	1.68377	0.649391	1.13098	2.48016	4.59051	2.38277	2.40633	5.90075
IGDB02536	IGDB02536.2	0.0702625	0.025051	0.0799285	0.539708	2.6175	1.1322	0.243067	0.717296	3.73822	4.11172	1.02681
IGDB02536	IGDB02536.3	0	0	0	0	0	0	0	0	0	0	0
IGDB02536	IGDB02536.4	0	0	0	0	0.649012	0.046589	0	0.10989	1.21521	1.46531	3.69023
IGDB02536	IGDB02536.5	0	0	0	0	0	0	0	0	0	0	0
IGDB02536	IGDB02536.6	0	0	0	0	0.005875	0.183726	0.493768	0	0.321911	1.475	0.657493
IGDB02570	IGDB02570.1	0.476755	0.349578	0.842592	0.529034	0.905621	2.23451	4.12563	10.2537	9.51585	9.36275	3.21834
IGDB02570	IGDB02570.2	0	0	0	0	0.050025	0	0	0	0	0.260128	0.238285
IGDB02570	IGDB02570.3	0	0	0	0	0	0	0.008794	0.001846	0	0.143251	0
IGDB02570	IGDB02570.4	0	0.0124705	0	0.192464	0.0238425	0.115209	0.16498	0.580175	0.844182	0.364956	0.151602
IGDB02570	IGDB02570.5	0.807022	0.199066	0.0866805	0	0	0	0.364509	1.5718	1.35977	0.702588	0.868852
IGDB02589	IGDB02589.1	0	0	0	0	0.124958	1.15452	0.436341	0.741251	1.06444	0.827349	1.89883
IGDB02589	IGDB02589.2	1.50631	1.90976	0.206907	0.156695	0.309454	0.513167	1.24128	2.26999	1.48509	1.301	5.70717
IGDB02592	IGDB02592.1	0.276848	0.593784	0	0.007185	0.0574225	0.423526	0.867973	2.92426	3.87847	3.92454	1.22444
IGDB02592	IGDB02592.2	0.591164	0.234292	0	0	0	0	0.148949	1.28757	1.456	1.57959	0.241106
IGDB02601	IGDB02601.1	0.0176605	0.0243335	0.120255	0.0050815	0.204579	1.68945	1.69279	0	4.86353	1.91506	0
IGDB02601	IGDB02601.2	1.85324	0.871511	0.013275	0	0.0315405	0.012808	2.53554	1.94848	1.24402	2.32364	0.942378
IGDB02601	IGDB02601.3	2.45741	0	0	0	0.022267	2.45038	2.15099	0.552527	0.687844	1.39334	0.904104
IGDB02601	IGDB02601.4	0	0.66294	0.728914	0.010751	0.424932	0	0	3.55124	0	0	0.371503
IGDB02601	IGDB02601.5	0.583171	0.022852	0	1.4269	1.17068	0.016491	0.317778	0.074043	0.0913695	0.085174	0.508282
IGDB02601	IGDB02601.6	0.42908	0	0	0.299348	2.75718	5.38628	8.56162	10.5385	2.54261	2.24689	1.94578
IGDB02603	IGDB02603.1	0.420038	0.11652	0.022866	0.529127	0	0.196324	0	0	0.243716	0.018668	0
IGDB02603	IGDB02603.2	0	0	0	0.260611	1.81996	1.73043	2.20888	4.32034	2.21156	4.71526	1.79682
IGDB02603	IGDB02603.3	0	0.196045	0	0.401798	0.93333	1.04538	1.46932	2.29728	3.29884	0.671776	1.1705
IGDB02628	IGDB02628.1	0.221117	0.303148	0.290187	0.604456	0.578358	0.768105	0.784203	1.33579	3.34553	3.19248	0.564968
IGDB02628	IGDB02628.2	0	0	0.0210155	3.04542	6.54653	8.55498	8.94461	9.14268	6.85263	3.92041	8.22813
IGDB02631	IGDB02631.1	5.8537	6.24254	6.04368	2.04357	2.96221	8.56715	5.93608	4.77932	5.17668	5.04429	2.34044
IGDB02631	IGDB02631.2	0.200994	0.644344	4.93855	4.12246	4.92808	1.06816	4.76692	3.63851	0.565669	0.253283	0.178492
IGDB02660	IGDB02660.1	5.91566	6.13347	5.45027	12.0762	14.2807	13.7764	9.39926	15.6385	8.69144	14.2232	1.94005
IGDB02660	IGDB02660.2	13.0893	11.1718	6.1373	6.97367	6.66151	9.01782	11.704	2.06188	3.0299	1.31307	10.4278
IGDB02713	IGDB02713.1	0.021089	0.042239	0.0247805	0.04717	0.119916	0.659038	1.96756	1.63783	1.63668	1.53855	1.17667
IGDB02713	IGDB02713.2	0	0	0	0.0064215	0	0	0	0	0	0.002883	0
IGDB02713	IGDB02713.3	0	0	0	0	1.6775	8.54278	13.7025	15.0145	6.34513	5.15135	12.3378
IGDB02713	IGDB02713.4	0	0	0	0	0.148007	0.198387	0.621246	0.802858	0.320139	2.52124	2.72839
IGDB02717	IGDB02717.1	0	0	0	0	0	0	0	0	0	0	0
IGDB02717	IGDB02717.2	0	0.0122995	0.0889985	0.0191295	0.124887	0.0794105	0.152423	0.546162	0.799043	1.35115	0.756844
IGDB02717	IGDB02717.3	0	0	0	0	0.114935	0	0.0260785	0	0.213789	0.280995	0.61011
IGDB02717	IGDB02717.4	0	0	0.100332	0	0	0	0.005486	0.435929	1.30119	0.046684	0.014285
IGDB02719	IGDB02719.1	3.21569	2.47207	5.55573	1.99649	1.28306	13.8689	20.0558	17.829	10.2388	4.99296	1.86136
IGDB02719	IGDB02719.2	0	1.93621	0	2.19599	12.7723	34.1538	38.0012	24.8209	13.3336	11.7269	12.5701
IGDB02757	IGDB02757.1	0	0	0	0.193767	1.77346	4.98819	6.90081	7.42244	3.96323	3.61513	1.58603
IGDB02757	IGDB02757.2	0.0191655	0	0.0142255	0.0191765	0.087491	0.77569	1.18177	2.0501	5.33437	1.37745	0.457755
IGDB02757	IGDB02757.3	0.007395	0.0196055	0.021011	0.133824	0.483996	1.61306	3.25693	3.23225	2.50514	1.98684	1.19813
IGDB02768	IGDB02768.1	0	0	0	0	0	0.700542	0.118446	0.125907	0.450918	0.595982	0.404578
IGDB02768	IGDB02768.2	0.047656	0.0563515	0.144025	0.5117	1.48806	0.234358	0.460536	1.09739	0.698631	0.801144	4.52861
IGDB02768	IGDB02768.3	0	0	0	0	0.0054445	0.400037	0.828882	0.403089	0.656953	0.580233	9.82946
IGDB02806	IGDB02806.1	0	0	0	0	0.042382	2.34298	5.49935	12.2163	11.8792	8.33416	3.43859
IGDB02806	IGDB02806.2	0	0	0	0	0.393668	1.50644	0	0	0	0	0
IGDB02806	IGDB02806.3	0	0	0	0	0	0	0	0	0	0	0
IGDB02806	IGDB02806.4	0.0677555	0.137103	0.120718	0.256141	0.478938	0	0	0	0	0	0
IGDB02840	IGDB02840.1	0	0.258065	0.264387	0.634459	0.0703035	1.20341	0.298739	0.682833	0.616767	0.41944	0.734139
IGDB02840	IGDB02840.2	0.342713	0	0.0037965	0	0.962098	0.155908	1.29329	1.9197	1.17655	1.30909	0.666173
IGDB02840	IGDB02840.3	1.0728	0.736065	0	0	0	0	0	0.198157	0.470253	0.433366	0.334384
IGDB02840	IGDB02840.4	0	0	0	0	0	0	0	0	0	0	0
IGDB02850	IGDB02850.1	15.8348	37.5614	169.857	138.983	143.125	327.636	431.433	146.269	409.182	328.827	208.509
IGDB02850	IGDB02850.2	0	0	0	0.642447	0	0.0330585	0	0	0	0	0
IGDB02850	IGDB02850.3	20.5738	50.1591	329.747	537.37	502.316	420.425	360.204	286.542	262.264	296.5	321.594
IGDB02852	IGDB02852.1	0	0.073327	0.0943335	0.0073605	0.511345	0.580921	0.0537885	3.2781	2.39923	2.13349	0.630385
IGDB02852	IGDB02852.2	0	0	0	0.0349445	0.101699	0.130721	1.59661	1.67176	2.07928	2.19535	3.42599
IGDB02852	IGDB02852.3	0	0.014568	1.00021	1.15835	8.50234	53.0035	62.5197	111.342	132.501	133.555	79.0883
IGDB02857	IGDB02857.1	12.038	14.7288	22.358	14.9671	18.2316	18.3151	13.0846	10.4253	6.65034	8.27355	8.85164
IGDB02857	IGDB02857.2	22.8983	21.2834	14.0979	14.7018	18.0072	12.1549	14.4005	11.2758	8.68143	9.59621	9.54005
IGDB02871	IGDB02871.1	3.86097	2.27718	0	0.466668	1.25255	0.469058	0.189674	0.659084	0.618455	0.784714	2.05715
IGDB02871	IGDB02871.2	2.31099	2.02679	0.102475	0.0827125	0.509485	0.780362	0.767243	0.609307	0.940673	1.30084	0.581997
IGDB02871	IGDB02871.3	0.409901	0	0	0	0	0	0	0	0	0	0
IGDB02881	IGDB02881.1	2.44664	1.06197	0.326817	0.864018	0.27254	0.395717	0.746358	0.553063	0.917436	0.788395	0.928496
IGDB02881	IGDB02881.2	25.6379	13.4687	2.77119	0.0601775	3.28617	4.02783	6.31531	7.1001	7.31644	8.44558	7.48022
IGDB02881	IGDB02881.3	0.777517	0.020148	0.299296	0	0.185805	0.177859	0.234142	0.022521	0.2578	0.00795	0.314061
IGDB02881	IGDB02881.4	0	0.012914	0.0050325	0	0	0	0	0	0	0	0
IGDB02923	IGDB02923.1	0.171248	0.119923	0.349094	0.321198	1.70988	0.663571	2.13637	0.267037	0.366447	0.750292	0.670349
IGDB02923	IGDB02923.2	0.486345	0.0759095	0.331784	2.93998	3.55903	5.86241	6.34989	7.46559	8.41613	7.7841	7.60048
IGDB02973	IGDB02973.1	0	0	0	0	0.011242	0.259166	0.122535	1.38069	1.0766	2.2353	8.2728
IGDB02973	IGDB02973.2	0	0	0	0	0.018363	0.165607	0.446464	0.398089	0.703983	0.524173	1.73924
IGDB03003	IGDB03003.1	0	0	0	0	0.014647	0	0	0	0	1.83883	0
IGDB03003	IGDB03003.2	0.235481	0.13603	0	0.118336	0.923866	0.991933	1.31697	1.34628	1.32258	1.86486	1.55851
IGDB03003	IGDB03003.3	0.247	0.238523	0	0	0	0	0.567684	0.823079	1.40532	0.711271	1.01018
IGDB03004	IGDB03004.1	1.31583	1.03639	0.0802575	0.844696	0.372408	0.15034	0.310557	2.0255	2.14714	1.17089	0.177786
IGDB03004	IGDB03004.2	0	0	0.294873	0.337233	0.164256	0.369471	0.398462	0.096414	1.38094	1.06115	0.667322
IGDB03012	IGDB03012.1	0.128366	0.074493	0.0567605	0.124905	0.918295	0.821179	1.0803	0.536604	0.296716	0.460437	0.16703
IGDB03012	IGDB03012.2	0	0.0507695	0.168605	4.04859	7.9768	7.82182	10.8392	13.1393	6.86985	7.24185	6.57672
IGDB03012	IGDB03012.3	0	0.0573855	0	0.149192	0.0518865	0.127648	0.075585	0.104235	0.0288685	0.0205215	0.0072195
IGDB03040	IGDB03040.1	9.01179	2.75431	4.37038	3.44492	2.21337	2.02616	2.38233	1.26941	1.12396	1.20123	3.14663
IGDB03040	IGDB03040.2	0	0	0	0.004539	0.639512	1.85015	2.05051	1.1014	0.313752	0.632362	0.358297
IGDB03040	IGDB03040.3	0	0	0.521772	0.387425	0.861055	7.92458	10.4101	15.5795	14.547	10.4745	2.56244
IGDB03040	IGDB03040.4	51.1199	14.4666	0	3.52312	9.17361	9.69335	10.1625	9.59697	3.72389	4.55979	6.63662
IGDB03081	IGDB03081.1	3.75121	1.57183	4.90039	3.9194	6.56766	9.6855	10.1039	8.1754	4.62318	5.09095	2.72437
IGDB03081	IGDB03081.2	0	1.74817	9.03634	5.91064	7.84682	11.3756	9.86751	5.46879	3.59154	2.54627	1.92314
IGDB03105	IGDB03105.1	0	0	0	0	0	0	0	0	0	0	0
IGDB03105	IGDB03105.2	1.23603	0.388337	0.06445	0.212856	0.855148	1.79083	2.44082	5.44463	6.97276	2.59127	1.37085
IGDB03105	IGDB03105.3	0.888718	0.641011	0.102781	0.339046	0.327087	1.2482	1.81684	2.11819	1.09518	2.37576	0.600526
IGDB03105	IGDB03105.4	0	0	0	0	0	0	0	0	0	0.054255	0
IGDB03115	IGDB03115.1	0.0599765	0.112504	0.852058	1.78346	4.45871	3.94046	5.37177	7.98695	5.63879	5.34026	3.52642
IGDB03115	IGDB03115.2	0	0	0	0	0.104299	0.149738	0.103271	0.254509	0.258196	0.131506	0.125212
IGDB03115	IGDB03115.3	0	0	0.196101	7.69974	25.1156	34.9384	26.8571	19.2537	16.9642	10.5952	6.55927
IGDB03115	IGDB03115.4	0	0	0	0.0614725	0.205701	1.27383	0.500966	0	0.054731	0	0
IGDB03115	IGDB03115.5	0	0.0139395	0.13721	0.646448	1.13393	2.34144	1.40667	1.3262	1.72682	0.603422	0.860613
IGDB03122	IGDB03122.1	0.0108425	0.408695	0.058904	0.433391	0.947324	0.39644	1.24605	2.69688	1.59869	3.19854	1.37574
IGDB03122	IGDB03122.2	0	0	0	0.231794	0.954525	7.70182	12.6225	10.5919	8.31141	4.71039	2.06603
IGDB03122	IGDB03122.3	0	0	0	0	0	0	0	0	0	0	0
IGDB03122	IGDB03122.4	0	0.052487	0	0	0.0215975	0.016424	0.497848	0.032393	0.177963	0.0944145	0.0098745
IGDB03123	IGDB03123.1	0	0	0	0	0	0	0	0	0	0	1.09204
IGDB03123	IGDB03123.2	0	0	4.71437	0	0	0	0	0	0	0	1.22992
IGDB03123	IGDB03123.3	0	0	0	0	0	0	0	0.011913	0	0	0
IGDB03123	IGDB03123.4	0	0	0	0	0	0	0	0	0	0	0
IGDB03123	IGDB03123.5	0	0	0	0	0	0	0	0	0	0	0
IGDB03123	IGDB03123.6	0	0	0	0	0	0	0	0	0	0	2.9023
IGDB03123	IGDB03123.7	6.38499	7.36021	3.37206	6.46056	7.08209	6.86335	5.2078	3.88682	1.81305	1.92964	0.0053775
IGDB03123	IGDB03123.8	0.537381	0.82267	12.9448	0.564257	0.821871	0.969112	0.31729	0.195652	0.266156	0.495897	7.92029
IGDB03145	IGDB03145.1	0	0	0.177191	0.0487605	0.46363	0.761481	0.890278	0.49375	1.09317	0.391857	0.225293
IGDB03145	IGDB03145.2	0	0.0625435	0.179975	0.755112	2.32381	2.56299	3.4336	8.54294	7.47649	7.4103	8.13418
IGDB03145	IGDB03145.3	0.0154665	0	0.005005	0.733567	0.643134	0.971176	1.54368	2.08244	3.50915	2.70047	4.48389
IGDB03163	IGDB03163.1	0.24171	0.615437	0.043204	0.064017	1.07098	6.57815	8.34944	12.8488	8.43022	5.73103	8.71082
IGDB03163	IGDB03163.2	0	0.042587	0	0	0	0.239975	0.362228	0.737244	0	0.264921	0.359513
IGDB03163	IGDB03163.3	0.437406	0.0432015	0	0	0	0	1.59103	1.2186	0.369688	0.837056	2.41284
IGDB03182	IGDB03182.1	0.0760935	0.077282	0.291046	0.152199	3.65836	0.51144	0.127851	0.195549	0.400189	0.136195	0.274674
IGDB03182	IGDB03182.2	0	0	0.049972	14.4458	17.1879	12.6107	11.4532	7.68446	3.71833	4.28011	2.28287
IGDB03188	IGDB03188.1	0	0	0.009048	0	0.060978	0.202141	0.276425	0	0	0.585089	1.28916
IGDB03188	IGDB03188.2	0	0	0	0	0	0	0.25776	0.759209	0.760663	0.47312	1.28717
IGDB03198	IGDB03198.1	0	0.093311	0.0488085	0.210377	0.242565	0.623417	1.36631	1.92654	2.57764	1.39131	1.30987
IGDB03198	IGDB03198.2	0	0	0	0.047478	1.02024	2.24528	3.51367	4.27673	9.24859	8.40813	2.54061
IGDB03205	IGDB03205.1	0	0	0	0	0.248742	0.447261	0.397729	0.873269	2.1428	2.30641	3.61364
IGDB03205	IGDB03205.2	0	0.0711745	1.97319	0.890701	0.326279	0.302553	0.427523	0.55671	0.86	1.10945	1.63066
IGDB03206	IGDB03206.1	0.0360785	0.051812	0.116658	1.22256	16.6559	15.4564	13.8375	19.392	56.7948	58.1858	42.8924
IGDB03206	IGDB03206.2	0	0	0.581414	0.215712	1.37055	0.899423	0.523382	1.36548	0.848951	0.809026	1.33088
IGDB03248	IGDB03248.1	1.09016	0.837051	0.229267	0.506502	0.076023	0.0545075	0.141939	0.905431	0.230034	0.263522	0.109855
IGDB03248	IGDB03248.2	0.371055	1.18917	0	0	0	0	0	0.005537	1.41854	1.34781	3.81911
IGDB03277	IGDB03277.1	0.021107	1.54917	0.025832	0.079059	0.0197595	0.013885	0.123171	0.276081	0.143708	0.304036	0.367966
IGDB03277	IGDB03277.2	0.00614	3.35194	0.107535	0.0097	0	0.016233	0	0.139656	0.186732	0.142346	0.243711
IGDB03278	IGDB03278.1	0.648306	0.77327	3.69774	3.1714	4.7605	10.1496	4.93135	9.08989	10.81	2.36697	3.36594
IGDB03278	IGDB03278.2	21.3762	13.2077	3.60795	11.0113	16.3076	10.3748	16.978	13.1369	3.60751	1.97387	1.23661
IGDB03330	IGDB03330.1	0	0.066985	0.0163755	0.047228	0.260152	0.268798	0.0437485	1.51635	1.95236	1.36443	0.678626
IGDB03330	IGDB03330.2	0	0	0	0	0	0.137154	0.250348	0.584816	0.693481	0.73386	0.121812
IGDB03330	IGDB03330.3	0	0	0	0	0	0	0.204865	0.949898	1.61256	1.56085	0.232346
IGDB03330	IGDB03330.4	0	0	0	0	0	1.23761	1.99635	1.62171	1.15948	1.60088	0.640583
IGDB03348	IGDB03348.1	0.25059	0.597951	0.136046	0.0620365	0.038282	0.176306	0.327031	10.9425	20.631	21.2157	3.82761
IGDB03348	IGDB03348.2	0.0820475	0.115278	0.056246	0.014502	0.0606275	0.137916	0.890382	5.34181	14.8642	16.0924	2.46363
IGDB03349	IGDB03349.1	0.015013	0.0548925	0.038354	0.0108645	0.029879	0.402794	0.349699	2.67987	1.1378	1.08136	0.434874
IGDB03349	IGDB03349.2	0	0	0	0.0451845	0.07031	0.0910595	0.864962	2.14362	2.40072	1.65178	0.333773
IGDB03362	IGDB03362.1	0	0	0	0.075245	0	0	0	0.569998	5.60803	5.59562	4.6851
IGDB03362	IGDB03362.2	0.02067	0.031677	0.0328795	0	0.11398	0.125855	0.121665	0.249355	0.003344	1.78264	0.495982
IGDB03381	IGDB03381.1	0.101588	0.083973	0.058706	0.083512	0.406469	1.5245	3.64231	9.23849	7.68397	3.99341	1.36596
IGDB03381	IGDB03381.2	0	0	0	0.238508	0.131895	0.488621	1.02858	0.358945	0.933407	0.967439	0.153333
IGDB03405	IGDB03405.1	0.009829	0.028596	0.034332	0.0816625	0.0396165	0.354865	1.47139	0.227818	1.11956	1.49734	0.459658
IGDB03405	IGDB03405.2	0	0	0	0	0	0	0	0.269198	0	1.53156	0.157334
IGDB03405	IGDB03405.3	0	0	0	0	0	0.782614	1.82164	9.00389	9.03735	3.00749	0.850035
IGDB03446	IGDB03446.1	0	0.085963	0.006178	0.0016255	0.0499915	0.0614695	0.002304	0.0011525	0.00021	0.003064	0.47566
IGDB03446	IGDB03446.2	3.52808	3.60093	3.76702	4.06319	1.95715	2.87597	3.79713	0.232045	3.96284	0.0541315	1.78463
IGDB03446	IGDB03446.3	14.6396	15.909	52.5646	18.9766	23.1776	16.072	21.2221	20.145	18.5784	35.5579	7.63756
IGDB03446	IGDB03446.4	1.50611	2.96362	3.14489	3.77584	0.763604	2.69672	1.51162	6.59325	0.569469	5.82157	0.749468
IGDB03446	IGDB03446.5	25.4912	29.4031	24.6026	30.9824	22.4267	25.5833	44.0346	11.2344	24.6064	9.60521	14.9739
IGDB03519	IGDB03519.1	0	0.023052	1.9161	0	0.735743	0.693288	2.55098	6.69906	5.11556	1.95226	3.19519
IGDB03519	IGDB03519.2	6.32389	3.76716	1.14843	2.64713	2.3853	2.4473	3.32945	3.02769	3.1719	1.67859	1.98568
IGDB03519	IGDB03519.3	0	0	0	0	0	0	0	0	0	0	0
IGDB03560	IGDB03560.1	0	0.057711	0.157736	0.106535	0.038203	0.261678	0.630634	1.89042	1.86986	1.86693	0.447208
IGDB03560	IGDB03560.2	0	0	0	0	0	0	0	0	0	0	0
IGDB03560	IGDB03560.3	0.456363	0.247504	0	0.03254	0.0296255	0.0695675	0.294362	1.50468	1.98672	2.13716	0.483872
IGDB03584	IGDB03584.1	1.43294	1.2805	2.35135	19.3926	27.5881	7.54272	11.6897	12.7125	10.2816	12.2405	6.39933
IGDB03584	IGDB03584.2	0.610733	1.08585	8.00006	28.0223	41.815	59.4921	53.3408	54.1318	39.441	36.1164	30.6134
IGDB03648	IGDB03648.1	0.586676	1.37306	0.28577	0.191281	0.139582	0.662042	0.327107	0.30185	0.351144	0.162355	0.630395
IGDB03648	IGDB03648.2	4.2906	1.78695	0.052028	0.0921805	0.074617	0.129978	0.999442	2.84939	3.01158	2.1905	0.162424
IGDB03648	IGDB03648.3	0	0	0	0	0	0	0.389887	0	0.346831	0	0
IGDB03653	IGDB03653.1	0	0	10.3964	3.07266	0.933717	0.899433	0.885509	0.815028	3.10902	5.94213	2.25692
IGDB03653	IGDB03653.2	0	0	9.04273	3.40204	1.02386	0	0.691799	1.87674	3.71622	7.13185	17.3498
IGDB03653	IGDB03653.3	0	0	0	0.236455	0	0.0999735	0	0	0	0	0.191131
IGDB03653	IGDB03653.4	0	0.221431	0	0	0	0	0	0	0	0	0
IGDB03673	IGDB03673.1	0	0	0	0	0	0	0	0.151202	3.05795	0.503087	1.1779
IGDB03673	IGDB03673.2	0.0377315	0	0	0	0	0	0.0284215	0.776215	1.89001	3.97944	0.669865
IGDB03685	IGDB03685.1	0	0	0.11863	0.235103	0.212419	0.300484	0.433756	0.2125	0.318787	0.311746	0.337089
IGDB03685	IGDB03685.2	0	0	0	0	0	0.131914	0.186789	0.945025	1.11814	0.554439	0.387898
IGDB03685	IGDB03685.3	0	0	0	0	0	0.11156	0.317501	0.518273	0.787273	0.619422	0.252075
IGDB03685	IGDB03685.4	0	0	0.046676	0.0786035	0.021212	0.125986	0.355054	0.535032	0.54893	1.28928	0.770223
IGDB03685	IGDB03685.5	0	0	0.113008	0.0301205	0.011695	0.131925	0	0.646663	1.75554	1.3591	0.783173
IGDB03685	IGDB03685.6	0.101928	0.15909	0.219764	0.108306	0.168839	0.148767	0.169144	0	0	0	0.320408
IGDB03695	IGDB03695.1	0.365989	0	0.001997	0	0	0	0.018712	0	0.0063175	0	0
IGDB03695	IGDB03695.2	13.2069	8.5613	5.96296	6.33948	7.85439	7.14853	13.4583	11.0404	6.86767	10.2825	5.47327
IGDB03695	IGDB03695.3	52.617	28.6656	5.38648	1.85953	6.07695	9.76885	8.16377	8.80063	8.0846	7.04638	4.92901
IGDB03725	IGDB03725.1	0	0	2.54831	0.0971405	0.131391	0.070557	0.0531375	0.137663	0.0109545	0	0
IGDB03725	IGDB03725.2	8.56614	9.24807	0	0.27759	0.504185	0.218857	0.371413	0.118593	0.248788	0.168556	0.631528
IGDB03847	IGDB03847.1	0.116638	0.075565	1.31491	2.09659	1.08054	0.710125	0.61639	0.591302	0.96833	0.354116	0.613207
IGDB03847	IGDB03847.2	0	0	3.11015	6.17046	3.30901	2.47416	2.04746	1.73516	3.2	3.53927	2.2059
IGDB03873	IGDB03873.1	0	0.081049	0	0	0.0764565	0.410376	0.111416	0.652682	3.23642	2.02461	0.949367
IGDB03873	IGDB03873.2	0	0	0	0	0	0	0.230127	0	0.52232	3.62851	2.99213
IGDB03923	IGDB03923.1	0	0.0225725	0.0130065	0	0.061462	0.096771	0.228443	0.600561	1.45531	0.817826	0.57988
IGDB03923	IGDB03923.2	0	0	0	0	0.013369	0	0.102572	3.72973	4.84149	2.98054	0.576927
IGDB03927	IGDB03927.1	0	0	0.595127	0.401525	0.564386	0.0355605	3.66197	17.3595	18.4565	19.6951	5.73564
IGDB03927	IGDB03927.2	6.34571	6.68105	0	0	0	2.85147	3.61617	3.30404	6.39031	2.69633	0
IGDB03934	IGDB03934.1	0	0	0	0	0	0	0	0	0	0	0
IGDB03934	IGDB03934.2	2.18008	0.751684	0.432654	0.505861	0.541635	0.397354	0.586236	0.91896	1.26035	1.24107	1.67899
IGDB03934	IGDB03934.3	0.765996	0.344887	0.551744	1.29565	1.0457	2.20168	2.09616	2.12089	1.21444	1.4914	1.20089
IGDB03934	IGDB03934.4	0	0	0.002628	0.0034675	0.002846	0.0068	0.00762	0.0213845	0.0026875	0.010017	0.005664
IGDB03935	IGDB03935.1	0	0	0.01155	0	0.016618	0.317897	0.146977	0	0.542144	0.18389	17.5026
IGDB03935	IGDB03935.2	0	0	0.0119275	0.098656	0.036128	0.0579585	0.0984475	0.223892	0.110283	0.291694	1.10469
IGDB03952	IGDB03952.1	0	0.133185	0	0.035483	0.012039	0.1175	0.521564	0.0076845	0.000181	0.052586	0.006063
IGDB03952	IGDB03952.2	0	0.04842	0	0.029441	2.17083	5.14405	2.97043	1.03005	0.402998	0.520142	0.065812
IGDB03952	IGDB03952.3	0	0.653215	0	0	1.33982	2.86882	3.87724	2.27409	1.53315	0.639391	0.142911
IGDB03988	IGDB03988.1	1.30868	1.53975	0.284575	0.248104	0.250725	1.24919	1.52661	2.48015	1.7103	2.3949	0.655482
IGDB03988	IGDB03988.2	12.4161	5.62198	0.120797	1.24579	1.86707	1.73663	4.7777	2.00266	1.73413	1.51296	1.03692
IGDB03994	IGDB03994.1	1.41265	0.76211	0.104329	0	0.007786	0.055882	0	0.226429	0.9559	0.757073	0.807704
IGDB03994	IGDB03994.2	0.019711	0.0654205	0.20079	0.0811435	0.0528045	0.089316	0.198985	1.09562	6.25106	4.01897	1.48376
IGDB04004	IGDB04004.1	0	0.0877765	16.1511	0.216134	17.2007	0.037259	0	0.019518	0.008135	0	0.00474
IGDB04004	IGDB04004.2	0.576535	0.781326	0.760451	0.394458	2.31834	3.82723	6.04208	6.44267	3.07271	2.50424	0.89973
IGDB04004	IGDB04004.3	0	0.01231	0	0	1e-06	7.87967	7.035	6.47564	7.59296	6.08027	2.07131
IGDB04004	IGDB04004.4	0.338111	0.918407	8.26875	4.36756	8.15978	15.1006	13.8996	11.1224	6.1559	3.12593	4.02201
IGDB04004	IGDB04004.5	0	2.24342	24.334	12.2417	0	20.0806	19.6231	12.5302	7.39234	5.31298	2.58904
IGDB04015	IGDB04015.1	0.016969	0.245236	1.28406	1.48647	1.2845	0.797115	0.509348	0.158248	0.235634	0.08422	0.21278
IGDB04015	IGDB04015.2	0	0.117883	0.961252	3.71118	3.21204	3.08621	2.29877	1.48796	0.730568	0.863839	0.570866
IGDB04015	IGDB04015.3	0	0	0	0.0072145	0.007172	0.0048675	0.0153735	0.0037495	0	0.004982	0
IGDB04025	IGDB04025.1	0.462778	0.439122	7.43819	4.57567	3.29186	2.30498	3.56978	2.02599	1.08375	0.115092	0.804655
IGDB04025	IGDB04025.2	0.167527	1.40751	28.6489	79.3798	45.6808	15.8766	5.96565	4.1216	2.57645	4.01441	3.69499
IGDB04025	IGDB04025.3	0.104679	0	0.280993	0.08897	0.0115125	0.0448575	0.446367	0.399252	0.111333	0.0002475	0.013716
IGDB04039	IGDB04039.1	6.01839	10.2851	6.03054	13.965	17.9079	36.1298	33.7629	83.6618	93.9691	59.5799	100.624
IGDB04039	IGDB04039.2	0	24.3236	40.3071	26.4912	34.0386	52.7051	55.5967	49.5969	79.2404	97.3917	66.3829
IGDB04039	IGDB04039.3	23.7897	0.808878	35.5909	123.004	210.605	176.571	168.721	194.531	298.083	282.075	169.148
IGDB04071	IGDB04071.1	29.3868	40.0109	82.5059	87.5343	90.2231	68.1608	49.0777	38.6	19.5376	22.5787	18.5716
IGDB04071	IGDB04071.2	168.978	165.377	38.4544	23.3234	18.4898	9.38455	18.8514	13.6387	11.7472	10.1394	11.601
IGDB04074	IGDB04074.1	0.102044	0.16116	0.943093	1.71544	0.417234	0.106815	0.697704	0.599731	0.396033	0.180971	0.661238
IGDB04074	IGDB04074.2	0.196511	0.138819	0.839044	0.746923	0.59774	0.495093	0.536143	0.795288	1.18134	0.913597	1.08078
IGDB04074	IGDB04074.3	0.0003665	0	0	0.0330565	0.077711	0.0079265	0	0.0142725	0.0319025	0.0387825	0.134824
IGDB04115	IGDB04115.1	0.348382	0.158887	0.3973	1.1311	0.565479	0.651494	0.768733	1.373	1.67181	1.83754	1.24923
IGDB04115	IGDB04115.2	24.9311	31.4596	1.65132	0	0	0.0002605	0	0	0	0	1.42692
IGDB04142	IGDB04142.1	0	0	0.774998	1.18803	2.43183	0	0.379211	0.217653	0.112325	0	0
IGDB04142	IGDB04142.2	0	0.232597	0.644037	1.8423	0.162191	1.28805	0.812811	0.731685	0.870973	1.30327	0.248754
IGDB04143	IGDB04143.1	0	0	0.033558	0.014826	0.078664	1.40866	0.921631	0.220809	2.24728	0.518245	1.55684
IGDB04143	IGDB04143.2	0	0	0.056679	0.258422	0.561789	0.236254	0.774189	1.52126	0	3.03742	1.54093
IGDB04238	IGDB04238.1	0	0.408957	0.0148515	0.15978	0.216981	0.023645	0.0370845	0.626791	0.0577515	0.028098	2.30235
IGDB04238	IGDB04238.2	2.97992	0.924712	0	0	0.450057	2.03812	1.90091	0.968041	3.22072	3.5247	0.439759
IGDB04275	IGDB04275.1	0.336039	0.364785	0	0	0	0.631792	3.88722	13.9853	18.5244	18.1729	3.55278
IGDB04275	IGDB04275.2	0.649291	1.54811	0.481224	0.754196	1.73779	3.64884	7.71673	17.1029	24.6111	13.3516	9.78701
IGDB04275	IGDB04275.3	0	0	0	0	0	1.51288	0	0	9.86277	0	5.24708
IGDB04275	IGDB04275.4	2.95944	2.26288	0.105637	1.29123	3.56997	7.0437	22.2818	45.6289	33.343	44.8667	11.4135
IGDB04279	IGDB04279.1	6.8072	7.18405	0.137265	0.101307	0.308901	1.00667	1.51919	2.16825	3.32582	2.77276	1.42665
IGDB04279	IGDB04279.2	0	0.234286	0	0	0	0.1258	0.401338	0.820989	0.617929	1.1659	0.545928
IGDB04279	IGDB04279.3	0.022103	0	0	0	0.112607	0.522494	1.27115	1.85359	2.69164	1.43334	0.963484
IGDB04279	IGDB04279.4	0	0.0238195	0	0.155226	0	0.114513	0.173479	0.72275	0.788719	1.80453	0.274294
IGDB04279	IGDB04279.5	0.555064	0.688649	0.0654125	0	0.194308	0	0	0	0.506085	0.524147	0.379007
IGDB04279	IGDB04279.6	19.2089	19.4247	0.455751	0	0.00344	0.0004175	0.0087265	0.005275	0.012508	0.020869	0
IGDB04327	IGDB04327.1	187.275	160.837	33.1475	1.51121	0.064681	0.093598	0.034662	0.022045	0	0.0342	76.7899
IGDB04327	IGDB04327.2	33.125	23.1677	0.861675	0.177204	0.131263	0.051713	0.0172445	0	0.038211	0.005475	20.843
IGDB04337	IGDB04337.1	2.8924	3.49113	0.613276	0.303356	0.142904	0.457759	0.542131	0.231002	0.456555	0.681308	0.969427
IGDB04337	IGDB04337.2	4.6714	4.91006	0.070288	0.0388525	0.185392	0	0.0907725	0	0.554135	0.342411	0.590881
IGDB04353	IGDB04353.1	2.53055	2.83273	0.219914	0.445869	0.363056	0.177428	0.102611	0.0598445	0.124405	0.117089	0.04508
IGDB04353	IGDB04353.2	1.04235	1.19097	0.251626	0.738073	0.14348	0.174475	0.060586	0.0151895	0.014757	0.0066915	0.0486485
IGDB04414	IGDB04414.1	0.038499	0.781116	2.23948	1.86387	2.52075	1.31325	0.012177	1.86041	3.77878	3.4002	1.23013
IGDB04414	IGDB04414.2	0	0	0	0	0	0.000956	0.0039265	0.009184	0	0.009794	0
IGDB04414	IGDB04414.3	0	0	0.0033365	0.006801	0	0.255196	0.408575	0.366602	0.063759	0.0863415	0.123299
IGDB04414	IGDB04414.4	0	0	0	0	0	1.28712	3.8148	2.88412	0	0	1.28643
IGDB04508	IGDB04508.1	0	0	0.0407255	0.177256	0	0.074485	0.126321	0	0.0730935	0.034658	0
IGDB04508	IGDB04508.10	0	0	0	0	0	0	0	0	0	0	0
IGDB04508	IGDB04508.2	0	0	0	0	0	0	0	0	0	0	0
IGDB04508	IGDB04508.3	0	0	0.000552	0	0.0051455	0.0095505	0.0155485	0	0	0.00602	0.0224425
IGDB04508	IGDB04508.4	0	0.077564	0.485849	0.171371	0.477265	1.24532	0.504788	0.900663	1.37014	0.647714	1.3267
IGDB04508	IGDB04508.5	0	0	0.0119565	0.000649	0.002811	0.007467	0.0147395	0.010533	0.010771	0.002895	0
IGDB04508	IGDB04508.6	0	0.0756585	0.18676	2.841	0	0.338894	0.68152	0.002978	0.655136	2.66478	3.54658
IGDB04508	IGDB04508.7	0	0	0.001378	0.000427	0.002981	0.002613	0.0113535	0.005202	0.010484	0.006637	0.0136295
IGDB04508	IGDB04508.8	0	0	0	0	0.0070055	0	1.51699	0.003521	0	0	0
IGDB04508	IGDB04508.9	0	0	0	0	0	0	0	0	0	0	0
IGDB04543	IGDB04543.1	27.5041	26.4062	0.0984905	0	0.272862	0.283747	0.200884	0.529371	1.23194	0.621893	3.2796
IGDB04543	IGDB04543.2	2.26169	1.87036	0.117395	0.100685	0.170967	0.144103	0.112609	0.136042	0.0274675	0.396747	0.591078
IGDB04585	IGDB04585.1	0	0.037726	0.296632	1.04854	0.322339	1.0103	1.56694	1.09165	2.70292	0.340192	3.04986
IGDB04585	IGDB04585.2	0	0	1.98038	2.36611	2.84957	0.452016	0.0240245	0.917798	0.028363	6.62569	0.916685
IGDB04595	IGDB04595.1	0	0.704572	0.636911	1.57069	3.022	3.59757	5.77849	5.70247	4.90752	6.59469	2.61588
IGDB04595	IGDB04595.2	0	0.325226	0.376802	6.40377	7.95389	9.0862	11.9562	11.5845	10.2832	10.5529	4.24893
IGDB04605	IGDB04605.1	0.0195605	0	0.600574	0	1.15426	5.1623	6.11343	9.29092	13.2566	4.72447	3.8173
IGDB04605	IGDB04605.2	1.24637	1.62729	2.85528	12.6875	11.6076	11.4613	6.57932	11.994	8.92863	12.8034	5.56977
IGDB04605	IGDB04605.3	0	0	0.017431	0.356562	3.61682	5.93304	13.2971	15.8677	11.8021	2.72782	2.47561
IGDB04605	IGDB04605.4	4.42959	4.54553	3.36729	4.47487	17.7189	28.3488	33.682	43.6079	52.835	42.7924	26.3552
IGDB04609	IGDB04609.1	0.218214	0.141008	0.642734	0.006693	2.11695	9.78479	15.7258	9.45793	4.40271	4.89363	2.02381
IGDB04609	IGDB04609.2	0	0	1.42902	4.91556	8.85307	8.40233	9.20296	9.16005	7.18926	10.3482	16.9462
IGDB04632	IGDB04632.1	0	0.033854	0	0.101427	0.9756	0.280083	0.150238	0	0	0	0.351961
IGDB04632	IGDB04632.2	2.38298	0.878653	0.071059	0	0.08005	1.23767	0.495642	1.88018	3.18042	2.25928	2.23076
IGDB04632	IGDB04632.3	0	0	0	0	0.0076525	0.0108105	0.011535	0.0288485	0.0567535	0.006171	0.0141335
IGDB04632	IGDB04632.4	3.14006	2.68738	0.185763	0.460695	0.485111	0.597162	1.29015	2.2801	2.8227	2.71508	2.79331
IGDB04632	IGDB04632.5	0	0	0	0	0	0.24203	0.0020725	0.0310255	0	0.001661	0.0011645
IGDB04663	IGDB04663.1	5.14569	6.27144	3.7046	9.66226	13.7256	12.2192	8.85734	9.61612	6.02697	6.12472	3.99639
IGDB04663	IGDB04663.2	15.4083	17.8069	5.58442	6.21264	4.17372	3.62195	5.20433	6.3401	2.57621	4.22599	4.3714
IGDB04678	IGDB04678.1	1.69602	2.30548	0.121946	0.267653	0.0225475	0.20027	0	0	0.088242	0	0.718844
IGDB04678	IGDB04678.2	15.8698	13.0449	0.953336	0.077631	0.091788	0.106053	0.13164	0.100668	0.364963	0.536763	0.796758
IGDB04683	IGDB04683.1	4.16151	10.6282	10.3151	3.31896	6.62083	7.11563	3.45233	9.17668	7.59591	8.18687	5.80086
IGDB04683	IGDB04683.2	0.352727	1.32061	3.37837	2.41239	0.605462	1.14839	6.84312	1.3827	0.469606	0.467031	1.64175
IGDB04703	IGDB04703.1	0	6.9546	1.01533	1.11453	0.100674	3.14254	4.86029	6.00974	3.45482	2.18896	1.39507
IGDB04703	IGDB04703.2	3.12786	2.23976	1.05389	0.289025	0.786575	0	0.11178	0.0254395	0.043363	0.021691	0.0445715
IGDB04718	IGDB04718.1	0.012461	0.0043165	0	0	0.085222	0.0937625	0.0809465	0.263443	0.232411	0.235966	0.0730655
IGDB04718	IGDB04718.2	0.0528085	0.0351805	0	0	0.0126485	0.534402	0.803765	0.660096	1.70089	3.57001	4.46014
IGDB04718	IGDB04718.3	0.395867	0	0	0	0.097391	3.42263	4.20324	6.88645	14.6026	15.078	24.4318
IGDB04724	IGDB04724.1	0.016936	0.015015	0	0	0	0.128441	0.268101	0.994017	1.55741	1.15014	0.022782
IGDB04724	IGDB04724.2	0.0088915	0.0372955	0	0.0437195	0.040833	0.044785	0.170471	0.694118	1.27535	0.753394	0.434438
IGDB04725	IGDB04725.1	0	0	0.304934	2.40724	0	1.20965	2.32512	6.64243	9.01073	6.7565	2.51703
IGDB04725	IGDB04725.2	1.22952	1.74731	0.23443	1.24133	1.6539	1.32117	1.43328	4.33045	7.50322	5.42949	2.47445
IGDB04738	IGDB04738.1	0.781614	0.550598	0	0.226407	0.454956	0.500409	0.789695	2.17855	2.69334	2.13855	1.08369
IGDB04738	IGDB04738.2	0.105283	0.087305	0	0	0.0144075	0.0249605	0.082495	0.349685	0.402622	0.383304	0.081047
IGDB04738	IGDB04738.3	0.218026	0.170044	0.040437	0	0	0.0068265	0.0832515	0.891657	1.35612	1.6835	0.287969
IGDB04741	IGDB04741.1	0	0	0	0	0.0149875	0	0.024916	0.041391	0.332425	1.44694	1.24942
IGDB04741	IGDB04741.2	0	0	0	0	0.039583	0	0.035894	0.018024	0.190304	1.45052	1.5367
IGDB04766	IGDB04766.1	0	0.033972	0.355999	0	0.0178	0	0.052375	3.16726	9.83131	6.90682	5.46289
IGDB04766	IGDB04766.2	0.0087475	0	0.02919	0	0	0	0.020551	0.483209	2.48811	2.50083	1.03373
IGDB04769	IGDB04769.1	1.43704	0.477353	4.26026	2.3606	1.0082	0.832249	0.9984	0.829707	0.867652	0.824582	0.643477
IGDB04769	IGDB04769.2	0	1.57003	2.781	1.41418	1.43722	0.768776	0.32239	0.431791	0	0	0
IGDB04779	IGDB04779.1	0	0	0.0574565	0.0071995	0.03074	5.8696	15.5456	22.7238	93.4671	51.8286	45.7604
IGDB04779	IGDB04779.2	0	0	0.012532	0	0	0	7.21141	8.39692	0	0	0
IGDB04779	IGDB04779.3	0	0	0.545726	0	0	3.74097	0	0	0	0	50.807
IGDB04779	IGDB04779.4	0	0.00471	0.0577825	0.024346	0.245526	4.06778	5.61181	11.748	17.3284	17.7771	13.2194
IGDB04779	IGDB04779.5	0	0	0	0	0	3.4273	9.43085	54.4715	96.6403	70.8756	89.3386
IGDB04779	IGDB04779.6	0	0	0	0	0	0	0	0	6.48275	3.75755	17.0175
IGDB04779	IGDB04779.7	0	0	0	0	0	2.21442	0.89149	4.25886	8.09202	4.22931	5.42801
IGDB04784	IGDB04784.1	0	0	0.005293	0.767325	1.55305	0.245763	0.513583	0.0824215	0	0.322069	0.303075
IGDB04784	IGDB04784.2	0.008109	0.0008625	1.06643	1.74488	1.44757	0.0059205	0.996973	0.256314	0.178912	0	0.332503
IGDB04784	IGDB04784.3	0.0178	0.0659775	0.359135	0.523346	0.53333	0.363731	0.710879	0.441648	0.015118	0.183852	0.000155
IGDB04784	IGDB04784.4	0	0	0.0725195	0	0.190586	0.110283	0.189326	0.0677775	0.156001	0	0
IGDB04784	IGDB04784.5	0	0	0	0.00075	0.003442	2.29341	0.0025455	0.848197	2.05809	1.81997	0.78361
IGDB04821	IGDB04821.1	2.96904	3.76931	0.777541	1.0716	0.907069	1.35259	1.15628	2.9536	3.10659	2.54816	1.68348
IGDB04821	IGDB04821.2	0	0	0	0	0	0	1.10114	0	0	0	0.76694
IGDB04821	IGDB04821.3	0.684493	0.585084	0	0.426417	0.174047	0.62534	0.749485	0.665834	0.650872	0.565756	0.164664
IGDB04821	IGDB04821.4	6.04605	6.47344	0.362849	1.99936	2.42849	1.94384	2.83412	4.53438	4.54396	4.22499	1.83574
IGDB04824	IGDB04824.1	0.010759	0.0154715	0	0	0.055279	0.265446	0.367225	1.04281	0.840576	1.0335	0.810729
IGDB04824	IGDB04824.2	0	0	0	0	0.0187965	0.318742	0.579041	0.799624	1.47946	1.31477	1.84852
IGDB04852	IGDB04852.1	14.4604	2.89712	0.790672	0.175396	0.474514	0.39673	0.190109	1.05993	0.49004	0.047607	0.202896
IGDB04852	IGDB04852.2	66.5607	43.599	0	0	0.926322	0.912631	0.9155	0	1.16284	1.33725	1.63936
IGDB04867	IGDB04867.1	10.8413	5.18965	0.787802	0.069257	2.1184	2.86388	3.84491	6.65294	4.4019	2.52489	6.76929
IGDB04867	IGDB04867.2	0	0	0	0.384412	0	0.23506	0.454569	1.59904	3.40198	4.06742	1.66945
IGDB04867	IGDB04867.3	19.1424	8.8557	2.18975	0	3.47172	3.53058	5.16634	3.94757	5.33908	3.30175	4.40768
IGDB04895	IGDB04895.1	0	23.5417	14.5857	3.90073	1.4579	0.667576	2.76019	2.20135	4.02789	4.41705	6.39205
IGDB04895	IGDB04895.2	0	0	0	0	0	0.280808	0.607652	1.15491	2.98297	0.652511	0.352926
IGDB04895	IGDB04895.3	0	0	0	0	0	0	0.553145	0.456657	1.95732	0.559303	0.318264
IGDB04895	IGDB04895.4	0	0	0	0	0	0	0	0	0	0.0175415	0
IGDB04895	IGDB04895.5	2.68996	0.0718475	0.101691	2.98744	0	0.277128	0.725915	0.760979	1.97998	0.479069	0.292107
IGDB04895	IGDB04895.6	0	0	0	0	5.53002	7.4096	11.3179	17.8592	5.88856	7.47664	1.79835
IGDB04895	IGDB04895.7	0	0	0	0	0.0796115	0.407882	0.679184	0.857197	2.24	0.461794	0.31148
IGDB04895	IGDB04895.8	0.957327	0.114241	0	0.0159205	0.032043	0.282236	0.327684	0	2.00003	0.529173	0.29087
IGDB04898	IGDB04898.1	0.663397	0.576427	0.751051	1.18407	0.290181	1.5597	1.11737	2.72341	2.63139	2.84384	1.86134
IGDB04898	IGDB04898.2	0	0.0179545	0.351382	1.67489	1.88988	1.59469	3.25834	3.48405	4.63459	4.34315	3.57216
IGDB04899	IGDB04899.1	0.063049	0.154157	1.08505	0.164914	0.363169	0.746969	2.05337	0.0024345	0	0.000972	0.002275
IGDB04899	IGDB04899.2	0	0	0.583635	0	0	0.602721	0	2.97675	2.76738	3.78066	4.53453
IGDB04899	IGDB04899.3	0	0	0.328323	0	0	0.032532	0.309802	0.0659965	0.0781165	0.0047345	0.027315
IGDB04909	IGDB04909.1	0	0	0	0	0	0.0182575	0.635975	0	0	0	0
IGDB04909	IGDB04909.2	0	0	0	0	0	0	0	0	0	0	0
IGDB04909	IGDB04909.3	0	0	0	0	0.023542	0.210296	0.054195	1.02876	0.486526	0.354673	0.089438
IGDB04909	IGDB04909.4	0	0	0	0	0	0	0	0	0	0	0
IGDB04909	IGDB04909.5	0	0.103396	0.033977	0.254456	0.39203	1.158	0.0032315	1.1532	0.902285	1.31755	2.51007
IGDB04950	IGDB04950.1	0	0.0446235	0	0.0015285	0	0.0191155	0.831407	4.58158	2.0778	1.43098	0.41671
IGDB04950	IGDB04950.2	0.17902	0.119385	4.38504	1.5568	1.39588	1.29992	2.91564	2.45504	3.63231	4.1457	1.58004
IGDB04950	IGDB04950.3	0	0.022676	0.027249	0.11789	0.09977	0.436771	0.123144	0.0220585	0.0127495	0.200291	0.39784
IGDB04992	IGDB04992.1	0	0	0	0	0	0	0.0224265	0.346788	0.899669	1.15541	0.369063
IGDB04992	IGDB04992.2	0	0	0	0	0	0	0	0	0	0	0
IGDB04992	IGDB04992.3	0	0	0	0	0	0.821571	0.508611	2.99002	2.64363	2.4645	0.702291
IGDB04992	IGDB04992.4	1.16079	0.063568	0.0342805	0.0189555	0.150888	0.025155	0.530255	0.688275	0.741919	0.797238	0.24867
IGDB04992	IGDB04992.5	0.451526	1.2861	0	0	0.183725	1.13554	1.694	2.78713	2.7605	2.15152	0.549702
IGDB05012	IGDB05012.1	0.232876	0.145779	0.0387105	0.184389	0.231292	0.085127	0.621749	1.34023	3.17948	1.44142	1.61143
IGDB05012	IGDB05012.2	0	1.50101	0	0.123112	0.797333	1.60188	1.48211	1.20016	2.29451	2.37735	2.32
IGDB05108	IGDB05108.1	0	0.322995	3.57484	0	0	0	0.003219	0	0	0	0.261323
IGDB05108	IGDB05108.2	2.74178	4.28224	1.16949	4.61489	9.94164	7.69334	10.1213	8.8964	4.85357	4.09347	3.47787
IGDB05108	IGDB05108.3	0	0	0	0	0	0	0.0024335	0	0	0	0
IGDB05108	IGDB05108.4	0	0.028573	0.012293	0	0	0	0.009573	0	0	0	0
IGDB05123	IGDB05123.1	0.46018	0.439536	0.621793	0.227911	0.0635375	0.136177	0.10356	0	0.0517225	0	0
IGDB05123	IGDB05123.2	0	1.32734	0	1.22997	0	0	0.597953	0.378621	0	0.0938855	0
IGDB05123	IGDB05123.3	1.82557	1.20017	3.77135	0.0013385	1.03986	0.91367	0	0.0516845	0.319729	0.249399	0.233157
IGDB05123	IGDB05123.4	0.14607	0.0354475	0	0	0	0	0	0.030405	0	0.029662	0.0650585
IGDB05143	IGDB05143.1	0	0	2.84176	0.954485	0.244013	0.327439	0.206603	0.478343	1.25481	0.508544	0.716139
IGDB05143	IGDB05143.2	0	0.283545	0.05095	0	0.611338	0	0.196739	0.01449	0.018399	3.34935	1.95224
IGDB05143	IGDB05143.3	0	0	0	0	0	0	0	0	0	0	0
IGDB05199	IGDB05199.1	0.0232645	0.141384	0.072543	0.377343	0.470224	3.22813	5.5135	6.08168	4.15029	5.0918	2.13692
IGDB05199	IGDB05199.2	0	0	0	0.471954	1.77885	4.36387	7.8285	8.46388	8.54474	7.08544	4.78758
IGDB05210	IGDB05210.1	0.122296	0.13587	1.12493	1.62577	0.436175	0.963487	0.369136	1.02811	0.616963	0.487689	1.36879
IGDB05210	IGDB05210.2	0.168716	0.140343	0.501208	0.699541	2.14591	0.696266	1.33807	0.651146	2.52686	2.51895	6.4441
IGDB05243	IGDB05243.1	0.764393	1.96905	2.18941	0.067826	0.01966	1.47114	3.1978	5.43128	3.91914	1.61542	4.90714
IGDB05243	IGDB05243.2	0.411118	0.574075	0.339557	0.332531	0.68698	11.6183	23.396	33.0292	12.5342	7.11473	3.55222
IGDB05243	IGDB05243.3	5.34002	6.27594	0.286912	3.02398	17.5798	49.9881	84.8614	89.3539	58.7012	32.1242	12.4067
IGDB05243	IGDB05243.4	0.557835	1.86543	0.345042	0	4.50801	20.0115	27.6167	17.0728	15.0524	9.66248	5.96445
IGDB05243	IGDB05243.5	0	0	0	0.739847	5.92449	9.7544	9.91673	5.11286	7.7817	2.1151	1.86151
IGDB05259	IGDB05259.1	0.541937	0.260321	9.14107	5.06201	2.91887	5.07171	14.2784	14.3591	24.8519	24.943	8.30563
IGDB05259	IGDB05259.2	0.231776	0.842287	7.11472	2.90301	5.69219	12.8384	18.4483	28.4845	22.0069	36.0329	15.4204
IGDB05287	IGDB05287.1	1.29745	0.782736	0.298147	0.373103	0.518633	0.347892	0.448875	0.489676	0.43042	0.244048	0.201222
IGDB05287	IGDB05287.2	0	0	0.023159	0	0	0	0	0	0	0	0
IGDB05287	IGDB05287.3	3.93306	4.51804	0.259827	0.638368	1.17434	1.36322	1.04987	0.401352	0.003193	0.240192	0.727686
IGDB05290	IGDB05290.1	0	0.0641885	0.045233	0	0.294744	0.0963965	0.123189	2.41408	1.6074	1.29845	2.06831
IGDB05290	IGDB05290.2	0	0	0	1.83665	0.719919	0.506128	1.00187	0.830503	4.00074	3.24264	0.166097
IGDB05290	IGDB05290.3	0	0	0.271429	0.153567	0.0647765	1.21764	1.54363	8.23292	13.3793	12.2843	2.89177
IGDB05306	IGDB05306.1	0.594004	0.150397	0.895412	4.70345	3.19087	5.75498	5.71371	4.15378	2.76174	1.80632	1.69222
IGDB05306	IGDB05306.2	1.00288	1.24445	2.80978	2.24927	8.26238	34.5578	24.213	15.1482	7.21521	6.73851	2.60355
IGDB05313	IGDB05313.1	0	0.0567095	0	0.001626	0.123078	0.0257925	0.0668365	0	0.119585	0	0.0173825
IGDB05313	IGDB05313.2	1.44866	0.279475	0	0	0.164687	0.336577	0.144755	0.132506	0.536709	0.147103	0.0785935
IGDB05313	IGDB05313.3	1.40318	1.5341	0.448504	0	0.046433	0	0	0	0	1.27242	0.59771
IGDB05313	IGDB05313.4	0	0	0.104775	0.302735	0.316897	0	0	0.826255	0	0.0027465	0.003196
IGDB05313	IGDB05313.5	0.0104395	0.000346	0	0	0.0136205	0.154233	0.477632	0.604652	0.129942	0	0.498275
IGDB05313	IGDB05313.6	3.66729	1.89691	0	0.0036165	0.806006	0.324437	0.473633	1.15978	0.636529	0.243832	0.736098
IGDB05313	IGDB05313.7	0	0	0	0	0	0	0	0.233552	0.676801	0	2.28098
IGDB05313	IGDB05313.8	0	0	0	0.461814	4.08773	16.147	22.7465	24.5218	16.3046	15.5643	4.09619
IGDB05317	IGDB05317.1	25.6048	27.4878	0.1751	0	0.611737	0.837013	1.08714	0.897703	0.535982	0.545215	0.887715
IGDB05317	IGDB05317.2	2.83087	2.64002	0.540354	0.427974	0.802218	1.77445	2.86189	6.108	3.87181	3.57024	0.868915
IGDB05317	IGDB05317.3	0	0	0	0	0	0	0	0	0	0	0
IGDB05409	IGDB05409.1	0.568621	1.04256	0.346754	0.211798	0.213195	0.137715	0.210968	0.308051	0.239581	0.148781	0.735008
IGDB05409	IGDB05409.2	0.050668	0.699695	0.160195	0.033103	0.0293655	0.0116895	0	0.04657	0.074856	0.132382	0.166168
IGDB05409	IGDB05409.3	0	0	0	0.193361	0.078028	0	0	0	0	0	0
IGDB05409	IGDB05409.4	0	0.024021	0.0074975	0	0	0	0	0	0.0563315	0	0
IGDB05409	IGDB05409.5	0.011626	0.286048	0.217588	0.028942	0.0595345	0.01041	0.0359595	0.004278	0.0907915	0.067913	0.0784415
IGDB05409	IGDB05409.6	0	0.202967	3.58554	0.117595	0.233074	0.048353	0.272159	0.239758	0.169404	0.129357	0.160051
IGDB05425	IGDB05425.1	0.0101715	0.0055	0.009782	0.29688	0.141556	0.131712	0.068515	0.248427	0.431231	0.270118	0.147249
IGDB05425	IGDB05425.2	7.05608	6.46398	0.363761	0.845297	0.729046	0.628066	0.420175	0.418679	1.12163	1.48193	1.18114
IGDB05425	IGDB05425.3	2.44967	1.79304	0	0.647509	0.111834	0.565609	0.636462	0.696246	0.563421	0.119189	0.978141
IGDB05460	IGDB05460.1	73.9598	84.1843	90.436	35.0485	27.4199	17.7075	20.2581	20.947	15.9867	15.2815	18.4649
IGDB05460	IGDB05460.2	0	0.020058	1.82053	0.008962	13.0164	20.1658	25.5508	33.0569	25.6211	36.8667	35.1279
IGDB05461	IGDB05461.1	0	0	0	0	0	0	0	0	0	0	0
IGDB05461	IGDB05461.2	0.200291	0.292847	2.03933	3.12342	1.85966	2.85433	2.40876	2.18453	3.75214	4.78353	5.49064
IGDB05461	IGDB05461.3	0	0	0	0.828145	2.94162	0	0.933944	1.60288	0	0	0
IGDB05461	IGDB05461.4	0	0	0.0047275	5.95e-05	0.008297	0	0.009541	0	0.0056405	0.0321675	0.0034925
IGDB05485	IGDB05485.1	0.596307	0.404353	0.0583345	0.505333	0.369382	0.954752	1.65959	1.12492	3.82709	0.974235	0.54316
IGDB05485	IGDB05485.2	0.893485	0.812244	0	0.239073	0	0.222022	0.756242	0.808046	0.70556	0	0
IGDB05485	IGDB05485.3	0	0	0	0	0	0.0028665	0.013183	0.0778545	0.293812	0.416816	0.540856
IGDB05485	IGDB05485.4	0	0	0	0.0013895	0.0007225	0.160347	0.214809	5.27892	0.688987	1.45492	0.509798
IGDB05486	IGDB05486.1	0.104689	0.650454	0.392885	0.233068	0.303963	2.74805	2.91779	2.29101	1.61995	1.68462	0.002725
IGDB05486	IGDB05486.2	0	0	0	0.799879	3.98016	2.05676	1.73184	1.2105	1.69555	1.92317	3.28286
IGDB05486	IGDB05486.3	0	0	0	0.070256	0.434107	0.201611	0.441632	0.002769	0.069987	0.103693	0.005088
IGDB05488	IGDB05488.1	0.0478625	0.034662	0.780954	1.30698	1.17629	1.85991	2.18147	2.166	1.4834	1.07551	0.56897
IGDB05488	IGDB05488.2	0	0	0.367279	0.204845	0.103516	0	0.329873	0.49867	0.116773	0.0844305	0.046667
IGDB05488	IGDB05488.3	2.30203	1.30008	1.17917	2.60576	1.69012	0.88815	1.32865	0.804495	0.559878	1.86311	1.76771
IGDB05507	IGDB05507.1	12.1602	10.6416	4.87049	4.96313	5.88495	2.69123	7.21472	2.63402	5.56295	1.76644	5.92363
IGDB05507	IGDB05507.2	2.07713	1.2945	5.50687	8.71742	1.07691	3.79289	0.806188	5.54726	0.65855	5.02748	0.869769
IGDB05509	IGDB05509.1	0.472571	0.653848	1.31429	0.534932	0.499377	0.0623105	0.872187	2.8492	5.35243	2.76688	2.21549
IGDB05509	IGDB05509.2	0	0	0.211876	0.0466475	0.264555	1.15242	1.06001	0.850684	1.25394	0.889761	0.825808
IGDB05509	IGDB05509.3	0	0.235225	2.08217	0.0555425	1.29071	1.37489	0.942044	0.772546	1.5468	1.00554	0.681857
IGDB05509	IGDB05509.4	0	0.006364	0.219046	0.028512	0.053369	0.104881	0.215264	0.119339	0.691505	0.294359	0.072149
IGDB05511	IGDB05511.1	0.02056	0.0410235	0.033537	0.759876	2.03393	2.87678	2.2468	2.42343	1.06987	1.27055	1.27785
IGDB05511	IGDB05511.2	21.869	15.8448	1.49597	3.55783	6.69852	9.22812	7.72647	7.46562	3.20572	4.66395	3.47284
IGDB05511	IGDB05511.3	11.4833	21.8051	4.93898	11.5447	8.50939	8.91942	11.8848	8.20192	7.55952	5.71844	4.52551
IGDB05511	IGDB05511.4	0	0	0.003725	0.0068105	0.242032	0.035486	0.188084	0.0350215	0.0244145	0.256456	0.020648
IGDB05606	IGDB05606.1	1.89284	1.01264	0.673094	0	3.15105	5.05397	7.98052	9.64798	10.2337	5.85474	3.78972
IGDB05606	IGDB05606.2	1.21161	0.465965	1.9408	3.18324	2.7109	3.59596	4.60976	2.87477	3.05605	3.37118	2.28506
IGDB05606	IGDB05606.3	1.13673	0	0	0	0	0	0	1.13795	0	0	0
IGDB05606	IGDB05606.4	0.185768	0.067267	0.412472	0.525671	0.767985	1.49714	1.9076	2.38012	2.1683	1.74322	0.499447
IGDB05613	IGDB05613.1	0.006534	0	0.019795	0.180482	0.289056	1.54986	0.0077125	0.146719	0.749967	0.316545	0.490847
IGDB05613	IGDB05613.2	0	0	0	0	0	1.17251	4.92685	6.57674	4.29689	3.86353	4.50266
IGDB05626	IGDB05626.1	0.726472	0.449339	0.0248065	0.070111	0.256562	0.876309	2.20696	2.92574	3.28501	3.5692	1.17395
IGDB05626	IGDB05626.2	0	0	0	0	0.761765	1.6989	2.02025	4.3708	6.51087	4.43648	0.750306
IGDB05626	IGDB05626.3	0	0	0	0	0	0	0	0	0	0.001728	0
IGDB05629	IGDB05629.1	0	4.24525	4.53021	54.5033	37.6511	29.9624	30.8086	37.8802	80.8967	81.4601	42.8806
IGDB05629	IGDB05629.2	0.436572	0.656301	0.485177	0.915974	1.55497	0.519359	0.166637	0.443431	0.175074	0.488835	0.336456
IGDB05636	IGDB05636.1	48.2403	24.5823	5.27604	1.01489	0.28804	0	0	0	0	0	0
IGDB05636	IGDB05636.2	2.20107	2.87429	2.0182	6.04688	1.1923	1.8266	7.3867	1.63193	5.99538	6.13583	4.17006
IGDB05636	IGDB05636.3	5.88001	12.1349	0.977251	9.2196	21.3022	23.5063	13.2756	17.2033	7.15501	2.59009	5.57091
IGDB05636	IGDB05636.4	0.0794805	0.0671595	0.000869	0	0.0123515	0.0210685	0.0084495	0.027932	0	0.007507	0.0140565
IGDB05662	IGDB05662.1	0	0	0	0	5.11014	66.0703	86.5994	203.098	198.004	139.555	85.7914
IGDB05662	IGDB05662.2	0	0	0	0	72.8032	623.889	789.26	1454.76	891.512	892.049	142.3
IGDB05662	IGDB05662.3	0	0	0.137356	0	0	0	0.780084	22.8429	67.43	81.0279	34.4884
IGDB05663	IGDB05663.1	0	0	0.031936	0	0	0	25.2596	25.2598	1.21182	0	0.0107265
IGDB05663	IGDB05663.2	0	0	0	0	15.0209	332.643	535.364	1661.82	1483.13	1795.07	1057.56
IGDB05663	IGDB05663.3	0	0	0	0	0	0	0	0	0	0	0
IGDB05663	IGDB05663.4	0	0	0	0	0	0	0	0	0	0	0
IGDB05663	IGDB05663.5	0	0	0	0	0	0	0	0	0	0	0
IGDB05663	IGDB05663.6	0	0	0	0	0	0	0	0	0	0	0
IGDB05663	IGDB05663.7	0	0	0	0	0	0	0	0	0	0	0
IGDB05663	IGDB05663.8	0	0	0	0	0	0	0	0	0	0	0
IGDB05690	IGDB05690.1	0.374607	0.149528	0.037292	0.082617	0.696148	1.47988	0.895381	1.56597	1.38358	0.637235	1.18472
IGDB05690	IGDB05690.2	0	0	0	0.076798	0.238601	1.51558	2.495	1.27551	1.03661	0.702776	0.886714
IGDB05690	IGDB05690.3	0	0	0	0	0	0	0	0	0	0	0
IGDB05698	IGDB05698.1	0.070446	0.365428	4.99637	3.12472	4.03559	3.51423	4.65027	4.2608	2.72482	3.16504	1.21598
IGDB05698	IGDB05698.2	0	0.492298	14.3634	10.5491	9.11294	9.7816	9.03476	7.54886	4.87767	3.15318	1.4232
IGDB05722	IGDB05722.1	0.051033	0	0	0.063581	2.39961	1.55653	4.45026	7.25272	1.70244	2.11596	0.896639
IGDB05722	IGDB05722.2	0	0	0	0.686917	1.52389	6.51976	6.5013	10.6941	7.82263	5.21954	1.99493
IGDB05722	IGDB05722.3	0.02915	0.13624	3.18517	3.07222	0.67466	2.17001	0	0.46322	3.15658	4.39367	2.92837
IGDB05726	IGDB05726.1	0.038259	0.704588	0.757684	0.460111	3.67564	1.59701	2.49501	3.60507	3.73822	4.75039	2.26722
IGDB05726	IGDB05726.2	0.0314165	1.3745	0.195133	0.330541	2.96441	5.86347	9.22681	12.8486	15.0012	15.8174	9.30119
IGDB05738	IGDB05738.1	0.0064645	0.164963	0	0.033553	0	0.171032	0.991484	4.34487	9.20812	4.66042	1.59339
IGDB05738	IGDB05738.2	0	0.158252	0.34567	0.013401	0.039041	0.056567	0.0832275	1.13675	2.06199	0.865517	0.533328
IGDB05865	IGDB05865.1	0	0	0.386348	0.282836	1.70863	5.08976	7.50065	8.65421	6.96003	6.95125	7.95534
IGDB05865	IGDB05865.2	0.0168725	0.042496	0	0.300419	0.225187	1.23111	1.22426	0.895677	0.899505	0.781046	0.655802
IGDB05865	IGDB05865.3	0	0	0	0	0.06472	0.0671155	0.11169	0.0985155	0.0967125	0.083548	0.19049
IGDB05871	IGDB05871.1	0	0.747564	0.460031	0.546405	2.49061	4.72582	8.32653	6.53182	4.23202	2.33529	1.24006
IGDB05871	IGDB05871.2	0	0	0	0.910192	0.379666	3.06852	5.05984	5.17872	2.10648	0.648311	0
IGDB05900	IGDB05900.1	2.57771	2.46947	3.11372	1.88466	2.08335	1.67117	3.08056	0.859197	4.6178	1.92481	0.466477
IGDB05900	IGDB05900.2	3.93265	5.30818	0.384194	0.607603	0	0.155665	0	10.3159	0	0	0
IGDB05900	IGDB05900.3	6.45958	8.69988	1.9953	0.611506	0.289943	0.719675	0.595975	1.60098	0.68575	1.3401	0.14446
IGDB05942	IGDB05942.1	0.0356075	0.114994	1.19003	0.0455335	0.142762	0	0.16851	0.420729	0.099575	0.993417	0.574203
IGDB05942	IGDB05942.2	0.655317	0.624197	5.15325	8.57467	12.4177	3.31248	9.0433	14.5429	13.0112	9.35576	8.44852
IGDB05942	IGDB05942.3	0.447902	0	0	2.06367	1.465	1.9803	0.597503	0.415018	0	0	0
IGDB05942	IGDB05942.4	0	0	0.43625	0.0295035	0.097612	0	0.095605	0.202645	0.134375	0.369569	0.220933
IGDB05942	IGDB05942.5	1.9467	25.9799	13.3745	9.05608	7.71506	11.1586	6.38755	3.22939	3.88726	3.71227	4.29549
IGDB05942	IGDB05942.6	0	14.1737	17.7561	0.005384	2.61659	0.0028595	0.00227	0.005427	0.491721	0.2482	2.05879
IGDB05943	IGDB05943.1	24.4758	13.9496	2.35457	6.90585	0.990995	4.25224	9.36753	8.26659	3.38066	7.94641	7.12278
IGDB05943	IGDB05943.2	35.0225	17.5901	6.51347	0.61083	8.19561	5.36087	2.16403	2.40675	6.6822	2.94213	2.6142
IGDB05943	IGDB05943.3	0.0025875	0.002579	0.022194	0.0026675	0.0003695	0.012782	0.0114435	0.26032	0.050626	0.0005625	0.0079325
IGDB05949	IGDB05949.1	0.00687	0.0368925	0.897602	7.71554	1.89233	0.945168	1.33607	1.80183	1.0279	0.61504	0.0757675
IGDB05949	IGDB05949.2	0	0	4.02734	41.4598	9.62347	4.23748	6.09799	6.77443	3.27994	1.85645	0.1627
IGDB05965	IGDB05965.1	4.48261	0.745541	0.0871185	0.779296	0.33814	1.17093	1.57877	0.769203	0.197281	0.775409	1.92303
IGDB05965	IGDB05965.2	0	1.49392	10.5276	16.1813	10.0719	8.77417	6.94401	4.54007	3.02987	2.22891	2.05246
IGDB05967	IGDB05967.1	0.041693	0.0967785	0.200591	0.537434	0.440273	0.460396	1.13501	1.55854	2.53563	1.63638	1.00675
IGDB05967	IGDB05967.2	0	0.0133955	0.132062	0	0.296289	0.767783	0.664496	0.219202	1.22256	0.521043	0.786127
IGDB05972	IGDB05972.1	0	0.061759	0.118628	2.95327	10.2634	11.8496	11.1412	10.8404	6.78228	5.68421	2.8729
IGDB05972	IGDB05972.2	0.006215	0.0303685	0.0078135	1.66959	2.28121	2.77549	3.66447	3.06847	1.77164	1.3596	1.07909
IGDB05989	IGDB05989.1	0.0100875	0	0	0	0.283387	0.951059	1.18924	1.08576	0.525797	0.881618	0
IGDB05989	IGDB05989.2	0.008361	0.046059	0.300739	0.30863	0.176037	0	0.660038	2.67502	7.9882	4.81466	2.25732
IGDB06006	IGDB06006.1	0	0.29116	2.84554	2.63471	0.598772	0.019197	1.12612	0.0802785	0.399114	0.396495	0.105095
IGDB06006	IGDB06006.2	0.0393515	0.13157	2.60036	3.17297	1.60481	1.04334	0.291154	0.395089	0.113506	0.180036	0.027726
IGDB06021	IGDB06021.1	0.0060995	0.451466	15.799	24.9353	14.6592	3.62186	6.31174	16.2261	86.1049	240.534	58.8768
IGDB06021	IGDB06021.2	0.0200185	0.38607	17.2343	14.0879	28.6722	15.4717	18.1648	21.021	82.4288	132.082	28.0167
IGDB06025	IGDB06025.1	4.71489	4.09014	0.124981	0.0860465	0.389181	0.132998	0.493423	0.282945	0.396635	0.375429	0.644167
IGDB06025	IGDB06025.2	21.7197	13.8026	0.726758	0.38019	0.132567	0.262661	0.391759	0.571049	0.636034	0.945479	1.4249
IGDB06038	IGDB06038.1	0.0056445	0.026689	0	0	0.059699	0.21147	0.260898	0.834344	1.25293	1.31224	0.583929
IGDB06038	IGDB06038.2	0.005839	0.180225	0	0	0.0003245	0.306117	0.184795	0.454626	0.440308	1.03992	0.206145
IGDB06038	IGDB06038.3	0	0	0	0	0	0.036252	0.040284	0.0138295	0.206877	0.317615	0
IGDB06099	IGDB06099.1	55.7716	65.1036	62.1539	22.6569	45.9808	31.1847	10.0662	19.2992	4.25429	8.35416	8.42473
IGDB06099	IGDB06099.2	156.665	168.056	90.0151	63.6078	31.8653	14.6055	31.069	0.0709495	17.1353	22.4514	26.8074
IGDB06099	IGDB06099.3	3.23086	3.58824	1.84486	1.69145	1.57442	0.792596	0.543443	0.393287	0.195362	0.23494	0.395093
IGDB06141	IGDB06141.1	0.012714	0.088802	0.041384	0.240275	0.869407	2.02652	3.52686	2.78349	2.27952	1.71001	0.791485
IGDB06141	IGDB06141.2	0	0	0	1.07527	3.54642	5.91793	7.07737	11.6728	11.8076	9.86317	2.80049
IGDB06148	IGDB06148.1	0	15.9425	16.7281	13.3543	9.91057	22.4413	36.0327	68.1106	85.2359	51.8558	31.9031
IGDB06148	IGDB06148.2	18.775	2.70542	0.431592	0.0403815	0.0529115	0.265034	0.382184	0.031799	0.69686	0.0580035	0.0241775
IGDB06153	IGDB06153.1	0	0	0	0.001506	0.0050375	0.020594	0.0188865	0.0045655	0.0113625	1.32151	0.00157
IGDB06153	IGDB06153.2	0.289747	0.677148	0.169985	2.35258	9.06926	18.6074	13.441	13.0101	14.262	6.67891	2.04214
IGDB06153	IGDB06153.3	0	0	0.609145	6.06142	10.3656	10.2499	6.70383	5.18632	4.11254	1.48988	1.23289
IGDB06163	IGDB06163.1	0.0826135	0.169855	0	0.263877	0.843262	0.497377	2.23815	2.94207	5.37827	5.55533	1.52935
IGDB06163	IGDB06163.2	0	0	0	0	0.0686355	0.275523	0.163713	0.747478	1.0113	0.714993	0.910322
IGDB06163	IGDB06163.3	0	0	0	0	0	0	0	0	0	0	0
IGDB06163	IGDB06163.4	0	0	0	0.011027	0	0.0498065	0.0030835	0.020908	0.126158	0.128489	0.0289095
IGDB06163	IGDB06163.5	0.006527	0.266832	0.262788	0	0.166393	0.637285	0.302706	1.34125	0.924793	1.63183	6.51495
IGDB06207	IGDB06207.1	0	0	0.397311	0.285169	0.672485	0.740788	1.04748	1.22817	0.839356	0.513672	0.157754
IGDB06207	IGDB06207.2	0.265244	0.619034	3.04265	0.102817	0.156154	2.62558	5.89188	9.78259	5.3253	3.95064	4.25986
IGDB06207	IGDB06207.3	0	0.166958	2.59915	9.71689	10.3752	9.95531	10.2597	9.70332	5.59438	6.40792	1.69593
IGDB06207	IGDB06207.4	0	0	0.005657	0	0.432231	0.008623	0.010677	0.0148705	0.0151945	0.333031	0.0252925
IGDB06246	IGDB06246.1	0	0	0	0	0.396514	1.79348	1.49315	5.61433	22.7501	28.6369	21.8448
IGDB06246	IGDB06246.2	0.0822785	0.088602	0.181393	0.141175	0.378634	0.0829075	1.0801	0.171132	0.183282	0.160563	0.103926
IGDB06249	IGDB06249.1	0	0	0	0.0112525	0	0	0	0	0.0159405	0.0133205	1.71368
IGDB06249	IGDB06249.2	0	0	0	0	0	0.016138	0	0	0.0105175	0.104728	0
IGDB06249	IGDB06249.3	0	0	0	0	0	0	0	0	0.0904435	0.099091	1.45903
IGDB06290	IGDB06290.1	4.60484	5.37965	1.3299	2.5892	3.85396	3.68947	1.36604	2.77799	1.56908	1.34522	1.21139
IGDB06290	IGDB06290.2	10.4616	4.92838	8.65129	8.13709	8.23571	7.84177	7.16815	2.55501	0.652145	0.662356	1.3531
IGDB06323	IGDB06323.1	0	0	0.68104	0.290474	1.90785	5.63293	16.5757	22.3828	12.3826	9.81688	3.4576
IGDB06323	IGDB06323.2	0.067661	0.0260265	0	0.273302	0.017513	3.90692	1.52549	1.67365	9.74831	3.97161	0.071753
IGDB06327	IGDB06327.1	0	0	0	0	0	0	0	0	0	0	0
IGDB06327	IGDB06327.2	4.30606	1.87045	0.535763	1.81681	2.97942	3.3094	2.78493	1.97727	1.65379	1.67355	1.83631
IGDB06327	IGDB06327.3	0.795377	0.559612	0.004565	0.3928	3.09214	3.68075	1.81025	2.84324	4.53506	5.84451	19.1322
IGDB06329	IGDB06329.1	2.89547	1.34254	0.236056	0.335133	0.290806	1.06492	0.599683	0.483561	1.77452	1.07724	1.85171
IGDB06329	IGDB06329.2	3.1592	0.952138	0.180776	0.793964	0.190009	1.25443	1.33597	0.699053	1.22692	0.978207	1.44887
IGDB06340	IGDB06340.1	0.2659	0.199367	0.595575	0.383607	0.40895	0.350002	0.922292	3.95301	1.67171	1.01073	1.53988
IGDB06340	IGDB06340.2	0	0	0.516949	0	0.008682	0.449024	0	2.27416	0.923364	1.38956	0.189086
IGDB06340	IGDB06340.3	0	0	0	0.012204	0.390611	1.94989	5.60948	6.65954	4.29249	3.53492	0.805366
IGDB06340	IGDB06340.4	0	0	0	0.65447	0.713046	6.26213	10.3593	11.0994	8.02623	4.9627	0.810113
IGDB06340	IGDB06340.5	0	0	0	0	0	0.0038985	0.0051985	0.0084475	0	0.002544	0.002415
IGDB06344	IGDB06344.1	23.5798	5.73613	2.75926	4.60589	5.83785	9.07834	10.9155	7.01217	5.93086	8.07918	2.63171
IGDB06344	IGDB06344.2	37.4379	18.7089	0	6.2036	14.4119	8.30757	8.23099	9.30891	4.16029	0	3.50611
IGDB06362	IGDB06362.1	6.57396	4.22814	0.15327	0.591272	1.21355	1.33021	0.342135	1.12197	3.34681	2.90207	3.59208
IGDB06362	IGDB06362.2	0.0024665	0.88777	16.9632	6.61618	2.84456	1.46661	3.39082	4.63728	4.37846	7.98303	11.4451
IGDB06377	IGDB06377.1	0	0	0	0	0.0185825	4.81316	7.27759	3.38195	2.31855	1.25496	0.327364
IGDB06377	IGDB06377.2	0.019644	0	0	0	0.016981	0.414463	11.5853	1.04195	2.55291	1.38695	0.94167
IGDB06377	IGDB06377.3	0.18396	0.156018	0.029199	0.033137	0.232197	6.72336	0	1.68517	1.05181	2.67977	2.37345
IGDB06387	IGDB06387.1	0.0327465	0.0349505	0.191522	0.245243	0.356264	0.273427	0.050467	0.015591	0	0	1.10934
IGDB06387	IGDB06387.2	0	0	0	0	0	0.591924	1.67253	4.03801	4.87923	5.95764	1.23721
IGDB06403	IGDB06403.1	0	0	0.48508	0	0.040521	1.26236	3.59645	10.4831	10.6586	8.47859	2.52052
IGDB06403	IGDB06403.2	0	1.40083	0	0.199423	0.146111	0.343212	0.022396	0	0.0708875	0.129941	0
IGDB06411	IGDB06411.1	0.0445815	2.11068	0.316507	6.51085	17.3996	8.3168	10.0758	8.51069	8.51026	6.87545	6.94029
IGDB06411	IGDB06411.2	0.0877435	2.01088	0.337317	4.35172	10.8682	6.30006	9.46788	8.37454	9.43589	8.73879	5.82114
IGDB06487	IGDB06487.1	0.326495	0.471936	2.47699	6.61958	7.17747	4.3895	11.0504	9.03277	4.32078	8.36795	8.86123
IGDB06487	IGDB06487.2	0.537942	0.411149	0.681448	3.55278	7.37392	4.62863	1.61004	2.85657	5.71931	4.75623	1.77082
IGDB06505	IGDB06505.1	0	3.55761	0.814332	0.345208	0.337543	0	0.266556	0	0.086978	0	0
IGDB06505	IGDB06505.2	0.132034	56.6781	10.1672	9.9415	3.76815	0.564013	0.298756	0.212817	0	0.116458	0.145642
IGDB06538	IGDB06538.1	0	0.129516	0.0568275	2.27901	1.91206	0.35165	1.53982	3.73003	4.91583	4.68414	1.36528
IGDB06538	IGDB06538.2	0.48239	0.49239	0.958841	5.44598	1.37497	0.864118	0.484698	1.40354	1.20022	1.21893	0.360879
IGDB06552	IGDB06552.1	0	0	0.010815	0.075284	0.271412	0	0.395397	0.331483	1.42572	0	1.23045
IGDB06552	IGDB06552.2	0	0.0139145	0.006551	0.023125	0.0100355	1.15832	1.00729	0.789157	0.681742	2.47686	0.019053
IGDB06552	IGDB06552.3	0	0	0.0035945	0.0049955	0.0072565	0.0158585	0.002723	0	0.005695	0.0051	0
IGDB06744	IGDB06744.1	0	0	0	0	0.102235	0.0225695	0.03842	0.16007	1.012	0.93296	0.0115195
IGDB06744	IGDB06744.2	0.00624	0.0060675	0.0051075	0	0.0225755	0.115954	0.103099	0.5453	2.17688	3.39581	6.57835
IGDB06785	IGDB06785.1	0	0.341502	0.097624	0.850947	1.46936	2.75491	3.29025	4.83405	7.57343	5.17357	4.61327
IGDB06785	IGDB06785.2	0.127323	0.176187	0.025798	0	0	0.005712	0.014952	0.067295	0.0110275	0.048155	1.44921
IGDB06789	IGDB06789.1	0.55611	0.77938	0.915636	1.91639	1.19405	4.01252	5.7527	1.40845	1.09569	4.10622	1.8217
IGDB06789	IGDB06789.2	0	0.0169285	0.116508	0.333311	8.07885	4.76423	6.89258	13.7175	13.3867	17.4535	6.35841
IGDB06789	IGDB06789.3	0	0	0	0	0.025118	0.100039	0.0526125	0.088701	0.0925195	0.160002	0
IGDB06789	IGDB06789.4	0	0	0	0	0.13123	0.088232	0.247693	1.26184	1.04161	0.264028	1.40281
IGDB06807	IGDB06807.1	0.141794	0.087723	0.470784	0.070954	0.068298	0	0	0	0.081923	0.122762	0
IGDB06807	IGDB06807.2	0.966094	2.30466	0.004528	0.160386	0.000431	0.017111	0.092617	0.106448	0.0007055	0.034612	1.06944
IGDB06807	IGDB06807.3	2.40019	2.67333	0	0.0443015	0.0795495	0.0455545	0.0263005	0.022336	0.068926	0.0060535	0.394236
IGDB06825	IGDB06825.1	39.3459	27.4073	6.65768	6.28898	5.54408	6.45682	8.32867	2.1638	0.133861	0.208913	0.0567275
IGDB06825	IGDB06825.2	17.059	25.0941	21.3847	18.3284	32.3117	30.5943	20.5286	11.5487	4.74921	4.24545	6.18449
IGDB06838	IGDB06838.1	0.513701	0.539919	0.782733	0.320657	0.648308	2.60268	2.8357	6.3551	6.55139	2.43517	3.62563
IGDB06838	IGDB06838.2	0.179345	0	0	0	0	2.28069	7.47868	17.3624	13.3738	10.5185	2.68216
IGDB06853	IGDB06853.1	0	0.0454845	0	0.0713005	0.169437	1.23662	1.45692	4.48024	4.44567	3.40241	6.42339
IGDB06853	IGDB06853.2	0	0.054063	0.782917	0.312449	0.043574	0.259873	1.75171	0.28231	1.66268	2.89552	2.45694
IGDB06869	IGDB06869.1	1.31917	1.21879	2.5965	6.34978	6.47717	7.02999	6.91595	6.68556	3.65448	2.41792	2.58626
IGDB06869	IGDB06869.2	10.9796	12.5496	10.5603	3.87362	0.167758	3.09348	5.34173	2.49975	0.06735	4.40256	0.0228075
IGDB06896	IGDB06896.1	0.280492	0.418492	2.23666	0.141369	0.0469065	0.06255	0.172117	0.304808	0.430239	0.567894	0.544422
IGDB06896	IGDB06896.2	2.53707	1.43402	0.989849	0	0	0	0	0	0.116404	0.188612	0.209173
IGDB06903	IGDB06903.1	11.2898	6.55343	0	0.086808	2.15154	1.4477	3.72828	1.85925	2.19864	2.12541	0.562623
IGDB06903	IGDB06903.2	0	0	0.52556	10.1776	20.149	24.0454	13.653	11.0323	5.8415	4.00751	5.68006
IGDB06906	IGDB06906.1	0.0297035	0	0	0	0.140694	0.164687	0.0181405	0.540038	2.19285	2.35665	0.693054
IGDB06906	IGDB06906.2	0.076145	0.050273	0.009688	0	0.062865	0.129719	0.125303	0.529579	2.02648	1.63685	0.295625
IGDB06931	IGDB06931.1	10.3008	13.5989	33.901	9.54452	6.58031	8.39955	11.384	9.22586	3.41798	4.02165	2.10087
IGDB06931	IGDB06931.2	10.5767	8.9504	1.9944	1.21644	3.48839	6.76377	10.4578	7.57339	6.89109	2.49163	2.14234
IGDB06931	IGDB06931.3	0	0	0.012538	0.000726	0.0002465	0.014876	0.0005245	0.0005895	0.0100025	0.001926	0
IGDB06956	IGDB06956.1	0.0068255	0.164709	0.248239	1.60144	1.11063	0.758378	0.478447	0.656914	0.296857	0.257508	0.135614
IGDB06956	IGDB06956.2	0	0.039822	0.137702	4.3228	3.26064	19.9275	28.529	18.1073	8.54173	4.71916	1.10763
IGDB06995	IGDB06995.1	0	0	0	0.037265	0.0130385	0.456479	0.404259	1.41742	3.56845	1.99546	3.76744
IGDB06995	IGDB06995.2	0	0	0	0.009462	0.014122	3.40698	12.4555	70.5139	147.264	96.6274	181.775
IGDB06995	IGDB06995.3	0	0	0	0	0.038067	0.0280885	0.0278845	0.129913	0.540248	0.195731	0.946152
IGDB06995	IGDB06995.4	0	0	0	0.0035085	0.006849	0.133652	0.316119	1.53465	6.83223	6.37586	6.77601
IGDB07002	IGDB07002.1	19.5356	15.0841	4.78725	6.46166	10.8618	10.5555	9.40781	7.85762	3.48334	3.15948	2.94389
IGDB07002	IGDB07002.2	15.4593	17.7788	7.53274	7.97713	6.80363	12.0046	9.81728	8.05739	4.89844	3.36761	4.27764
IGDB07002	IGDB07002.3	0	0	0	0	0	0	0	0	0	0	0
IGDB07018	IGDB07018.1	0	0	0.053648	0	0	0	0	0	0	0	0
IGDB07018	IGDB07018.2	0.0171335	0.50819	0.257521	0.043898	0.060726	0.514158	0.941686	2.0741	2.18455	3.3347	4.81065
IGDB07018	IGDB07018.3	0	0.282426	0.119274	0	0	0.237856	1.36711	2.27663	7.63857	12.6697	23.142
IGDB07074	IGDB07074.1	1.0685	1.03746	0	0	0.85864	1.2112	2.51617	3.5474	6.15208	4.55061	0.606167
IGDB07074	IGDB07074.2	0.0195255	0	0.0937885	0.042341	0	0.427472	0	0	0.575823	0.822959	0.200597
IGDB07074	IGDB07074.3	0	0	0	0	0	3.37426	4.11226	4.23008	1.987	2.0856	0.762906
IGDB07107	IGDB07107.1	0.039708	0.143177	0.120946	0.0417645	0.455788	0.789658	2.26333	3.50742	3.11931	3.18893	0.967846
IGDB07107	IGDB07107.2	0	0.002214	0	0.0087115	0.209537	5.76199	9.4976	29.5595	23.0856	18.2743	5.57738
IGDB07107	IGDB07107.3	0	0	0	0	0	0	0	0	0	0	0.0090295
IGDB07114	IGDB07114.1	0	0	1.87605	2.59979	2.17271	3.02264	5.09609	2.93539	3.38288	2.46224	0.631903
IGDB07114	IGDB07114.2	3.5695	2.71254	0	0	0	0	0	0	0.003647	0.0009705	0.0326365
IGDB07117	IGDB07117.1	0.996076	1.32888	0.18541	0.597296	0.587257	1.24044	0.40494	0.236145	0.168983	0.273346	0.82806
IGDB07117	IGDB07117.2	0.0199	0.357954	0.339329	0.294425	0.380528	0.073139	0.0624445	0.049301	0.214916	0.0285505	0.047397
IGDB07117	IGDB07117.3	2.42903	0.63423	1.61044	3.96819	6.17834	5.21187	3.01286	3.32488	0.497406	1.31855	0.649401
IGDB07117	IGDB07117.4	0	0.198051	0.396616	0	0.279219	0.513889	0.690326	0	0	0.0719765	0.277541
IGDB07117	IGDB07117.5	0.012459	0.079353	0.242194	0.0736505	0.114789	0.150097	0.237403	0.268804	0.778875	0.0528975	0.049536
IGDB07130	IGDB07130.1	0.3328	0.449234	1.23901	0.778284	1.03643	0.924288	0.0203855	0.052682	0.319698	0.0490335	0.321437
IGDB07130	IGDB07130.2	0.0389265	0	1.81891	1.47174	0.968992	0.995925	2.57641	4.85896	6.51307	6.36727	8.55185
IGDB07179	IGDB07179.1	42.707	75.9432	19.2768	33.1283	48.1008	34.9323	23.2871	12.2237	6.12867	5.56905	10.8245
IGDB07179	IGDB07179.2	89.3448	25.3657	4.08982	5.42247	9.55032	11.0915	7.22918	4.77805	1.93185	3.32792	3.92043
IGDB07179	IGDB07179.3	0.121036	1.06433	0.59036	0.924455	1.28408	0.62542	0.544905	0.566654	0.087556	0.0405625	0.217913
IGDB07204	IGDB07204.1	0.758039	1.06099	2.06715	0.65946	0.133434	0.507757	0.162275	0.503667	0.288135	0.447317	1.27314
IGDB07204	IGDB07204.2	1.66177	0.57757	1.17336	4.32282	5.04306	3.30473	3.47005	5.04073	2.52599	1.93469	2.48694
IGDB07204	IGDB07204.3	3.64182	4.46038	7.3958	1.44077	2.25739	4.84219	5.42761	3.35196	4.06797	5.28352	3.0575
IGDB07232	IGDB07232.1	0	0	0	0	0	0	0	0.380501	50.6413	243.418	680.998
IGDB07232	IGDB07232.2	0.055997	0.013212	0	0	0	0	0	0.107687	7.18229	20.9041	149.834
IGDB07234	IGDB07234.1	40.9191	0	4.3749	4.00663	0.0097255	2.8094	0	0.728924	0	3.91887	0.822483
IGDB07234	IGDB07234.2	1.41129	24.0116	15.0057	0.339927	2.91648	0.0469135	5.05665	5.336	6.63597	0.539346	0
IGDB07234	IGDB07234.3	64.0602	84.1856	14.4189	7.04752	4.60658	3.77081	2.33225	1.86194	0.631157	1.9788	1.31129
IGDB07234	IGDB07234.4	0	0	0	0	0	0	0	0	0	0	0
IGDB07285	IGDB07285.1	0.310107	0.718702	0.364058	0.387172	0.166433	0.566256	0.879225	5.84291	5.94539	6.90545	2.31622
IGDB07285	IGDB07285.2	0	0	0	0	0	0	0	0	0	0	0
IGDB07285	IGDB07285.3	0	0	0	0.032069	0.327806	0.833537	1.93214	3.4075	8.20317	6.0044	7.0271
IGDB07287	IGDB07287.1	4.8118	7.134	3.82768	0.260084	1.74599	2.77353	7.32386	6.06368	0.462558	2.01097	1.30426
IGDB07287	IGDB07287.2	0	0	1.31252	0.145021	1.09049	0.54571	0	1.20147	0	0	0
IGDB07287	IGDB07287.3	0.30548	0.144317	0.636501	0.67494	7.02254	3.57252	7.04305	4.38138	0.442853	0.953772	1.12669
IGDB07287	IGDB07287.4	0	0.905493	0	0	5.16449	6.01634	8.55143	8.86694	5.96666	2.5195	1.60767
IGDB07287	IGDB07287.5	0	0	2.6006	18.7764	11.1254	10.7378	9.99206	13.0666	9.23251	8.00869	7.40651
IGDB07287	IGDB07287.6	1.68663	2.86369	2.90861	3.42511	2.4264	2.78921	3.89047	3.49858	1.98367	1.02798	0.565516
IGDB07292	IGDB07292.1	0.0111515	0.008949	0.0355895	0.174326	0.0918385	0	0	0	0.809583	9.61753	6.02943
IGDB07292	IGDB07292.2	0.040445	0.515786	0.191008	1.63421	0.235308	0.327071	0.29025	0.57658	0.401835	0	0
IGDB07292	IGDB07292.3	0	0	0.049186	0.951607	0.215561	0.0708905	0	0.0430505	0.096539	0.0103825	0.046806
IGDB07300	IGDB07300.1	0.083592	0.464402	0.682289	1.38939	1.79515	2.79806	3.96875	5.13556	3.4714	0.849561	0.208382
IGDB07300	IGDB07300.2	0	0	0	0	0.477444	3.28866	5.78195	8.16925	5.87942	3.69359	0.880887
IGDB07352	IGDB07352.1	0.27873	0.405452	0	0.109487	0.264477	5.57463	10.3679	10.6484	6.67484	3.34794	0.760031
IGDB07352	IGDB07352.2	0.20903	0.27585	0	0	0.519197	5.30121	7.40388	11.6444	3.46023	3.56522	0.840466
IGDB07352	IGDB07352.3	0	0	0	0	0	0	0	0	0	0	0
IGDB07361	IGDB07361.1	0.290499	0.256626	0.221827	0.041784	0.0941595	0.170326	0.419366	0.323037	1.14055	0.283432	0.992965
IGDB07361	IGDB07361.2	0	0	0	0	0	0.037867	0.040486	1.16977	2.54621	1.79614	0.163352
IGDB07361	IGDB07361.3	0	0	0	0	0	0	0.0244005	0.417112	1.40205	1.70435	0
IGDB07361	IGDB07361.4	0	0	0	0	0	0	0	0	0	0	0
IGDB07361	IGDB07361.5	0	0	0	0	0	0	0	0	0	0	0
IGDB07366	IGDB07366.1	0	0	0.297712	0	1.65629	4.19111	9.28066	10.9271	5.98449	8.50229	4.93308
IGDB07366	IGDB07366.2	0	0	0	0	0.283343	0	0.331365	3.32072	2.28511	0.905767	1.50543
IGDB07366	IGDB07366.3	0	0	0	0.269351	0	0	0.237769	0.0801255	0.0571385	0.29904	0
IGDB07366	IGDB07366.4	0	0	0	0	0	0.0075325	0.0149605	0.088332	0.0248725	0.0158605	0
IGDB07366	IGDB07366.5	0.012571	0	0	0	0	0.0117665	0	0	0.0990155	0	0
IGDB07366	IGDB07366.6	1.31532	0.86564	0.111173	0.11888	0.0423005	0.138206	0.373125	0.435062	0.384906	0.231936	0
IGDB07384	IGDB07384.1	0.009101	0	0.0062525	0	0.0248265	0.381139	0.843859	1.28039	1.64709	0.927062	0.282141
IGDB07384	IGDB07384.2	0.004775	0	0.0013555	0	0.0662195	0.461543	0.60682	0.717186	1.17361	0.863107	0.108226
IGDB07384	IGDB07384.3	0	0	0	0.022331	0	0.071808	0.132023	0.115287	0.245728	0.196741	0.0557155
IGDB07384	IGDB07384.4	0	0	0	0	0	0.118421	0.229606	0.213817	0.293059	0.166504	0.046492
IGDB07385	IGDB07385.1	5.77138	5.03371	4.56818	2.14416	2.4868	1.28118	0.856476	1.7007	1.31814	0.591948	2.51538
IGDB07385	IGDB07385.2	14.2632	9.95769	5.07968	1.44678	1.04502	2.10247	3.08067	2.00169	3.07426	4.50449	1.39365
IGDB07386	IGDB07386.1	0	0	0	0.0299575	0	0.545402	1.43158	4.23303	6.16335	4.43622	1.64408
IGDB07386	IGDB07386.2	5.20248	3.90976	0.075565	0.0319195	0.429997	0.261516	0.0757095	0.149085	0.462492	0.372227	0.227695
IGDB07414	IGDB07414.1	20.6398	7.48031	1.2961	14.8681	30.5336	37.9722	40.3281	31.4807	20.3363	13.6963	13.4709
IGDB07414	IGDB07414.2	0	0	0	0.187267	0.223624	0.125152	0.314187	0.110984	0.246459	0.0756435	0.0688735
IGDB07414	IGDB07414.3	0	0	0	0.766277	2.72986	2.61749	3.2114	3.56686	1.78828	1.52869	1.8532
IGDB07414	IGDB07414.4	21.6414	11.3224	4.58272	3.30502	3.91775	5.92611	7.01449	6.71363	2.87582	2.4347	1.7567
IGDB07453	IGDB07453.1	0	0	0	0	0	0	1.43683	0.337144	0.257974	0.422542	0
IGDB07453	IGDB07453.2	0.02371	0	0.0862535	0.076884	0.15001	0.8172	0.270002	3.74101	3.97402	2.40384	1.2597
IGDB07461	IGDB07461.1	0	0.090515	0.491449	0.190047	0.334655	0.951095	0.661316	1.42105	0.480531	3.17066	1.02236
IGDB07461	IGDB07461.2	0	0	0.67247	0	0.11676	1.71442	6.40717	16.2797	25.3261	14.5831	2.04162
IGDB07494	IGDB07494.1	7.9947	5.00718	0	0.0424655	0.279463	0	0.131536	0.0618005	0.0978455	0.0194975	0
IGDB07494	IGDB07494.2	1.03665	0.589672	0.0858615	0.209321	0.0890695	0.151696	0.075029	0.202944	0.313694	0.191369	0.347606
IGDB07507	IGDB07507.1	0	0.0871045	0	0	0.017203	0.079401	0.0869315	0.035122	0.144751	0.121039	0.0092065
IGDB07507	IGDB07507.2	0.086853	0.0297945	0.185964	0.0707745	0.032504	0.268978	0.279583	1.16793	4.70203	1.22148	0.108002
IGDB07507	IGDB07507.3	0	0	0.43042	0.0082885	0.186787	1.76904	5.18223	18.662	18.7836	14.0724	4.72773
IGDB07512	IGDB07512.1	0	0	0	3.37311	3.52561	3.85729	4.72349	4.33545	3.06275	3.5465	2.71876
IGDB07512	IGDB07512.2	0	0.534812	0.837526	0.127579	1.19809	0.97426	0.065439	0.031983	0.040502	0.70583	0.150718
IGDB07517	IGDB07517.1	0	0.0284365	0.10741	0.108833	0.561507	3.10764	6.38071	7.8983	3.23765	5.08105	1.00629
IGDB07517	IGDB07517.2	0	0	0	0	0.145009	1.75796	4.20505	8.3845	7.73473	6.36614	2.99493
IGDB07517	IGDB07517.3	0	0	0	0.020817	0.01212	0.131084	0.816166	0.402782	0.281747	0.414114	0.185651
IGDB07525	IGDB07525.1	0.0809725	0	0	0	0	1.9926	3.53457	5.11883	2.76619	2.5666	0.614631
IGDB07525	IGDB07525.2	0	0	0	0	0	0	0.0018065	0	0.0019885	0	0.968103
IGDB07525	IGDB07525.3	0.10318	0.466568	0.238504	0.988803	0.108162	0.992139	1.92172	3.34388	2.22333	3.55542	1.07726
IGDB07525	IGDB07525.4	0	0	0	0	0	0	0	0	0	0.54201	4.02399
IGDB07525	IGDB07525.5	0.583832	0.143467	0	0	1.43338	2.48492	3.79121	6.20427	6.12046	1.89796	1.29123
IGDB07525	IGDB07525.6	0.407747	0.463541	0	0	0.639774	3.42815	8.70227	16.3851	9.15571	2.79559	1.40966
IGDB07552	IGDB07552.1	9.01752	2.18337	0.11998	0.820335	1.72328	2.05979	1.67134	0.266278	1.83319	2.57285	1.32037
IGDB07552	IGDB07552.2	0	0	0	0	0	0	0	0	0	0	0.062066
IGDB07552	IGDB07552.3	32.0509	11.9935	0.198395	0	1.72592	3.35576	3.9023	4.96713	0	1.59362	3.73753
IGDB07561	IGDB07561.1	0	0.380526	0.226365	1.14989	0.834186	0.856963	1.26904	0.699737	1.43241	1.98498	0.426209
IGDB07561	IGDB07561.2	0.013045	0.069288	0.339272	0.751681	2.02406	3.69028	7.27179	13.8183	15.7101	11.5213	4.64488
IGDB07583	IGDB07583.1	4.00016	3.54168	0.826496	3.34558	2.92781	6.9457	8.49423	14.7787	13.2397	12.9548	11.012
IGDB07583	IGDB07583.2	0	0	0	0	6.05479	4.0968	4.86193	2.4196	5.62235	8.56444	5.40221
IGDB07586	IGDB07586.1	16.2544	10.1009	10.3748	6.91554	9.29778	5.85482	6.13234	1.30197	2.56573	9.44259	3.8681
IGDB07586	IGDB07586.2	0	0.000931	0	0	0.0004045	0.0085595	0.020373	0.000891	0.0301825	0.0250215	0.012186
IGDB07586	IGDB07586.3	0.035231	0.0064705	0.0536785	0.016391	0.0120325	0.0297355	0.029003	0.068069	0.025539	0.0415225	0.188763
IGDB07586	IGDB07586.4	0	0	0	0	0.0130285	0.023013	0.056109	0.0068695	0	0	0.009866
IGDB07586	IGDB07586.5	0	0.0247475	0	0.066022	0.212484	0	0	0	0	0.420749	0.0060655
IGDB07586	IGDB07586.6	2.07011	1.40118	1.3282	0.957675	0.619992	3.0907	2.24722	2.58715	2.07457	0	1.11432
IGDB07586	IGDB07586.7	18.6668	12.2497	11.5136	5.89769	5.16563	7.88544	8.9215	11.0433	8.23911	4.10109	10.4341
IGDB07586	IGDB07586.8	0	0	0.002215	0.0011805	0.0019055	0.002201	0.00121	0	0	0	0.0054975
IGDB07605	IGDB07605.1	2.96322	0.402939	0.270464	0.970673	0.158832	0	0.217019	0.114421	0.138633	0.470643	0.011622
IGDB07605	IGDB07605.2	1.86675	3.20371	8.78096	5.47929	8.69994	16.6861	22.6322	18.5581	14.316	11.6276	15.3029
IGDB07605	IGDB07605.3	0.008421	0.0039385	10.7298	8.20962	7.5964	5.55076	0.224457	3.12411	0.845506	7.44297	2.43046
IGDB07605	IGDB07605.4	0	0	0	0	0	0.745975	2.65331	2.45043	5.91349	1.9786	2.06247
IGDB07615	IGDB07615.1	0.073649	0.243843	0.174784	0.747524	0.264204	0	2.72315	3.10571	2.9165	2.75293	1.36999
IGDB07615	IGDB07615.2	0	0	0.379343	0.0040405	1.17975	0.702368	4.00468	3.4405	3.19388	3.11501	1.79514
IGDB07615	IGDB07615.3	0	0	0	0	0.338768	9.1124	11.509	15.008	6.12328	5.18672	1.36698
IGDB07615	IGDB07615.4	0	0	0.154658	0	0	0.0253945	1.34607	1.13434	0.703766	0.443373	0
IGDB07615	IGDB07615.5	0	0.0036065	0	0	1.07558	1.13395	4.77907	3.96536	9.70979	6.95126	3.30807
IGDB07618	IGDB07618.1	0	0	0.091153	0	0.153843	0	0.352249	1.03559	2.31243	1.11901	0.782537
IGDB07618	IGDB07618.10	0	0	0	0.0027235	0	0	0	0	0	0	0
IGDB07618	IGDB07618.2	0	0	0	0	0	0	0	0	0	1.07733	0
IGDB07618	IGDB07618.3	9.65776	5.65518	0	0.475087	0.136494	0.0569095	0	4.46512	12.3473	9.18751	11.0607
IGDB07618	IGDB07618.4	1.62737	1.80485	0	0.038724	0	0.021628	0	0.186556	0.481121	0	1.29358
IGDB07618	IGDB07618.5	0	0	0	0	0	0	0	0.001644	0.20703	0.223541	0.0108695
IGDB07618	IGDB07618.6	0	0	0	0	0	0	0	0	0	0	0
IGDB07618	IGDB07618.7	0.142735	0.107287	0	0.01889	0.0215825	0.20333	0	0	0	0	0.003402
IGDB07618	IGDB07618.8	0	0	0	0	0	0	0	0	0	0	0
IGDB07618	IGDB07618.9	0.822117	0.735266	0.058052	0.083225	0	0.047494	0	0	0	0	0
IGDB07667	IGDB07667.1	0.045149	0.316138	0.013769	0.127699	0.144661	2.87319	3.055	2.85462	1.33953	0.663405	0.258009
IGDB07667	IGDB07667.2	0	0	0	0	0	2.07897	3.93461	4.94053	3.16092	1.73358	0.549727
IGDB07669	IGDB07669.1	1.18438	2.72912	1.28121	2.13852	1.68489	1.39721	2.17764	1.57329	0.621305	0.557296	0.188798
IGDB07669	IGDB07669.2	2.5317	0.830785	0	0	0	0.136118	0	0	0	0	0.335514
IGDB07669	IGDB07669.3	1.47315	0.814311	1.44754	0	0	1.01727	1.10478	1.39004	1.17928	1.14007	0.338931
IGDB07691	IGDB07691.1	23.3841	16.3049	17.2825	13.5125	20.972	5.02719	3.66808	1.66155	3.34526	7.5868	7.7392
IGDB07691	IGDB07691.2	5.33219	60.8144	77.8894	69.8854	49.6529	154.465	184.258	164.844	86.2404	52.5201	34.0619
IGDB07729	IGDB07729.1	0	0	0	5.97059	14.6044	4.019	13.633	17.1115	11.4243	7.14919	6.07643
IGDB07729	IGDB07729.2	0	0.0250535	0	0	0	0.002747	0.001408	0	0	1.98116	0
IGDB07729	IGDB07729.3	1.12982	1.34443	6.51056	0	0.0057575	4.10629	3.84106	9.0424	1.28241	3.29713	0.0002355
IGDB07729	IGDB07729.4	1.4295	2.57529	0	14.4766	1.51254	13.3735	7.45838	6.81017	2.0393	0.86759	0.431567
IGDB07729	IGDB07729.5	0	0	0	0	0.827349	0	0.044805	0	0	0	0.285554
IGDB07739	IGDB07739.1	1.88478	0	0.0004075	1.50707	1.06274	4.56677	10.0461	13.0147	9.55039	7.55505	2.66743
IGDB07739	IGDB07739.2	5.44682	8.25278	4.46642	2.61401	4.90737	5.17333	6.41357	4.59566	2.73839	3.69233	0.941845
IGDB07743	IGDB07743.1	0	0.45558	8.65805	9.06561	8.91268	6.61816	12.3577	10.9744	6.36191	5.83608	2.0034
IGDB07743	IGDB07743.2	1.89432	0.927878	1.88164	0	1.22264	2.14606	0.629848	0.276617	0	0	1.90755
IGDB07743	IGDB07743.3	0	0	0.273859	0.0044135	0.009784	0.0034415	0	0.0014625	0	0.0013035	0
IGDB07743	IGDB07743.4	0	0.0338525	0.083538	0.0073775	0	0.069249	0.0474895	0.0175795	0.0102005	0	0
IGDB07764	IGDB07764.1	0	0.0339615	0.004721	0	0.394999	1.15397	1.49858	0.483608	3.78032	3.3973	1.81081
IGDB07764	IGDB07764.2	0	0.340643	0.754358	0.0262235	0.268338	0	0.368775	0.480083	0.445489	0.941812	0.504908
IGDB07764	IGDB07764.3	0.0105675	2.05187	0	0.530718	0.784444	0	0	0.0332485	0.278947	0.630314	0
IGDB07764	IGDB07764.4	9.52776	1.54333	0.662488	0.26342	0	1.07197	0.589746	2.30707	0.220737	0.19245	5.79855
IGDB07764	IGDB07764.5	1.19093	3.10213	7.54664	0.261473	0	0	1.18083	0.708591	1.6398	2.47848	4.54284
IGDB07776	IGDB07776.1	0.074702	0	0.391066	0.477085	0.189049	1.19242	0.291888	0.250221	1.22204	1.23601	0.916972
IGDB07776	IGDB07776.2	0	0.211126	0.157348	1.6392	3.98914	6.23119	11.2071	9.318	6.44165	8.45836	3.18393
IGDB07776	IGDB07776.3	0	0	0	0	0.000727	0.0032905	0.019774	0.0062365	0.0014245	0.0008705	0
IGDB07787	IGDB07787.1	0.149179	0.550864	0.608537	0.682385	1.29335	0	0.379835	0.030073	0.424401	2.06594	0.618675
IGDB07787	IGDB07787.2	0	0	0	0.36788	1.27906	2.62025	2.81618	4.0305	5.39712	2.57987	3.1613
IGDB07787	IGDB07787.3	0	0	0	0	0.2845	1.67819	0.952084	1.19119	0.420967	0.77813	4.74911
IGDB07787	IGDB07787.4	0.0230155	0.032084	0	1.07524	1.93264	0.736214	3.01891	1.37839	1.25309	1.76446	1.76518
IGDB07797	IGDB07797.1	0.162714	0	0.130458	0.241618	0.097101	0	0.981067	0	3.10987	2.01836	0
IGDB07797	IGDB07797.2	0	0	0	0	0.391365	0	0	1.13548	2.28496	1.36367	0
IGDB07797	IGDB07797.3	0.116734	0.303225	0.092611	0.1383	0.179506	1.16906	0.825782	3.83588	1.34303	2.94507	4.97833
IGDB07798	IGDB07798.1	0	0	0	0	0	0.006741	0	0.010214	0	0	0.0089275
IGDB07798	IGDB07798.2	0.61966	0.544968	1.17826	0.461412	0.667459	2.3792	1.90104	2.69535	2.77589	2.38641	0.906048
IGDB07798	IGDB07798.3	2.40332	2.38517	0.304722	1.12981	2.12545	2.82099	4.9249	6.43941	4.13678	3.75125	1.04828
IGDB07812	IGDB07812.1	2.91958	1.32698	0.295501	0.0185	0.0787615	0.582485	1.0024	4.62577	3.46367	3.153	0.61654
IGDB07812	IGDB07812.2	0	0	0	0	0	0	0.064352	1.31978	3.67959	2.00311	0.976339
IGDB07812	IGDB07812.3	1.72941	2.65736	0.0685715	0	0	0	0.504578	0.776259	1.26157	0.73567	0.295357
IGDB07812	IGDB07812.4	0	0	0	0	0	0	0	0	0	0	0
IGDB07852	IGDB07852.1	0.028174	3.64435	1.02959	0.616512	0.676786	0.61687	0.368364	0.481356	1.34134	0.417276	0.903711
IGDB07852	IGDB07852.2	0.003197	62.755	28.0362	6.00116	6.21998	5.90073	4.38882	4.7618	9.89579	7.37646	21.4401
IGDB07882	IGDB07882.1	0	0.161562	0.12102	0.0027975	1.6805	0.085244	0.081595	0.0944875	0.298876	0.357302	0
IGDB07882	IGDB07882.2	0	0.061201	2.42513	3.7976	4.63208	11.0659	13.8883	14.4638	9.71454	10.0317	4.93899
IGDB07902	IGDB07902.1	0.026595	0.0684715	0.16801	0.436872	1.54326	2.31156	3.17001	3.95638	1.77502	1.34074	2.99642
IGDB07902	IGDB07902.2	0	0	0	0	2.0926	3.8665	7.13913	8.01635	5.67054	6.12734	7.63967
IGDB07904	IGDB07904.1	1.40836	1.26485	0.0377055	0.134854	0.039014	0.088763	0.110107	0.938447	2.93073	2.20932	0.729777
IGDB07904	IGDB07904.2	0.192546	0.118187	0	0	0	0	0	0.006686	0	0	0
IGDB07904	IGDB07904.3	2.18705	2.19193	0	0.005642	0	0	0	0.42938	6.57512	4.28534	0.900338
IGDB07905	IGDB07905.1	0	0.0477955	0	0	0	0	0.224662	2.60061	5.26182	3.87205	1.36919
IGDB07905	IGDB07905.2	0.171854	0.115097	0.0433965	0.0097385	0.143588	0.0925775	0.035621	0	0	0	1.07429
IGDB07905	IGDB07905.3	0	0.029055	0	0	0	0	0.0091155	1.58863	3.88803	3.64554	0
IGDB07916	IGDB07916.1	6.30808	0	7.95443	1.88236	0.833993	0.686192	0.0500655	0.76612	1.1131	5.00736	1.8256
IGDB07916	IGDB07916.2	7.92067	12.7593	0	0.985269	0.85177	0.413859	1.40924	0.860978	1.02232	0	0
IGDB07943	IGDB07943.1	77.2678	84.6871	355.387	157.298	85.8773	127.065	157.182	28.8545	90.1384	99.265	98.4445
IGDB07943	IGDB07943.2	64.0337	67.8629	229.498	224.876	137.636	110.944	125.706	100.514	62.7776	74.5472	80.6452
IGDB07949	IGDB07949.1	0	0	0	0	0	0.138166	0.312637	2.84258	9.10616	4.33274	0
IGDB07949	IGDB07949.2	0	0.0205595	0.018216	0.0161045	0.131491	0.068883	0.145795	1.38006	2.21133	1.3162	1.20136
IGDB07969	IGDB07969.1	17.6509	13.3823	9.26095	3.39919	2.05047	6.41544	7.50167	2.7997	4.56517	3.17925	4.21562
IGDB07969	IGDB07969.2	7.30324	3.44514	1.22002	3.55946	5.25587	2.25297	2.35081	5.07358	1.77213	4.92531	1.91482
IGDB07969	IGDB07969.3	0	0.0161625	0	0.02406	0.0206125	0	0	0	0	0	0.0123365
IGDB07972	IGDB07972.1	0.062717	0.119924	0.916606	0.524347	0.910891	0.424308	0.545048	0.832236	0.222225	1.20491	1.62859
IGDB07972	IGDB07972.2	0	0	0.404689	0.37941	0.0501705	0.734586	0.66648	0.0545985	0.565759	0.690427	0.438102
IGDB07972	IGDB07972.3	0	0.0290615	0.962154	0.756242	0.888876	0.908435	0.968144	1.10905	0.472795	1.38855	1.15914
IGDB07990	IGDB07990.1	0	0	0	0	0	0	0	0	0	0	0
IGDB07990	IGDB07990.2	0	0	0	0	0	0	0	0	0	0	0
IGDB07990	IGDB07990.3	0.016607	0.0631055	0.0399545	0	0	0	0.635886	4.28141	19.0515	12.3549	9.52022
IGDB07990	IGDB07990.4	0	0	0	0	0	0	0	0	2.91149	0	0
IGDB07990	IGDB07990.5	0	0	0.060263	0	0	0.11682	0.0624545	0.358787	6.38293	1.96775	1.00853
IGDB08025	IGDB08025.1	0	0.403994	0.83124	0.724988	0.770143	4.84527	7.45455	9.23216	6.46033	5.25059	1.94497
IGDB08025	IGDB08025.2	0	0	0.0008645	0	0.384902	5.52521	10.3924	9.98028	11.224	5.48856	2.29673
IGDB08049	IGDB08049.1	8.17124	8.56672	1.66515	1.53282	3.25664	6.00655	4.47841	4.05278	4.18978	4.92692	3.39824
IGDB08049	IGDB08049.2	50.977	37.5146	8.09427	19.6986	17.9997	34.4091	29.4249	21.5246	25.7969	36.1517	31.2197
IGDB08049	IGDB08049.3	42.3983	45.6061	15.2688	10.1582	12.4974	1.42589	11.4839	12.0752	0.760894	4.33071	3.54092
IGDB08051	IGDB08051.1	0.0199665	0.0141125	0.012529	0.0838115	0	0.871393	0.057336	0	0	0	0
IGDB08051	IGDB08051.2	0	0	0	0.052603	1.31649	1.34522	2.85643	8.30521	12.4944	13.9545	9.81496
IGDB08051	IGDB08051.3	0.007835	0	0	0.101431	0.379451	0.401911	0.660498	2.72055	2.70134	2.12439	1.11001
IGDB08068	IGDB08068.1	0	0.0478785	0.0081925	0.0218145	0.0956245	0.420254	0	1.50562	1.50926	0.195618	1.16804
IGDB08068	IGDB08068.2	0	0	0	0	0.175089	0.316661	0.869739	1.47026	1.82206	1.52477	0.225546
IGDB08068	IGDB08068.3	0	0	0	0	0.0581035	0.032451	0	0	0	0	0.021125
IGDB08068	IGDB08068.4	0	0	0	0	0	1.85118	5.01458	12.4318	11.5648	8.2647	1.15156
IGDB08068	IGDB08068.5	0	0	0	0	0	0.177374	0.124222	0.525335	1.37052	1.47435	2.37222
IGDB08070	IGDB08070.1	0	0	0.0219935	0.217269	0.387194	0.853856	1.97779	0.466564	0	0.935736	0.41157
IGDB08070	IGDB08070.2	0	0	0	0	0	0.0080355	0.0182325	1.24935	2.93986	0	0
IGDB08070	IGDB08070.3	0.0310285	0.050074	0.0253005	0	0.029127	0.0232115	0.56665	5.95e-05	0	0.000369	6.25e-05
IGDB08070	IGDB08070.4	0	0	0	0	0	0.0143365	0	0.0740335	0.192373	1.686	0.552593
IGDB08070	IGDB08070.5	0	0	0	0	0	0.169217	0	6.2029	4.81168	1.62335	0.659381
IGDB08077	IGDB08077.1	0.304863	0.174272	0.0248995	0.088875	0.19877	0.974857	2.63682	3.38873	4.60633	2.82183	0.805195
IGDB08077	IGDB08077.2	0	0.0530425	0.043594	0	0.0291215	0.536993	1.64279	2.6196	2.7664	2.30902	0.269709
IGDB08106	IGDB08106.1	0	0	0.003207	0	0	0.225029	0.0156005	0.014387	0.316783	0.529607	0.219529
IGDB08106	IGDB08106.2	0.063121	1.1112	3.62065	2.88939	3.92616	5.04456	6.14227	8.76292	11.9249	7.95339	8.12392
IGDB08106	IGDB08106.3	0	0	0	0	0	0.237068	0	0	0	1.73322	0
IGDB08106	IGDB08106.4	0	0.097093	5.56742	1.04485	0.742037	1.20457	0.843602	1.51647	1.78281	1.77111	1.39124
IGDB08112	IGDB08112.1	1.23741	1.95915	0.953639	1.76347	4.55933	3.48291	1.42245	1.86404	0.561462	1.51791	0.974809
IGDB08112	IGDB08112.2	0.455304	0.0501665	3.30097	1.15542	0.464889	0.747871	2.5748	1.93721	5.90628	5.21521	3.58947
IGDB08112	IGDB08112.3	0	0	0.081156	0	0.07341	0.107831	1.87172	3.91484	6.23478	6.71185	3.73133
IGDB08112	IGDB08112.4	0	0	0	0	0	0	0	0.673086	2.12414	0.952243	0.588948
IGDB08124	IGDB08124.1	0	0.173624	0	0.052022	0.0654875	0.0328985	0.98419	0.862985	0.918907	1.35638	2.95953
IGDB08124	IGDB08124.2	3.31	1.19128	0	0	0.132786	1.24909	0	1.549	3.66205	1.57035	1.03516
IGDB08124	IGDB08124.3	0	0.583275	0.02185	0.252319	0.398103	0.010777	0.646309	0	0	0.198901	0
IGDB08124	IGDB08124.4	0	0	0	0	0	0	0	0	0.023223	0.172502	0.186622
IGDB08133	IGDB08133.1	0.223561	0.242877	0.581529	0.469181	0.825152	1.03922	0.556211	1.23117	1.28195	1.13853	1.91508
IGDB08133	IGDB08133.2	0.316406	0.108424	0.440385	1.07785	1.01125	0.957283	1.07737	1.65593	2.55067	2.21981	1.99615
IGDB08136	IGDB08136.1	0	0	0	0	0	0	1.66879	0	0	0	0.759339
IGDB08136	IGDB08136.10	0	0.008227	0	0	0.306569	0.357671	0.023799	0.632687	0.961386	0.0203395	0.138922
IGDB08136	IGDB08136.2	0.152888	0.458975	0.189414	0.505571	1.02387	0.850286	2.51861	2.6176	1.47224	1.96333	1.52052
IGDB08136	IGDB08136.3	0	0	0	0	0	0.838808	1.24345	0.720676	1.14047	1.27184	0
IGDB08136	IGDB08136.4	0.496547	0.089795	0	0.296913	1.23272	2.16452	3.04865	4.32527	2.01285	1.98197	0.781622
IGDB08136	IGDB08136.5	0	0	0	0	0.0272565	0	0.820663	1.22637	0.897697	0	0
IGDB08136	IGDB08136.6	0	0	0	0	0.309403	0.947384	0.227791	1.05348	1.63497	0	0.191106
IGDB08136	IGDB08136.7	0.204589	0.079271	0	0.22149	1.1971	3.25743	6.08629	8.78656	7.45764	2.88824	1.32407
IGDB08136	IGDB08136.8	1.70422	0.106527	0	0	0.012882	0.005215	1.4279	0.0048075	0.0007495	0.0070375	0.063276
IGDB08136	IGDB08136.9	0.0712805	0	0.118458	0.042567	0.088153	0.197064	0.26236	0.390283	0.358061	0.083404	0.018223
IGDB08170	IGDB08170.1	0	1.44081	4.03852	6.94595	7.86294	7.03877	6.64356	5.89376	7.8474	6.37046	3.83723
IGDB08170	IGDB08170.2	1.52744	1.06149	3.88672	0.0944885	0.0939095	0.16815	0.510552	0.51632	0.068868	0.04917	0.729588
IGDB08193	IGDB08193.1	0	0.053762	0.512826	1.00395	1.03964	1.00231	0.877047	1.45394	0.636846	0.449325	0.747028
IGDB08193	IGDB08193.2	0.114156	0.105364	0.516015	0.929218	1.0697	0.926422	0.851993	0.6542	0.179978	0.193046	0.262669
IGDB08208	IGDB08208.1	0.10086	0.327091	0.423882	0.239588	0.28499	0.221593	0.89438	0.689029	1.19502	0.438584	0.225687
IGDB08208	IGDB08208.2	0.887748	0.471597	0.227164	0	0.204656	0.82433	1.49286	3.77254	2.54051	1.64744	0.393275
IGDB08210	IGDB08210.1	0.000901	0.0009925	0	0	0.285699	0.1283	0.153623	0.535034	0	0	0
IGDB08210	IGDB08210.2	0.005886	0.003928	0	0	0	0.03489	0	0	0.653604	0.0723495	0.116401
IGDB08210	IGDB08210.3	0.0903705	0.372675	0.171255	0.392703	0.836592	0.410976	0.479587	0.552397	1.75568	0.174456	0.246399
IGDB08210	IGDB08210.4	0.042357	0	0	0	0.019282	0	0.065109	0.0132575	0.0740885	0.0080825	0
IGDB08210	IGDB08210.5	0	0	0	0	0.0023645	0	0.014032	0.007423	0.037067	0.002775	0
IGDB08210	IGDB08210.6	0	0	0	0	0	0	0	0	0	0	0
IGDB08210	IGDB08210.7	0.19234	0.0052275	0	0	0.214535	0.483511	1.35719	5.05473	2.52242	3.19257	0.785008
IGDB08210	IGDB08210.8	0	0.0100115	0.0114695	0.0088965	0.116229	0.973186	2.11143	2.65853	3.51669	2.96881	0.973403
IGDB08215	IGDB08215.1	6.61335	8.39695	1.46922	1.4167	2.07291	2.12886	2.69666	3.89302	5.9374	3.87659	1.93556
IGDB08215	IGDB08215.2	13.295	17.731	2.27745	1.42987	1.28266	1.06538	1.10493	1.38491	1.25263	0.869657	1.18853
IGDB08225	IGDB08225.1	0	0	0	0	0	10.2121	20.8303	22.6991	15.4514	11.9394	6.72828
IGDB08225	IGDB08225.2	0	0	0	0.542247	2.02156	3.52967	4.14068	1.98548	1.9393	7.79703	8.51597
IGDB08225	IGDB08225.3	0.174277	0.269231	0.570251	0.827159	0.150229	0	0	1.39274	5.77453	3.60509	1.70226
IGDB08241	IGDB08241.1	0	0	0	0	0	5.96651	21.8683	19.4659	6.64528	6.62194	0
IGDB08241	IGDB08241.2	7.07756	3.79895	0.33985	0.618965	4.1212	0.005229	0	0	0.0007125	0	0.01615
IGDB08241	IGDB08241.3	0	0	0	0	0	0	0	0	0	0	0
IGDB08241	IGDB08241.4	0	0	0	0.736793	3.56203	2.00018	1.49344	2.35148	1.31119	0.737157	0.953632
IGDB08241	IGDB08241.5	7.79258	3.84576	0	0	0	7.50872	1.24266	1.51568	4.15744	1.07631	3.1407
IGDB08241	IGDB08241.6	0	0	0	0.0109935	0.13802	0	0	0	0	0	0
IGDB08255	IGDB08255.1	0.144606	0.114628	0.103118	0.283799	0.31953	0.2169	0.662821	1.07925	1.9827	1.24672	0.762496
IGDB08255	IGDB08255.2	0	0	0	0	0	0.364003	0.180176	0.794974	1.21206	0.924076	0.389804
IGDB08255	IGDB08255.3	0	0	0	0	0	0	0	0	0	0	0
IGDB08259	IGDB08259.1	0.285398	0.266527	0.0132425	0.010398	0.248611	0.737239	1.00631	1.99397	2.40536	1.84352	0.806918
IGDB08259	IGDB08259.2	0	0	0	0	0	0.240267	1.56564	1.3855	0.821173	1.24827	1.08333
IGDB08259	IGDB08259.3	0.014383	0	0	0	0.017414	0.106036	0.120317	0.471124	0.266432	0.0688125	0.0641065
IGDB08265	IGDB08265.1	0.053668	0.533987	0.533979	0.544851	0.298124	9.26361	19.6427	3.67062	3.8191	4.35589	6.11706
IGDB08265	IGDB08265.2	0	1.6582	3.25762	0.694647	7.8201	59.2852	52.724	12.6564	4.07937	3.59255	2.8754
IGDB08275	IGDB08275.1	149.05	50.8863	3.929	10.1011	7.66986	6.39443	10.313	15.2992	33.7624	30.6558	15.4436
IGDB08275	IGDB08275.2	5e-07	0	0	1.07035	5.90237	9.754	11.4381	19.2788	20.6588	13.7215	7.49964
IGDB08275	IGDB08275.3	0	0	0	2.92303	12.997	29.6786	45.8239	115.7	148.987	98.6089	45.5706
IGDB08302	IGDB08302.1	0.04641	0.019667	0.22895	0.0920055	0.383435	0.578592	0.344851	0.834937	0.962752	1.37286	0.358957
IGDB08302	IGDB08302.2	0.016953	0	0	0	0.124309	0.651433	1.37365	3.13572	8.55518	5.00942	2.47849
IGDB08305	IGDB08305.1	5.4096	0.653192	23.4132	0.668125	7.39088	13.8741	13.3217	15.6781	7.09701	7.50631	3.07391
IGDB08305	IGDB08305.10	10.8911	17.2171	12.0108	20.0424	18.4346	7.53579	5.72918	4.88384	2.72378	1.50429	0.803679
IGDB08305	IGDB08305.2	1.01445	23.7049	0	0	0	6.08269	20.1796	0	3.50161	2.19053	0
IGDB08305	IGDB08305.3	0	0	0	0	0	5.45489	0	0	0	0	0
IGDB08305	IGDB08305.4	0	0	0	0	0	0	0	0	3.18299	0	0
IGDB08305	IGDB08305.5	0	0.935724	0	2.22694	0	0	0	0	0	1.12201	0.551828
IGDB08305	IGDB08305.6	1.97147	0	0	0	19.7025	10.0186	0	0	8.13612	9.43249	7.7505
IGDB08305	IGDB08305.7	0	0	0	0	0	8.90985	9.63396	13.4769	0	0	0.91225
IGDB08305	IGDB08305.8	0	0	0	0	0	0	0	0	0	0	0
IGDB08305	IGDB08305.9	0	0	0	0	0	0	0	0	0	0	0.77564
IGDB08320	IGDB08320.1	0	0	0.88264	0	0	0	0	0	0	0.449891	0.934741
IGDB08320	IGDB08320.2	0	0	0	0.337314	0	0.017998	0	0	0.33037	0.034139	0
IGDB08320	IGDB08320.3	4.19707	2.65447	3.92993	0.95994	0	2.18705	2.55976	3.70719	2.14598	0.763885	1.58438
IGDB08320	IGDB08320.4	0	2.28631	1.43364	3.6574	8.40599	5.85578	5.72223	0.87267	1.68619	5.64088	4.9448
IGDB08360	IGDB08360.1	11.6829	10.2487	10.3962	19.0789	23.0402	18.4279	15.69	13.5358	8.54353	9.02179	7.41406
IGDB08360	IGDB08360.2	20.7562	11.5619	2.59439	5.57553	5.43645	5.29826	4.12862	1.72515	2.51645	2.66666	3.12333
IGDB08366	IGDB08366.1	0.0948105	0	0	0	0.770559	0.848172	0.556447	1.79472	3.04533	5.40125	1.12587
IGDB08366	IGDB08366.2	0.015655	0	0	0.17278	0.137807	0.167211	0.753072	6.61305	8.49582	1.45594	1.13555
IGDB08396	IGDB08396.1	1.26642	0.414089	0.705653	1.59158	0.832458	0.687858	0.682102	3.05215	3.9282	2.53934	2.17499
IGDB08396	IGDB08396.2	5.10699	4.66658	0.773733	0.742977	3.4627	2.588	2.47404	2.19483	2.37698	3.30041	3.2367
IGDB08422	IGDB08422.1	0.0346115	0.139595	0.180561	0.251125	0.074038	0.431266	0.732016	1.78713	1.19803	0.74105	0.641725
IGDB08422	IGDB08422.2	2.43033	0.756765	0	0.080922	0.810845	0.794484	2.38908	2.41954	1.51784	2.21674	0
IGDB08453	IGDB08453.1	0	0	0	0	0.206598	2.11175	3.58695	7.51638	6.27644	5.40851	5.94202
IGDB08453	IGDB08453.2	0.0081335	0.0774325	0.0521015	0.0992295	0.725319	0.593025	1.48116	0.465871	0.716645	0.524296	5.28725
IGDB08453	IGDB08453.3	0	0	0	0	0	0	0.061575	0.093129	0.022533	0.028088	0.07164
IGDB08467	IGDB08467.1	0	0	0.258306	26.7729	0	0.492879	1.57958	3.35419	7.25318	5.48314	2.47387
IGDB08467	IGDB08467.2	0	0.0552745	0.827348	5.82935	0.142567	1.28941	1.00672	5.40794	8.4857	4.81918	1.62627
IGDB08476	IGDB08476.1	0.194691	0.152331	0.049508	0.605495	0.30668	0.392459	1.06923	0.719248	0.423828	0.911428	0.380678
IGDB08476	IGDB08476.2	0	0	0	0.774511	1.16112	0.917875	0.255687	0.35741	0.920353	0.864368	0.266647
IGDB08476	IGDB08476.3	0	0	0	0	0	0	0	0	0.0170645	0	0
IGDB08476	IGDB08476.4	0	0	0	0	0	0	0	0	0	0	0
IGDB08502	IGDB08502.1	0.083833	0	0	0	0.315696	1.14948	1.6906	2.82526	3.76741	3.81249	2.89675
IGDB08502	IGDB08502.2	0.052779	0.0593945	0	0	0.512911	0.820701	1.18094	1.124	2.34473	1.64415	0.93698
IGDB08508	IGDB08508.1	0.023643	0	0.0983345	0	0.068424	0.0241745	0	0.093303	0.731904	0.620808	1.00056
IGDB08508	IGDB08508.2	0	0	0	0	0	0	0	0	2.43188	4.17232	2.74483
IGDB08516	IGDB08516.1	0.050694	0	0	0	0	0	0.062039	0	0	0.155016	1.46727
IGDB08516	IGDB08516.2	0	0	0	0	0	0	0	0	0	0	1.31821
IGDB08516	IGDB08516.3	0	0	0	0	0	0	0	0	0.026535	0.199908	1.12059
IGDB08516	IGDB08516.4	0	0	0	0	0	0	0	0	0	0	0
IGDB08531	IGDB08531.1	0	0.015582	0	0	0.0049455	0.479581	0.11601	2.79144	5.51756	1.43286	1.52646
IGDB08531	IGDB08531.2	1.04795	0.620955	0.582776	1.78008	1.46192	0.687963	1.96761	5.98123	5.00139	1.85835	1.12413
IGDB08531	IGDB08531.3	0	0	0	0	0	8.68493	18.1048	16.6616	11.0022	8.6907	2.73694
IGDB08605	IGDB08605.1	0.0423555	0	0	0	0	0.508837	0.664887	2.24387	3.59157	3.10247	0.920617
IGDB08605	IGDB08605.2	0.070806	0.409373	0.067344	0.0049385	0.169365	0.30553	0.92132	1.28752	1.6673	2.19376	0.427189
IGDB08605	IGDB08605.3	0	0	0	0	0	0	0.186557	0.780297	0.616681	0.846434	0.519477
IGDB08609	IGDB08609.1	1.3082	0.712078	1.19588	1.7061	3.31647	4.50647	3.54985	5.01625	3.67666	1.60374	1.34892
IGDB08609	IGDB08609.2	3.37451	1.8082	0.439532	4.09246	6.9265	9.80071	8.84448	5.17318	4.73102	4.74579	1.82156
IGDB08612	IGDB08612.1	0	0	0.818263	0.203593	0	0	0.303243	1.14643	2.3784	2.95289	2.80103
IGDB08612	IGDB08612.2	0	0	0.438999	0.10511	0	0.142952	0.241719	0.938066	3.05375	2.08699	2.39747
IGDB08618	IGDB08618.1	10.1664	6.35344	0.288496	0.228199	0.609478	0.59193	1.93774	4.38112	3.35249	1.433	1.32985
IGDB08618	IGDB08618.2	16.078	2.49894	0.223622	0.188559	0.389356	4.48069	6.43219	6.88457	7.53259	8.49897	2.73573
IGDB08618	IGDB08618.3	0	0.035146	0	0	0	0.00891	0.027515	0.088619	0.02095	0.02101	0.0078065
IGDB08654	IGDB08654.1	0	0.208883	0.142355	0.573405	0.89195	1.84443	2.6964	1.71345	1.71275	2.60407	2.23414
IGDB08654	IGDB08654.2	1.5933	1.21978	0.080774	0.320752	1.18661	0.775347	1.01316	2.90638	3.51144	1.08687	0.897234
IGDB08654	IGDB08654.3	0	0	0.0207935	0	0.769442	0.569526	0.458271	0.719527	0	0.558361	0.261383
IGDB08654	IGDB08654.4	0	0.032316	0	0.014771	0.012728	0.095586	0.0797075	0.291098	0.176341	0.125958	0.139078
IGDB08679	IGDB08679.1	0.006141	0.036058	0.0983105	0.307077	1.44355	3.18942	6.26464	6.32469	4.87962	3.51802	2.49629
IGDB08679	IGDB08679.2	0	0	0	0.045561	0.428826	3.669	7.18518	11.238	7.56339	3.98917	1.30178
IGDB08679	IGDB08679.3	0	0	0	0.002918	0.0138565	0.0222305	0.107156	0.170274	0.22802	0.164138	0.013498
IGDB08767	IGDB08767.1	0.418797	1.35925	0	0	0	0	0	0	0	0	0.192341
IGDB08767	IGDB08767.2	1.50602	0.890042	0.114267	1.26108	0.676246	1.65752	1.12523	3.48515	3.12348	3.41793	1.35502
IGDB08767	IGDB08767.3	14.0431	9.15804	1.07209	0.500524	1.5441	4.39136	7.06558	6.72102	5.99537	2.90967	1.78108
IGDB08767	IGDB08767.4	0.426436	0	0	0.0223935	0.0298105	0.0463425	0.138865	0.251758	0.136576	0.106423	0.170766
IGDB08831	IGDB08831.1	0.0522765	0.0325385	0.002309	0.007072	0.0325085	0.411683	1.72651	3.67756	2.7648	1.47238	0.195644
IGDB08831	IGDB08831.2	0	0	0	0	0	0.264284	0.244007	0.347116	0.119661	0.221077	0
IGDB08831	IGDB08831.3	0	0.221425	0.0685405	0.337322	0.0566095	0	0	0	0	0	0
IGDB08831	IGDB08831.4	0	0	0	0	0	0.0088755	0	0.0213115	0.013332	0	0
IGDB08831	IGDB08831.5	0.012639	0	0.0096585	0.677193	0.620745	1.97432	1.92434	2.49484	2.49617	2.43134	0.613192
IGDB08831	IGDB08831.6	0	0	0.008505	0	0.764566	1.05e-05	0.639069	0.136004	0.112546	0.384593	0.679074
IGDB08831	IGDB08831.7	0	0	0.16536	0	0	0	0.339701	0.477847	0.226908	0.252963	0.28402
IGDB08831	IGDB08831.8	0.6731	0	0	0	0	1.85e-05	0	0	0	0	0
IGDB08833	IGDB08833.1	0	0	0.103589	0.721542	1.88447	2.1362	3.31504	3.4497	3.78834	3.61575	3.5262
IGDB08833	IGDB08833.2	0.0372865	0.347807	0.0602575	0.264192	0.617613	0.59229	0.580855	0.818041	0.626745	1.5745	0.888523
IGDB08838	IGDB08838.1	0	0.059984	0.0106485	0.225277	0.417787	1.02079	1.19826	2.59621	2.38759	1.26973	1.28993
IGDB08838	IGDB08838.2	0	0	0.0351945	0.272103	0.107428	2.53317	6.58914	10.9928	9.3007	6.08818	2.69394
IGDB08854	IGDB08854.1	4.2502	4.73209	4.61995	52.3467	98.2112	44.5886	2.49409	1.87724	7.79499	0.826554	1.65672
IGDB08854	IGDB08854.2	105.807	97.2681	85.8493	30.0984	6.6563	47.3522	68.6599	41.2649	15.146	23.0514	32.7582
IGDB08868	IGDB08868.1	0.012782	0.0750885	0.0401295	0.189745	0.518015	0.750391	1.6233	2.94885	0.680677	0.511215	1.33807
IGDB08868	IGDB08868.2	0	0	0	0.0786735	0.097662	0.4659	1.18388	1.95869	0.698221	0.717307	1.74942
IGDB08868	IGDB08868.3	0.149322	0	0.0913545	0.27011	0.817235	5.11342	2.84511	5.42669	5.0375	4.95531	2.73981
IGDB08868	IGDB08868.4	0	0.209541	0.122269	0.825798	2.59368	0.867992	2.93514	0.121304	3.31399	3.13337	3.37628
IGDB08868	IGDB08868.5	0	0.021939	0.0514655	0.572871	0.0398355	0.132545	0.0294825	1.11059	0	0.0700625	0
IGDB08882	IGDB08882.1	19.0139	10.8222	14.1743	17.3037	11.3367	10.8191	10.1623	7.1301	1.77392	3.24083	3.60986
IGDB08882	IGDB08882.2	1.49962	0	13.2779	6.2767	17.225	14.4385	5.9533	3.26398	3.1385	0	1.07557
IGDB08882	IGDB08882.3	0.375729	0.530794	1.64575	2.22403	2.27366	1.51474	1.62779	1.01036	0.256644	0.282944	0.183256
IGDB08897	IGDB08897.1	0.348011	0.334884	1.993	0.0042715	0	0.068974	0.264566	0.166483	0.186955	0.236932	1.04325
IGDB08897	IGDB08897.2	0.053778	0.0325385	0.0131905	0.026149	0	0.0258105	0	0.300007	8.34663	22.0654	16.9559
IGDB08917	IGDB08917.1	0.21828	0.138047	0.979409	0.818321	9.89109	28.6282	12.8063	3.64422	1.34275	0.816648	0.448557
IGDB08917	IGDB08917.2	0	0.060283	3.77664	0.566863	0.186486	0.158948	0.118646	0.145466	0.336823	0.303785	0.162141
IGDB08919	IGDB08919.1	0	0	0	0	0.0365745	0	0.311443	1.71518	3.26105	1.80977	1.16488
IGDB08919	IGDB08919.2	0.033418	0.51674	0.543057	0.601676	0	0.733137	1.1783	2.03726	2.7239	1.24519	1.19481
IGDB08919	IGDB08919.3	0	0	2.54188	1.94587	1.64475	0.491281	0.355427	1.10775	2.36716	2.35405	1.35285
IGDB08919	IGDB08919.4	0	0	0	0	0.0068035	0	4.8e-05	0.0082235	0.0078885	0	0.0014855
IGDB08919	IGDB08919.5	0	0	1.28014	0.93248	0.058316	0.604969	0.242487	1.42557	2.32031	1.85861	0.543292
IGDB08920	IGDB08920.1	0.0215675	1.21636	0	0.0515555	1.29282	5.48612	2.44027	0.796855	0.288343	0.643888	0.275834
IGDB08920	IGDB08920.2	0	7.73877	0	0.283166	12.0034	28.0652	18.7024	5.88062	1.77268	0.882928	0
IGDB08921	IGDB08921.1	0.231033	10.3038	0	0	0.219225	6.01939	8.6462	2.57417	0.962302	0.517035	0.229954
IGDB08921	IGDB08921.2	0.225421	2.05653	0.0192715	0	0.180392	0.859793	1.35911	0.573334	0.123203	0.256427	0.0487725
IGDB08935	IGDB08935.1	0	0.025316	0.0221725	0.127126	0	0.0091425	0.00736	0.0515935	1.79135	0.501827	1.03545
IGDB08935	IGDB08935.2	0	0	0	0	0.514804	1.61766	3.06014	10.8416	13.2265	12.2225	9.36125
IGDB08942	IGDB08942.1	0	0	0	0.01262	0.04811	0.0497725	0.122099	1.73212	3.12361	2.32376	0.559316
IGDB08942	IGDB08942.2	0.316682	0.311839	0.0172625	0	0.001069	0.002722	0	0.571365	1.40131	1.66599	0.526111
IGDB08942	IGDB08942.3	0	0	0	0	0	0.0238875	0.0296785	0.58585	1.41265	2.07005	0.487104
IGDB08942	IGDB08942.4	0	0	0	0	1.12785	1.25083	0.768072	1.97163	1.17742	1.13087	1.00348
IGDB08942	IGDB08942.5	0	0	3.61286	2.70448	1.77608	3.05876	4.80167	4.68354	5.41692	5.99723	3.99797
IGDB08963	IGDB08963.1	3.46326	0.652266	0.842511	0.479672	0.082073	0.69987	1.48591	3.8157	4.54887	3.90989	1.25035
IGDB08963	IGDB08963.2	1.70729	2.0017	0	0	0	0.302393	2.12766	3.13765	4.74472	3.17321	0.918573
IGDB08973	IGDB08973.1	0.010121	0.008955	0.123215	0.328023	1.412	0.401628	0.526707	1.93766	0.560587	0.845531	0.406562
IGDB08973	IGDB08973.2	0	0	0.0537515	5.85853	15.5574	9.42777	8.4337	6.16608	11.6397	9.42641	5.5997
IGDB08980	IGDB08980.1	0.101722	0.156977	0	2.25068	6.74979	11.6152	14.001	18.8078	17.9459	12.4429	3.30812
IGDB08980	IGDB08980.2	0	0	1.78107	2.32751	1.70938	0.944846	0.721594	0.943147	1.44091	2.28709	6.68214
IGDB08980	IGDB08980.3	0	0	0	0	0	0	0	0	0.012241	0.0138245	0
IGDB08987	IGDB08987.1	0	0.041498	0.086336	0.283382	1.9061	0.316161	0.440552	0.333069	0.38954	0.292292	0.365977
IGDB08987	IGDB08987.2	0	0	0.062824	4.51499	4.29373	2.77279	1.76012	0.815731	0.581	0.328921	0.165947
IGDB09004	IGDB09004.1	0	0	0	0	0.299494	1.01994	0.393326	0.631185	0	0.897899	0.764499
IGDB09004	IGDB09004.2	0.0171695	0.054264	0.13242	0.218501	0.892331	0.0526295	0.615873	0.324454	1.03455	0.695713	0.479175
IGDB09060	IGDB09060.1	0	0.111241	0.031046	0	0.14051	1.01852	1.45236	1.77929	0.885676	0.944472	0.159378
IGDB09060	IGDB09060.2	0	0.018226	0.141576	0	1.01424	5.34549	5.08507	3.49264	4.70108	3.87799	1.83358
IGDB09073	IGDB09073.1	0	0	0.026267	0.0753895	0.10733	0.143304	0.146327	0.147917	0.113477	0.343022	0.377014
IGDB09073	IGDB09073.10	0.191834	0.0942735	0	0.595344	1.85446	4.74913	7.33097	10.1807	8.99954	16.6578	19.7506
IGDB09073	IGDB09073.2	0	0	0	0	0	0	0	0	0	0	0
IGDB09073	IGDB09073.3	0	0	0	0	0	0.022692	0.00719	0.0279005	0.043402	0.0712205	0.0940235
IGDB09073	IGDB09073.4	0	0	0	0	0	0	0	0	0.0017145	0.0009625	0.007011
IGDB09073	IGDB09073.5	0	0	0	0	0	0	0	0	0	0	0
IGDB09073	IGDB09073.6	0	0	0	0	0	0	0	0	0	0	0
IGDB09073	IGDB09073.7	0	0	0	0	0	0	0	0	0	0	0.013642
IGDB09073	IGDB09073.8	0	0	0.0088535	0	0	0	0	0	0	0	0
IGDB09073	IGDB09073.9	0	0	0.0940545	2.20211	8.60285	7.56933	10.8075	12.2497	10.6122	11.0691	13.4952
IGDB09093	IGDB09093.1	0.436599	0.909443	1.13117	1.71345	0.89894	0.416614	0.185253	0.435879	0.698901	0.580901	0.272284
IGDB09093	IGDB09093.2	0.28503	3.32958	2.93282	11.8185	4.41772	2.36376	4.32314	5.94626	5.44765	4.81263	1.0756
IGDB09100	IGDB09100.1	0.171909	0.235076	0.0753995	0.340587	0.952454	0.28441	0.368252	1.42415	0.153296	1.01324	0.759062
IGDB09100	IGDB09100.2	0	0.0202625	0	0.226843	0.776021	1.97062	2.83825	3.83495	2.47312	0.944519	0.082063
IGDB09100	IGDB09100.3	0	0	0	0.221343	0	0	0	0.093857	0	0	0
IGDB09133	IGDB09133.1	0	1.73446	5.30797	3.62315	4.81518	5.20163	8.36435	6.9402	3.32529	3.6924	2.48633
IGDB09133	IGDB09133.2	0.150356	0.082733	0.439897	0.068501	0.08307	2.08968	1.95982	1.19538	1.28867	0.340488	0.130977
IGDB09133	IGDB09133.3	0	0.0276155	0	0.0304945	0.0200745	0.215229	0.0499505	0.0641915	0.0136855	0	0.0285555
IGDB09143	IGDB09143.1	0	0	0.017622	0	0	0	0	0.0290305	0	0.012137	0
IGDB09143	IGDB09143.2	1.86083	2.45045	0.499222	0.351384	0.239911	0.139662	0.295145	0.106234	0.1305	0.068553	0.153945
IGDB09143	IGDB09143.3	54.806	71.752	19.8497	13.9509	2.38623	0.504977	0.045377	0	0.0451595	0.307271	3.57694
IGDB09181	IGDB09181.1	194.852	165.757	17.8623	14.4984	10.4015	33.4342	29.6489	19.5395	12.4714	13.8055	24.3963
IGDB09181	IGDB09181.2	11.1093	14.7457	3.24895	1.1836	2.42193	10.073	14.8677	7.88582	7.30475	5.45284	5.76874
IGDB09181	IGDB09181.3	145.392	136.427	11.1087	122.019	90.4631	11.9234	7.17317	8.40748	5.13914	7.60842	15.4394
IGDB09228	IGDB09228.1	1.21571	1.41418	1.44664	1.37377	1.24429	0.19852	0.515524	0.452936	0.15882	0.70973	0.352897
IGDB09228	IGDB09228.2	1.31612	0.565298	0.605201	0.944564	1.85242	7.28243	9.25362	11.2925	10.7709	6.75647	5.23914
IGDB09229	IGDB09229.1	0.275097	0	0.25497	0.821857	3.82989	4.32017	4.95516	8.26303	16.9553	21.762	23.9258
IGDB09229	IGDB09229.2	0.369116	0.252339	0.238513	0.154131	0.512435	0.505883	0.205471	0.030194	4.81408	0.035321	0.911204
IGDB09229	IGDB09229.3	0.011031	0	0	0	0	0	0.004954	0.016375	0.0091135	0.011317	0
IGDB09264	IGDB09264.1	0	0.230345	0.240487	0.762629	0.061461	0.711275	0.580087	0.39717	1.9924	1.61696	1.87128
IGDB09264	IGDB09264.2	0	0	0.545104	0	2.15075	3.2262	3.16172	5.11682	10.5983	9.47402	13.4058
IGDB09265	IGDB09265.1	0	0	0.665453	0.716626	0.566759	0	0.202609	0.667064	0	1.82463	0.637841
IGDB09265	IGDB09265.2	0.28598	0.164212	1.31466	0.830515	0.263221	0.603457	0.674021	1.57093	3.01582	1.19189	0.311863
IGDB09274	IGDB09274.1	0.197091	0	0	0	0.056938	0.129999	0.148595	1.30629	3.05513	1.224	0.777633
IGDB09274	IGDB09274.2	0.385294	0.541385	0	0	0.017426	0.028104	0.745568	2.48238	5.50272	3.87077	0.99888
IGDB09292	IGDB09292.1	0	3.0263	0.353368	0.160107	0.4175	0.182303	0.290855	0.0880205	0.336911	0.929589	0.493729
IGDB09292	IGDB09292.2	11.0353	8.12328	0.141457	0.318735	0.035855	0.398701	1.71448	6.38976	10.856	6.75562	1.61104
IGDB09350	IGDB09350.1	1.05573	0.307254	0.254288	0.146474	0.270635	0.489524	0.186743	1.33923	1.15883	0.423067	0.007483
IGDB09350	IGDB09350.2	0	0.821036	0	0	0	0.243312	1.5028	1.79571	2.12787	1.70474	0.655462
IGDB09350	IGDB09350.3	4.06137	1.57917	0	0	0	0	0	0	0	0.127487	0
IGDB09388	IGDB09388.1	0.118575	0.391949	0.269528	1.35191	1.24279	4.09185	6.39605	12.6316	9.19071	7.24581	2.72482
IGDB09388	IGDB09388.2	0	0	0	0.090743	0.149111	0.290126	0.284296	0.391888	0.25991	0.535681	0.084011
IGDB09388	IGDB09388.3	0	0.113834	0.540971	0.738926	1.26567	2.06318	3.93258	3.3633	4.64106	4.7605	2.86297
IGDB09429	IGDB09429.1	0.10887	0.249559	0.537284	0.761973	1.20186	0.3533	0.438717	0.790749	0.245446	0.336065	0.408145
IGDB09429	IGDB09429.2	0.0197215	0.957863	3.00348	5.06956	5.00176	3.85387	7.1636	6.29103	3.31382	4.85218	3.87583
IGDB09459	IGDB09459.1	0	0.062429	0.216606	0	0.187242	0	0.195122	0.413865	1.47069	0	0
IGDB09459	IGDB09459.2	0.01735	0.129802	0.068943	0.153353	0.04855	0.243679	0.27212	0.070121	3.85408	4.29213	6.37544
IGDB09485	IGDB09485.1	0.567044	0.611635	0.315414	0.166451	0.228199	0.43987	0.011038	0.698932	1.50441	1.50732	0.287029
IGDB09485	IGDB09485.2	0	0	0	0	0.028171	0.0776025	0	0.551416	1.07082	1.15817	0.262678
IGDB09485	IGDB09485.3	0	0	0	0	0	0.018005	2.16494	2.94831	4.07734	1.9777	1.61559
IGDB09485	IGDB09485.4	0.830744	0	0.675083	0.0259045	0.0993005	1.57015	2.08559	3.33923	1.64746	1.35093	0.152401
IGDB09490	IGDB09490.1	1.06034	0.883296	2.85937	0.597431	0.189978	0.115268	0.131489	0.615648	1.10193	0.510825	0.380962
IGDB09490	IGDB09490.2	2.35193	2.59143	0.135805	0	0	0	0.062215	0	0.0014175	0	0.439762
IGDB09491	IGDB09491.1	5.769	9.34668	0.565819	21.4541	23.4294	17.7486	12.6377	9.79235	8.97413	8.21559	4.02622
IGDB09491	IGDB09491.2	0	4.98697	79.1738	10.1812	8.35331	0	3.26304	4.5682	0	0	9.2205
IGDB09530	IGDB09530.1	0	0.0249835	0.020291	0.309181	0.441765	2.42143	4.4937	4.85461	2.30778	1.42975	0.320982
IGDB09530	IGDB09530.2	0	0	0	0.0041675	0	1.54799	0.172612	0.932007	0.321611	0	0
IGDB09530	IGDB09530.3	0	0	0	0.124302	0.735985	7.76309	15.8368	25.2529	7.67785	10.5458	1.61969
IGDB09530	IGDB09530.4	0	0	0	0	0.0071945	0.0238365	0.0211445	0.0412165	0.111134	0.021612	0.0094435
IGDB09544	IGDB09544.1	0	0	17.6496	2.25294	3.47304	5.18967	3.46376	5.31036	1.62957	6.43404	4.42849
IGDB09544	IGDB09544.2	0	2.47206	88.9576	30.4967	33.922	23.2183	26.6546	30.7672	24.2166	21.4655	24.7963
IGDB09544	IGDB09544.3	104.733	97.6605	17.7465	1.88143	0.0064355	0	2.597	0	1.67445	0	4.41071
IGDB09555	IGDB09555.1	1.17343	2.96947	0	0	0	0	0	0	0	0	0
IGDB09555	IGDB09555.2	1.3155	0	0.334759	0	0	0	0	0	0.0196525	0.0409865	0.0868885
IGDB09570	IGDB09570.1	0	0.005392	0	0	0	0	0.611823	0.989539	2.33086	0.536775	0.900865
IGDB09570	IGDB09570.2	0.255234	0.180354	0.155894	0.0660765	0.307811	0.252711	0.925769	3.29436	3.73646	3.85617	0.614127
IGDB09570	IGDB09570.3	0	0	0	0	0	1.15708	0.371654	0.301411	0.489207	0	0.168215
IGDB09617	IGDB09617.1	0.190053	0	0.046116	0	0	0.0325065	0	0.035168	0	0.051466	0.35151
IGDB09617	IGDB09617.2	0	0	0.0678615	0.0376825	0.015245	0.0167325	0	0	0.0830845	0.0769435	0.2764
IGDB09617	IGDB09617.3	0.051054	0	0	0.115887	0.0773185	0.124857	0.033388	0.10984	0.161736	0.122264	2.4878
IGDB09617	IGDB09617.4	0	0.001676	0.029004	0.0137355	0.0414635	0	0.082218	0.079352	0.003181	0.0727385	2.22166
IGDB09617	IGDB09617.5	0	0	0.0218925	0.0703525	0	0	0	0.0472155	0	0	0.930737
IGDB09617	IGDB09617.6	0	0	0	0.226399	0	0	0	0.0137705	0.197852	0.213637	1.3189
IGDB09633	IGDB09633.1	0.130384	0.177534	0.791409	2.1133	0.578991	0.373406	0.823214	0.896371	1.13788	1.72498	1.56781
IGDB09633	IGDB09633.2	0	0.264833	0.005751	0.013875	0	0.0084825	0.0203535	0.234819	3.03314	3.33739	1.23815
IGDB09637	IGDB09637.1	20.0776	7.74976	0.560518	5.20861	2.706	4.37114	11.1512	10.2629	6.35357	6.96205	3.5159
IGDB09637	IGDB09637.2	3.33694	6.97936	3.54954	4.26737	14.3408	13.0472	12.8224	12.202	6.63254	6.65642	3.80305
IGDB09637	IGDB09637.3	15.1978	0.872904	7.52485	1.61922	0.294223	4.32258	7.13213	0.258265	3.56122	4.19079	3.71094
IGDB09669	IGDB09669.1	0.20712	0.15572	0.036636	0.049987	0.094338	0.339561	0.553272	0.596596	0.981686	1.32437	0.848572
IGDB09669	IGDB09669.2	0.312414	0.317678	0.095	0.0230395	0.560582	1.87423	3.65227	3.35028	3.03952	5.25591	3.79971
IGDB09694	IGDB09694.1	0.0382	0.12541	0	0.104581	0.294215	0.970162	0.934304	0.619025	0.560954	1.24296	1.30837
IGDB09694	IGDB09694.2	0.181587	0.074112	0	0	0.775485	0.730303	1.58905	1.27301	1.07213	2.54125	5.55156
IGDB09694	IGDB09694.3	0.747182	0.294158	0	0	0.290664	0	0	1.09478	0.671159	3.76487	0
IGDB09694	IGDB09694.4	0	0	0	0	0	0	0	0	0	0	0
IGDB09721	IGDB09721.1	0	0.156916	0.0165735	0.039849	0.0122795	0.573649	1.51861	4.04141	1.87825	3.20711	1.02207
IGDB09721	IGDB09721.2	0	0	4.38805	0.247713	0.387292	0.921755	2.67444	4.88213	5.28471	2.46043	0.269172
IGDB09721	IGDB09721.3	0	0	0.0533925	0	0	0.162294	0.0168895	0.216947	0	0.0250145	0
IGDB09721	IGDB09721.4	0	0	0	0	0	0.005034	0.0516385	0.101875	0.110463	0.034842	0
IGDB09729	IGDB09729.1	0	0	0	0	0	0.143801	0	0	0	0	0
IGDB09729	IGDB09729.2	0	0	0.034498	0.204751	0.351722	0	0.0013905	0.0016865	0.018554	0.005183	0.283043
IGDB09729	IGDB09729.3	0	0	0	0.078722	1.9233	0.627456	3.05641	8.94132	8.96721	5.70858	5.41719
IGDB09729	IGDB09729.4	0	0	0	0.388757	0	3.99267	3.87765	9.4168	2.55886	4.261	1.13865
IGDB09729	IGDB09729.5	0	0	0	0.150127	0.0354095	2.20801	6.59177	6.78379	9.61525	3.40095	1.84165
IGDB09729	IGDB09729.6	0	0	0	0	0	0	0	0	0.0012825	0	0
IGDB09752	IGDB09752.1	0.383141	0.128307	0.737561	0.553365	0.384404	0.650397	0.634635	1.90881	0.415056	0.620412	0.863318
IGDB09752	IGDB09752.2	0.684005	2.07578	0.721047	1.27431	0.691765	0.616219	0.746672	0.152689	4.52559	2.84783	1.26587
IGDB09798	IGDB09798.1	0.157047	1.18626	0.042119	0.141628	2.70191	0.235286	4.03521	2.75619	3.15592	0.484287	0.0686065
IGDB09798	IGDB09798.2	0	1.4109	0	0.0421605	1.34338	0.168808	0	2.31644	2.87967	3.28112	1.63238
IGDB09798	IGDB09798.3	0	0	0	0.310623	0.474647	4.85115	0.642268	0.661979	0	0	0
IGDB09798	IGDB09798.4	0	0.072386	3.47059	9.31551	12.3898	51.4127	73.8927	70.3811	27.2387	26.5943	19.2356
IGDB09817	IGDB09817.1	0.0461955	0	0.0465205	0	0	0	0	0	0.243216	0	0
IGDB09817	IGDB09817.2	0	0.0539505	0	0.0390405	3.84487	4.16523	1.37022	14.2125	39.2616	35.6939	10.512
IGDB09817	IGDB09817.3	0.09392	0.434583	0.0237315	0.252738	2.47436	2.82969	6.78465	8.63651	22.969	28.7714	12.8172
IGDB09817	IGDB09817.4	0.0150435	0.0051575	0.0967265	0.169035	1.35573	0.358384	1.69825	0.835507	2.37157	2.66239	1.80335
IGDB09842	IGDB09842.1	0.178762	2.23653	0.672342	0.335828	0.469037	6.86265	18.6908	18.7763	26.3695	17.4269	4.68791
IGDB09842	IGDB09842.2	0	3.89183	1.15041	1.55462	5.15825	384.077	601.852	1262.31	1197	1340.84	393.617
IGDB09918	IGDB09918.1	0.0470365	0.03378	0	0.069075	0.510776	1.60434	14.0925	9.43271	2.58288	2.57229	0.386616
IGDB09918	IGDB09918.2	0	0	0	0	1.83586	14.0194	75.6278	51.6831	17.5432	10.802	1.4335
IGDB09921	IGDB09921.1	0	0	0.0139485	0	0.0655355	0.450119	0.805303	6.55135	5.9224	3.80576	1.37931
IGDB09921	IGDB09921.2	0	0	0.0476105	0.104727	0.293932	0.433051	0.920829	4.46652	3.62978	2.61376	1.40954
IGDB09982	IGDB09982.1	0	0	0.231289	0.0385135	0.019523	0	0.09685	0.779032	1.46809	1.20957	1.15751
IGDB09982	IGDB09982.2	0	0	0	0	0	0.048608	0.055651	0.819039	1.74645	0.89007	0.760393
IGDB10009	IGDB10009.1	0	0	0	0	0	0.590142	0.572746	0.504259	0.352346	0	0.03404
IGDB10009	IGDB10009.2	0	0	0	0	0	0	0	0	0	0	0.0537605
IGDB10009	IGDB10009.3	0	0.42045	2.42116	1.23503	0.849731	0.932786	1.60334	0.995782	0.712199	2.07336	1.06501
IGDB10009	IGDB10009.4	0	0	0	0	0	0	0	0	0	0	0
IGDB10009	IGDB10009.5	0	0.0740625	4.86149	0.744319	0.809193	0.544809	0.531614	0.184467	0.602695	1.55761	0.50804
IGDB10017	IGDB10017.1	0.0120205	0.875349	0.907776	0.400481	3.79283	24.7139	37.1109	14.3901	3.13639	3.63476	1.8707
IGDB10017	IGDB10017.2	0	1.28618	0	3.14787	3.95733	11.0001	3.48247	3.69437	4.90997	3.75439	4.57708
IGDB10141	IGDB10141.1	0	0.0073615	0.079483	0.199207	0.784875	0	0	0.437368	2.44873	1.07326	0.982739
IGDB10141	IGDB10141.2	0.0159135	0.0618965	0	0.883062	4.75717	5.05664	6.60188	10.0847	11.009	12.2997	27.1374
IGDB10141	IGDB10141.3	0.323808	0.299395	0	0.320964	1.28914	1.71701	2.39119	3.2966	1.68207	2.07455	5.12685
IGDB10143	IGDB10143.1	4.92711	2.38174	0	0.000531	0.004556	0.155849	0.254646	0.371737	0.0553185	0.023563	0.419112
IGDB10143	IGDB10143.2	0	0.0126	0.0142995	0.118915	0.136139	0.208671	0.558002	2.50363	2.78528	2.0305	0.148954
IGDB10146	IGDB10146.1	0.0185905	0.188408	3.53178	7.63116	1.44245	0.10326	0.12781	0.073533	0.131218	0.016763	0.154067
IGDB10146	IGDB10146.2	0	0.0364975	2.19963	7.63317	1.60115	0.0518675	0.0912935	0.061171	0.022719	0.0475415	0.058438
IGDB10146	IGDB10146.3	0	0.589584	36.1263	103.608	24.6062	0.542077	0.26677	0.347399	0.402815	0.255187	1.67508
IGDB10159	IGDB10159.1	0.009007	7.2918	90.1586	85.705	36.8514	16.7807	19.3667	7.25652	3.12301	1.61575	0.995958
IGDB10159	IGDB10159.2	95.0115	114.148	7.01454	13.2539	5.58132	9.35197	1.34675	2.88923	0.42307	0	0
IGDB10236	IGDB10236.1	0.0893815	0.0098155	0.0014075	0.004367	0	0.0145345	0.010489	0.0062945	0.078619	0.313181	0.416295
IGDB10236	IGDB10236.2	7.8089	7.94334	0.006019	0	0.145639	0.13082	0	0.393296	0.680983	0.547848	4.99148
IGDB10236	IGDB10236.3	0.140764	0.31624	0.997969	0.140339	0	0	0.223674	0	0	1.32201	1.13592
IGDB10236	IGDB10236.4	0	0	0	0	0	0	0	0	0	0	0
IGDB10305	IGDB10305.1	3.2544	2.35342	4.45093	5.75685	8.20018	6.96925	9.49386	14.3994	7.63447	6.618	7.49785
IGDB10305	IGDB10305.2	8.0659	3.66386	4.1785	7.03098	6.48468	6.45938	7.0629	2.24027	2.8213	3.87206	2.73717
IGDB10313	IGDB10313.1	19.928	15.1382	8.72297	3.27216	4.94445	2.00737	6.10548	9.16277	11.2741	6.98729	4.70658
IGDB10313	IGDB10313.2	13.9555	24.4607	0.017724	1.12955	2.47614	4.62395	0.780112	0.220413	0.0040425	1.66932	3.28614
IGDB10313	IGDB10313.3	0.601392	0.998668	0.036118	0.028945	0.161252	0.149008	0.023963	0.0563785	0.0435575	0.127698	0.0559665
IGDB10315	IGDB10315.1	0.61066	1.10572	3.57566	4.11187	4.68532	4.27901	3.82855	2.98622	4.46196	3.27279	3.10376
IGDB10315	IGDB10315.2	0.681531	0.919369	1.42828	2.03342	1.66036	1.45261	2.45902	4.51581	3.16573	3.26477	1.40195
IGDB10338	IGDB10338.1	2.57037	3.12146	1.60496	1.34245	0.930275	0.904646	1.01301	0.551728	0.749656	0.485932	0.189393
IGDB10338	IGDB10338.2	0.0105445	0.022367	0.022239	0.0075805	0	0.006257	0	0	0.013234	0	0
IGDB10338	IGDB10338.3	0.212827	1.67714	11.3792	1.69911	1.137	0.889444	0.689119	1.41841	0.492601	0.227765	0.658356
IGDB10343	IGDB10343.1	0	0.118249	2.00885	2.6926	0.423287	1.08441	0.312789	0	0.390253	0.424291	0
IGDB10343	IGDB10343.2	0.346741	2.90204	5.92911	2.17134	1.66623	0.89952	0.960467	2.3201	0.754431	2.92712	2.49391
IGDB10343	IGDB10343.3	0	7.12064	9.60464	0.427019	2.07741	1.57534	2.10318	1.15174	0.92654	2.40633	0.643453
IGDB10364	IGDB10364.1	36.087	17.1423	25.2087	71.2622	60.4853	54.053	58.5251	50.5577	12.9581	22.286	7.47796
IGDB10364	IGDB10364.2	6.17116	0	0.215416	0.299151	0.112897	0.028063	0	0.204276	0	0.91708	0.101895
IGDB10364	IGDB10364.3	0	22.5123	19.7452	5.64795	20.6118	83.2708	30.6794	5.88387	28.1154	3.42216	7.68279
IGDB10364	IGDB10364.4	7.56605	0	0	6.53725	0.371757	0	1.58425	0	0	0.985529	0
IGDB10364	IGDB10364.5	0	0	0	0	69.549	14.6298	0	0	0	0	2.03816
IGDB10364	IGDB10364.6	0.038071	0.147634	0.508231	0.985905	2.35044	1.69928	1.78623	1.14984	0.862935	0.457763	0.315655
IGDB10369	IGDB10369.1	1.48633	4.46486	9.20587	4.34524	2.05562	1.44493	1.10039	0.401621	0.658497	0.510127	0.685871
IGDB10369	IGDB10369.2	0.56027	15.6104	24.2806	4.32417	2.44943	1.15054	1.26378	1.09631	0.663296	0.413712	0.05877
IGDB10390	IGDB10390.1	0.301739	12.2099	13.569	3.0413	2.1502	2.01152	1.63097	0.781411	0.181525	0.0810835	0.0199785
IGDB10390	IGDB10390.2	0.120428	7.33369	26.6342	11.3285	3.19638	1.27101	1.03092	0.899764	0.593909	0.44225	0.469718
IGDB10390	IGDB10390.3	0.0723265	0.165115	0.77626	0.278683	0.237369	0.149529	0.063918	0.29983	0.535876	0.168888	0.124279
IGDB10396	IGDB10396.1	0.0871815	0.497673	6.28396	0.278	0.0374855	0.0038815	0.0378325	0.117672	0.004041	0.258759	0.184731
IGDB10396	IGDB10396.2	1.22817	8.1158	8.51298	2.85525	0.692506	0.258248	0.112119	0.039119	0.245914	0.422357	0.241878
IGDB10403	IGDB10403.1	0.192137	1.67557	1.65708	0.357864	0.208489	0.244661	0.214821	0.17396	0.249039	0.575561	0.402919
IGDB10403	IGDB10403.2	0.768023	1.36044	2.56174	0.78403	0.562968	0.254451	0.289318	0.141612	0.0175645	0.14897	0.152695
IGDB10419	IGDB10419.1	0	0.0208545	0	0.412689	0.658528	0.26787	0.506981	1.41146	3.1478	3.12369	11.5231
IGDB10419	IGDB10419.2	0	0	0.106335	0	0	0.750606	1.99478	5.67506	7.78872	5.6671	2.15435
IGDB10419	IGDB10419.3	0	0.0637075	0.211003	0.33473	0	0.601521	0.563569	0.011489	0	0	0.779905
IGDB10451	IGDB10451.1	0.212257	4.62222	5.60044	2.4908	2.61712	0.900609	0.713289	0.302312	0	0.143539	0.225332
IGDB10451	IGDB10451.2	0.15891	25.9449	35.1207	11.5223	3.69878	0.905585	0.415098	0	0.202566	0.357883	0.062825
IGDB10467	IGDB10467.1	0.0776535	0.471668	0.0517235	0.348145	0.076407	0.044028	0.0495725	0.01396	0.508717	1.47604	0.467031
IGDB10467	IGDB10467.2	0	0	1.85577	0	0.0044775	0	0	0	0.891092	45.6875	9.37641
IGDB10478	IGDB10478.1	0.172748	0.373557	8.28881	13.6952	9.6843	14.4435	21.5531	15.6703	11.259	8.00282	4.63288
IGDB10478	IGDB10478.2	0.267267	1.53503	0.393527	1.42743	1.515	1.81518	1.94057	1.91377	1.16651	1.39713	4.73735
IGDB10478	IGDB10478.3	0.433614	0.387655	25.8435	42.8838	49.8499	59.0007	59.2356	63.0152	34.8145	24.0739	7.82165
IGDB10483	IGDB10483.1	0.463066	0.126103	0.155683	0.483806	0.161323	0.192637	0.295013	0.400933	1.65712	1.596	3.22077
IGDB10483	IGDB10483.2	0.012561	0.614039	1.9203	2.67802	2.77551	1.97031	3.26061	3.77475	6.26933	7.57892	18.2764
IGDB10532	IGDB10532.1	0.118701	0.815567	3.13893	1.62061	1.78333	1.69559	1.95801	1.69492	1.49206	4.18455	1.80626
IGDB10532	IGDB10532.2	0	0.609431	3.1629	1.18177	0.734231	0.251449	0	0	0	0.510825	0.451618
IGDB10532	IGDB10532.3	0.271169	1.40169	2.9996	0.534721	0.804099	0.310329	1.15651	0.392199	0.404668	0.270723	0.128209
IGDB10538	IGDB10538.1	2.29199	1.66511	3.86396	0.792622	1.88558	1.23842	0.763181	1.36921	0.535512	0.476641	0.244789
IGDB10538	IGDB10538.2	1.05783	7.93921	14.7698	2.99267	0.70531	0.707086	1.17322	0.389292	0.39632	0.336833	0.382154
IGDB10552	IGDB10552.1	0	0	0.456949	0	0.172653	0.142524	0	0.148105	0.163054	0.203862	1.02894
IGDB10552	IGDB10552.2	0	0.123147	0.790182	2.31641	1.78627	1.42585	1.86547	3.03944	6.57368	1.45638	1.07678
IGDB10552	IGDB10552.3	0	0.00881	1.06864	1.80494	3.62561	2.91304	4.15427	9.12345	32.3497	12.7623	6.21497
IGDB10552	IGDB10552.4	0	0	0.0636175	0.657578	0.615552	0.337142	0.733668	1.96564	12.6813	3.66731	1.184
IGDB10555	IGDB10555.1	0	0.078765	0.667754	0.759161	0.278865	0.663142	0.586783	0.784297	5.11302	4.97076	6.03829
IGDB10555	IGDB10555.2	0	0	0.368806	1.10845	0.844782	0.503873	0.734271	1.44299	9.73373	5.81305	8.7701
IGDB10563	IGDB10563.1	2.78924	4.42621	12.2633	1.62101	6.2587	27.7545	41.2474	104.098	203.081	166.703	238.981
IGDB10563	IGDB10563.2	32.7326	46.1526	2.95992	9.47776	21.2663	22.9464	35.7676	55.5249	162.559	112.324	189.272
IGDB10563	IGDB10563.3	1.54595	2.36886	1.09174	0.901009	1.97497	4.76956	4.87127	6.44668	13.4642	14.6808	23.6743
IGDB10563	IGDB10563.4	4.23552	5.37605	2.49588	1.3885	4.65537	20.8489	34.9503	46.5365	143.691	129.992	180.134
IGDB10568	IGDB10568.1	37.2714	51.0445	29.5678	12.0997	21.8589	33.1735	26.9996	22.4178	25.7595	10.8498	11.7923
IGDB10568	IGDB10568.2	43.6698	63.5693	35.5583	25.3555	21.009	32.0606	30.8813	23.5304	9.62173	16.6878	11.4528
IGDB10591	IGDB10591.1	0.551562	6.87079	1.01807	1.83107	1.84153	1.58206	3.67778	0.393886	1.06278	0.608795	0.841761
IGDB10591	IGDB10591.2	1.2107	5.75197	18.1856	3.36574	2.98024	3.78726	0.69529	4.46225	1.40019	1.35022	0.297009
IGDB10595	IGDB10595.1	2.23779	6.07986	3.52064	2.55545	1.79336	0.492885	0.648124	0.395466	0.292178	0.83662	1.0201
IGDB10595	IGDB10595.2	0	0	0	0	0	0	0	0	0	0	0
IGDB10595	IGDB10595.3	6.87293	7.22399	10.4189	2.36406	0.425115	0.237557	0	0.065757	0.0379645	0.163854	0.133745
IGDB10599	IGDB10599.1	0	0.178081	14.1015	0.169408	0.133569	0.0375845	0	0.298974	0	0.564321	0
IGDB10599	IGDB10599.2	0.668207	15.2106	2.90902	6.7101	5.00067	4.67568	3.84662	2.97726	2.02636	3.72653	3.89224
IGDB10601	IGDB10601.1	0	0.409052	9.66754	9.01691	7.51134	5.95949	5.51955	5.85872	5.69835	7.07133	8.89918
IGDB10601	IGDB10601.2	0	0.708581	1.95054	0.676006	1.97808	0.553335	0.848298	0.815272	1.35879	2.16805	1.37629
IGDB10620	IGDB10620.1	0	0	0	0.411064	2.61335	10.0444	17.9263	56.7959	24.3392	21.1674	7.63747
IGDB10620	IGDB10620.2	0	0	0	0	40.5584	305.126	463.379	660.152	579.114	570.465	241.409
IGDB10645	IGDB10645.1	42.8388	125.727	2.15018	0.904045	58.9183	46.9672	0.359488	54.6923	21.4235	0.375647	0.110058
IGDB10645	IGDB10645.2	5.64028	0.422488	46.4824	38.0949	27.9685	20.2876	35.5818	2.28421	9.44307	12.7994	14.7024
IGDB10645	IGDB10645.3	43.3742	0.618022	101.181	52.6389	22.2182	21.0552	32.6249	0.203269	2.87995	15.0947	16.6418
IGDB10645	IGDB10645.4	6.53788	0.365733	9.70908	0.571634	0.381477	0.383012	1.34656	0	0	1.63756	3.32579
IGDB10646	IGDB10646.1	14.4956	0.873315	0.6872	0	0.515401	1.33178	3.8734	5.85464	7.46644	6.08089	2.41597
IGDB10646	IGDB10646.2	58.9662	38.2374	2.84409	2.95693	4.26563	5.15176	4.52611	3.41094	3.60002	2.6726	4.50344
IGDB10656	IGDB10656.1	0	0.267189	0.391757	0.215704	0.830257	0.38514	0.462199	1.55059	0.836094	1.07941	1.74775
IGDB10656	IGDB10656.2	0	0	0.327293	0.343757	0.226222	0.522999	0.332083	1.68421	2.62602	1.94095	0.462753
IGDB10656	IGDB10656.3	0	0	1.21637	0.265351	0	0.361901	0	0	0	1.03018	0
IGDB10659	IGDB10659.1	0	0.011501	0	0.470519	0	0	0.248256	41.2709	1.19617	10.9837	16.6654
IGDB10659	IGDB10659.2	0	0	0.285594	0.449019	2.33982	4.23683	12.7982	64.5506	117.874	102.69	10.059
IGDB10659	IGDB10659.3	0	0	0	0	0	0	0	0.213671	0	0	0
IGDB10661	IGDB10661.1	46.3753	16.7137	7.41893	21.159	4.83669	22.4641	7.20667	19.6683	20.0239	22.1818	8.1576
IGDB10661	IGDB10661.2	12.8698	23.0872	13.0323	3.02332	18.9638	2.56409	23.5508	10.2262	11.1044	10.0801	9.36275
IGDB10735	IGDB10735.1	0	0.176982	2.62804	0.564565	0.458238	2.48011	2.34944	2.62014	0.118609	0.967755	0.544536
IGDB10735	IGDB10735.2	0	0.0431825	1.13099	5.99898	8.94474	7.87542	12.7612	10.3734	9.90722	14.3624	11.0178
IGDB10735	IGDB10735.3	0	0	0	7.97483	14.3445	9.33903	11.3657	10.3762	7.45519	4.82673	4.55184
IGDB10735	IGDB10735.4	0	0	0.296071	26.7027	35.9789	33.9329	31.3326	33.2332	20.1273	10.9412	3.41341
IGDB10735	IGDB10735.5	0	0	0	0	0	0	0	0	0.864893	0	0
IGDB10735	IGDB10735.6	0	0	0	1.46793	0.928715	2.18183	5.61646	1.76907	1.14575	4.54508	0.147191
IGDB10755	IGDB10755.1	2.49047	1.48308	0.001775	0	0	0	0	0	0	0	0.613178
IGDB10755	IGDB10755.2	10.9718	6.75798	0.0736865	0.182922	0.232265	0	0.0002885	0.266701	0.501582	0.685002	4.34284
IGDB10755	IGDB10755.3	103.249	63.3742	1.76946	0.125381	0	0	0.108828	0	0	0	34.6576
IGDB10760	IGDB10760.1	0.893923	0.453322	0.554263	2.69454	2.84238	2.52185	2.35873	1.20223	1.47947	1.36175	2.04384
IGDB10760	IGDB10760.2	0.058836	0.0233045	0.0847965	0	0	0	0.0964115	0.42255	0.589858	0	0.07155
IGDB10760	IGDB10760.3	0	0	0	0.104941	0	0.0455255	0	0	0.434121	1.13923	0.249056
IGDB10760	IGDB10760.4	4.59105	2.48691	2.83333	1.71718	1.60244	1.87006	2.03082	3.8836	3.16776	1.94804	7.53955
IGDB10774	IGDB10774.1	752.542	0.064011	883.09	791.486	252.112	1483.36	376.978	1735.67	688.786	0.230034	178.055
IGDB10774	IGDB10774.2	1.08591	1.08577	0.549644	0.24386	0.578425	2.83263	6.90305	4.07168	0.605854	6.51303	0.0811405
IGDB10774	IGDB10774.3	189.177	61.7937	101.19	163.212	248.809	384.825	389.895	370.74	370.217	585.945	156.585
IGDB10774	IGDB10774.4	65.9617	39.1229	28.336	120.978	159.641	53.8582	111.046	706.506	232.695	169.76	24.8406
IGDB10857	IGDB10857.1	1.99124	10.5957	0	2.81105	1.06977	0.539504	0.354965	0.579332	0.485752	0.408483	5.04539
IGDB10857	IGDB10857.2	104.599	115.91	57.9111	15.8164	1.86776	0.210661	0.020185	0.105955	0.177997	0.0453445	181.721
IGDB10900	IGDB10900.1	0	0	0	0	8.85665	5.09299	4.37839	4.22692	2.65097	3.17786	1.26545
IGDB10900	IGDB10900.2	0.191878	0.241969	0.275514	1.87085	3.13949	0.15371	0.177546	0	0.324111	0.274936	2.59112
IGDB10914	IGDB10914.1	0.0887955	0.5696	2.56347	2.17798	7.44275	18.8419	18.3425	25.7857	25.6974	18.0933	11.5637
IGDB10914	IGDB10914.2	0	0.0599885	14.7898	14.2193	2.55537	1.1233	0.73107	1.62996	2.61747	2.47517	1.28075
IGDB10918	IGDB10918.1	10.0566	8.82908	0.434684	1.74164	1.65213	0.823667	1.59818	1.45525	3.62814	4.09508	3.71734
IGDB10918	IGDB10918.2	9.117	3.65414	1.51005	2.33653	1.85956	1.86324	1.00878	3.0697	2.1202	1.89485	1.47817
IGDB10937	IGDB10937.1	1.70899	1.89231	1.05603	1.27566	1.86442	21.4809	15.8022	0.513561	0.800673	0	1.07275
IGDB10937	IGDB10937.2	0	0	0	0	0	0	0.152687	0.527945	19.0084	1.41548	30.4554
IGDB10937	IGDB10937.3	0	0.30909	0.684646	0.080088	0.486857	0.593429	0.38325	0.579206	0.84387	2.77557	5.04047
IGDB10937	IGDB10937.4	0	0	0	0	0.018378	0.985495	0.354305	19.3087	3.65182	0.310725	0.768897
IGDB10937	IGDB10937.5	0	0	0	0	0	0	0	0	0	0	0
IGDB10937	IGDB10937.6	0.010243	0.021258	0.013092	0.014768	0.066649	0.0512275	1.42275	1.93564	23.7098	4.73572	3.66771
IGDB10937	IGDB10937.7	0	0	0	0.928669	2.15655	10.1018	34.4348	113.82	130.076	316.605	231.794
IGDB10937	IGDB10937.8	0	0	0	0	0	0	0	0	0	0	0
IGDB10937	IGDB10937.9	0	0	0	0	0	0	0	0	0	0	0
IGDB10942	IGDB10942.1	198.97	233.117	135.96	37.0902	140.883	233.334	92.7487	85.4735	139.299	38.0909	41.4583
IGDB10942	IGDB10942.2	0	12.4058	0	97.5167	0	0	49.4091	0	0	20.9497	9.9534
IGDB10942	IGDB10942.3	41.5438	10.2114	14.616	12.0018	31.6746	0.304637	23.0485	55.8966	0.139551	19.7083	16.1446
IGDB10945	IGDB10945.1	0	0	0.194696	0	0.033972	0	0	0	0	0	0
IGDB10945	IGDB10945.2	0	2.11079	2.2656	2.83404	0.821689	0.821526	1.09023	1.40796	0.276376	1.94667	9.20571
IGDB10945	IGDB10945.3	0	0	0	0	0	0	0	0	3.42922	0	0
IGDB10945	IGDB10945.4	0	0	0	0	0	0	0	0	0	0	0
IGDB10964	IGDB10964.1	0	0	0	0.043512	0.0065815	0.067237	0.943416	0.999869	3.03917	1.33302	0.101663
IGDB10964	IGDB10964.2	0	0	0	0	1.49748	3.40023	3.48494	1.56241	7.00314	7.26904	5.41292
IGDB10969	IGDB10969.1	0.37875	0.528664	1.2575	0.91495	0.536575	4.57772	9.35217	14.558	10.6215	6.30482	3.0653
IGDB10969	IGDB10969.2	0.793912	1.37846	2.48508	0.0875285	1.46622	0	0	0.291004	0	3.93362	0.333408
IGDB10973	IGDB10973.1	0.517874	2.50335	0.573539	0.701693	0.097833	0.140004	0.244137	0.136921	0.741	0.40821	1.98472
IGDB10973	IGDB10973.2	0.845557	0.536617	0	0.407381	0.0146195	0.009159	0	0.478828	0.882395	0.523825	1.00911
IGDB10973	IGDB10973.3	0.662648	0.52305	0.753629	0.02296	0.14666	0.091484	0.371123	0.491588	0.106849	0.26647	0.148794
IGDB10976	IGDB10976.1	3.09099	5.3277	37.7054	76.1181	80.961	54.1319	55.5344	63.5367	49.8975	55.186	48.4635
IGDB10976	IGDB10976.2	130.797	158.224	113.446	41.8132	17.7421	7.7015	4.91231	5.64665	5.06306	3.68492	11.2071
IGDB10984	IGDB10984.1	0	0	0	0	0.955917	0	2.44273	4.42889	13.8025	12.643	11.1321
IGDB10984	IGDB10984.2	0	0	0.067969	0.241533	0.805361	2.08595	0.422014	4.10087	0	0	0
IGDB10990	IGDB10990.1	0.905624	0.988174	1.14615	1.35297	0.06747	0.170171	0.0816935	0.584041	0.0010805	0.316043	0.191512
IGDB10990	IGDB10990.2	0.730545	0.725773	0.855946	0	1.85232	2.96465	5.24703	6.79604	5.07644	2.91623	1.25715
IGDB10994	IGDB10994.1	157.77	14.8164	6.35901	7.01215	9.58908	7.98878	6.75377	3.77911	2.29482	6.69135	7.45419
IGDB10994	IGDB10994.2	0	0	0	0	0	0	0	0	0	0	0
IGDB10994	IGDB10994.3	0.0512175	0.0011155	0.0046305	0.954812	0.24249	8.28336	12.7426	11.1366	11.4173	10.4335	0.001908
IGDB10994	IGDB10994.4	0	0	0	0	0	0	0	0.457163	0	0	0
IGDB10994	IGDB10994.5	0	0	0	0	0	0	0	0	0	0	0
IGDB11016	IGDB11016.1	36.9535	25.346	26.1038	43.9233	61.9364	70.5883	85.7936	75.6556	46.707	49.9427	61.1098
IGDB11016	IGDB11016.2	74.7625	57.2068	13.1683	10.3747	6.38372	14.1065	9.96424	10.6835	3.11479	4.02497	3.18486
IGDB11024	IGDB11024.1	50.9087	34.6198	8.15404	6.90142	9.23078	8.29768	8.83939	9.26936	9.07348	4.15243	2.29084
IGDB11024	IGDB11024.2	9.44451	7.32417	20.3453	13.4687	15.4837	12.7752	12.6628	16.9076	7.00784	6.45089	9.88287
IGDB11031	IGDB11031.1	30.874	21.942	9.37909	6.24747	6.13018	2.47007	4.27262	2.02205	3.67777	6.51158	5.10716
IGDB11031	IGDB11031.2	0.149376	0	1.89576	0.023612	0.030235	0.025247	0	0.0023915	0.00393	0.81323	1.21074
IGDB11031	IGDB11031.3	16.9029	8.82985	8.66389	11.9476	4.83989	5.76945	3.20113	5.18581	5.6643	2.00535	4.90263
IGDB11036	IGDB11036.1	3.17182	2.34176	1.09151	1.07204	0.818535	0.817682	0.455719	0.463849	0.77364	0.875807	1.12199
IGDB11036	IGDB11036.2	0.639816	0.92911	0	0.336402	0.817577	0.907627	1.02148	0.636186	0.115677	0.15696	0.0492815
IGDB11054	IGDB11054.1	0.39601	0.904933	37.9073	12.4229	6.84695	3.76035	4.40997	5.35128	6.7634	7.3393	3.77637
IGDB11054	IGDB11054.2	88.7691	66.3463	1.4631	0	0	0	0	0	0	0	9.24122
IGDB11054	IGDB11054.3	0.166817	0.172747	3.2484	0.236094	0.0306545	0.0005365	0.0355545	0.0188165	0.0580545	0.014462	0.006098
IGDB11075	IGDB11075.1	0.113309	0.189591	0.286473	1.8619	3.90027	4.15709	7.36102	9.11491	9.16476	11.9709	14.3923
IGDB11075	IGDB11075.2	0.321941	0.0240615	0	2.18234	3.44051	6.15233	7.59376	14.5547	13.4463	17.0339	14.3681
IGDB11080	IGDB11080.1	6.1009	2.53722	0.577202	0.195853	0.231398	0	0.923653	0.731141	0.33111	0.591403	0.529945
IGDB11080	IGDB11080.2	0	0	0	0.132457	0.270208	1.06693	0	0	0.26662	1.02478	1.26794
IGDB11084	IGDB11084.1	11.5484	16.6584	5.16495	12.1038	23.4848	10.2217	10.4872	13.0034	18.908	36.5418	19.0773
IGDB11084	IGDB11084.2	0	0	0	0	0.653536	23.1601	28.2907	46.1734	114.649	133.173	212.315
IGDB11102	IGDB11102.1	1.30998	1.48397	0	0.465277	0.0409835	0	0	0.124954	0.0001165	0	0.586221
IGDB11102	IGDB11102.2	5.53945	1.98645	0.176496	0.171426	0.566677	1.29514	1.19727	1.00292	2.23074	3.41762	4.90376
IGDB11102	IGDB11102.3	1.52267	0.872935	0.969411	0.983063	0.179552	0.107758	0.657075	3.28292	3.88626	3.63595	9.60089
IGDB11117	IGDB11117.1	20.3502	19.1197	28.2135	6.85642	11.3597	5.91601	1.24222	3.98899	3.03317	2.9576	43.5892
IGDB11117	IGDB11117.2	10.2694	13.5707	30.8542	8.89715	7.69352	6.85396	7.59941	7.28101	4.59803	3.76038	8.92554
IGDB11123	IGDB11123.1	0	0	0	0	0	0.569941	2.97672	5.95784	3.93021	2.53193	3.73379
IGDB11123	IGDB11123.2	0	0	0	0	0.332484	0.459516	1.62609	2.54703	3.064	1.17215	8.84969
IGDB11123	IGDB11123.3	0	0	0	0	0.014415	0.650938	5.33343	3.88625	4.06946	2.97033	0.53828
IGDB11123	IGDB11123.4	0.211008	0.100761	0.005768	0.0786705	0.048112	0.502444	1.48768	4.2035	2.70942	1.64101	3.34912
IGDB11123	IGDB11123.5	0	0	0	0	0	1.41295	0	15.9271	2.64727	4.60586	16.2593
IGDB11123	IGDB11123.6	0.158487	0.0624265	0	0	0.108167	0.476311	7.8906	2.08632	11.7122	2.76506	0.71122
IGDB11123	IGDB11123.7	0	0	0	0	0	0.127865	0	0.350581	0.0241455	0.0462225	0.117684
IGDB11123	IGDB11123.8	0.185352	0.105835	0	0.126033	0.135511	1.51521	4.47437	12.6065	7.17842	3.98339	18.1091
IGDB11129	IGDB11129.1	0.0140355	28.5484	46.3355	0.324503	0.094632	0.06159	0.137031	0.0578165	0.285583	0.123489	0.233167
IGDB11129	IGDB11129.2	0.203047	7.6333	49.1721	12.6234	4.79109	2.46832	1.86897	1.83286	1.48254	1.35805	4.33953
IGDB11138	IGDB11138.1	35.1467	13.8474	14.3331	8.94571	2.72631	4.54187	12.1205	17.8672	6.76452	3.3958	8.75402
IGDB11138	IGDB11138.2	87.0309	24.1896	8.1051	0.304739	11.5373	19.1521	12.801	3.47116	8.72268	14.4635	0.461443
IGDB11138	IGDB11138.3	0	0	0	0	0	0	0	0	0	0	0
IGDB11138	IGDB11138.4	0	0	0	0	0	0	0	0	0	0	0
IGDB11141	IGDB11141.1	0	0	0	0.0707635	0.0844805	0.307943	0.421699	0.410754	0.23985	1.30898	1.44073
IGDB11141	IGDB11141.2	0	0	0	0.0134965	0.300553	0.373126	0.543244	0.704598	0.780161	1.08887	0.795579
IGDB11145	IGDB11145.1	1.8886	1.82966	1.03579	1.71545	2.85276	4.8596	4.35765	4.46173	3.95857	8.36014	7.41692
IGDB11145	IGDB11145.2	16.2789	15.4289	1.18658	0.638644	0.893619	1.09303	1.15453	0.522242	1.13725	0.505617	1.20847
IGDB11153	IGDB11153.1	0.090978	1.51434	2.27512	0.583198	1.20498	2.9615	5.00349	2.05552	8.7927	7.49237	0.998274
IGDB11153	IGDB11153.2	0	0.096649	6.57588	8.17403	13.0129	21.1813	25.9156	45.8755	14.5073	9.74281	10.3641
IGDB11153	IGDB11153.3	0	0.620797	8.57519	9.82819	15.2799	25.1401	35.5709	34.1146	39.4296	23.1639	12.1317
IGDB11176	IGDB11176.1	0	0	0.0112325	0.0335205	0.531162	9.87322	5.19645	19.8587	17.1109	32.3857	7.18476
IGDB11176	IGDB11176.2	0	0	0	0	0	2.43727	21.1688	31.0551	32.2052	10.7597	8.59006
IGDB11176	IGDB11176.3	0.0756115	0.17881	0.049516	0.0728135	0.342269	0.187306	2.51738	3.41746	2.48625	0.247124	0.163999
IGDB11176	IGDB11176.4	0	0	0	0	0	0	0	0	0	0	0
IGDB11179	IGDB11179.1	0	0.111487	0.066141	0.216582	0.932234	2.52006	4.56214	7.68453	9.4732	10.1405	3.36478
IGDB11179	IGDB11179.2	0.084395	0.0045075	0.094195	0.0212285	0.149467	0.399193	1.33658	1.4312	1.91074	5.93185	1.8438
IGDB11181	IGDB11181.1	0	1.42749	0.352495	0.19844	0.960795	2.30232	2.9235	6.7892	14.1143	8.20154	1.79686
IGDB11181	IGDB11181.2	0	0.0142375	0	0.236178	0.0077195	0.258011	0.283944	0.484795	1.64321	1.48107	0
IGDB11181	IGDB11181.3	0	0	0	0	0	0	0.298192	0.356025	1.32507	1.48159	0
IGDB11181	IGDB11181.4	0.0075985	0.526905	0	0.159687	0.135661	3.06089	6.03477	11.6651	21.3232	12.7897	1.86437
IGDB11181	IGDB11181.5	0	0	0	0	0	0.037931	0.280819	1.09738	3.71173	2.62572	0.626941
IGDB11181	IGDB11181.6	0	2.45349	0	0	0.881089	0.520443	2.27325	1.69734	2.05684	1.29474	0.129318
IGDB11181	IGDB11181.7	0	0	0	0	0	0	0.150288	0.0393785	0.489722	0.0628605	0
IGDB11181	IGDB11181.8	0	0	0	0	0	0.356422	0.812561	9.6188	3.84073	3.2971	7.5322
IGDB11188	IGDB11188.1	1.29933	1.19423	1.0936	2.60171	2.17678	1.77749	2.15897	19.2239	5.5287	5.55033	3.91184
IGDB11188	IGDB11188.2	25.7146	24.9673	17.0367	19.221	27.0809	27.0591	28.7424	1.752	6.15191	5.65355	3.09271
IGDB11188	IGDB11188.3	0.839376	0.466888	0	0.0073515	0.001363	0.000412	0	0.083493	0	0	0.006956
IGDB11188	IGDB11188.4	70.3248	45.3748	0	0	0	0	0	0.0616065	0	0	0
IGDB11195	IGDB11195.1	20.6188	5.32892	5.0096	3.82606	5.14687	19.958	3.10495	19.0035	2.1962	2.813	2.84356
IGDB11195	IGDB11195.2	0.310532	23.8909	17.552	22.5131	18.5637	0.063603	15.6844	0.028288	1.30209	16.5041	16.8353
IGDB11195	IGDB11195.3	0	0	3.74125	0	0	0	0	0	0	0	0
IGDB11195	IGDB11195.4	27.5044	2.35175	0	0.072839	0.034328	0.065943	1.28204	0.426031	11.6536	1.55452	8.42429
IGDB11213	IGDB11213.1	0.348257	0.308715	0.3142	5.92632	8.56599	2.96595	0	0	3.3614	0	0
IGDB11213	IGDB11213.2	0	0	0	0	0	6.43906	12.0942	10.4964	4.36679	8.25401	4.23009
IGDB11213	IGDB11213.3	0	0.001011	0	1.73688	18.9118	17.085	22.9279	21.4798	13.4178	10.5204	3.56889
IGDB11213	IGDB11213.4	0	0.02887	0	0	0.0123655	0	0.016778	0	0	0	0
IGDB11219	IGDB11219.1	20.6511	9.23755	7.27432	0.70955	0	0	0	0.98677	0.995104	0	0.572407
IGDB11219	IGDB11219.2	8.22569	22.5314	3.35271	8.11806	10.3946	16.631	24.5239	18.57	17.8209	17.9927	9.82721
IGDB11219	IGDB11219.3	0	0	0.000277	0.0006395	0.0004145	0.0131765	0.11071	4.0846	0.005519	0.033247	0.0006135
IGDB11232	IGDB11232.1	0	0	0.0091975	0.163459	0.0817345	0.259352	0.47544	0.58099	0.747502	0.279964	0.112838
IGDB11232	IGDB11232.2	0.0195585	0.128241	0.0043895	0.000353	0.24333	2.78256	5.09848	7.3138	7.58831	5.07437	0.36167
IGDB11232	IGDB11232.3	0	0	3.48034	9.42993	18.562	29.7963	43.6537	50.9456	58.0408	46.3352	23.8186
IGDB11265	IGDB11265.1	0	0.129792	0.25847	0.543145	1.67928	0.488942	0.66816	0.207506	0.944979	0.766638	3.94176
IGDB11265	IGDB11265.2	0	0	0	0	0	0	0	0	0	6.14475	11.9284
IGDB11265	IGDB11265.3	0	0	0	0	0	0	0	0	1.35407	0	0
IGDB11265	IGDB11265.4	0	0	0	0	0	0	0	0	0	0	0
IGDB11265	IGDB11265.5	0	1.50403	38.6462	8.67686	1.603	0.647616	0.283284	1.06292	1.34031	1.24805	2.83756
IGDB11273	IGDB11273.1	0	1.86432	2.15889	1.92708	1.89876	0.565377	0.0275	0.0095775	1.23222	1.10051	2.35369
IGDB11273	IGDB11273.2	0.0823885	0.39906	2.39166	0.332249	0.392196	0.874655	1.67114	1.49376	1.34036	0.01302	0.134771
IGDB11273	IGDB11273.3	0	0.494032	1.58094	4.34716	3.16832	4.15506	7.10156	7.60196	5.0477	2.49515	2.51039
IGDB11273	IGDB11273.4	0	1.57205	15.9036	17.5297	14.7079	29.3294	26.8148	21.2454	15.9552	8.99398	7.3731
IGDB11273	IGDB11273.5	0	0.676136	0	0	0	1.15062	6.20906	10.3703	5.74273	5.02021	0.818528
IGDB11273	IGDB11273.6	0	0.000386	0	0.000798	0.0003795	0	0.0017135	0.0029125	0.0015375	0.0001715	0
IGDB11286	IGDB11286.1	0.968439	2.82479	3.62124	3.90936	2.58704	4.74458	6.51807	5.28145	4.01796	5.18075	3.29613
IGDB11286	IGDB11286.2	62.7813	49.3789	4.57632	0.0502395	0.0075655	0.071329	0.050242	0.347425	0.0045625	0.0570025	1.26015
IGDB11286	IGDB11286.3	0.180313	24.1519	70.0259	4.74363	9.79786	2.52428	0.655648	0.138288	0	0.382113	0.918313
IGDB11286	IGDB11286.4	5.37447	20.0914	18.2889	4.4634	9.12427	11.4865	37.5827	6.98617	7.80296	17.7261	12.2949
IGDB11286	IGDB11286.5	2.17495	5.08335	35.2581	31.1422	17.755	23.8728	0	23.234	17.3143	11.1663	1.35972
IGDB11286	IGDB11286.6	0	4.72263	6.97411	0.436869	0.919712	0.535736	0.239171	0.197206	0	0	0.002126
IGDB11286	IGDB11286.7	28.8795	4.13875	8.78104	1.53025	6.59509	1.23435	1.58365	1.12427	1.04571	1.71906	8.0767
IGDB11286	IGDB11286.8	3.08656	1.95669	2.27007	0.371943	4.61597	0.393699	0.605912	0.106478	0.261613	0.402056	8.94944
IGDB11287	IGDB11287.1	5.37051	6.25801	0	0	1.95004	0.505234	0	0.891424	0	1.11359	0
IGDB11287	IGDB11287.2	0	0	18.2791	10.4581	22.0961	20.014	19.2133	9.11844	6.43244	7.06212	16.6313
IGDB11287	IGDB11287.3	47.5882	36.7602	15.9859	15.2901	6.00481	11.1285	9.30581	15.8723	13.0474	16.1475	9.92344
IGDB11288	IGDB11288.1	9.47298	10.2748	27.0012	10.6802	16.7735	11.3768	10.6722	13.1897	15.5651	17.8313	18.3475
IGDB11288	IGDB11288.2	0	0	42.5086	18.5989	0	0	2.48816	2.05568	1.8336	1.72516	2.61434
IGDB11288	IGDB11288.3	0	0	0	0	0	0	0	0	0	0	0
IGDB11293	IGDB11293.1	0	0	0	0.234688	0.232812	1.47759	2.77836	7.63649	14.7572	9.17482	9.02038
IGDB11293	IGDB11293.2	0.073995	0	0.165984	0.09967	0.300113	2.12319	6.3272	14.5807	20.3107	15.6069	3.76609
IGDB11293	IGDB11293.3	0	0	0	0.008427	0.000995	1.32107	4.95898	17.6317	46.3828	41.7211	9.18772
IGDB11298	IGDB11298.1	21.1028	7.50031	3.33436	7.92774	11.1177	15.4735	8.76571	9.25527	9.80621	10.0823	12.9794
IGDB11298	IGDB11298.2	11.3113	12.1376	5.33891	13.3535	21.1473	33.4863	31.9608	39.0377	77.6859	40.1923	127.173
IGDB11304	IGDB11304.1	0	0	0	0.0123395	2.69847	4.06999	4.17364	10.3222	9.23255	6.2934	4.67125
IGDB11304	IGDB11304.2	0.036066	0.0224475	1.63931	1.62365	1.61492	1.42028	3.34097	0.556911	0.646159	2.34407	2.90337
IGDB11312	IGDB11312.1	7.12082	2.29283	0.987291	2.23641	1.89371	3.16695	2.82221	3.44607	2.54214	1.79103	1.09121
IGDB11312	IGDB11312.2	7.72417	4.64199	2.08044	0.701684	3.1597	2.41458	2.92981	1.42001	1.13639	2.45356	2.73396
IGDB11324	IGDB11324.1	0	0	0	0	0	0	0	0	0	0	14.0005
IGDB11324	IGDB11324.2	0	0	0	0	0	0	0	0	0	0	0
IGDB11324	IGDB11324.3	0	0	0	0	0	0	0	0	0	0	0
IGDB11324	IGDB11324.4	0	0	0	0	0	0	0	0	0	0	0
IGDB11324	IGDB11324.5	3.22951	5.35443	2.07077	0.378153	0.187955	0.0807605	0	0	0	0.0150565	14.4143
IGDB11324	IGDB11324.6	0	0	0	0	0	0	0	0	0	0	0
IGDB11324	IGDB11324.7	14.3627	13.6335	5.10618	0.541193	0.321682	0.048123	0.131667	0.0158485	0	0.0925335	11.3003
IGDB11324	IGDB11324.8	0	0	0	0	0	0	0	0	0	0	0.0108985
IGDB11324	IGDB11324.9	0	0	0	0	0	0	0	0	0	0	0
IGDB11339	IGDB11339.1	0	0.438022	0.012397	0	0.0273715	0.675849	3.55038	12.2941	16.2884	14.2513	4.16147
IGDB11339	IGDB11339.2	0.314421	0.872902	0.270652	0.278471	0.420664	0.241506	0.239452	8.33532	16.5685	13.1438	5.10019
IGDB11345	IGDB11345.1	0	0.165214	0.431001	0.746887	1.58046	5.32657	10.2725	71.5143	25.1634	110.694	28.8463
IGDB11345	IGDB11345.2	0.410265	0.705359	0.635377	1.27449	3.99012	14.3142	28.0123	33.9956	125.379	3.01945	18.4315
IGDB11345	IGDB11345.3	0	0	0	0	0	0	0	0	0	0	0
IGDB11363	IGDB11363.1	0	0	9.6201	3.33962	5.48087	3.04185	1.88461	1.66437	3.97352	3.92628	4.57698
IGDB11363	IGDB11363.2	0.024611	1.32431	11.7952	0.4918	0.801188	0.322686	1.00319	2.36205	11.5067	7.30587	3.91732
IGDB11403	IGDB11403.1	2.11362	1.59159	0.667979	0.167097	0.480598	1.01618	1.95744	1.38464	1.3686	0.96172	1.53199
IGDB11403	IGDB11403.2	16.1253	9.0342	0	0	2.87013	2.88749	3.04979	7.44893	4.97155	4.555	1.66089
IGDB11412	IGDB11412.1	2.6871	2.98183	6.05032	23.3923	20.9859	50.9114	70.8011	28.1756	66.11	46.967	4.18716
IGDB11412	IGDB11412.2	0.889239	0.850164	4.14822	6.15693	10.2402	36.2226	42.4155	48.2457	50.6886	36.5738	23.8574
IGDB11412	IGDB11412.3	0	0.0326045	0.042865	0.048563	0.109203	0.184116	0.344398	0.389197	0.183603	0.197521	0.066691
IGDB11412	IGDB11412.4	0	0	0	0	0	0	0	0	0	0	0
IGDB11420	IGDB11420.1	20.2419	26.147	16.913	5.79022	18.9546	18.2929	15.1108	15.1758	9.54282	7.45203	4.25322
IGDB11420	IGDB11420.2	3.49031	0.831599	7.78308	10.3603	2.7135	9.75823	13.1528	8.63769	5.227	5.60462	6.90688
IGDB11420	IGDB11420.3	0.889406	1.1568	1.93166	0.935829	1.29902	0.997045	0.710903	0.539612	0.656655	0.436925	0.580147
IGDB11433	IGDB11433.1	2.81756	0.377773	0.377558	0	0	0.054552	0	0	0.100133	0.12573	0.848396
IGDB11433	IGDB11433.2	17.93	4.96233	0	0	0	0.007226	0.043626	0.055683	0.0467915	0.0485915	0.655272
IGDB11433	IGDB11433.3	239.178	93.4854	0.896548	0.071154	0.202531	0	0	0	0	0	2.97439
IGDB11433	IGDB11433.4	1.68354	3.71985	0	0	0	0	0	0	0	0	0
IGDB11433	IGDB11433.5	21.6478	13.6151	0.0052205	0.0292685	0	0.0780245	0.0207445	0.082516	0.0308515	0.082135	4.20048
IGDB11434	IGDB11434.1	0.050028	0.0911015	0.109823	0.103698	0.546232	0.882285	1.60489	1.32499	2.41829	1.95405	1.55713
IGDB11434	IGDB11434.2	0	0	0.172107	0	3.17486	0.156023	0	0.73224	0.44135	0	0.560731
IGDB11442	IGDB11442.1	53.6504	34.1598	22.7796	24.2023	17.2372	10.8754	12.9133	10.1612	13.9864	12.5949	9.60156
IGDB11442	IGDB11442.2	81.3136	57.9171	10.9059	19.578	14.3242	13.1006	13.0364	18.6706	9.94622	3.29221	0.524925
IGDB11478	IGDB11478.1	6.48567	12.7601	34.7312	12.2261	12.036	6.45259	11.2189	16.6286	12.5289	14.8434	14.6011
IGDB11478	IGDB11478.2	0.228741	5.71974	53.1781	32.6798	9.30449	9.28851	9.15125	9.30947	10.0958	15.7856	11.1528
IGDB11478	IGDB11478.3	0	0	0	0	0	0	0	0	0	0	0
IGDB11482	IGDB11482.1	21.1568	15.6258	1.10027	2.38425	5.38164	10.8771	11.1562	8.73447	11.3634	10.7272	9.20191
IGDB11482	IGDB11482.2	2.00568	6.11961	9.63224	10.3057	7.76941	5.67846	6.37519	9.71952	6.60392	15.3264	10.3644
IGDB11494	IGDB11494.1	62.3137	39.4071	5.2087	8.16762	10.8847	8.35449	7.70917	2.42135	2.43777	5.63271	4.39331
IGDB11494	IGDB11494.2	63.2383	46.134	11.6696	7.25753	1.68813	3.54069	7.46926	13.9411	17.5127	15.1058	7.36396
IGDB11505	IGDB11505.1	2.18254	3.84893	1.20927	1.3353	1.34879	0.31259	0.0592055	0.103386	0.066606	0.10645	0.296747
IGDB11505	IGDB11505.2	6.39695	6.49927	2.45199	0.889385	0.856539	1.06506	0.850464	0.342286	0.300131	0.311542	0.355797
IGDB11521	IGDB11521.1	0	22.081	0	29.6995	70.3386	109.444	128.084	116.495	79.5104	48.0791	18.6644
IGDB11521	IGDB11521.2	0	0	0	0	0	0	0.639587	1.65962	0	1.67481	1.6029
IGDB11521	IGDB11521.3	50.9314	30.6598	80.7235	49.1891	20.2376	26.9253	37.615	26.5638	14.0481	12.3068	12.0735
IGDB11521	IGDB11521.4	0	0	0	0	0	0	0	0	0	0	0
IGDB11521	IGDB11521.5	0	35.5382	23.1673	5.14203	2.91806	0	0	2.23838	1.86989	0	0
IGDB11521	IGDB11521.6	0	0	0	0	0	0	0	0	0	0	0
IGDB11521	IGDB11521.7	0	0	0	0	0	0	0	0	0	0	0
IGDB11527	IGDB11527.1	8.8962	8.52449	0.317474	0	0.069404	0.153468	0	0.009614	0.006643	0.906076	0.631359
IGDB11527	IGDB11527.2	14.5554	2.51207	0.327784	0.748665	0.599376	1.34591	3.06476	4.49871	5.38345	3.9819	0.806172
IGDB11527	IGDB11527.3	0	0	0	0.839701	2.43168	3.66578	3.2004	4.85255	6.56563	6.93341	6.54279
IGDB11527	IGDB11527.4	0.048172	0	0	0	0.085507	0.823353	1.29151	2.08137	4.00853	2.62045	0.807743
IGDB11542	IGDB11542.1	0.734131	3.73008	23.3806	21.4555	48.1257	36.6954	97.2769	97.1351	69.2922	42.8445	15.8379
IGDB11542	IGDB11542.2	0.37513	0.960271	4.41546	5.39043	7.80062	59.9978	16.9165	17.6488	14.5261	11.4817	13.497
IGDB11542	IGDB11542.3	0	0	0	0	0	0	0	0	0	0	0
IGDB11542	IGDB11542.4	0	0	0	0	0	0	1.03187	0	0	0	0
IGDB11565	IGDB11565.1	4.78374	8.22983	10.641	4.59327	8.67274	0.249388	21.92	0.40597	45.4338	4.58666	1.6411
IGDB11565	IGDB11565.2	0	0	0	8.38457	9.47467	41.0293	34.2392	61.2702	0.002837	37.0079	22.4268
IGDB11565	IGDB11565.3	0	0	0	0	0	0	0	0	0	0	0
IGDB11565	IGDB11565.4	0	0	0	0	0	0	0	0	0	0	0
IGDB11595	IGDB11595.1	0.00809	0.407201	4.58999	3.22314	1.78495	0.143879	0.01508	0.0196865	0	0	0.0061795
IGDB11595	IGDB11595.2	0	0.352266	4.33318	3.70152	2.22065	0.50347	0.181628	0.004202	0	0	0
IGDB11595	IGDB11595.3	0	0.753471	8.54893	13.6364	3.61348	0.664436	0.002136	0	0	0	0
IGDB11595	IGDB11595.4	0	21.3553	879.101	2931.85	1848.07	281.874	26.9813	2.12253	0	0	0.0543385
IGDB11596	IGDB11596.1	0	0.0350835	0.327879	0.340743	0.501743	0.72107	0.963776	1.00195	0.535082	2.73253	1.19917
IGDB11596	IGDB11596.2	0	0.22607	0.255173	0.284262	0.13589	0.611432	0.642368	0.620722	0.798322	2.956	2.87504
IGDB11598	IGDB11598.1	0	0	0	0	0.146854	0	2.23885	5.35343	5.91863	3.18586	10.8568
IGDB11598	IGDB11598.2	5.03397	2.75685	0.830253	0.61215	0	0	0	0	0	0	0
IGDB11598	IGDB11598.3	0	4.23506	0	0	6.71454	6.95159	4.64612	2.05297	3.04396	8.21806	0.985243
IGDB11600	IGDB11600.1	0.0850545	0	0	0.206471	4.20533	3.68053	0.456286	0.770852	7.84985	19.9516	76.0374
IGDB11600	IGDB11600.2	0.0272915	0.0205255	0.132133	0.033495	0	0	0	0	0.02642	0.213212	2.12483
IGDB11600	IGDB11600.3	0	0	0	0	0	0	0	0	0	0	0
IGDB11678	IGDB11678.1	0.0222435	0.0056835	0.197704	1.14713	0.859733	0.865255	2.57934	7.52987	7.6891	5.95689	2.92354
IGDB11678	IGDB11678.2	0	0	0	0.0320865	0.250144	5.00087	12.1893	20.7527	33.0566	25.7346	7.11564
IGDB11678	IGDB11678.3	0	0.0573645	0.253778	0.019024	0.0686855	1.30052	1.63137	4.02424	3.24108	3.6229	1.82453
IGDB11709	IGDB11709.1	0.0176995	0.268983	0.0806695	0.024189	8.42308	25.3064	33.2424	27.0693	19.7031	11.9799	5.38162
IGDB11709	IGDB11709.2	0.018589	19.2708	11.0217	4.33971	6.47874	16.2377	25.6969	20.4528	16.7314	13.3939	5.17314
IGDB11714	IGDB11714.1	10.2676	15.5559	24.8133	19.4958	18.5086	23.3831	10.362	16.639	0.0477705	8.96646	0.099979
IGDB11714	IGDB11714.2	1.1608	1.49601	2.92115	1.47604	1.62297	2.24401	11.4427	2.2859	12.1626	1.14693	10.4582
IGDB11714	IGDB11714.3	0.111079	0.254497	0.408071	0.297941	0.441972	0.562161	0.228619	0.348683	0.097962	0.139522	0.095914
IGDB11714	IGDB11714.4	0	0	0	0	0	0	0	0	0	0	0
IGDB11720	IGDB11720.1	63.2127	33.2141	3.72052	0.0819895	0	0	0	0	0	2.33083	0.0241615
IGDB11720	IGDB11720.2	21.31	15.0776	49.5804	94.6064	78.753	53.902	52.5352	50.1287	53.0592	51.9635	57.3622
IGDB11720	IGDB11720.3	2.53728	0.816407	4.50782	0.907824	0.539331	0.524201	0.492459	0.432619	0.563177	8.52201	0.770999
IGDB11723	IGDB11723.1	43.8326	25.4672	5.20271	10.4758	11.1539	17.7006	17.6101	25.4999	22.6821	14.4113	5.56521
IGDB11723	IGDB11723.2	2.24254	1.89578	2.22591	8.81356	19.7532	31.1127	29.1468	13.5249	11.9616	8.0683	4.44567
IGDB11730	IGDB11730.1	2.21151	6.63312	5.00283	7.17998	0.782649	1.11992	1.76625	6.21138	1.27646	2.17917	1.23419
IGDB11730	IGDB11730.2	3.34405	2.72615	0.945044	0.758163	1.38	4.44137	6.77168	5.50339	5.63092	4.08173	4.79219
IGDB11730	IGDB11730.3	20.614	15.719	4.34643	0.0598	10.0751	11.6997	16.0083	15.7522	13.0925	17.3535	16.7186
IGDB11730	IGDB11730.4	0	0	0	0.0835965	0.041072	0.202039	0.083559	0.337452	0.600745	0.450653	1.57013
IGDB11730	IGDB11730.5	0	0.0246095	0	0	0	0	0.0228775	0.166354	0	0.477162	0
IGDB11732	IGDB11732.1	0.292289	1.97771	5.9623	29.4086	53.3624	35.2598	18.3694	28.83	52.8727	27.5507	16.201
IGDB11732	IGDB11732.2	21.7345	37.561	7.96676	15.1928	6.07876	11.3501	5.18214	5.04127	14.9993	3.32253	9.87333
IGDB11732	IGDB11732.3	1.07835	1.74694	3.82429	1.56286	2.88352	1.99387	2.08755	2.45116	0.985765	1.35358	0.634239
IGDB11732	IGDB11732.4	50.052	36.6403	38.0542	5.10925	1.95082	2.4955	3.53878	1.33571	0	0.462342	2.40344
IGDB11758	IGDB11758.1	9.06067	4.3417	2.27597	8.15324	11.7795	16.0174	23.5137	26.2903	25.0008	15.2903	9.26013
IGDB11758	IGDB11758.2	0	0	0	0	0	0	0	0	0	0	0
IGDB11758	IGDB11758.3	18.7688	0.49436	0	2.05965	1.70898	5.35511	4.75366	4.34073	2.04157	3.07374	2.4608
IGDB11769	IGDB11769.1	1.72714	1.60961	1.5316	2.1445	0.871345	0.0798685	0.264838	0.726159	1.28881	1.00427	1.1768
IGDB11769	IGDB11769.2	41.6727	32.2238	0.250462	0	0.275552	0.0027285	0	0	0	0	0.133674
IGDB11769	IGDB11769.3	0	0	8.22719	0.371719	1.54843	1.75672	1.33602	0.858672	0.437284	2.0234	5.5964
IGDB11778	IGDB11778.1	0.0371125	0.032873	0.010171	0.0120395	0.131383	0.322576	0.537852	4.86101	22.9085	27.4213	25.3014
IGDB11778	IGDB11778.2	0	0	0	0.0465	0.0805645	1.82161	3.99368	9.38855	14.1897	16.7974	16.5785
IGDB11780	IGDB11780.1	0.999842	20.1725	38.7689	6.23676	6.7152	6.5121	4.26841	7.05125	7.40125	7.49206	12.1591
IGDB11780	IGDB11780.2	1.67114	5.1961	4.62527	1.15044	2.01	2.97093	3.15553	3.79079	3.47119	6.84852	7.35524
IGDB11784	IGDB11784.1	3.9349	43.7045	13.5542	3.49039	14.4548	28.3257	36.5384	37.0122	24.0121	22.5277	14.1657
IGDB11784	IGDB11784.2	34.1751	17.556	22.8155	20.3464	14.1561	9.15308	8.33063	6.05768	3.75732	3.49061	5.70142
IGDB11784	IGDB11784.3	2.93271	0	1.70548	2.7459	2.64012	5.19391	5.25324	4.79366	7.39935	3.57368	6.36724
IGDB11784	IGDB11784.4	0.0489105	0.0885405	0	0	0.0073295	0	0.0026765	0.0020975	0.003984	0.0166125	0.0247035
IGDB11784	IGDB11784.5	34.5827	54.0317	26.8334	4.82934	11.9358	5.86256	7.26794	2.1425	1.65717	2.43128	4.34744
IGDB11784	IGDB11784.6	0.430297	0.613619	0.093615	0.0580255	0.0714735	0	0	0.0088815	0.073567	0.174951	0.623205
IGDB11790	IGDB11790.1	1.04253	3.23076	5.20235	11.3411	20.7069	25.0005	8.48137	24.9381	5.73874	4.6141	14.847
IGDB11790	IGDB11790.2	4.80596	2.27685	0.901563	0.038727	1.42372	0.111904	0.12368	0.0665985	0	0.0100495	0.074238
IGDB11790	IGDB11790.3	2.34418	2.32688	0	0	0	0	0	0	0	0	0
IGDB11790	IGDB11790.4	70.6636	63.5899	44.6182	19.172	14.2576	10.7614	24.6804	1.42015	9.9182	11.701	1.92902
IGDB11794	IGDB11794.1	46.685	14.0717	11.2587	6.47797	2.76738	2.40616	3.29715	1.73618	1.98439	2.18925	3.31765
IGDB11794	IGDB11794.2	0.004888	2.96109	8.66148	9.87641	11.7787	13.4164	16.1097	17.7014	10.5437	10.3284	7.85417
IGDB11800	IGDB11800.1	556.048	412.453	2.44611	0.212914	0.488809	0.00791	1.02922	3.68292	0	0.976687	35.6174
IGDB11800	IGDB11800.2	411.2	249.117	52.2691	50.4221	41.3	54.874	83.384	104.126	115.479	90.971	258.374
IGDB11812	IGDB11812.1	0.135761	0.216209	0.39183	0	1.48842	0.346397	0.845646	1.82418	0.925079	1.52495	1.77478
IGDB11812	IGDB11812.2	0	0	0	0.562259	0.8244	7.22504	17.181	25.7106	24.4314	20.2628	9.99855
IGDB11812	IGDB11812.3	0	0	0	0	0	0	0	0	0	0	0
IGDB11812	IGDB11812.4	0	0	0	0	0	0	0	0	0	0	0
IGDB11820	IGDB11820.1	10.9485	4.16679	5.80485	6.1012	4.48045	3.36145	1.81415	1.89202	0.726675	0.654902	0.969375
IGDB11820	IGDB11820.2	0.35567	0.005575	0.839082	2.41347	8.57624	11.4313	15.303	14.4715	15.0578	16.882	15.0981
IGDB11829	IGDB11829.1	34.8048	38.5423	5.47761	8.63663	15.1703	16.8223	18.761	16.3126	11.6251	14.1941	18.1676
IGDB11829	IGDB11829.2	45.7462	40.9926	38.332	34.2592	22.8725	10.3398	3.25283	3.83198	0.76391	1.95159	3.47839
IGDB11829	IGDB11829.3	1.26344	0.860087	2.67423	4.02805	9.42846	27.2887	43.5891	44.7609	46.3548	35.1447	16.9343
IGDB11829	IGDB11829.4	0.0012285	0.0027195	0.042693	0.01273	0.058031	0.618764	1.5024	1.62247	1.73238	1.36457	0.127925
IGDB11829	IGDB11829.5	0	0	0	0	0	0	0	0	0	0	0
IGDB11833	IGDB11833.1	33.8876	40.6477	5.59853	7.22685	11.3221	14.3526	21.362	27.7339	22.8445	17.7105	9.46133
IGDB11833	IGDB11833.2	33.3072	31.2381	25.0891	13.5193	10.8289	9.10179	8.35411	9.32723	12.5805	9.09407	9.47386
IGDB11833	IGDB11833.3	0.076576	0.329815	0.279641	1.11694	0.299343	0.0575325	0	0	0.844544	0.997583	6.1335
IGDB11834	IGDB11834.1	0.807057	1.96567	3.45177	2.22553	0.617075	0.589867	0.390127	0.179133	0.247641	0.103235	0
IGDB11834	IGDB11834.2	0	0.711439	7.88339	7.48837	2.6545	1.19885	0.66967	0.444993	0.277189	0.21467	0.191178
IGDB11838	IGDB11838.1	122.355	58.1492	12.3	0	6.36043	0.188854	0.216739	0	3.81921	3.54069	16.4023
IGDB11838	IGDB11838.2	12.0401	7.40355	11.6556	11.9874	2.2677	5.71387	6.20893	7.03275	5.07767	6.54472	4.19805
IGDB11838	IGDB11838.3	0	0	0	0	0	0	0	0	0	0	0
IGDB11851	IGDB11851.1	28.0807	14.9437	2.65199	8.29816	12.6769	19.3164	30.1625	56.5698	47.7538	48.6348	20.6091
IGDB11851	IGDB11851.2	6.75442	2.75826	10.0205	16.7521	11.8058	12.2862	15.4849	16.9551	21.9108	9.51994	8.05013
IGDB11851	IGDB11851.3	0	0	0	0	0	0	0	0	0	0	0
IGDB11865	IGDB11865.1	17.8887	11.5303	37.8753	35.8037	10.8675	14.5733	81.7985	14.0245	39.3506	18.9153	3.07501
IGDB11865	IGDB11865.2	0	0	0	0	0	0	0	0	0	0	0
IGDB11865	IGDB11865.3	183.896	114.488	20.2695	21.3788	55.0423	66.4949	0.493974	47.0599	0.0587855	9.72189	19.1908
IGDB11890	IGDB11890.1	0.940019	0.491134	1.21185	0.575759	0.857791	1.31201	1.62462	1.98256	2.66734	1.92216	1.69031
IGDB11890	IGDB11890.2	0	0	0.0786455	0.129963	0.2862	0.81158	1.98944	3.6455	0.9455	0.899338	0.516941
IGDB11890	IGDB11890.3	0	0	0.558752	1.38684	2.13237	3.22228	4.09274	5.18117	5.97414	6.19846	2.85375
IGDB11893	IGDB11893.1	0	0.007043	0	0	0.164868	2.22125	4.63008	6.59924	6.95215	5.30574	1.72287
IGDB11893	IGDB11893.2	0.008048	0.050981	0.0748465	0.104189	0.107062	1.18876	3.36454	10.6398	8.53472	6.38245	1.25177
IGDB11895	IGDB11895.1	0	0	0	0.115751	0.474197	0.121712	0.889957	0.177406	4.8948	4.48433	2.748
IGDB11895	IGDB11895.2	0	0	0	0.316954	3.32463	2.54601	6.2516	2.81563	4.68211	4.08889	0.575967
IGDB11895	IGDB11895.3	0.098188	0.0605265	0.046623	1.84463	1.90847	2.87003	2.79793	6.37903	0	0	1.45985
IGDB11915	IGDB11915.1	1.29218	1.59304	45.6726	18.5235	6.79495	6.98712	11.3807	13.6124	12.8358	11.8467	6.66605
IGDB11915	IGDB11915.2	11.0259	12.3294	8.61082	20.6416	6.19914	5.39728	6.66917	7.20488	6.11092	7.51915	3.00325
IGDB11942	IGDB11942.1	12.0938	9.49348	3.54946	5.463	2.95134	5.83566	5.38032	3.28696	4.50075	3.62536	5.14253
IGDB11942	IGDB11942.2	32.6036	22.2861	8.91625	10.8508	19.1781	11.1141	13.0668	15.5502	13.5821	10.2504	9.75722
IGDB11942	IGDB11942.3	78.4689	47.3774	17.5086	5.19851	2.83167	6.65921	4.97379	1.26437	8.86431	11.3609	16.4876
IGDB11958	IGDB11958.1	1.36431	0	1.08929	1.00985	2.55424	2.44624	0	0	3.54942	3.34392	3.03218
IGDB11958	IGDB11958.2	0.373414	1.16261	1.58491	2.21987	3.92861	4.74102	8.96584	9.17978	4.18254	3.44442	1.04976
IGDB11960	IGDB11960.1	6.80329	5.80019	12.1341	15.3891	11.0875	9.8602	11.9866	11.8918	10.3532	13.035	10.3471
IGDB11960	IGDB11960.2	6.79225	6.51183	4.79862	8.37224	12.5574	18.3038	20.0508	31.1288	29.7151	19.5666	12.2833
IGDB11967	IGDB11967.1	0	1.74028	1.33985	0.825618	0.21331	0.22064	0.045756	0.12237	0	0.136856	0.040955
IGDB11967	IGDB11967.2	0	8.10466	0.935754	1.24288	0.164613	0.090246	0.010137	0.021793	0	0.0148375	0.0119715
IGDB11978	IGDB11978.1	22.5491	14.3738	0	0.0083145	0.0224425	0	0.09562	0.0007705	0	0.0037735	0.436435
IGDB11978	IGDB11978.2	2.36894	1.85657	0.54423	0	0.201289	0	0	0.320767	0.550653	0	0.490162
IGDB11978	IGDB11978.3	49.328	28.2553	0	0.240359	0.608864	0.914741	1.33362	1.61674	1.12587	4.89962	5.5082
IGDB11978	IGDB11978.4	1.41281	1.71616	0.35011	0.0759635	0.0077195	0.153903	0.0398615	0.764201	0.989615	0.479946	0.237728
IGDB11994	IGDB11994.1	85.6106	66.0961	26.4268	16.7949	5.81183	8.44195	20.2232	12.4984	6.84905	8.02982	5.66037
IGDB11994	IGDB11994.2	0	0	0	0	0	0	0	0	0	0	0
IGDB11994	IGDB11994.3	0.145348	0.199493	2.65244	6.33903	23.7445	28.8474	29.0875	19.5676	10.3163	6.36271	3.00506
IGDB11994	IGDB11994.4	0	0	0	0	10.6791	0	0	0	0	0	0
IGDB11996	IGDB11996.1	45.4267	45.9322	78.1385	48.149	59.098	69.5807	82.1653	59.4457	35.0564	28.1676	27.1495
IGDB11996	IGDB11996.2	80.73	107.604	0	1.4614	3.94719	7.31601	3.07261	5.88633	2.78874	3.33748	1.49518
IGDB12037	IGDB12037.1	0.375452	0.406637	0.040598	0.105852	0.738958	0.09646	0.267051	0.309092	0.240514	0.0422135	0.532789
IGDB12037	IGDB12037.10	0.426129	4.08552	0.136795	0.655488	8.96119	1.43706	1.69689	87.2764	22.4973	0.830207	0.614955
IGDB12037	IGDB12037.11	0	90.7084	114.307	69.5944	151.323	196.841	236.379	146.441	114.755	108.162	74.6058
IGDB12037	IGDB12037.2	0.158336	0.690355	0.186554	0.0316485	0.497281	0.659357	1.799	0.400245	2.66647	0.84528	0.429317
IGDB12037	IGDB12037.3	7.80096	3.65703	0.714603	1.12734	2.04523	0.465265	2.71503	3.60135	12.2192	2.76334	0.155274
IGDB12037	IGDB12037.4	7.25578	5.36103	3.30395	5.33054	10.3781	12.3943	10.7733	7.1257	3.96601	2.41955	3.80314
IGDB12037	IGDB12037.5	14.5824	22.1286	9.10669	16.1658	40.3166	71.1686	65.829	75.9769	57.529	20.8183	16.9453
IGDB12037	IGDB12037.6	2.59821	3.56377	1.56629	2.3292	5.03375	6.71692	6.92954	7.55045	5.29993	3.66289	2.04105
IGDB12037	IGDB12037.7	1.46468	2.2975	1.73019	1.08683	1.89525	2.05998	3.93999	2.83927	6.27818	2.6839	0.42936
IGDB12037	IGDB12037.8	6.2417	13.7371	2.27981	3.62346	8.64986	12.8517	18.2263	11.5133	27.6314	9.04315	2.82155
IGDB12037	IGDB12037.9	172.838	78.3304	28.8014	95.6858	76.6069	123.439	109.334	51.2188	42.5692	55.0719	29.0834
IGDB12040	IGDB12040.1	0.06693	0.956918	100.684	0.368791	0.195023	0	0.627954	0	0.579178	0.505103	0.782086
IGDB12040	IGDB12040.2	0.021659	36.3555	68.214	45.5585	21.7863	9.1462	14.6189	15.7193	19.7314	19.1539	20.0592
IGDB12040	IGDB12040.3	0	0	0	0	0	0	0	0	0	0	0
IGDB12047	IGDB12047.1	16.5585	6.4978	0	0.512421	0.441814	0.263839	0.0007875	0	0	0	0.247875
IGDB12047	IGDB12047.2	10.2458	9.87211	0.43088	0.456062	0	0	0.156782	0.052518	0.079573	0.152198	0.762002
IGDB12060	IGDB12060.1	119.941	99.9996	24.1606	37.3742	39.2596	32.0239	40.7078	43.1525	42.8098	33.4802	23.9249
IGDB12060	IGDB12060.2	0.033622	3.30278	0.000509	3.5e-06	2.19314	4.732	0.333529	0.425154	2.15648	8.27777	12.2163
IGDB12060	IGDB12060.3	0	0	0.0241755	0.0523525	0.171498	26.4426	90.8112	280.849	494.362	376.651	480.624
IGDB12060	IGDB12060.4	0	0	0	0	0.391632	0	0.411695	0.326774	0.0047515	0	0
IGDB12060	IGDB12060.5	0.190937	1.04281	1.89744	0.408651	0.611077	7.69287	0.901745	0.92143	32.6203	75.276	100.419
IGDB12060	IGDB12060.6	0	0	0	0	6.19749	49.0623	37.2601	0	140.649	265.244	115.329
IGDB12060	IGDB12060.7	0.0876925	0.524117	0.537303	0.799963	1.14569	2.5038	4.02041	5.36107	8.24506	27.8465	7.22578
IGDB12071	IGDB12071.1	0.670289	0.573816	0.137887	0.787332	5.7314	7.12437	8.10056	15.2375	6.11104	6.23479	12.5813
IGDB12071	IGDB12071.2	0.0226775	0.039832	0.0538635	0.365363	12.3848	32.0445	38.5158	43.3879	37.6343	37.7774	89.7031
IGDB12080	IGDB12080.1	0.0086675	0.093152	0.069994	0.080635	0	0.170531	0.930582	3.63948	7.09048	5.52976	1.80389
IGDB12080	IGDB12080.2	0	0.078254	0	0	0.0372295	0.428254	0.720954	2.26625	4.26937	3.8	1.72236
IGDB12085	IGDB12085.1	34.6461	33.0541	20.0318	5.10399	3.26109	1.73179	6.09844	1.09546	3.54809	4.43249	2.38518
IGDB12085	IGDB12085.2	39.7318	12.0579	7.2871	3.04988	6.18905	6.99183	8.34967	18.2199	12.3112	12.1838	8.80732
IGDB12085	IGDB12085.3	0	0	0	0	0	0	0	0	0	0	0
IGDB12085	IGDB12085.4	0	0	2.03928	0	0	0	0	0	0	0	0
IGDB12085	IGDB12085.5	11.0085	8.44167	10.1079	1.53216	0.526637	0.733845	0.559021	1.43349	1.09776	1.68647	2.10385
IGDB12091	IGDB12091.1	0.12589	0.350474	3.08308	9.24299	5.82759	4.67839	12.5114	7.20342	9.55374	8.67026	2.41648
IGDB12091	IGDB12091.2	0.0718505	0.635274	3.6541	1.03995	4.9271	39.6848	80.4933	86.5537	49.0218	27.6767	9.70485
IGDB12091	IGDB12091.3	0	0	0	0	0	0	0	0	0	0	0
IGDB12097	IGDB12097.1	0.46021	0	0	1.97042	5.30279	9.36141	9.4961	19.3162	17.7994	16.7824	6.29419
IGDB12097	IGDB12097.2	0.174344	0.225898	0.141137	0.635623	1.67723	16.7705	33.4622	21.6259	8.20073	1.42641	1.78757
IGDB12101	IGDB12101.1	11.1333	2.25838	0.424037	1.50101	0.838759	3.97487	3.25675	2.7386	0.911008	0.947072	2.39077
IGDB12101	IGDB12101.2	1.61776	6.15447	6.6082	8.63696	7.51106	5.33502	5.23257	6.11795	6.2024	7.66589	4.83537
IGDB12125	IGDB12125.1	10.4432	3.6848	6.64424	4.60829	6.5477	10.259	10.067	6.63742	6.61366	6.6444	4.9459
IGDB12125	IGDB12125.2	4.20033	7.607	10.7973	14.917	13.761	15.1947	14.435	19.0568	17.1334	12.5131	9.09876
IGDB12125	IGDB12125.3	0	0.612769	1.57986	1.23297	2.81156	5.46149	6.026	6.08261	5.96249	5.57376	3.69218
IGDB12131	IGDB12131.1	8.76274	19.445	5.22507	7.58482	2.58479	4.24232	3.41991	4.4727	8.70769	2.97257	6.45741
IGDB12131	IGDB12131.2	3.7295	26.6102	17.3444	5.26347	5.92571	1.13505	2.55276	2.6298	4.30003	3.90211	3.17699
IGDB12131	IGDB12131.3	0.0057905	0.03341	0	0	0.005182	0	0.0070225	0	0	1.52943	0
IGDB12133	IGDB12133.1	0	0.465097	10.124	20.828	26.6127	8.50667	29.2592	4.84708	10.3471	7.85978	13.0547
IGDB12133	IGDB12133.2	0	0	18.14	50.2951	21.3471	6.01301	0	2.58044	0	5.46968	2.25934
IGDB12133	IGDB12133.3	0.02402	0.020213	16.6998	40.5593	44.4168	15.5734	1.18039	4.71033	0.416793	2.37822	1.18691
IGDB12143	IGDB12143.1	0.163481	0.136659	0.240312	0.352647	0.12176	4.92852	10.3608	25.3813	19.0658	26.2243	23.8128
IGDB12143	IGDB12143.2	127.416	23.9547	0.113525	0.710435	3.7272	6.1399	7.61097	4.21438	10.4694	6.88818	5.11234
IGDB12157	IGDB12157.1	0	0	0	0.009161	5.6e-05	0	0	0.0250175	0	0	0
IGDB12157	IGDB12157.2	102.265	41.4176	24.5398	5.53407	27.5252	24.896	7.85647	4.89522	9.73472	19.4457	1.55622
IGDB12157	IGDB12157.3	0.0265	0.037426	1.05829	60.2101	12.4907	2.09089	19.4093	16.7543	8.78274	8.00357	0.0221365
IGDB12157	IGDB12157.4	66.4644	49.972	3.67873	0	6.3196	25.8868	21.03	20.0074	10.5879	0	21.5866
IGDB12157	IGDB12157.5	24.3979	35.1976	69.3042	0.0399845	7.45465	0.79871	0.575812	0.010428	0.792541	0.806533	0.249078
IGDB12157	IGDB12157.6	0	0	0	0	0	0	0	0	0	0	0
IGDB12157	IGDB12157.7	0	0	0	0	0	0	0	0	0	0	0
IGDB12167	IGDB12167.1	1.87606	15.1105	9.43296	5.04681	6.37901	8.18224	16.2356	13.104	10.4387	20.2594	15.584
IGDB12167	IGDB12167.2	0.909001	15.1241	28.448	3.84025	3.38264	6.40907	6.15011	5.67596	2.32423	5.21096	1.01685
IGDB12167	IGDB12167.3	0	0.757144	8.41667	5.59524	1.06961	4.77205	3.77306	3.29372	2.79758	1.6974	0.21416
IGDB12167	IGDB12167.4	0	2.97401	14.9223	32.1737	24.3716	23.767	18.9795	33.7743	8.01249	0.493947	0
IGDB12187	IGDB12187.1	56.0368	15.2449	3.06189	0.720584	0.513258	1.16405	0.280456	0.550632	0.824898	0.32224	1.15661
IGDB12187	IGDB12187.2	0.332371	0.110786	0.638854	0.21339	0.760864	1.18875	1.95387	3.80278	4.28214	2.52438	1.77697
IGDB12187	IGDB12187.3	19.1379	3.68032	1.89955	0.009416	0.607926	0.422797	1.4476	0.614506	0.834896	0.953001	0.068201
IGDB12187	IGDB12187.4	0	0	0	0.008977	1.78964	0.569447	0.085176	0.309917	0.863359	0.5906	3.57154
IGDB12187	IGDB12187.5	8.56786	13.0344	0.906698	0	0	0	0	0	0	1.46287	1.86057
IGDB12187	IGDB12187.6	2.52121	0	0.018323	0	0.017898	1.06948	2.7761	5.61898	12.8397	6.26541	4.71258
[truncated: 3,801 more rows]
