# Supplementary material for: Dynamic transcriptional and chromatin accessibility landscape of medaka embryogenesis
Source: Genome Res. 2020 Jun;30(6):924–37. doi: 10.1101/gr.258871.119 (PMC7370878; doi:10.1101/gr.258871.119)
Supplement: Supplemental Material [file supp_gr.258871.119_Supplemental_Table_S5.xlsx]

## Sheet: pioneer_chromvar
Supplemental Table S5 : Summary of TF chromVAR score, pionner score and gene expression level.
Motif_ID	geneid	TF_Name	chromvar.st11	chromvar.st19	RNA.st11	RNA.st19	pioneer.st11	pioneer.st19	pioneer.zebrafish	pioneer.mouse	pioneer.human	pioneer.chicken	st11.pioneer.TF	st19.pioneer.TF
M01030	IGDB26292	tbx16	11.5008	11.9918	231.974	97.2876	4.12807	3.27248	5.89715	2.90452	0.0880747	0.743851	TRUE	TRUE
M00157	IGDB18991	gabpa	10.9666	-4.37717	143.859	89.2311	5.99132	5.02956	6.75968	8.40152	7.48148	4.15602	TRUE	FALSE
M00779	IGDB14789	klf8	16.0452	-1.44346	42.6367	15.7769	5.04751	3.83839	9.84678	10.1397	10.2448	6.79644	TRUE	FALSE
M00991	IGDB18325	creb1a	15.6946	-6.21324	85.8337	43.2272	6.15519	4.92123	8.97557	7.41388	7.33791	4.4864	TRUE	FALSE
M00991	IGDB19034	creb1b	15.6946	-6.21324	14.8035	12.1235	6.15519	4.92123	8.97557	7.41388	7.33791	4.4864	TRUE	FALSE
M01478	IGDB18472	etv5b	14.0353	-4.56289	16.1401	47.2475	6.05216	5.16285	7.23339	8.46349	7.40796	4.82039	TRUE	FALSE
M01481	IGDB24899	elk1	12.8391	-5.00826	23.8402	9.39378	6.16639	5.13073	7.29308	8.59391	7.94625	5.77716	TRUE	FALSE
M01485	IGDB18953	ENSORLG00000020852	12.5047	-5.0766	33.5919	80.5618	5.98725	5.07053	7.12866	8.49809	7.37582	4.1771	TRUE	FALSE
M01487	IGDB17971	etv4	13.0821	-4.71721	12.1067	117.215	6.1537	5.1076	6.8999	8.57374	7.36862	4.36943	TRUE	FALSE
M01492	IGDB11780	elf1	10.0064	-3.63683	26.3686	8.38721	4.16712	3.58488	6.86314	7.32283	6.28899	2.63741	TRUE	FALSE
M01723	IGDB16752	Tcf3	12.5727	0.114128	10.017	28.8496	3.11951	2.50876	6.03935	3.21098	0.685842	1.53606	TRUE	FALSE
M01737	IGDB26353	Figla	14.15	0.312002	135.412	5.33173	3.26789	2.61738	5.81537	3.3049	1.85096	1.38153	TRUE	FALSE
M01744	IGDB24578	Tcfl5	12.7103	-2.90348	25.6358	7.25776	7.877	6.84987	9.6877	8.24361	0.436374	4.85986	TRUE	FALSE
M01751	IGDB23823	arntl2	11.0188	-4.81807	23.5587	20.0742	6.11377	5.1398	7.53859	6.01265	5.19018	3.25133	TRUE	FALSE
M01751	IGDB23310	arntl1a	11.0188	-4.81807	20.5601	17.9735	6.11377	5.1398	7.53859	6.01265	5.19018	3.25133	TRUE	FALSE
M01808	IGDB19349	atf2	14.3276	-9.04762	11.5809	8.29514	4.27476	3.11975	7.71932	6.71256	5.93039	2.25652	TRUE	FALSE
M01823	IGDB22575	atf7b	14.6415	-8.97149	15.8273	7.10417	4.27135	2.95194	8.37519	7.15659	6.22609	2.83566	TRUE	FALSE
M02752	IGDB15656	eomesb	18.3445	11.1654	247.173	1.08145	3.41336	2.13072	6.39533	3.10799	0.0736436	0.750311	TRUE	FALSE
M02930	IGDB24408	Klf14	11.8336	0.785559	6.5267	50.093	5.29992	4.48571	10.5956	10.9688	11.0117	6.94914	TRUE	FALSE
M03071	IGDB19798	grhl1	37.3627	-2.93363	92.2508	62.1984	5.76252	2.48552	5.30303	3.98299	1.44034	1.51861	TRUE	FALSE
M03682	IGDB00191	Sp6	12.6924	-2.31742	26.6957	1.3254	5.57533	4.37399	8.4203	8.7434	6.05073	4.84493	TRUE	FALSE
M04400	IGDB16369	KLF6	15.3377	-1.49665	81.6038	12.1203	5.38664	3.84532	9.43774	8.4059	2.99028	4.67941	TRUE	FALSE
M04410	IGDB15140	pibf1	15.0596	1.01562	8.2262	9.92342	5.38721	4.15707	9.65637	8.64186	6.0361	4.03529	TRUE	FALSE
M04418	IGDB11196	klf3	14.6698	-2.35313	18.0981	7.67869	5.44232	4.09701	9.53156	8.89325	8.58858	6.08588	TRUE	FALSE
M04455	IGDB16993	klf2b	15.205	1.40013	113.226	30.4967	5.62835	4.38993	9.72394	8.79893	1.37364	6.8469	TRUE	FALSE
M04455	IGDB16656	klf17	15.205	1.40013	375.75	41.6048	5.62835	4.38993	9.72394	8.79893	1.37364	6.8469	TRUE	FALSE
M04463	IGDB13108	KLF4	14.3786	0.353705	8.36587	3.77405	4.66225	3.30604	9.57707	7.82927	1.22331	5.47251	TRUE	FALSE
M08032	IGDB13298	Pou5f1	26.933	5.24446	1175.01	19.1245	3.99835	1.82924	5.66993	2.35466	3.02457	0.697855	TRUE	FALSE
M08033	IGDB13298	Pou5f1	36.5434	5.37139	1175.01	19.1245	2.98694	0.635549	5.15099	2.60185	1.72443	0.0195262	TRUE	FALSE
M08983	IGDB11687	rest	10.2303	4.44461	59.0347	27.1542	3.81798	3.17711	4.8065	4.97526	3.3874	2.79512	TRUE	FALSE
M09002	IGDB24486	Snai1	16.2678	6.59501	1497.25	54.4452	4.22854	3.1836	5.90364	3.68237	1.93906	2.01675	TRUE	FALSE
M09126	IGDB15524	grhl2a	20.0105	-0.759039	35.0285	9.86561	2.94092	1.87356	4.79022	2.98224	-0.00139104	0.615371	TRUE	FALSE
M09225	IGDB13298	Pou5f1	32.1197	5.61428	1175.01	19.1245	3.8353	1.13851	5.84799	2.89715	3.68765	0.438039	TRUE	FALSE
M00137	IGDB18790	zic1	5.4207	10.7929	6.3793	18.3933	5.64575	5.51876	7.37897	4.92234	3.65257	4.03383	FALSE	TRUE
M00139	IGDB25065	znf281a	-1.33571	16.9906	56.23	21.9127	5.10111	5.08379	8.35089	4.0125	3.99084	3.30436	FALSE	TRUE
M00139	IGDB17678	znf281b	-1.33571	16.9906	108.226	40.0185	5.10111	5.08379	8.35089	4.0125	3.99084	3.30436	FALSE	TRUE
M00143	IGDB24439	znf740b	-11.7453	13.1371	132.653	52.8783	3.64353	3.79282	7.04459	3.08919	2.38501	2.40408	FALSE	TRUE
M00150	IGDB19066	zic2b	2.92717	11.1353	226.807	65.2898	5.63418	5.62249	7.72413	5.25984	4.75712	4.20556	FALSE	TRUE
M00151	IGDB11816	zic3	6.03035	11.4997	12.5773	23.88	5.32573	5.22151	7.31373	5.65603	3.91041	4.24565	FALSE	TRUE
M00165	IGDB16933	gata6	-1.38504	14.1633	57.6098	106.982	2.30978	3.13804	5.12963	3.33954	1.27324	1.0422	FALSE	TRUE
M00181	IGDB22474	rxrgb	-10.2261	16.1989	5.72951	45.5934	3.22389	4.12746	5.90822	3.73287	1.34496	1.81483	FALSE	TRUE
M00184	IGDB16144	nr2f5	-7.87491	12.8259	1.35236	99.5513	2.77284	3.43703	5.77248	3.52228	0.693683	1.23482	FALSE	TRUE
M00249	IGDB23868	wt1	-6.60989	10.7163	1.39775	6.43871	6.41378	6.43087	8.68014	5.96451	6.54168	4.79504	FALSE	TRUE
M00313	IGDB11709	pitx2	1.63764	13.6454	20.5397	5.36389	2.99192	3.36722	5.23073	2.85485	-0.31765	0.591989	FALSE	TRUE
M00313	IGDB14886	pitx3	1.63764	13.6454	8.84054	8.23324	2.99192	3.36722	5.23073	2.85485	-0.31765	0.591989	FALSE	TRUE
M00393	IGDB25666	eve1	4.82407	10.444	13.5086	14.1274	2.97743	2.99612	5.74693	2.81992	-0.173384	0.605656	FALSE	TRUE
M00396	IGDB14993	otx1	0.962613	11.2029	92.5968	36.7119	2.24456	2.8888	5.06265	2.79443	0.0353502	0.534026	FALSE	TRUE
M00396	IGDB11082	otx2a	0.962613	11.2029	44.4051	53.759	2.24456	2.8888	5.06265	2.79443	0.0353502	0.534026	FALSE	TRUE
M00411	IGDB06230	gsc	1.96621	10.8515	11.0188	12.2372	3.8385	4.49569	5.92087	4.04193	1.59071	1.27942	FALSE	TRUE
M00418	IGDB19857	Otx2	0.946266	10.9392	1.44551	16.9665	2.46594	2.94946	5.5122	2.80936	-0.315963	0.46577	FALSE	TRUE
M00426	IGDB01629	rx3	-2.41082	12.5273	3.28536	9.03167	1.72111	2.8906	4.45414	2.90168	0.245842	0.783269	FALSE	TRUE
M00426	IGDB16990	rx2	-2.41082	12.5273	1.85516	5.75894	1.72111	2.8906	4.45414	2.90168	0.245842	0.783269	FALSE	TRUE
M00441	IGDB07779	zgc:101100	0.791273	14.319	3.58625	5.44622	3.33519	3.91725	5.42241	3.22555	0.571732	0.979283	FALSE	TRUE
M00441	IGDB16506	dmbx1b	0.791273	14.319	15.0043	25.0659	3.33519	3.91725	5.42241	3.22555	0.571732	0.979283	FALSE	TRUE
M00441	IGDB22469	dmbx1a	0.791273	14.319	88.1766	17.1608	3.33519	3.91725	5.42241	3.22555	0.571732	0.979283	FALSE	TRUE
M00442	IGDB01541	pnx	-2.14753	13.9622	1.19201	9.57161	2.36083	3.02439	4.80352	3.32691	0.249693	1.07179	FALSE	TRUE
M00770	IGDB17115	Zfp202	-7.80917	15.0155	72.671	25.2509	4.49799	4.95057	6.82846	3.00629	1.41341	2.34058	FALSE	TRUE
M00770	IGDB24848	Zfp202	-7.80917	15.0155	27.3054	13.4809	4.49799	4.95057	6.82846	3.00629	1.41341	2.34058	FALSE	TRUE
M00799	IGDB08886	gata5	-0.701152	14.0685	4.12543	9.16408	2.38305	3.38935	4.56807	3.43562	2.38148	1.19084	FALSE	TRUE
M00799	IGDB20990	gata4	-0.701152	14.0685	47.1028	179.679	2.38305	3.38935	4.56807	3.43562	2.38148	1.19084	FALSE	TRUE
M00810	IGDB24427	rarga	-10.7564	10.5998	17.3557	29.0808	2.28026	3.26224	5.38431	3.8302	0.67983	0.974101	FALSE	TRUE
M00810	IGDB23152	rargb	-10.7564	10.5998	12.2548	23.013	2.28026	3.26224	5.38431	3.8302	0.67983	0.974101	FALSE	TRUE
M00822	IGDB26149	nr2f1a	-7.87491	12.8259	11.413	7.49928	3.73021	4.2738	6.20873	3.75196	1.48925	1.52979	FALSE	TRUE
M00822	IGDB23746	nr2f2	-7.87491	12.8259	7.05796	12.9221	3.73021	4.2738	6.20873	3.75196	1.48925	1.52979	FALSE	TRUE
M00834	IGDB13174	tbx3a	13.4073	13.4878	2.81106	19.145	3.78769	2.78659	5.70399	2.99487	-0.462162	0.780644	FALSE	TRUE
M01022	IGDB08126	gli1	-1.30816	12.9744	1.8977	13.7895	4.1718	4.44765	6.71983	3.57557	1.73927	2.26578	FALSE	TRUE
M01024	IGDB05194	gli2b	2.81523	11.7991	1.47749	34.1991	3.65855	4.18692	6.31369	3.56733	1.69475	1.96303	FALSE	TRUE
M01026	IGDB12866	sox4a	9.18423	20.6255	11.9724	9.62648	2.78646	2.52049	5.0865	3.05026	0.67903	0.615323	FALSE	TRUE
M01172	IGDB14565	Vezf1	-9.97088	11.4478	23.6504	17.0236	4.41259	5.13327	7.48273	3.14066	1.40378	2.35385	FALSE	TRUE
M01172	IGDB14097	Vezf1	-9.97088	11.4478	57.9227	42.0875	4.41259	5.13327	7.48273	3.14066	1.40378	2.35385	FALSE	TRUE
M01323	IGDB24453	tead3a	-8.43591	10.4527	76.1925	49.2878	1.92182	3.00294	4.84347	3.6495	1.38733	1.19108	FALSE	TRUE
M02396	IGDB16515	NR2F6	-5.88392	20.8213	138.353	103.932	3.53293	4.52348	6.44046	3.3068	1.69933	2.52471	FALSE	TRUE
M02396	IGDB22135	NR2F6	-5.88392	20.8213	7.05305	24.471	3.53293	4.52348	6.44046	3.3068	1.69933	2.52471	FALSE	TRUE
M02402	IGDB12559	rxrba	-5.2069	13.4044	10.0235	12.5189	3.59315	4.29302	6.11595	3.87101	2.37714	1.91203	FALSE	TRUE
M02495	IGDB14080	TBX2	10.5796	12.2896	1.72648	34.7661	4.33471	3.34365	6.00437	3.2969	0.18454	1.04807	FALSE	TRUE
M02716	IGDB25282	sox9	6.89447	21.9298	2.39343	31.9667	3.30043	3.46846	4.72113	3.27892	0.255633	0.365544	FALSE	TRUE
M02821	IGDB06206	Mga	16.8019	12.8638	3.96528	6.46814	3.67652	2.6176	6.12601	3.18599	0.349182	1.53602	FALSE	TRUE
M03369	IGDB17631	ENSORLG00000004373	-2.70883	11.0679	18.0316	24.6105	1.78451	2.61767	4.18762	2.52132	0.772799	0.308329	FALSE	TRUE
M03407	IGDB24541	nr2c2	-10.802	24.925	14.8796	12.038	3.47985	4.92933	5.95923	4.27231	2.55538	1.43214	FALSE	TRUE
M03668	IGDB11815	zic6	-1.05606	14.5059	2.72754	6.27081	5.62929	5.69341	8.2215	6.3578	5.11342	5.87959	FALSE	TRUE
M04471	IGDB19068	zic5	6.0673	14.9706	13.8173	23.9039	5.51621	5.58911	6.99488	6.28307	5.06179	5.06739	FALSE	TRUE
M05581	IGDB24370	ppard	-10.8963	24.3924	30.3973	15.5899	3.30616	5.01191	5.87521	4.18499	2.31569	0.956602	FALSE	TRUE
M05581	IGDB23513	pparaa	-10.8963	24.3924	6.87374	11.2416	3.30616	5.01191	5.87521	4.18499	2.31569	0.956602	FALSE	TRUE
M05581	IGDB20233	ppara	-10.8963	24.3924	29.9007	12.177	3.30616	5.01191	5.87521	4.18499	2.31569	0.956602	FALSE	TRUE
M05805	IGDB04756	Tbx6	17.707	14.4977	1.04344	9.44561	3.67696	2.54012	6.37596	3.09814	-0.0972176	1.3861	FALSE	TRUE
M08024	IGDB22407	Bcl6	-23.2408	14.2038	5.73339	7.05103	2.37045	4.23366	6.56732	2.32445	-0.585393	1.51915	FALSE	TRUE
M08734	IGDB11130	tal1	-3.42597	10.0735	1.02358	6.59274	3.17063	3.88276	5.89807	4.19167	3.40484	2.1819	FALSE	TRUE
M08979	IGDB24755	Sall4	-7.72619	11.7649	253.392	75.1526	4.76723	4.86221	8.00833	4.4669	3.75503	3.91159	FALSE	TRUE
M08988	IGDB17719	Maz	-14.025	14.6906	43.1218	25.0117	4.22698	4.67346	8.85232	5.31544	4.41796	4.83015	FALSE	TRUE
M09016	IGDB19327	sp5a	-12.713	16.7867	7.81953	9.88584	3.78857	4.00505	9.14319	6.43197	5.37338	5.30023	FALSE	TRUE
M09403	IGDB00224	Sox10	-2.4257	15.512	1.06648	10.9379	1.34808	2.52926	4.28288	2.4296	-0.458963	0.31967	FALSE	TRUE
M09465	IGDB16752	Tcf3	1.01065	12.6625	10.017	28.8496	2.05172	2.64268	4.73517	3.46128	0.261214	1.47351	FALSE	TRUE
M09569	IGDB19857	Otx2	2.20711	15.5028	1.44551	16.9665	3.02082	3.30525	5.05672	3.25756	0.666573	0.920254	FALSE	TRUE
M00111	IGDB21038	tfap2d	-3.08493	7.29395	5.46781	1.78595	4.14924	4.80224	7.31528	5.20782	4.13889	4.97482	FALSE	FALSE
M00111	IGDB22850	tfap2c	-3.08493	7.29395	68.0201	30.8685	4.14924	4.80224	7.31528	5.20782	4.13889	4.97482	FALSE	FALSE
M00111	IGDB18661	tfap2a	-3.08493	7.29395	139.217	133.734	4.14924	4.80224	7.31528	5.20782	4.13889	4.97482	FALSE	FALSE
M00112	IGDB21037	ENSORLG00000017695	-1.77593	10.0056	2.56573	1.26756	3.8667	4.3716	6.82789	4.30752	3.07588	3.65357	FALSE	FALSE
M00115	IGDB21747	ENSORLG00000014769	-0.658053	2.49776	14.615	24.9594	-1.51245	-1.15655	2.0576	1.33063	-2.90495	-0.695581	FALSE	FALSE
M00115	IGDB23598	arid3b	-0.658053	2.49776	44.4458	31.9379	-1.51245	-1.15655	2.0576	1.33063	-2.90495	-0.695581	FALSE	FALSE
M00115	IGDB22096	arid3a	-0.658053	2.49776	10.8473	36.3184	-1.51245	-1.15655	2.0576	1.33063	-2.90495	-0.695581	FALSE	FALSE
M00115	IGDB10222	ENSORLG00000017354	-0.658053	2.49776	4.38621	1.18891	-1.51245	-1.15655	2.0576	1.33063	-2.90495	-0.695581	FALSE	FALSE
M00118	IGDB16752	Tcf3	6.6905	-1.16641	10.017	28.8496	3.56399	2.7967	5.85269	3.71205	1.54198	2.13087	FALSE	FALSE
M00119	IGDB23123	dec1b	7.43883	-4.13894	6.47735	16.3942	5.5777	4.72512	7.69003	5.29959	4.28978	3.29936	FALSE	FALSE
M00119	IGDB23065	bhlhe40	7.43883	-4.13894	29.1607	19.3139	5.5777	4.72512	7.69003	5.29959	4.28978	3.29936	FALSE	FALSE
M00120	IGDB06707	myf6	-3.84442	-6.15135	1.05849	1.07946	2.98454	2.47212	5.57721	2.83645	1.33133	1.00903	FALSE	FALSE
M00121	IGDB19892	MAX	1.42946	-3.16022	35.0135	55.8654	4.79145	4.25181	7.51381	4.63337	2.79282	2.27114	FALSE	FALSE
M00121	IGDB20587	max	1.42946	-3.16022	77.2898	85.0414	4.79145	4.25181	7.51381	4.63337	2.79282	2.27114	FALSE	FALSE
M00125	IGDB20999	jdp2b	13.2963	-6.65696	2.7551	13.5287	4.86134	3.69731	7.45518	5.98197	4.86075	2.59927	FALSE	FALSE
M00125	IGDB06338	jdp2a	13.2963	-6.65696	2.36933	4.01484	4.86134	3.69731	7.45518	5.98197	4.86075	2.59927	FALSE	FALSE
M00126	IGDB08278	mafbb	-1.81173	2.92556	10.756	32.8176	2.1298	2.30476	5.27378	2.79682	0.159576	0.648454	FALSE	FALSE
M00128	IGDB17245	Bcl6b	-1.42494	-2.55515	1.08554	1.72318	-0.197918	0.0534477	3.10393	1.73046	-1.03116	-0.712598	FALSE	FALSE
M00128	IGDB16324	bcl6ab	-1.42494	-2.55515	7.06657	4.66437	-0.197918	0.0534477	3.10393	1.73046	-1.03116	-0.712598	FALSE	FALSE
M00129	IGDB00406	Glis2	-2.68349	16.5708	2.87682	1.47702	4.40744	4.56451	7.06902	3.91748	1.57131	2.49355	FALSE	FALSE
M00129	IGDB09507	Glis2	-2.68349	16.5708	1.06657	2.50676	4.40744	4.56451	7.06902	3.91748	1.57131	2.49355	FALSE	FALSE
M00130	IGDB24848	Plagl1	-6.39789	6.70558	27.3054	13.4809	4.54206	4.82557	7.54704	4.93451	3.16918	4.16428	FALSE	FALSE
M00130	IGDB08885	Plagl1	-6.39789	6.70558	3.66729	3.57099	4.54206	4.82557	7.54704	4.93451	3.16918	4.16428	FALSE	FALSE
M00134	IGDB18326	Klf7	14.7154	-2.11677	1.14236	1.34441	4.48874	3.5212	10.2837	11.6343	11.384	7.5254	FALSE	FALSE
M00134	IGDB19032	klf7b	14.7154	-2.11677	1.01165	1.43215	4.48874	3.5212	10.2837	11.6343	11.384	7.5254	FALSE	FALSE
M00135	IGDB15846	zbtb7b	-7.06569	16.9039	7.67971	3.3069	4.75728	5.09893	7.27532	3.83122	1.27424	3.23086	FALSE	FALSE
M00136	IGDB16003	MTF1	-2.37341	-8.47263	15.7543	8.7248	4.0894	3.70655	5.07295	3.54409	3.82514	2.25949	FALSE	FALSE
M00138	IGDB00286	Egr1	0.343625	2.22603	1.0636	1.03212	5.77662	5.37974	8.51316	9.55494	9.82936	6.02289	FALSE	FALSE
M00140	IGDB20621	Zfp410	1.42959	3.94325	23.1432	23.8872	2.92437	2.83368	6.34105	3.21539	1.4582	1.57353	FALSE	FALSE
M00144	IGDB19609	osr1	1.53361	0.83751	2.32594	1.30825	1.74588	1.60243	4.96218	2.65256	0.0449153	0.873869	FALSE	FALSE
M00145	IGDB05400	Zbtb14	9.769	-5.39941	28.4917	24.0727	8.79882	7.79942	10.64	10.4171	8.66402	7.58161	FALSE	FALSE
M00146	IGDB01189	Zbtb12	0.559405	-1.17683	29.6848	15.2689	1.58498	1.15018	4.04893	2.2241	-1.18939	-0.100762	FALSE	FALSE
M00152	IGDB00758	zbtb3	-5.55159	0.0875728	6.3293	2.44846	2.57235	2.62942	4.67998	2.60426	0.00685757	0.890895	FALSE	FALSE
M00153	IGDB15630	E2f3	5.81517	-2.49247	127.767	44.3995	5.20145	4.63355	8.39711	7.57836	3.85474	6.24853	FALSE	FALSE
M00153	IGDB12865	e2f3	5.81517	-2.49247	67.1977	55.2822	5.20145	4.63355	8.39711	7.57836	3.85474	6.24853	FALSE	FALSE
M00154	IGDB19762	si:ch211-160f23.5	5.07918	-2.7862	9.36712	6.17465	5.14255	4.55922	8.14159	7.15888	3.40641	5.99472	FALSE	FALSE
M00155	IGDB23626	spi1a	3.30838	1.29812	1.33134	1	2.34285	2.37009	5.30325	3.76107	-1.28687	0.600477	FALSE	FALSE
M00155	IGDB07351	spi1b	3.30838	1.29812	1	3.10545	2.34285	2.37009	5.30325	3.76107	-1.28687	0.600477	FALSE	FALSE
M00156	IGDB23015	elf3	5.12399	-2.6772	8.03222	3.21636	2.75681	2.53723	5.63817	5.01236	2.65884	0.273371	FALSE	FALSE
M00160	IGDB22764	Foxj3	6.74071	3.09448	4.78309	2.84136	1.10251	0.878558	3.48394	1.73194	0.150861	0.0170355	FALSE	FALSE
M00160	IGDB24289	FOXJ3	6.74071	3.09448	10.5091	3.02597	1.10251	0.878558	3.48394	1.73194	0.150861	0.0170355	FALSE	FALSE
M00162	IGDB19955	foxa2	7.19687	2.83826	6.51385	50.2481	1.32239	1.18034	3.76049	2.42518	-0.23436	0.316865	FALSE	FALSE
M00163	IGDB11386	foxk1	8.70822	3.50142	27.9549	23.7348	1.25742	0.818783	3.48997	2.42755	-0.286585	0.0159643	FALSE	FALSE
M00166	IGDB22916	gata2a	-1.38542	14.6819	126.248	120.571	0.866934	1.8189	3.88585	2.96802	0.968568	0.519485	FALSE	FALSE
M00166	IGDB20519	gata3	-1.38542	14.6819	6.14555	39.964	0.866934	1.8189	3.88585	2.96802	0.968568	0.519485	FALSE	FALSE
M00169	IGDB06307	six6a	2.05664	1.1249	1.32288	1.24389	NA	NA	NA	NA	NA	NA	FALSE	FALSE
M00170	IGDB26181	nkx3-1	3.15638	6.08196	6.00853	9.66206	2.21237	1.79423	4.18891	2.2979	-0.48832	0.188856	FALSE	FALSE
M00172	IGDB12486	hoxa3a	2.23538	12.8858	6.3416	31.7112	0.856619	1.22334	3.73655	1.94743	-1.48337	-0.360628	FALSE	FALSE
M00172	IGDB04945	ENSORLG00000012375	2.23538	12.8858	2.44331	8.64856	0.856619	1.22334	3.73655	1.94743	-1.48337	-0.360628	FALSE	FALSE
M00173	IGDB18920	irf9	5.88109	-2.69375	3.19176	1.1828	1.52733	0.931182	3.80745	2.64874	-0.254233	-0.31957	FALSE	FALSE
M00174	IGDB17739	Irf3	0.000167912	-1.53014	15.9982	3.24142	0.999893	0.994855	4.4232	1.92523	-1.05118	-0.0779559	FALSE	FALSE
M00178	IGDB15403	SRF	0.146642	-3.73635	54.7911	40.3362	4.08664	3.41356	3.44472	2.18725	-0.389284	0.0744997	FALSE	FALSE
M00179	IGDB20924	myb	4.18801	-0.331498	4.63842	10.4038	3.00941	2.29108	5.94158	3.17989	1.80576	2.45176	FALSE	FALSE
M00179	IGDB18730	mybl1	4.18801	-0.331498	23.397	8.9002	3.00941	2.29108	5.94158	3.17989	1.80576	2.45176	FALSE	FALSE
M00181	IGDB01784	rxraa	-10.2261	16.1989	1.0806	4.20303	3.22389	4.12746	5.90822	3.73287	1.34496	1.81483	FALSE	FALSE
M00182	IGDB24768	hnf4a	-3.91253	8.94548	16.8207	38.3799	2.43552	3.03339	4.65775	2.69318	-0.127077	0.611737	FALSE	FALSE
M00183	IGDB20936	errg2	-5.82222	3.30439	11.4379	4.02015	1.3257	1.1694	4.55533	2.54456	0.152751	0.350298	FALSE	FALSE
M00184	IGDB21754	Nr2f2	-7.87491	12.8259	18.6931	1.61645	2.77284	3.43703	5.77248	3.52228	0.693683	1.23482	FALSE	FALSE
M00185	IGDB16158	RARB	-8.32579	9.09035	1.21963	4.52256	2.94602	3.23512	5.51011	3.5734	1.00721	1.39805	FALSE	FALSE
M00185	IGDB12639	RARB	-8.32579	9.09035	1.49806	2.17295	2.94602	3.23512	5.51011	3.5734	1.00721	1.39805	FALSE	FALSE
M00186	IGDB23826	rfx4	-10.0235	-1.66758	1.66501	47.36	1.437	2.03552	5.85157	4.84871	2.43851	2.8472	FALSE	FALSE
M00187	IGDB23616	rfx7a	-7.23982	-0.743797	2.22328	7.81145	2.12305	2.27992	5.56185	5.25856	2.998	2.59501	FALSE	FALSE
M00187	IGDB21515	rfx7	-7.23982	-0.743797	1.06969	1.33634	2.12305	2.27992	5.56185	5.25856	2.998	2.59501	FALSE	FALSE
M00190	IGDB12633	gmeb1	9.8753	-6.75918	33.1589	32.9133	2.88108	1.67319	5.77366	4.00679	1.47524	1.05637	FALSE	FALSE
M00190	IGDB03074	Gmeb1	9.8753	-6.75918	1	1.24336	2.88108	1.67319	5.77366	4.00679	1.47524	1.05637	FALSE	FALSE
M00192	IGDB13343	ENSORLG00000011834	-2.78938	-0.831117	70.6905	14.6694	1.82784	1.99186	4.74938	2.61194	0.132305	0.23576	FALSE	FALSE
M00192	IGDB21297	smad3a	-2.78938	-0.831117	1.78061	5.69838	1.82784	1.99186	4.74938	2.61194	0.132305	0.23576	FALSE	FALSE
M00192	IGDB23672	smad3b	-2.78938	-0.831117	6.75691	5.15547	1.82784	1.99186	4.74938	2.61194	0.132305	0.23576	FALSE	FALSE
M00194	IGDB20184	ENSORLG00000009474	3.42328	8.0829	6.7623	11.6878	NA	NA	NA	NA	NA	NA	FALSE	FALSE
M00194	IGDB23579	hbp1	3.42328	8.0829	64.7214	28.827	NA	NA	NA	NA	NA	NA	FALSE	FALSE
M00197	IGDB25286	sox8	3.50205	12.9276	2.16378	4.07227	-2.17307	-1.70033	2.55478	1.78067	-1.63845	-0.717721	FALSE	FALSE
M00198	IGDB17806	ENSORLG00000008387	1.31274	14.4968	2.06898	6.70916	1.64637	1.76663	5.16142	3.25814	-0.0207548	1.05855	FALSE	FALSE
M00198	IGDB01511	tcf7l1a	1.31274	14.4968	42.5662	18.7617	1.64637	1.76663	5.16142	3.25814	-0.0207548	1.05855	FALSE	FALSE
M00198	IGDB26206	tcf7l1	1.31274	14.4968	132.517	83.7609	1.64637	1.76663	5.16142	3.25814	-0.0207548	1.05855	FALSE	FALSE
M00199	IGDB05603	sox32	-1.8241	2.55535	46.7027	65.5218	0.268772	0.609875	4.17814	2.38554	-0.222727	-0.12681	FALSE	FALSE
M00199	IGDB05604	sox17	-1.8241	2.55535	6.98111	30.3025	0.268772	0.609875	4.17814	2.38554	-0.222727	-0.12681	FALSE	FALSE
M00200	IGDB11273	lef1	1.69287	14.8765	6.00599	25.1369	1.58113	1.9391	5.22077	3.16854	0.0281393	1.03943	FALSE	FALSE
M00203	IGDB20156	sox5	5.04985	13.9099	1.6191	9.55407	0.660757	0.921955	3.51995	2.63398	-0.644954	-0.3308	FALSE	FALSE
M00204	IGDB09196	Sox18	3.50205	12.9276	1.24358	1.02894	-2.04158	-1.54562	2.39668	1.77967	-1.63845	-0.621906	FALSE	FALSE
M00206	IGDB21911	sox14	3.50205	12.9276	11.2657	2.72868	-2.17112	-1.69512	2.55466	1.78067	-1.63845	-0.68679	FALSE	FALSE
M00208	IGDB11825	sox2	4.40292	13.2427	106.944	98.6966	0.119544	0.519649	3.02279	2.07096	-1.70535	-0.483169	FALSE	FALSE
M00209	IGDB20910	sox7	3.50205	12.9276	1.30251	5.74092	-2.08758	-1.59502	2.49019	1.71438	-1.63845	-0.70549	FALSE	FALSE
M00210	IGDB19787	sox11a	5.57187	13.0202	179.281	62.5464	0.555668	0.9999	3.38267	2.42815	-1.29059	-0.334367	FALSE	FALSE
M00212	IGDB23053	sox13	2.89425	6.12253	1.09281	8.66595	0.0498376	0.313859	3.24403	2.15993	-1.20691	-0.433536	FALSE	FALSE
M00214	IGDB05807	sox1	-1.6429	0.321285	1.31512	7.5715	-1.19313	-0.979187	3.16147	1.31134	-1.66514	-0.740414	FALSE	FALSE
M00215	IGDB04939	tbx21	19.28	12.8631	1.16914	2.51463	3.74537	2.50731	5.85413	2.93368	-0.0625613	0.622471	FALSE	FALSE
M00220	IGDB16899	snai2	4.39321	-0.498905	1.43576	46.0517	3.16729	2.5294	5.79472	2.77591	-0.0805223	1.26182	FALSE	FALSE
M00233	IGDB02834	egr2b	4.51454	0.282929	1.62198	2.53632	5.7056	5.27431	7.98612	8.29231	9.61051	5.4757	FALSE	FALSE
M00233	IGDB18075	egr2b	4.51454	0.282929	1.64995	17.8583	5.7056	5.27431	7.98612	8.29231	9.61051	5.4757	FALSE	FALSE
M00238	IGDB07875	gfi1ab	-4.73453	-2.05839	2.66263	8.91978	0.882262	0.999812	4.51399	2.57868	-0.926741	0.0743018	FALSE	FALSE
M00238	IGDB03669	gfi1aa	-4.73453	-2.05839	1.7134	3.5326	0.882262	0.999812	4.51399	2.57868	-0.926741	0.0743018	FALSE	FALSE
M00240	IGDB13440	gfi1b	-5.58661	-5.64429	1.07691	2.10486	0.176212	0.884324	3.74292	2.20181	-0.464027	-0.285128	FALSE	FALSE
M00241	IGDB19797	KLF11	6.08552	2.00566	40.2117	8.4194	6.22836	6.1223	9.83231	10.223	9.8766	7.81112	FALSE	FALSE
M00241	IGDB21110	KLF11	6.08552	2.00566	75.753	13.9168	6.22836	6.1223	9.83231	10.223	9.8766	7.81112	FALSE	FALSE
M00249	IGDB21568	wt1	-6.60989	10.7163	2.10794	1.02696	6.41378	6.43087	8.68014	5.96451	6.54168	4.79504	FALSE	FALSE
M00257	IGDB16881	foxc1a	-4.31009	-5.01849	1.36648	21.3045	-1.07523	-1.09488	2.08299	1.10419	-2.72121	-0.642941	FALSE	FALSE
M00257	IGDB22265	foxc1	-4.31009	-5.01849	1.4272	14.6681	-1.07523	-1.09488	2.08299	1.10419	-2.72121	-0.642941	FALSE	FALSE
M00264	IGDB05528	arx	-3.90001	12.7568	3.69872	2.54294	2.47306	3.27243	4.85111	3.1028	0.70259	1.13203	FALSE	FALSE
M00282	IGDB11667	phox2bb	0.0772035	13.8846	1.90456	2.55786	-0.289165	0.441078	2.38293	1.56462	-1.86064	-0.339929	FALSE	FALSE
M00282	IGDB13953	phox2a	0.0772035	13.8846	2.04454	2.99295	-0.289165	0.441078	2.38293	1.56462	-1.86064	-0.339929	FALSE	FALSE
M00284	IGDB02784	vax1	3.16561	10.7602	1.00831	1.52248	2.55651	2.86003	4.85621	2.89812	-0.0530185	1.08192	FALSE	FALSE
M00284	IGDB17314	vax2	3.16561	10.7602	1.53268	1.94909	2.55651	2.86003	4.85621	2.89812	-0.0530185	1.08192	FALSE	FALSE
M00287	IGDB15014	vsx1	-1.49515	13.8643	17.4804	1.38745	-0.15839	0.409586	3.12576	1.36362	-1.8015	-0.171753	FALSE	FALSE
M00290	IGDB15284	msx1b	-6.54687	8.40145	1.71757	7.29636	0.770562	1.44252	3.27902	2.64009	-0.995939	-0.15719	FALSE	FALSE
M00290	IGDB00599	msx3	-6.54687	8.40145	2.11124	13.4154	0.770562	1.44252	3.27902	2.64009	-0.995939	-0.15719	FALSE	FALSE
M00290	IGDB14257	msx2b	-6.54687	8.40145	28.0834	20.412	0.770562	1.44252	3.27902	2.64009	-0.995939	-0.15719	FALSE	FALSE
M00290	IGDB23245	MSX2	-6.54687	8.40145	12.0869	81.6276	0.770562	1.44252	3.27902	2.64009	-0.995939	-0.15719	FALSE	FALSE
M00302	IGDB06142	nkx2.2b	-0.243735	-0.0323776	1.3018	8.50395	1.53177	1.40291	4.15892	2.28374	-0.370954	0.208615	FALSE	FALSE
M00317	IGDB02793	ENSORLG00000001430	-5.37635	6.72432	1	1	-1.47582	-0.910931	1.50143	1.32322	-2.03331	-0.74463	FALSE	FALSE
M00323	IGDB12087	nkx2-5	2.10088	5.34323	1.09226	3.68566	2.11301	1.66474	3.79245	1.85368	-1.08756	-0.0459981	FALSE	FALSE
M00330	IGDB24436	hoxc4	-0.799919	10.8268	1.73276	12.6882	-2.12704	-1.96231	1.64696	1.24715	-2.47869	-1.02625	FALSE	FALSE
M00342	IGDB21569	pax6b	2.77044	7.55062	1.60066	38.2509	0.807508	0.93486	3.18601	1.61548	-1.70614	-0.228149	FALSE	FALSE
M00342	IGDB08490	ENSORLG00000000847	2.77044	7.55062	6.99087	2.90589	0.807508	0.93486	3.18601	1.61548	-1.70614	-0.228149	FALSE	FALSE
M00358	IGDB13885	PAX3	4.98885	8.83553	2.05543	23.7944	NA	NA	NA	NA	NA	NA	FALSE	FALSE
M00358	IGDB16802	PAX3	4.98885	8.83553	2.14287	44.5054	NA	NA	NA	NA	NA	NA	FALSE	FALSE
M00363	IGDB18850	Pou6f2	-0.00504884	7.80701	3.69208	1.18779	NA	NA	NA	NA	NA	NA	FALSE	FALSE
M00368	IGDB23829	nr1h4	-8.12947	12.8931	1	1.8508	2.37287	3.2937	5.35255	2.8515	-0.00924626	0.715653	FALSE	FALSE
M00373	IGDB08624	nr2e3	6.31801	5.86048	1.25388	1.02264	0.244386	0.306879	4.0581	2.22535	-2.26046	-0.403015	FALSE	FALSE
M00373	IGDB07195	NR2E3	6.31801	5.86048	1.41724	1.09119	0.244386	0.306879	4.0581	2.22535	-2.26046	-0.403015	FALSE	FALSE
M00375	IGDB11998	egr1	-0.345347	1.94405	1.39096	5.93996	5.58056	5.42922	7.74406	7.44348	5.99803	4.52043	FALSE	FALSE
M00375	IGDB00286	Egr1	-0.345347	1.94405	1.0636	1.03212	5.58056	5.42922	7.74406	7.44348	5.99803	4.52043	FALSE	FALSE
M00380	IGDB22128	lhx9	-2.04705	12.0185	1.41574	3.00669	-0.204725	0.498765	3.32422	1.48433	-2.02767	-0.191348	FALSE	FALSE
M00380	IGDB26414	lhx2b	-2.04705	12.0185	1.22446	9.72258	-0.204725	0.498765	3.32422	1.48433	-2.02767	-0.191348	FALSE	FALSE
M00381	IGDB04948	hoxb6a	4.84139	4.95074	4.42615	3.9279	NA	NA	NA	NA	NA	NA	FALSE	FALSE
M00381	IGDB09749	ENSORLG00000017036	4.84139	4.95074	1.05928	7.47943	NA	NA	NA	NA	NA	NA	FALSE	FALSE
M00382	IGDB03268	hoxa10b	-4.00388	7.46781	1.7317	4.22693	NA	NA	NA	NA	NA	NA	FALSE	FALSE
M00382	IGDB12488	ENSORLG00000005034	-4.00388	7.46781	3.38346	7.92784	NA	NA	NA	NA	NA	NA	FALSE	FALSE
M00382	IGDB05972	hoxd10a	-4.00388	7.46781	1.09213	5.62286	NA	NA	NA	NA	NA	NA	FALSE	FALSE
M00382	IGDB08999	hoxc10a	-4.00388	7.46781	2.64175	1.87038	NA	NA	NA	NA	NA	NA	FALSE	FALSE
M00383	IGDB14896	ENSORLG00000001346	1.90695	11.5812	2.20217	57.6235	0.192641	0.618998	3.57302	2.29963	-0.858964	-0.236143	FALSE	FALSE
M00384	IGDB17970	meox1	2.0092	12.0193	1.28551	15.1788	0.710621	1.17278	3.92009	2.09543	-0.871138	-0.146232	FALSE	FALSE
M00385	IGDB07056	nkx2.4b	1.5032	4.84157	1.20015	7.62555	2.13859	1.73528	4.31383	2.32419	-0.271926	0.0643023	FALSE	FALSE
M00385	IGDB06393	nkx2.4a	1.5032	4.84157	4.84523	3.26032	2.13859	1.73528	4.31383	2.32419	-0.271926	0.0643023	FALSE	FALSE
M00385	IGDB06144	nkx2.1	1.5032	4.84157	1.44106	2.20856	2.13859	1.73528	4.31383	2.32419	-0.271926	0.0643023	FALSE	FALSE
M00386	IGDB03180	irx2a	1.15797	-1.49993	1.03373	1.53124	NA	NA	NA	NA	NA	NA	FALSE	FALSE
M00386	IGDB21692	irx5a	1.15797	-1.49993	5.53029	21.3374	NA	NA	NA	NA	NA	NA	FALSE	FALSE
M00386	IGDB08732	irx5b	1.15797	-1.49993	1.03472	1.42965	NA	NA	NA	NA	NA	NA	FALSE	FALSE
M00387	IGDB17625	dlx3b	-1.99685	5.01887	20.3707	113.476	-0.219955	0.103274	3.15248	1.87066	-1.25893	-0.39095	FALSE	FALSE
M00387	IGDB09787	Dlx3	-1.99685	5.01887	2.16378	2.53508	-0.219955	0.103274	3.15248	1.87066	-1.25893	-0.39095	FALSE	FALSE
M00388	IGDB05591	mnx1	-2.94819	11.608	1.13493	11.1327	0.119699	0.755911	3.60548	2.07087	-0.971978	0.0729699	FALSE	FALSE
M00388	IGDB06068	ENSORLG00000018251	-2.94819	11.608	2.30261	1	0.119699	0.755911	3.60548	2.07087	-0.971978	0.0729699	FALSE	FALSE
M00388	IGDB21354	mnx2b	-2.94819	11.608	1.68162	1.83002	0.119699	0.755911	3.60548	2.07087	-0.971978	0.0729699	FALSE	FALSE
M00389	IGDB24431	hoxc13a	-5.86155	1.77312	1.7227	1.02027	-0.556327	0.0291293	3.23622	1.82473	-1.70082	-0.39042	FALSE	FALSE
M00390	IGDB08998	hoxc11a	-3.01131	5.65526	1.28544	1	-0.187321	0.752528	3.11455	1.82957	-1.47439	-0.323236	FALSE	FALSE
M00390	IGDB05971	hoxd11a	-3.01131	5.65526	1.8563	1.52437	-0.187321	0.752528	3.11455	1.82957	-1.47439	-0.323236	FALSE	FALSE
M00392	IGDB24435	hoxc6a	-0.799919	10.8268	3.30087	20.71	-0.5966	-0.280003	2.5415	1.72301	-1.62426	-0.455954	FALSE	FALSE
M00393	IGDB05970	ENSORLG00000017534	4.82407	10.444	3.37195	1.02264	2.97743	2.99612	5.74693	2.81992	-0.173384	0.605656	FALSE	FALSE
M00393	IGDB01303	EVX1	4.82407	10.444	1.6096	1.0415	2.97743	2.99612	5.74693	2.81992	-0.173384	0.605656	FALSE	FALSE
M00396	IGDB14167	crx	0.962613	11.2029	1.18834	1.09077	2.24456	2.8888	5.06265	2.79443	0.0353502	0.534026	FALSE	FALSE
M00399	IGDB19505	pknox1.2	-5.79044	-2.90686	36.5672	19.5301	2.6827	2.1811	5.32382	2.94634	0.895801	1.01887	FALSE	FALSE
M00402	IGDB08960	ENSORLG00000006191	-1.96513	14.3499	1.28612	1.21062	-0.649055	-0.212842	3.03223	1.84234	-1.49403	0.0248478	FALSE	FALSE
M00403	IGDB01299	hoxa2b	-1.58732	14.1827	3.37099	18.9627	0.460445	1.08093	3.85179	2.12254	-0.64246	-0.0291441	FALSE	FALSE
M00403	IGDB25674	hoxb2a	-1.58732	14.1827	2.05153	8.17325	0.460445	1.08093	3.85179	2.12254	-0.64246	-0.0291441	FALSE	FALSE
M00403	IGDB03270	HOXA2	-1.58732	14.1827	1.29115	5.78549	0.460445	1.08093	3.85179	2.12254	-0.64246	-0.0291441	FALSE	FALSE
M00405	IGDB14078	lhx1a	-3.29292	8.25877	2.2854	3.36099	-1.80843	-1.60617	1.10042	0.756235	-2.13418	-0.986426	FALSE	FALSE
M00405	IGDB14570	lhx1b	-3.29292	8.25877	1.93186	1.27083	-1.80843	-1.60617	1.10042	0.756235	-2.13418	-0.986426	FALSE	FALSE
M00405	IGDB01561	lhx5	-3.29292	8.25877	3.89709	7.3711	-1.80843	-1.60617	1.10042	0.756235	-2.13418	-0.986426	FALSE	FALSE
M00405	IGDB01106	Lhx1	-3.29292	8.25877	1.31237	1.02897	-1.80843	-1.60617	1.10042	0.756235	-2.13418	-0.986426	FALSE	FALSE
M00408	IGDB13702	hnf1ba	2.49469	4.29874	12.8566	23.0938	NA	NA	NA	NA	NA	NA	FALSE	FALSE
M00409	IGDB17624	DLX4	-2.98405	3.13231	1.17137	25.8122	-0.247495	0.217326	2.92471	1.83907	-1.49531	-0.524992	FALSE	FALSE
M00410	IGDB25669	hoxb9a	-4.31343	7.20191	1.27089	14.6127	-0.653964	0.213965	2.80121	2.00043	-1.05583	-0.0386736	FALSE	FALSE
M00413	IGDB08272	barx1	5.04057	9.15816	1.08641	2.13316	2.41761	2.56348	5.27506	2.82401	-0.133803	0.813636	FALSE	FALSE
M00416	IGDB03179	irx4a	3.21536	4.26618	1.81383	1.15013	NA	NA	NA	NA	NA	NA	FALSE	FALSE
M00416	IGDB21691	irx6a	3.21536	4.26618	1.0598	1.05876	NA	NA	NA	NA	NA	NA	FALSE	FALSE
M00417	IGDB01564	otpa	1.51933	15.2322	1.13611	1.93341	1.1731	1.85179	4.00093	2.26453	-0.732514	0.290926	FALSE	FALSE
M00417	IGDB09918	otpb	1.51933	15.2322	1.03378	1.06907	1.1731	1.85179	4.00093	2.26453	-0.732514	0.290926	FALSE	FALSE
M00418	IGDB13869	otx5	0.946266	10.9392	2.00915	1.30784	2.46594	2.94946	5.5122	2.80936	-0.315963	0.46577	FALSE	FALSE
M00419	IGDB12856	zgc:91944	4.56357	2.55913	10.3823	14.0658	NA	NA	NA	NA	NA	NA	FALSE	FALSE
M00419	IGDB20900	hmbox1b	4.56357	2.55913	3.68672	15.9181	NA	NA	NA	NA	NA	NA	FALSE	FALSE
M00419	IGDB21733	hmbox1a	4.56357	2.55913	12.4758	3.90322	NA	NA	NA	NA	NA	NA	FALSE	FALSE
M00422	IGDB09001	hoxc5a	0.490409	9.03736	1.20836	3.39154	-0.84555	-0.624166	3.22358	1.8035	-1.16306	-0.197715	FALSE	FALSE
M00423	IGDB01291	dlx5a	-2.57213	5.41101	2.96859	25.1169	-0.0756269	0.257001	3.25772	1.91883	-1.30872	-0.475749	FALSE	FALSE
M00423	IGDB19336	dlx2	-2.57213	5.41101	7.61396	71.2408	-0.0756269	0.257001	3.25772	1.91883	-1.30872	-0.475749	FALSE	FALSE
M00425	IGDB15080	six2a	3.18328	0.920849	1.10377	3.20063	1.6091	1.59918	4.04479	2.84323	-0.196157	0.291955	FALSE	FALSE
M00425	IGDB02126	six9	3.18328	0.920849	1	1.08411	1.6091	1.59918	4.04479	2.84323	-0.196157	0.291955	FALSE	FALSE
M00427	IGDB11968	Cdx1	-2.41537	7.85401	1.0681	1.374	-0.668825	0.0121538	2.91592	1.97519	-0.921773	-0.0469878	FALSE	FALSE
M00427	IGDB14694	Cdx1	-2.41537	7.85401	1.09304	2.10991	-0.668825	0.0121538	2.91592	1.97519	-0.921773	-0.0469878	FALSE	FALSE
M00430	IGDB01643	lhx3	-1.96513	14.3499	1.02328	1.11077	-0.443907	-0.0113916	3.20823	1.98145	-1.4012	0.0788923	FALSE	FALSE
M00430	IGDB07970	lhx4	-1.96513	14.3499	1.02698	1.5196	-0.443907	-0.0113916	3.20823	1.98145	-1.4012	0.0788923	FALSE	FALSE
M00431	IGDB22297	prrx1b	-0.0868634	13.5375	2.40207	28.4162	1.71164	2.29337	4.11382	2.04393	-0.754616	0.358502	FALSE	FALSE
M00432	IGDB01797	lmx1ba	-2.73048	5.91097	2.11852	1.55089	-2.00971	-1.70952	2.00439	1.12512	-2.04807	-0.735555	FALSE	FALSE
M00432	IGDB07932	lmx1a	-2.73048	5.91097	1	2.64709	-2.00971	-1.70952	2.00439	1.12512	-2.04807	-0.735555	FALSE	FALSE
M00432	IGDB25218	lmx1al	-2.73048	5.91097	1.03319	1.55615	-2.00971	-1.70952	2.00439	1.12512	-2.04807	-0.735555	FALSE	FALSE
M00432	IGDB26262	lmx1bb	-2.73048	5.91097	1.12056	13.7884	-2.00971	-1.70952	2.00439	1.12512	-2.04807	-0.735555	FALSE	FALSE
M00433	IGDB13376	barhl1b	-1.61694	8.21734	1.32041	3.20708	1.06721	1.95819	4.01275	2.87879	-0.107942	0.857132	FALSE	FALSE
M00434	IGDB09840	si:ch211-236k19.2	-0.661261	6.97369	1.71693	1.01745	0.756809	0.830777	3.67059	2.09191	-1.05255	-0.20767	FALSE	FALSE
M00434	IGDB13275	lhx6	-0.661261	6.97369	1.79124	2.70218	0.756809	0.830777	3.67059	2.09191	-1.05255	-0.20767	FALSE	FALSE
M00437	IGDB19692	meis2a	-4.96577	-2.24698	1.74321	47.1792	2.51064	2.401	5.10356	2.99792	-0.131985	0.707023	FALSE	FALSE
M00437	IGDB06956	meis2a	-4.96577	-2.24698	1.20453	6.92424	2.51064	2.401	5.10356	2.99792	-0.131985	0.707023	FALSE	FALSE
M00438	IGDB07055	ENSORLG00000017180	1.04158	2.43958	1.11277	3.1044	1.81437	1.61814	4.05172	2.01758	-0.838093	-0.0498827	FALSE	FALSE
M00438	IGDB19957	nkx2.2a	1.04158	2.43958	1.23126	6.60281	1.81437	1.61814	4.05172	2.01758	-0.838093	-0.0498827	FALSE	FALSE
M00439	IGDB13800	shox2	-4.00809	12.8058	3.68273	1.35242	0.266526	1.0342	3.3007	2.07438	-1.43304	-0.208714	FALSE	FALSE
M00439	IGDB19056	mog-12	-4.00809	12.8058	1.78066	1.02408	0.266526	1.0342	3.3007	2.07438	-1.43304	-0.208714	FALSE	FALSE
M00442	IGDB12207	nkx1.2lb	-2.14753	13.9622	3.3694	1.08364	2.36083	3.02439	4.80352	3.32691	0.249693	1.07179	FALSE	FALSE
M00446	IGDB05560	pdx1	-0.459169	12.6646	1.22317	1.0929	NA	NA	NA	NA	NA	NA	FALSE	FALSE
M00448	IGDB12732	Nobox	-1.11556	11.3902	33.5482	1.69794	0.885922	1.47435	3.78622	2.24741	-0.57219	-0.0830471	FALSE	FALSE
M00450	IGDB12485	hoxa1a	-0.00681526	14.1414	1.64269	13.9656	0.443322	0.968195	3.7775	1.85474	-0.894915	0.0164564	FALSE	FALSE
M00450	IGDB04946	hoxb1b	-0.00681526	14.1414	28.6291	85.6267	0.443322	0.968195	3.7775	1.85474	-0.894915	0.0164564	FALSE	FALSE
M00451	IGDB08740	dbx1b	-2.63352	3.4018	1.06352	1.06483	-1.87307	-1.54347	1.61598	1.22477	-2.33872	-0.825476	FALSE	FALSE
M00451	IGDB07262	dbx1a	-2.63352	3.4018	1.91599	10.2151	-1.87307	-1.54347	1.61598	1.22477	-2.33872	-0.825476	FALSE	FALSE
M00453	IGDB09156	irx7	1.92517	-3.09197	17.2943	104.927	-0.709987	-0.544885	2.49676	1.13813	-2.22088	-0.701236	FALSE	FALSE
M00453	IGDB21694	irx3a	1.92517	-3.09197	7.07081	47.1111	-0.709987	-0.544885	2.49676	1.13813	-2.22088	-0.701236	FALSE	FALSE
M00453	IGDB15639	irx1a	1.92517	-3.09197	1.43877	21.1909	-0.709987	-0.544885	2.49676	1.13813	-2.22088	-0.701236	FALSE	FALSE
M00457	IGDB14023	barx2	-0.453749	8.43431	1.36939	1.05974	-0.141557	0.384794	3.4115	1.96064	-1.43468	-0.140419	FALSE	FALSE
M00460	IGDB07636	barhl2	-1.56398	8.42117	1	5.23533	0.267579	0.981824	3.48159	2.57106	-0.602513	0.131018	FALSE	FALSE
M00461	IGDB19823	six4a	1.35206	1.34162	2.06751	20.5616	0.985512	0.77387	4.40165	2.10621	-0.976113	-0.213037	FALSE	FALSE
M00466	IGDB10033	nkx6.3	-0.869318	8.22427	1	1.41957	-0.830475	-0.495849	2.65578	1.50715	-2.01788	-0.679526	FALSE	FALSE
M00466	IGDB01501	ENSORLG00000019018	-0.869318	8.22427	1.50376	1.85666	-0.830475	-0.495849	2.65578	1.50715	-2.01788	-0.679526	FALSE	FALSE
M00468	IGDB14157	pknox2	-5.74145	-2.50014	1.77812	2.85343	2.39433	2.14256	5.26554	2.68051	-0.102975	0.830815	FALSE	FALSE
M00469	IGDB02521	gsx1	0.868183	13.6486	1.1186	1.91843	1.3464	2.01235	4.13543	1.99609	-0.938921	0.0614548	FALSE	FALSE
M00469	IGDB07576	gsx2	0.868183	13.6486	1.21385	2.32672	1.3464	2.01235	4.13543	1.99609	-0.938921	0.0614548	FALSE	FALSE
M00471	IGDB08424	alx1	-2.30953	9.543	1.05437	12.2351	-0.210561	0.475823	3.00988	1.59176	-1.9349	-0.18661	FALSE	FALSE
M00473	IGDB01302	hoxa13a	-4.59311	0.431374	2.10046	1.00659	-0.279529	0.407478	3.20926	1.70565	-1.869	-0.431064	FALSE	FALSE
M00473	IGDB03266	hoxa13b	-4.59311	0.431374	1.01067	1	-0.279529	0.407478	3.20926	1.70565	-1.869	-0.431064	FALSE	FALSE
M00474	IGDB12489	hoxa11a	-5.57972	2.82623	2.1302	1.61553	NA	NA	NA	NA	NA	NA	FALSE	FALSE
M00474	IGDB03267	hoxa11b	-5.57972	2.82623	3.56858	14.1079	NA	NA	NA	NA	NA	NA	FALSE	FALSE
M00475	IGDB03269	hoxa9b	-4.56651	6.00583	1.01108	1.988	NA	NA	NA	NA	NA	NA	FALSE	FALSE
M00475	IGDB02787	ENSORLG00000001349	-4.56651	6.00583	1.17454	1.72373	NA	NA	NA	NA	NA	NA	FALSE	FALSE
M00476	IGDB01301	Hoxa7	2.5858	10.2079	3.7177	8.40867	2.06275	2.26173	5.12085	1.99476	-0.600099	0.120227	FALSE	FALSE
M00478	IGDB01300	hoxa5a	2.57761	12.4624	1.17102	2.51842	1.28263	1.67794	4.09114	2.0775	-0.737902	-0.036583	FALSE	FALSE
M00478	IGDB12486	hoxa9	2.57761	12.4624	6.3416	31.7112	1.28263	1.67794	4.09114	2.0775	-0.737902	-0.036583	FALSE	FALSE
M00478	IGDB04947	hoxb5b	2.57761	12.4624	1.43522	3.64817	1.28263	1.67794	4.09114	2.0775	-0.737902	-0.036583	FALSE	FALSE
M00478	IGDB09750	HOXB5	2.57761	12.4624	2.03351	3.14005	1.28263	1.67794	4.09114	2.0775	-0.737902	-0.036583	FALSE	FALSE
M00479	IGDB25671	hoxb4a	2.9408	10.9413	8.02542	3.18332	0.614306	1.12245	3.85181	2.27862	-0.781328	-0.28218	FALSE	FALSE
M00483	IGDB17326	six7	2.89364	2.40603	4.38038	6.86852	NA	NA	NA	NA	NA	NA	FALSE	FALSE
M00483	IGDB15081	six3a	2.89364	2.40603	3.27446	10.2127	NA	NA	NA	NA	NA	NA	FALSE	FALSE
M00484	IGDB18810	en2	-1.60628	9.784	4.12307	30.9327	1.39547	2.17911	3.98993	2.19753	-0.657289	0.254709	FALSE	FALSE
M00484	IGDB16488	ENSORLG00000008039	-1.60628	9.784	32.8695	10.1613	1.39547	2.17911	3.98993	2.19753	-0.657289	0.254709	FALSE	FALSE
M00485	IGDB18652	nanog	-0.870623	11.7381	1125.68	1.67042	NA	NA	NA	NA	NA	NA	FALSE	FALSE
M00485	IGDB06881	hlx1	-0.870623	11.7381	4.24943	4.2671	NA	NA	NA	NA	NA	NA	FALSE	FALSE
M00487	IGDB23592	alx4a	-4.00809	12.8058	1.05205	2.88673	0.332735	1.04272	3.37845	2.1387	-1.49062	-0.190957	FALSE	FALSE
M00487	IGDB07364	alx4a	-4.00809	12.8058	1.00867	1.17818	0.332735	1.04272	3.37845	2.1387	-1.49062	-0.190957	FALSE	FALSE
M00488	IGDB14984	meis1b	-4.96577	-2.24698	9.58944	34.9907	2.02981	1.79654	5.31183	2.62455	0.0247797	0.657952	FALSE	FALSE
M00488	IGDB13861	meis3	-4.96577	-2.24698	2.4343	103.783	2.02981	1.79654	5.31183	2.62455	0.0247797	0.657952	FALSE	FALSE
M00491	IGDB05964	dlx1a	-2.85377	3.93493	1.42448	4.4986	0.132424	0.528964	3.58627	1.96266	-1.21483	-0.491224	FALSE	FALSE
M00495	IGDB15436	emx2	0.0976487	13.5998	1.15729	6.21997	1.65246	2.36388	4.28235	2.43322	-0.343212	0.438196	FALSE	FALSE
M00497	IGDB00075	Nkx2-3	2.55604	4.44295	1.27329	3.53639	2.0984	1.89195	4.31703	2.22372	-0.831668	0.18969	FALSE	FALSE
M00497	IGDB02952	nkx2.3	2.55604	4.44295	1.42834	10.575	2.0984	1.89195	4.31703	2.22372	-0.831668	0.18969	FALSE	FALSE
M00499	IGDB08544	CABZ01093502.1	-3.5807	6.16226	1.17191	2.0376	NA	NA	NA	NA	NA	NA	FALSE	FALSE
M00500	IGDB18805	tgif1	-5.23384	-2.76615	71.8028	54.6222	2.58685	2.50259	5.26518	2.90898	0.235617	0.47336	FALSE	FALSE
M00503	IGDB02912	nkx1.2la	-2.92338	13.2242	1.89717	1.85694	2.4099	3.36434	4.82094	3.54027	0.576406	1.17783	FALSE	FALSE
M00504	IGDB25672	ENSORLG00000017048	3.01118	10.1839	3.18475	13.0366	1.58795	2.00695	4.5626	2.44001	-0.422754	-0.0422685	FALSE	FALSE
M00505	IGDB25668	hoxb13a	-5.21768	2.6649	1.07751	1.025	-0.154488	0.589116	3.21337	1.96377	-0.283075	-0.127741	FALSE	FALSE
M00506	IGDB11749	nkx3.2	3.23523	4.47333	2.29236	1.71993	2.60764	1.89586	4.1905	2.13213	-0.762155	0.20254	FALSE	FALSE
M00506	IGDB02951	ENSORLG00000007716	3.23523	4.47333	1	3.64487	2.60764	1.89586	4.1905	2.13213	-0.762155	0.20254	FALSE	FALSE
M00507	IGDB04322	ENSORLG00000006068	0.0555895	7.92602	5.8067	1.08987	-0.217823	0.200794	2.53892	1.99578	-1.47065	-0.39422	FALSE	FALSE
M00507	IGDB00555	hmx4	0.0555895	7.92602	1.84252	2.88933	-0.217823	0.200794	2.53892	1.99578	-1.47065	-0.39422	FALSE	FALSE
M00507	IGDB02909	hmx2	0.0555895	7.92602	1.40893	2.23389	-0.217823	0.200794	2.53892	1.99578	-1.47065	-0.39422	FALSE	FALSE
M00508	IGDB24432	hoxc12a	-4.27242	5.88077	2.23912	1.03126	-0.402344	0.50607	2.85334	1.77122	-1.35842	-0.216518	FALSE	FALSE
M00512	IGDB19824	six1b	1.03702	0.771564	1.8662	16.0702	1.21868	0.93787	4.28074	2.22964	-0.713457	0.109909	FALSE	FALSE
M00513	IGDB22340	PBX1	1.41644	3.66545	12.6564	1.27052	NA	NA	NA	NA	NA	NA	FALSE	FALSE
M00517	IGDB09748	hoxb8b	0.771356	10.0837	1.34628	2.56347	1.18551	1.53751	4.53494	2.30852	-0.630468	0.115319	FALSE	FALSE
M00518	IGDB16642	Homez	0.477315	0.288913	78.96	20.3189	NA	NA	NA	NA	NA	NA	FALSE	FALSE
M00531	IGDB19353	hoxd3a	0.952139	11.3103	1.19432	8.05878	0.949521	1.21411	3.85066	1.99367	-1.25654	-0.236322	FALSE	FALSE
M00534	IGDB16680	lhx8a	4.72967	8.13783	7.00913	1.09456	5.16941	4.84187	7.05313	5.83222	5.15927	2.40712	FALSE	FALSE
M00534	IGDB07667	lhx8b	4.72967	8.13783	1.31614	1.1277	5.16941	4.84187	7.05313	5.83222	5.15927	2.40712	FALSE	FALSE
M00538	IGDB19352	hoxd12a	-3.06715	4.12896	1.27005	1.0763	-0.701467	-0.0529025	2.67959	1.74373	-1.27634	-0.230402	FALSE	FALSE
M00541	IGDB09266	Pax7	-6.90432	3.3306	1.903	1.11991	-0.209883	0.316635	3.01723	1.89928	-1.55135	-0.652126	FALSE	FALSE
M00541	IGDB22779	PAX7	-6.90432	3.3306	1.91784	4.84992	-0.209883	0.316635	3.01723	1.89928	-1.55135	-0.652126	FALSE	FALSE
M00544	IGDB15951	Pou2f2	-1.41972	7.55939	8.17003	2.103	-0.677045	-0.289322	2.45856	1.56438	-1.60471	-0.577539	FALSE	FALSE
M00544	IGDB12579	Pou2f2	-1.41972	7.55939	2.18166	2.08885	-0.677045	-0.289322	2.45856	1.56438	-1.60471	-0.577539	FALSE	FALSE
M00545	IGDB09133	Pou6f1	-1.45299	11.2333	2.84481	4.72214	1.47084	1.58946	4.51154	2.1398	-1.2502	-0.255542	FALSE	FALSE
M00546	IGDB09133	Pou6f1	-2.35632	9.44609	2.84481	4.72214	1.3028	1.48776	4.6023	1.87974	-1.57894	-0.254815	FALSE	FALSE
M00547	IGDB02403	Pou4f3	-3.16856	0.278557	1.01221	1	-1.78588	-1.36459	1.7377	1.17223	-2.2402	-0.834023	FALSE	FALSE
M00551	IGDB13298	Pou3f1	-2.12896	3.4482	1175.01	19.1245	-1.09662	-0.780377	2.37756	1.23537	-2.37983	-1.0116	FALSE	FALSE
M00551	IGDB16024	Pou3f1	-2.12896	3.4482	2.26346	4.695	-1.09662	-0.780377	2.37756	1.23537	-2.37983	-1.0116	FALSE	FALSE
M00551	IGDB14791	Pou3f1	-2.12896	3.4482	1.10672	1.7044	-1.09662	-0.780377	2.37756	1.23537	-2.37983	-1.0116	FALSE	FALSE
M00553	IGDB13298	Pou3f3	2.7488	-8.26312	1175.01	19.1245	NA	NA	NA	NA	NA	NA	FALSE	FALSE
M00553	IGDB05814	Pou3f3	2.7488	-8.26312	1.59534	1.4184	NA	NA	NA	NA	NA	NA	FALSE	FALSE
M00650	IGDB16903	ST18	4.94443	0.121255	1.14408	1.12474	-0.748296	-0.51294	2.93392	2.0402	-0.9078	-0.462907	FALSE	FALSE
M00650	IGDB06439	MYT1L	4.94443	0.121255	1.11267	1.12409	-0.748296	-0.51294	2.93392	2.0402	-0.9078	-0.462907	FALSE	FALSE
M00650	IGDB21117	MYT1L	4.94443	0.121255	1.28667	1.77298	-0.748296	-0.51294	2.93392	2.0402	-0.9078	-0.462907	FALSE	FALSE
M00735	IGDB17270	ENSORLG00000006995	-2.09229	2.00592	24.2211	11.0178	3.19352	3.12198	5.13627	3.08699	1.39236	0.973914	FALSE	FALSE
M00735	IGDB00244	rbpja	-2.09229	2.00592	32.1227	31.8852	3.19352	3.12198	5.13627	3.08699	1.39236	0.973914	FALSE	FALSE
M00751	IGDB22741	hmga2	0.107952	2.68326	4.25892	39.7068	NA	NA	NA	NA	NA	NA	FALSE	FALSE
M00752	IGDB09429	Mlx	8.12154	-4.41305	2.20742	6.83153	5.11226	4.25273	7.14055	5.12162	3.6704	2.4452	FALSE	FALSE
M00753	IGDB16752	Tcf3	7.72939	3.04076	10.017	28.8496	1.8491	1.48358	5.70101	2.93919	0.848987	1.11666	FALSE	FALSE
M00754	IGDB25354	srebf1	4.91324	-2.92164	29.1916	18.0318	4.58806	3.8293	6.29685	4.20284	-0.242788	1.60721	FALSE	FALSE
M00759	IGDB11449	Atf4	4.84516	-6.4378	99.4487	423.648	0.910931	0.201459	4.04909	1.90174	-0.677816	-0.316219	FALSE	FALSE
M00759	IGDB25493	ATF4	4.84516	-6.4378	54.1122	215.332	0.910931	0.201459	4.04909	1.90174	-0.677816	-0.316219	FALSE	FALSE
M00761	IGDB24692	cebpb	5.25744	-8.85625	5.547	11.3051	1.3471	0.301767	3.43657	2.22763	-1.58168	-0.424549	FALSE	FALSE
M00762	IGDB01327	Dbp	6.54903	-10.379	3.3558	1.89075	1.5149	0.325602	3.0661	1.62887	-2.40916	-0.425424	FALSE	FALSE
M00762	IGDB15875	Dbp	6.54903	-10.379	28.3658	5.21221	1.5149	0.325602	3.0661	1.62887	-2.40916	-0.425424	FALSE	FALSE
M00765	IGDB08120	sp1	8.85964	0.920865	130.793	22.1041	6.78405	6.12719	10.3944	10.2165	10.2713	8.13028	FALSE	FALSE
M00770	IGDB08885	Zfp202	-7.80917	15.0155	3.66729	3.57099	4.49799	4.95057	6.82846	3.00629	1.41341	2.34058	FALSE	FALSE
M00775	IGDB20854	Zbtb1	3.35651	0.511944	29.0523	9.1762	4.88512	4.71168	7.64061	6.47995	5.1548	4.58085	FALSE	FALSE
M00776	IGDB10023	egr3	3.96358	-1.43944	1.69015	1.13689	5.55573	4.96957	8.47411	8.67605	9.01475	4.77581	FALSE	FALSE
M00776	IGDB14195	ENSORLG00000000766	3.96358	-1.43944	10.7146	9.31532	5.55573	4.96957	8.47411	8.67605	9.01475	4.77581	FALSE	FALSE
M00777	IGDB26170	ENSORLG00000010690	6.01826	-2.13555	41.2964	2.46442	3.56272	2.86047	6.53969	3.55828	1.25348	2.44243	FALSE	FALSE
M00777	IGDB16502	zgc:153115	6.01826	-2.13555	62.8083	45.2963	3.56272	2.86047	6.53969	3.55828	1.25348	2.44243	FALSE	FALSE
M00781	IGDB24486	Snai1	-4.04778	-2.79053	1497.25	54.4452	2.51719	2.50691	5.04191	2.87557	0.204521	0.416928	FALSE	FALSE
M00781	IGDB23104	snai1a	-4.04778	-2.79053	107.363	143.411	2.51719	2.50691	5.04191	2.87557	0.204521	0.416928	FALSE	FALSE
M00786	IGDB20429	Zfp637	-0.298716	-4.41386	33.3223	16.1606	-3.96291	-5.79709	1.06999	0.604627	-1.69251	-1.00939	FALSE	FALSE
M00787	IGDB19072	klf12b	16.5521	-3.64845	1.84142	12.4073	5.27469	3.89132	9.99312	10.0664	9.05373	7.42897	FALSE	FALSE
M00790	IGDB15885	ENSORLG00000011631	7.89742	4.16289	1.22905	1.35269	1.50842	1.22487	3.77078	2.19715	0.224066	-0.0113861	FALSE	FALSE
M00791	IGDB02835	foxg1d	6.95614	1.98829	8.01108	2.33574	1.71914	1.28941	3.74623	2.07574	-0.943323	-0.196865	FALSE	FALSE
M00792	IGDB20214	foxp2	8.93888	2.4081	4.25534	3.18353	1.69584	1.30076	3.58107	2.43583	-0.28656	0.19023	FALSE	FALSE
M00793	IGDB23181	foxp4	6.41064	3.12631	1.20824	9.3957	1.46246	0.824706	3.5324	2.54133	0.0349912	0.0502038	FALSE	FALSE
M00793	IGDB09240	Foxp3	6.41064	3.12631	4.39998	1.04208	1.46246	0.824706	3.5324	2.54133	0.0349912	0.0502038	FALSE	FALSE
M00794	IGDB11852	foxo4	10.6777	0.358125	10.3498	6.595	1.15221	0.871272	3.36226	1.58827	-0.868142	-0.0524645	FALSE	FALSE
M00795	IGDB20765	foxo3	6.99312	1.97157	10.0574	7.32846	1.52922	1.04219	3.63642	2.42382	-0.107879	-0.0147465	FALSE	FALSE
M00795	IGDB13656	foxo1a	6.99312	1.97157	2.98518	6.10028	1.52922	1.04219	3.63642	2.42382	-0.107879	-0.0147465	FALSE	FALSE
M00795	IGDB14499	foxo1b	6.99312	1.97157	1.06595	1.18012	1.52922	1.04219	3.63642	2.42382	-0.107879	-0.0147465	FALSE	FALSE
M00797	IGDB19521	Foxo3	8.70822	3.50142	3.91853	3.0953	1.54073	1.18608	3.73082	2.42757	-0.326413	0.189748	FALSE	FALSE
M00798	IGDB01370	foxo6b	10.3707	1.36094	10.2487	1.36815	1.58082	1.25158	3.4228	1.86506	-0.72241	0.0228864	FALSE	FALSE
M00798	IGDB15993	foxo6a	10.3707	1.36094	1.08368	1.36499	1.58082	1.25158	3.4228	1.86506	-0.72241	0.0228864	FALSE	FALSE
M00803	IGDB02670	ENSORLG00000014257	17.3305	3.73538	1.06575	1.05069	0.516635	-0.342283	2.70272	1.54806	-1.7526	-0.422006	FALSE	FALSE
M00803	IGDB18309	pou3f3b	17.3305	3.73538	1.62573	4.0628	0.516635	-0.342283	2.70272	1.54806	-1.7526	-0.422006	FALSE	FALSE
M00804	IGDB13298	Pou3f1	-1.8883	7.91818	1175.01	19.1245	-0.414009	-0.00086267	3.07389	1.83615	-1.66819	-0.16303	FALSE	FALSE
M00804	IGDB14791	Pou3f1	-1.8883	7.91818	1.10672	1.7044	-0.414009	-0.00086267	3.07389	1.83615	-1.66819	-0.16303	FALSE	FALSE
M00804	IGDB16024	Pou3f1	-1.8883	7.91818	2.26346	4.695	-0.414009	-0.00086267	3.07389	1.83615	-1.66819	-0.16303	FALSE	FALSE
M00805	IGDB12131	irf2	-1.21913	-2.96065	47.0886	13.8483	0.239292	0.152352	3.65969	2.28968	-0.353038	-0.4463	FALSE	FALSE
M00805	IGDB21626	irf1a	-1.21913	-2.96065	1.03695	1.11555	0.239292	0.152352	3.65969	2.28968	-0.353038	-0.4463	FALSE	FALSE
M00806	IGDB09228	mecp2	3.42618	5.87504	2.97947	3.31833	NA	NA	NA	NA	NA	NA	FALSE	FALSE
M00807	IGDB23041	mybl2b	5.08453	-2.03617	41.0183	28.2021	3.38066	2.63585	6.23923	3.82865	2.18223	3.18572	FALSE	FALSE
M00807	IGDB24242	Mybl2	5.08453	-2.03617	80.68	13.09	3.38066	2.63585	6.23923	3.82865	2.18223	3.18572	FALSE	FALSE
M00814	IGDB20762	nr2e1	3.55995	1.19149	4.75447	7.00039	0.260444	0.320311	2.83596	1.64257	-1.55726	-0.748782	FALSE	FALSE
M00817	IGDB07444	esrrga	-9.59446	5.33057	1.22247	1.12298	1.81858	1.57274	4.85027	3.18647	0.421537	0.757803	FALSE	FALSE
M00817	IGDB06340	esrrb	-9.59446	5.33057	1.19937	2.05028	1.81858	1.57274	4.85027	3.18647	0.421537	0.757803	FALSE	FALSE
M00817	IGDB01906	esrrd	-9.59446	5.33057	1	1	1.81858	1.57274	4.85027	3.18647	0.421537	0.757803	FALSE	FALSE
M00817	IGDB20614	errb2	-9.59446	5.33057	7.58933	2.08421	1.81858	1.57274	4.85027	3.18647	0.421537	0.757803	FALSE	FALSE
M00818	IGDB15769	nr4a3	-4.62185	10.3621	1.13746	1.55578	1.6608	2.23586	4.3101	3.0917	0.441866	0.503147	FALSE	FALSE
M00818	IGDB19292	nr4a2a	-4.62185	10.3621	1.93587	1.36527	1.6608	2.23586	4.3101	3.0917	0.441866	0.503147	FALSE	FALSE
M00819	IGDB23710	roraa	-0.16197	1.30349	2.62459	1.72029	1.27334	1.28781	4.09514	3.12059	0.796691	0.791236	FALSE	FALSE
M00820	IGDB26227	rorb	0.401773	8.634	2.74471	4.80254	2.84251	3.08516	5.11148	2.99624	0.192124	1.21471	FALSE	FALSE
M00820	IGDB16736	rorcb	0.401773	8.634	9.837	13.4362	2.84251	3.08516	5.11148	2.99624	0.192124	1.21471	FALSE	FALSE
M00820	IGDB21952	rorca	0.401773	8.634	1.49306	6.76227	2.84251	3.08516	5.11148	2.99624	0.192124	1.21471	FALSE	FALSE
M00821	IGDB12118	ar-alpha	1.52224	-0.499586	2.01305	1.92047	1.0452	1.0247	4.21056	1.70485	-1.1405	-0.26465	FALSE	FALSE
M00826	IGDB00224	Sox10	6.13082	11.8352	1.06648	10.9379	-0.0635864	0.25107	2.84506	1.9952	-1.65483	-0.493062	FALSE	FALSE
M00826	IGDB25547	sox10	6.13082	11.8352	2.75905	8.41531	-0.0635864	0.25107	2.84506	1.9952	-1.65483	-0.493062	FALSE	FALSE
M00827	IGDB17423	sox19b	7.23784	7.27268	146.831	77.0644	NA	NA	NA	NA	NA	NA	FALSE	FALSE
M00828	IGDB07366	sox6b	4.71626	12.4388	1.86564	1.38823	-1.04071	-0.546877	2.73061	1.7641	-1.42461	-0.355382	FALSE	FALSE
M00828	IGDB23445	sox6a	4.71626	12.4388	1.29142	1.96315	-1.04071	-0.546877	2.73061	1.7641	-1.42461	-0.355382	FALSE	FALSE
M00830	IGDB02575	tbx2b	13.5938	14.5747	1.52389	1.11359	4.16677	3.30438	6.21312	2.93215	-0.135697	0.601101	FALSE	FALSE
M00831	IGDB14081	tbx4	16.5755	10.8593	1	1.6161	3.72795	2.7081	6.17398	3.26289	0.349182	1.32956	FALSE	FALSE
M00832	IGDB26344	tbx1	13.5861	10.9534	1.17869	14.5139	2.62572	2.01982	5.54565	3.1488	-0.0345057	0.519006	FALSE	FALSE
M00833	IGDB13175	tbx5a	16.5755	10.8593	2.18179	3.78563	4.13622	2.91994	6.39723	3.32675	0.349182	1.38823	FALSE	FALSE
M00833	IGDB26090	tbx5	16.5755	10.8593	1.1877	1.33827	4.13622	2.91994	6.39723	3.32675	0.349182	1.38823	FALSE	FALSE
M00995	IGDB01860	zgc:153924	2.03561	-5.81103	1.09681	1.08667	2.26224	1.84598	5.10378	2.47638	0.289735	0.3166	FALSE	FALSE
M01009	IGDB20459	foxm1	0.777036	-0.962482	26.8138	9.88411	NA	NA	NA	NA	NA	NA	FALSE	FALSE
M01010	IGDB13842	Foxn1	2.51977	-5.5216	4.5294	1.86266	NA	NA	NA	NA	NA	NA	FALSE	FALSE
M01011	IGDB26072	FOXN4	3.60427	-4.11747	4.24044	1.93484	3.27676	2.74804	7.75896	6.10857	4.49627	4.17216	FALSE	FALSE
M01016	IGDB11847	ENSORLG00000002068	1.80493	-2.18415	1.21395	4.01548	NA	NA	NA	NA	NA	NA	FALSE	FALSE
M01028	IGDB19302	tbr1b	17.2568	7.23252	1.01742	1.06884	3.76054	2.6185	5.60161	2.92124	0.139061	0.559236	FALSE	FALSE
M01143	IGDB18437	ENSORLG00000006015	4.09903	-4.08879	30.9111	2.32002	3.67003	3.27815	6.84527	4.779	2.71514	2.36642	FALSE	FALSE
M01165	IGDB17115	Zscan29	4.65621	-2.10634	72.671	25.2509	1.39012	0.991975	5.29745	3.54341	1.46091	0.305947	FALSE	FALSE
M01165	IGDB24848	Zscan29	4.65621	-2.10634	27.3054	13.4809	1.39012	0.991975	5.29745	3.54341	1.46091	0.305947	FALSE	FALSE
M01165	IGDB08885	Zscan29	4.65621	-2.10634	3.66729	3.57099	1.39012	0.991975	5.29745	3.54341	1.46091	0.305947	FALSE	FALSE
M01173	IGDB14110	zbtb44	-1.706	-2.41374	18.9805	8.28758	0.284134	-0.115261	4.14201	2.0588	-0.496764	0.0349556	FALSE	FALSE
M01211	IGDB04268	DMRTA1	2.37238	-0.170054	1.80447	6.68997	-1.37449	-1.35455	2.14006	1.11714	-2.53541	-0.873775	FALSE	FALSE
M01227	IGDB20667	ches1	8.96113	8.76162	1.58427	4.05538	1.58333	1.19663	3.9608	2.46048	0.207354	0.433412	FALSE	FALSE
M01228	IGDB07935	foxe3	-2.77413	-2.58606	1.27714	3.52086	-0.940649	-0.94555	2.21474	0.999027	-2.90969	-0.607108	FALSE	FALSE
M01297	IGDB06464	esr2b	-5.21867	2.09295	8.12611	1.04088	0.613283	0.920558	4.08417	2.08475	-0.476277	0.16282	FALSE	FALSE
M01297	IGDB21044	esr2	-5.21867	2.09295	3.58162	6.81139	0.613283	0.920558	4.08417	2.08475	-0.476277	0.16282	FALSE	FALSE
M01301	IGDB11191	pax5	2.58993	-1.40309	1.36788	4.37444	5.01349	4.49945	7.61137	4.90848	3.31295	2.76909	FALSE	FALSE
M01307	IGDB02745	ENSORLG00000018584	-1.26767	-2.53063	2.01674	1.11459	1.09821	1.07975	4.73477	2.48207	0.193219	0.50185	FALSE	FALSE
M01307	IGDB06853	runx2	-1.26767	-2.53063	1.09955	1.38375	1.09821	1.07975	4.73477	2.48207	0.193219	0.50185	FALSE	FALSE
M01478	IGDB16174	etv1	14.0353	-4.56289	1.21714	2.9218	6.05216	5.16285	7.23339	8.46349	7.40796	4.82039	FALSE	FALSE
M01480	IGDB09013	ENSORLG00000008369	2.22924	0.808283	1	1.0982	2.48031	2.91561	5.81869	4.04104	2.05628	1.02316	FALSE	FALSE
M01486	IGDB14030	erg	11.4431	-4.08937	1.00802	8.94734	5.50726	4.56938	6.16984	8.18839	6.97173	3.18716	FALSE	FALSE
M01486	IGDB06086	fev	11.4431	-4.08937	1.20027	1.05208	5.50726	4.56938	6.16984	8.18839	6.97173	3.18716	FALSE	FALSE
M01486	IGDB16112	fli1b	11.4431	-4.08937	1.04345	8.60947	5.50726	4.56938	6.16984	8.18839	6.97173	3.18716	FALSE	FALSE
M01491	IGDB20169	ETV6	9.26554	-4.26003	3.90867	25.3124	4.3682	3.58277	6.50662	8.10935	6.24851	2.50917	FALSE	FALSE
M01493	IGDB14029	ETS1	9.77964	-2.95934	12.3634	7.71853	4.77621	4.21294	6.60033	7.74722	6.75579	2.75136	FALSE	FALSE
M01496	IGDB15968	ENSORLG00000013535	9.72183	-5.62446	3.01463	1.78975	4.7346	3.97064	6.0476	7.33179	5.92893	2.22203	FALSE	FALSE
M01657	IGDB02722	ENSORLG00000018351	0.10045	-2.79569	10.3475	15.4902	-0.965915	-0.923397	2.60506	1.65224	-2.26635	-0.88421	FALSE	FALSE
M01657	IGDB13011	arid6	0.10045	-2.79569	1.10891	1.33017	-0.965915	-0.923397	2.60506	1.65224	-2.26635	-0.88421	FALSE	FALSE
M01661	IGDB15093	ENSORLG00000004756	0.640517	-1.68628	4.69037	4.44569	0.423988	0.0718777	3.12422	2.2946	-2.61723	-0.604502	FALSE	FALSE
M01715	IGDB09294	Tfe3	10.3095	-5.40283	2.51981	3.00638	5.92464	4.71948	8.0945	6.0652	4.21113	3.28793	FALSE	FALSE
M01716	IGDB14299	mntb	-3.43663	-5.67482	28.4581	9.60638	4.9537	4.79284	6.93271	3.10889	1.61197	1.74781	FALSE	FALSE
M01716	IGDB13831	MNT	-3.43663	-5.67482	22.3542	7.51415	4.9537	4.79284	6.93271	3.10889	1.61197	1.74781	FALSE	FALSE
M01717	IGDB25305	tfap4	-1.77207	-2.57278	37.2015	32.2313	3.18226	2.87735	5.8652	3.33413	1.13312	1.34653	FALSE	FALSE
M01717	IGDB11640	tfap4	-1.77207	-2.57278	13.3512	36.5688	3.18226	2.87735	5.8652	3.33413	1.13312	1.34653	FALSE	FALSE
M01718	IGDB06019	twist2	-10.5354	-14.3987	1.76486	5.7152	0.320513	0.201628	3.86512	1.84165	-1.36541	-0.125308	FALSE	FALSE
M01721	IGDB09429	Mlx	7.63871	-5.04408	2.20742	6.83153	5.13894	4.20921	7.52794	5.23647	3.50402	2.36798	FALSE	FALSE
M01722	IGDB16130	Heyl	-0.435943	-6.85138	3.29718	63.9984	4.03434	3.64615	7.2823	4.38509	0.64521	2.52784	FALSE	FALSE
M01722	IGDB01459	heyl	-0.435943	-6.85138	1	1.69063	4.03434	3.64615	7.2823	4.38509	0.64521	2.52784	FALSE	FALSE
M01722	IGDB24263	Heyl	-0.435943	-6.85138	1.11327	12.6842	4.03434	3.64615	7.2823	4.38509	0.64521	2.52784	FALSE	FALSE
M01722	IGDB06826	hey2	-0.435943	-6.85138	1.16522	5.18876	4.03434	3.64615	7.2823	4.38509	0.64521	2.52784	FALSE	FALSE
M01725	IGDB25552	srebf2	5.41454	-4.46915	7.73146	13.9731	5.27126	4.34924	7.03448	5.4383	2.77895	2.43819	FALSE	FALSE
M01726	IGDB22072	hes1	8.66008	-3.2784	11.542	77.3011	6.34532	5.47456	8.79946	6.93115	2.01162	4.47524	FALSE	FALSE
M01726	IGDB24324	hes4	8.66008	-3.2784	97.6432	199.929	6.34532	5.47456	8.79946	6.93115	2.01162	4.47524	FALSE	FALSE
M01727	IGDB00981	Hes7	9.15089	-3.92316	71.762	41.7529	6.36441	5.36955	9.24057	8.05276	3.77229	4.92009	FALSE	FALSE
M01728	IGDB23183	tfeb	10.2415	-5.07466	4.9469	10.5919	5.91475	5.04918	8.1098	6.53404	5.85318	3.1237	FALSE	FALSE
M01729	IGDB18735	bhlhe22	-9.45944	-11.7496	1.12198	1.18484	1.38252	1.65712	4.29171	2.05174	-1.42263	-0.16645	FALSE	FALSE
M01730	IGDB05547	msc	-13.9332	-10.5309	1	1.0907	0.300829	0.635024	3.87927	1.75684	-1.49707	-0.234903	FALSE	FALSE
M01734	IGDB08921	Hes2	-1.148	-6.20619	13.3604	1	3.79727	3.27352	5.96259	3.4917	0.33852	1.64987	FALSE	FALSE
M01734	IGDB08920	Hes2	-1.148	-6.20619	9.95513	1.33472	3.79727	3.27352	5.96259	3.4917	0.33852	1.64987	FALSE	FALSE
M01735	IGDB11164	clocka	-0.591639	-4.4752	21.1546	5.07478	3.65094	3.5481	6.67961	4.19726	2.15989	2.06235	FALSE	FALSE
M01739	IGDB23835	bhlhe41	10.8787	-4.0416	2.6521	3.43355	6.38951	5.33197	8.40206	5.43294	2.0699	4.08752	FALSE	FALSE
M01740	IGDB23615	TCF12	15.0014	-0.440913	1.16663	1.10806	3.3479	2.08874	5.90198	3.07754	0.576771	1.63371	FALSE	FALSE
M01740	IGDB21512	tcf12	15.0014	-0.440913	2.21636	17.599	3.3479	2.08874	5.90198	3.07754	0.576771	1.63371	FALSE	FALSE
M01741	IGDB08086	mitfa	10.3512	-5.58606	1.02545	1	5.90907	4.94001	7.56903	5.90724	4.44868	3.22322	FALSE	FALSE
M01741	IGDB24626	mitfb	10.3512	-5.58606	1.02167	2.84448	5.90907	4.94001	7.56903	5.90724	4.44868	3.22322	FALSE	FALSE
M01743	IGDB26015	Mlxip	-1.83484	-7.03354	38.652	6.92224	3.42536	3.40703	6.52412	2.97974	1.29789	2.05529	FALSE	FALSE
M01746	IGDB07020	tcf21	-14.6919	-12.769	1.57083	2.78322	-0.280861	-0.202772	3.60614	1.45336	-2.02424	-0.258062	FALSE	FALSE
M01747	IGDB16130	Hes5	2.33181	-3.06776	3.29718	63.9984	5.0689	4.35515	7.30963	4.10725	-0.0931504	2.94667	FALSE	FALSE
M01747	IGDB24263	Hes5	2.33181	-3.06776	1.11327	12.6842	5.0689	4.35515	7.30963	4.10725	-0.0931504	2.94667	FALSE	FALSE
M01749	IGDB04700	bhlha15	-7.11972	-12.6861	3.76109	6.53596	0.792773	0.701049	4.06938	1.90182	-1.64633	-0.0436127	FALSE	FALSE
M01750	IGDB01843	ENSORLG00000015062	14.6945	-0.317282	1.14181	2.03834	3.5573	2.30476	6.23757	3.85177	0.542684	2.06459	FALSE	FALSE
M01754	IGDB00926	atoh1b	-7.26438	-9.77113	1	1.21155	0.267895	-0.00187007	3.35699	1.99831	-1.52432	-0.318962	FALSE	FALSE
M01754	IGDB25973	atoh1a	-7.26438	-9.77113	1.40994	2.71276	0.267895	-0.00187007	3.35699	1.99831	-1.52432	-0.318962	FALSE	FALSE
M01803	IGDB25529	tefb	5.08315	-10.4851	36.0832	14.5476	1.75382	0.438881	3.693	1.89663	-1.17885	-0.391693	FALSE	FALSE
M01809	IGDB20130	fosl2	9.22053	-3.65429	1.51535	6.84081	4.08589	2.98076	6.52479	4.46526	3.47888	1.26451	FALSE	FALSE
M01814	IGDB25279	mafga	-0.26719	1.37113	1.83047	3.04482	1.53044	1.61998	4.54982	2.46168	-0.398614	0.185743	FALSE	FALSE
M01820	IGDB15875	Dbp	5.27446	-10.52	28.3658	5.21221	-0.819464	-0.794437	1.96233	1.0124	-2.86516	-0.925325	FALSE	FALSE
M01820	IGDB01327	Dbp	5.27446	-10.52	3.3558	1.89075	-0.819464	-0.794437	1.96233	1.0124	-2.86516	-0.925325	FALSE	FALSE
M01842	IGDB16562	JUN	-0.575405	-6.08398	26.5175	35.6946	1.79614	1.61903	4.8565	3.09	0.171729	0.622155	FALSE	FALSE
M01849	IGDB21495	ZFHX3	-0.0932292	14.9307	1.34377	1.31779	0.635882	1.10846	3.65576	2.35289	-1.40826	-0.0201466	FALSE	FALSE
M01864	IGDB00286	Egr1	2.30945	2.14071	1.0636	1.03212	6.30345	5.91357	8.29938	6.64924	4.13424	4.12805	FALSE	FALSE
M01927	IGDB09823	dmrt3a	1.54233	0.348866	1.04226	1.04815	-1.12497	-0.924784	2.35129	1.17538	-2.74682	-0.84016	FALSE	FALSE
M01931	IGDB09822	dmrt2a	0.417675	-3.11256	8.8175	3.48102	-1.60937	-1.62943	0.767508	0.680573	-2.52215	-1.12011	FALSE	FALSE
M01937	IGDB22512	dmrta2	1.0046	-1.53907	1.13058	8.3512	NA	NA	NA	NA	NA	NA	FALSE	FALSE
M01971	IGDB23058	elk4	14.075	-3.92938	4.83653	4.13542	5.87494	5.07354	7.9155	8.85264	7.68046	4.95644	FALSE	FALSE
M01981	IGDB22764	Foxj3	8.51571	5.07488	4.78309	2.84136	1.39568	1.05215	3.73816	2.22531	0.0432379	-0.0223172	FALSE	FALSE
M01983	IGDB23707	foxb1	2.6803	-1.28428	9.06985	36.353	0.364897	0.152028	2.49058	1.50612	-1.85303	-0.351603	FALSE	FALSE
M01983	IGDB07549	Foxb1	2.6803	-1.28428	2.29723	9.62937	0.364897	0.152028	2.49058	1.50612	-1.85303	-0.351603	FALSE	FALSE
M01983	IGDB09954	foxb2	2.6803	-1.28428	1.25736	1.19896	0.364897	0.152028	2.49058	1.50612	-1.85303	-0.351603	FALSE	FALSE
M01984	IGDB04697	ENSORLG00000003248	4.0928	0.467954	1	1	0.724624	0.208527	2.67451	0.83246	-2.38474	-0.560731	FALSE	FALSE
M01985	IGDB06219	foxg1a	6.62812	2.98649	1.31932	4.36943	1.41652	1.21633	3.79723	2.42757	-0.2867	0.241479	FALSE	FALSE
M02025	IGDB05395	gcm2	1.56284	-0.0051539	1	2.07044	3.20379	2.96592	6.24921	4.22788	2.50296	1.76814	FALSE	FALSE
M02030	IGDB24717	tfcp2	7.79033	-3.84904	44.9143	23.1723	2.6284	1.74216	6.19754	3.79023	1.63117	0.912034	FALSE	FALSE
M02030	IGDB12744	ubp1	7.79033	-3.84904	75.1104	18.0178	2.6284	1.74216	6.19754	3.79023	1.63117	0.912034	FALSE	FALSE
M02079	IGDB06346	vsx2	-1.64428	13.4282	1.66782	1.32238	-0.479438	-0.026769	2.66048	1.21448	-2.31298	-0.367109	FALSE	FALSE
M02082	IGDB09431	si:dkey-43p13.5	0.330689	-0.0223697	1.45958	4.98516	-0.119726	-0.189664	1.78246	1.80749	-2.06372	-0.507269	FALSE	FALSE
M02088	IGDB06504	emx1	0.182336	16.148	4.40536	1.17335	1.409	2.3841	4.51721	2.224	-0.47876	0.382254	FALSE	FALSE
M02089	IGDB18646	ZFHX2	-0.672939	12.3984	47.2813	14.4463	-1.4612	-1.15775	1.62487	1.15212	-1.77383	-0.59854	FALSE	FALSE
M02090	IGDB00491	lbx1b	-1.83788	11.9249	1.21698	2.77916	0.0345819	0.609144	3.18114	1.61317	-2.04928	-0.226459	FALSE	FALSE
M02093	IGDB01103	ZHX1	3.02448	-4.91732	28.8371	13.8731	NA	NA	NA	NA	NA	NA	FALSE	FALSE
M02093	IGDB15690	ZHX1	3.02448	-4.91732	4.83967	2.24344	NA	NA	NA	NA	NA	NA	FALSE	FALSE
M02102	IGDB17879	six3	-1.1183	2.53318	3.39773	38.2191	2.81773	2.96515	5.51288	3.01478	-0.556416	0.702133	FALSE	FALSE
M02109	IGDB14849	ENSORLG00000000457	-0.66793	1.65663	106.569	35.0195	-1.03342	-0.700581	2.3591	1.69681	-1.69387	-0.707354	FALSE	FALSE
M02110	IGDB09470	pbx4	3.46286	4.23822	17.877	26.0376	1.31302	1.17796	4.55173	2.51586	-0.868227	0.194646	FALSE	FALSE
M02111	IGDB25152	ENSORLG00000004749	-0.705958	13.5355	1.71584	1.27437	-0.319101	0.223724	3.18766	1.87974	-1.9117	-0.0524266	FALSE	FALSE
M02147	IGDB17733	pax10	-1.00668	11.3499	2.40627	1	NA	NA	NA	NA	NA	NA	FALSE	FALSE
M02200	IGDB12937	ved	-3.28627	13.6848	68.2767	84.9687	-0.294125	0.221059	3.01497	1.64621	-1.94308	-0.203678	FALSE	FALSE
M02211	IGDB18068	hhex	-0.322564	12.2606	14.937	12.001	-0.633126	-0.134217	2.65916	1.52535	-1.6135	-0.49945	FALSE	FALSE
M02248	IGDB20839	hsf2	0.729721	-0.372065	39.2114	13.2215	-0.426902	-0.492075	2.10565	1.7208	-1.86998	-0.603158	FALSE	FALSE
M02254	IGDB22607	irf6	7.38754	-1.97553	250.013	16.7483	3.55601	2.65652	5.5127	4.12619	0.453989	1.14212	FALSE	FALSE
M02260	IGDB20568	irf5	7.22076	-2.04193	22.3712	9.06369	4.0424	2.91944	5.97317	4.38064	1.09121	1.99587	FALSE	FALSE
M02323	IGDB21631	Terf2	-1.79177	3.85355	42.9073	28.9433	1.09262	1.2248	4.10333	2.58738	1.48864	0.532955	FALSE	FALSE
M02395	IGDB11322	nr3c2	0.324766	-0.899264	13.1551	1.98201	1.47996	1.43228	4.2597	2.66116	0.355247	0.365271	FALSE	FALSE
M02395	IGDB14251	NR3C1	0.324766	-0.899264	18.6553	11.2545	1.47996	1.43228	4.2597	2.66116	0.355247	0.365271	FALSE	FALSE
M02405	IGDB15799	RORC	-7.47861	13.6582	36.6369	1.18746	3.45206	4.01834	5.83625	3.53561	1.28763	1.27825	FALSE	FALSE
M02425	IGDB04841	pax2b	-3.23594	-1.33901	1.02837	10.4919	3.68525	3.70223	6.41397	4.06173	1.34432	1.42708	FALSE	FALSE
M02425	IGDB15206	pax2b	-3.23594	-1.33901	1.44355	18.8297	3.68525	3.70223	6.41397	4.06173	1.34432	1.42708	FALSE	FALSE
M02434	IGDB00078	ENSORLG00000000044	-2.33966	-0.906323	1.19322	1.41625	-0.0334795	0.328868	3.09631	1.86073	-1.01541	-0.320097	FALSE	FALSE
M02440	IGDB23429	nfatc3b	-2.40501	-7.4616	44.5761	10.6233	0.407861	0.294376	3.07467	1.58357	-1.42928	-0.85726	FALSE	FALSE
M02441	IGDB24757	NFATC2	-4.0446	-8.55384	10.3172	5.33487	-0.0739921	0.0212558	2.90756	1.59855	-1.4438	-0.845719	FALSE	FALSE
M02442	IGDB23803	nfat5a	-1.22832	-8.23424	6.68513	5.22647	-0.0230786	0.0161067	2.97757	1.48345	-1.23425	-0.869842	FALSE	FALSE
M02442	IGDB07385	nfat5b	-1.22832	-8.23424	15.9914	4.59094	-0.0230786	0.0161067	2.97757	1.48345	-1.23425	-0.869842	FALSE	FALSE
M02443	IGDB01364	nfatc1	-2.88826	-6.94921	2.86647	1.41544	0.510636	0.513438	2.7864	1.62448	-1.29399	-0.877029	FALSE	FALSE
M02447	IGDB11499	ENSORLG00000011800	-10.8846	-3.14277	8.73001	9.38394	1.63248	1.98203	5.68304	4.86512	1.84021	2.66976	FALSE	FALSE
M02447	IGDB25382	RFX1	-10.8846	-3.14277	12.1347	10.9051	1.63248	1.98203	5.68304	4.86512	1.84021	2.66976	FALSE	FALSE
M02466	IGDB08953	samd11	2.28253	-1.81368	1.0782	3.51059	2.61501	2.38053	6.33595	3.81375	0.616344	1.71841	FALSE	FALSE
M02487	IGDB21977	hmg20b	-1.67717	-6.38762	124.049	52.8564	-2.00965	-1.85548	0.452688	0.635193	-4.0712	-1.14804	FALSE	FALSE
M02487	IGDB23483	hmg20a	-1.67717	-6.38762	62.3495	25.552	-2.00965	-1.85548	0.452688	0.635193	-4.0712	-1.14804	FALSE	FALSE
M02490	IGDB17359	tox4b	1.09194	-1.18846	77.9952	29.1044	NA	NA	NA	NA	NA	NA	FALSE	FALSE
M02490	IGDB11909	ssrp1a	1.09194	-1.18846	207.714	130.84	NA	NA	NA	NA	NA	NA	FALSE	FALSE
M02537	IGDB14146	thap12a	3.50992	-2.21148	18.608	22.7496	3.79284	3.2973	7.08188	5.48573	4.8417	2.43987	FALSE	FALSE
M02540	IGDB13744	prkrirb	-1.01722	-1.41651	74.0162	29.8807	4.31124	3.77868	7.76497	7.59786	5.45153	6.32733	FALSE	FALSE
M02667	IGDB13979	Mecom	1.24821	12.822	4.37466	3.07905	0.0378112	0.378588	3.72951	2.21803	0.0974467	-0.0700345	FALSE	FALSE
M02669	IGDB08721	Zfp423	-0.174434	10.8529	8.20587	13.4081	1.33671	1.8801	2.61453	4.00232	2.20543	1.17175	FALSE	FALSE
M02680	IGDB21547	Foxf1	2.88573	0.361014	1.70563	2.75383	0.831259	1.0608	3.33199	1.57688	-1.06258	-0.263759	FALSE	FALSE
M02680	IGDB04001	foxf2a	2.88573	0.361014	2.00216	1	0.831259	1.0608	3.33199	1.57688	-1.06258	-0.263759	FALSE	FALSE
M02681	IGDB00220	ENSORLG00000003779	8.41299	5.87533	1.6883	1.45543	0.443459	0.47892	3.58807	2.18763	-0.9927	0.00063695	FALSE	FALSE
M02681	IGDB09697	zgc:162612	8.41299	5.87533	1.5579	1.35481	0.443459	0.47892	3.58807	2.18763	-0.9927	0.00063695	FALSE	FALSE
M02681	IGDB22481	ENSORLG00000016766	8.41299	5.87533	2.0392	2.88046	0.443459	0.47892	3.58807	2.18763	-0.9927	0.00063695	FALSE	FALSE
M02688	IGDB12732	Nobox	-3.61569	7.73362	33.5482	1.69794	0.63409	1.37663	3.55744	2.54024	-1.09294	-0.165684	FALSE	FALSE
M02691	IGDB14223	txndc15	-1.69625	-2.56808	4.65054	1.45844	-0.251832	-0.412895	2.86686	1.19966	-0.72628	-0.804772	FALSE	FALSE
M02707	IGDB22785	pparg	1.6664	5.03313	1.80409	3.87023	2.48492	2.23339	4.52136	2.62111	0.71408	0.821431	FALSE	FALSE
M02708	IGDB07200	Nr2e3	-3.25881	1.02828	1.20535	1.07388	0.696224	0.887898	3.8617	3.07893	0.667101	0.347665	FALSE	FALSE
M02730	IGDB25811	xbp1	4.58035	-2.85659	94.0659	128.712	3.19451	2.86385	6.18142	4.32603	2.89006	1.8363	FALSE	FALSE
M02733	IGDB23850	ehf	9.33675	-0.584142	1.29809	1	3.14837	2.49117	6.76533	6.5554	5.82795	2.03139	FALSE	FALSE
M02745	IGDB26139	mef2cb	-2.3649	-6.66159	1.18064	4.32451	-1.18766	-1.12627	2.47166	1.16643	-1.58644	-0.719679	FALSE	FALSE
M02745	IGDB12948	mef2ca	-2.3649	-6.66159	1.25715	3.581	-1.18766	-1.12627	2.47166	1.16643	-1.58644	-0.719679	FALSE	FALSE
M02750	IGDB13193	rfx3	-5.65792	-1.11932	6.79358	6.26711	3.06212	3.35805	5.79007	4.90428	3.97676	2.22154	FALSE	FALSE
M02751	IGDB19974	runx3	-1.36484	-1.58363	1.68523	2.9172	0.191173	0.493462	3.71719	2.3895	-1.12758	0.185825	FALSE	FALSE
M02752	IGDB12390	eomesa	18.3445	11.1654	2.10774	1.01111	3.41336	2.13072	6.39533	3.10799	0.0736436	0.750311	FALSE	FALSE
M02771	IGDB00168	ZBED1	1.58209	-2.80734	6.26786	19.6732	0.0961138	0.0959248	3.44543	1.05724	2.21953	-0.359004	FALSE	FALSE
M02772	IGDB14642	Mlxipl	8.44007	-5.44214	37.5144	6.90351	6.08897	4.93478	7.52792	4.9667	3.64238	2.40516	FALSE	FALSE
M02773	IGDB23114	tfe3b	8.73829	-4.01351	41.9001	12.762	6.44579	5.36382	7.46591	6.24531	5.80499	3.4153	FALSE	FALSE
M02775	IGDB21980	tcf3b	11.1628	-1.00797	44.2939	85.8915	1.25913	1.00808	5.63114	2.73363	0.552076	1.08877	FALSE	FALSE
M02778	IGDB20212	tfec	4.03022	-3.77824	1	3.028	5.0208	4.1796	6.54295	4.53802	3.90405	2.41133	FALSE	FALSE
M02784	IGDB24510	bhlhe23	-5.3564	-8.17579	1.25658	1.10767	0.398949	0.497262	3.77707	1.62118	-2.16474	-0.368708	FALSE	FALSE
M02793	IGDB12800	hey1	-0.930835	-6.00516	184.162	30.2586	4.81759	4.21192	7.40218	4.34437	0.0786315	2.84019	FALSE	FALSE
M02793	IGDB15751	HEY1	-0.930835	-6.00516	14.0724	10.8182	4.81759	4.21192	7.40218	4.34437	0.0786315	2.84019	FALSE	FALSE
M02794	IGDB07489	ENSORLG00000014656	10.2794	-0.400526	1.0641	10.8974	1.66909	1.06266	5.57864	2.52785	0.224798	0.94297	FALSE	FALSE
M02794	IGDB07490	ENSORLG00000014659	10.2794	-0.400526	1.12564	10.3711	1.66909	1.06266	5.57864	2.52785	0.224798	0.94297	FALSE	FALSE
M02795	IGDB17804	neurod2	-8.23613	-7.43079	1.0679	1.01783	0.412305	1.05541	3.92652	2.40088	-0.561559	0.146623	FALSE	FALSE
M02795	IGDB25094	NEUROD2	-8.23613	-7.43079	1	1	0.412305	1.05541	3.92652	2.40088	-0.561559	0.146623	FALSE	FALSE
M02806	IGDB05761	Olig1	-6.49539	-7.75521	1.14616	1.03441	-0.163251	0.235095	3.73058	1.62536	-2.35402	-0.388976	FALSE	FALSE
M02812	IGDB05760	olig2	-5.03247	-7.85425	5.46004	6.46732	-0.281726	-0.0195415	3.38181	1.70654	-2.03727	-0.30473	FALSE	FALSE
M02815	IGDB09429	Mlx	9.20601	-5.05124	2.20742	6.83153	6.38659	5.19381	8.08432	4.9502	3.53992	2.84473	FALSE	FALSE
M02831	IGDB24970	hlfa	4.9391	-12.497	9.00699	27.2656	2.26201	0.71377	3.52716	1.79461	-1.72887	-0.435909	FALSE	FALSE
M02835	IGDB21901	NRL	-1.42164	1.01795	1.62935	1.00937	1.17674	1.28161	4.59908	2.36738	-0.421652	0.283609	FALSE	FALSE
M02853	IGDB00479	MAFG	-0.26805	1.90068	1.45949	6.98175	2.77913	2.68968	4.96602	3.41142	1.0881	0.976021	FALSE	FALSE
M02853	IGDB25149	mafk	-0.26805	1.90068	5.80884	4.06634	2.77913	2.68968	4.96602	3.41142	1.0881	0.976021	FALSE	FALSE
M02865	IGDB11449	Atf4	1.02007	-7.08681	99.4487	423.648	1.09894	0.633869	4.08435	2.202	-0.166699	0.205042	FALSE	FALSE
M02866	IGDB01306	creb5a	9.63036	-9.51009	5.72882	2.60336	4.77075	3.38611	8.20098	6.10694	6.04215	2.51118	FALSE	FALSE
M02868	IGDB15875	Dbp	5.70066	-9.77046	28.3658	5.21221	2.67457	1.06693	4.3055	1.89753	-0.927761	-0.526341	FALSE	FALSE
M02868	IGDB01327	Dbp	5.70066	-9.77046	3.3558	1.89075	2.67457	1.06693	4.3055	1.89753	-0.927761	-0.526341	FALSE	FALSE
M02872	IGDB03264	creb5b	9.43915	-8.31916	1.54538	2.39251	4.70783	3.49102	9.02399	7.50734	7.18933	2.934	FALSE	FALSE
M02877	IGDB19814	yy1a	1.17545	-4.48422	197.935	111.851	3.23803	2.81611	6.28355	4.24805	3.1733	3.08917	FALSE	FALSE
M02877	IGDB20626	YY2	1.17545	-4.48422	172.168	66.9335	3.23803	2.81611	6.28355	4.24805	3.1733	3.08917	FALSE	FALSE
M02878	IGDB21524	ctcf	-1.97801	-5.00666	396.958	81.1353	5.92411	5.93881	7.90315	9.85187	9.17651	6.26971	FALSE	FALSE
M02879	IGDB12444	sp4	9.95511	2.86492	2.43391	3.11192	5.81576	4.51672	10.3285	11.923	12.0813	5.63518	FALSE	FALSE
M02880	IGDB07664	ENSORLG00000003872	2.29601	11.9658	1.70228	1.27073	2.96388	3.42232	3.96148	2.53556	1.67301	1.30049	FALSE	FALSE
M02880	IGDB16273	glis1a	2.29601	11.9658	1.76462	1.23609	2.96388	3.42232	3.96148	2.53556	1.67301	1.30049	FALSE	FALSE
M02880	IGDB01666	ENSORLG00000007755	2.29601	11.9658	4.64796	3.30186	2.96388	3.42232	3.96148	2.53556	1.67301	1.30049	FALSE	FALSE
M02881	IGDB20226	Prdm4	-0.619581	4.69135	14.2592	13.0764	-0.277192	-0.111396	0.373754	0.72205	0.812122	-0.67825	FALSE	FALSE
M02881	IGDB20226	Prdm4	-0.619581	4.69135	14.2592	13.0764	-0.277192	-0.111396	0.373754	0.72205	0.812122	-0.67825	FALSE	FALSE
M02889	IGDB04109	Egr4	-0.0498265	2.26203	1.34613	1.11496	4.9665	5.0948	7.99855	6.60673	6.13343	4.41023	FALSE	FALSE
M02898	IGDB15715	sp8b	3.22666	5.89867	1.74259	33.4051	6.15114	5.28615	9.97098	9.37836	9.69785	5.44193	FALSE	FALSE
M02898	IGDB12445	SP8	3.22666	5.89867	1.15597	5.25037	6.15114	5.28615	9.97098	9.37836	9.69785	5.44193	FALSE	FALSE
M02901	IGDB22938	Zbtb49	-0.885639	-1.38785	19.5334	7.05997	1.09772	1.30074	3.24891	2.1786	1.47524	0.347017	FALSE	FALSE
M02901	IGDB22938	Zbtb49	-0.885639	-1.38785	19.5334	7.05997	1.09772	1.30074	3.24891	2.1786	1.47524	0.347017	FALSE	FALSE
M02902	IGDB25854	hic2	0.332025	0.934981	82.1433	25.5691	3.06894	3.04953	5.74127	3.0183	0.427659	1.57073	FALSE	FALSE
M02903	IGDB23702	klf13	8.32481	2.26014	12.4709	11.1953	5.02445	4.01057	7.14228	8.60484	7.62122	1.48976	FALSE	FALSE
M02904	IGDB12342	Zfp282	-0.312685	2.50233	3.55041	5.45329	1.5331	2.06087	4.43607	2.45337	0.655239	0.297114	FALSE	FALSE
M02904	IGDB15464	Zfp282	-0.312685	2.50233	77.933	27.5155	1.5331	2.06087	4.43607	2.45337	0.655239	0.297114	FALSE	FALSE
M02904	IGDB24180	Zfp282	-0.312685	2.50233	58.7021	10.2265	1.5331	2.06087	4.43607	2.45337	0.655239	0.297114	FALSE	FALSE
M02904	IGDB15468	Zfp282	-0.312685	2.50233	28.9654	20.4057	1.5331	2.06087	4.43607	2.45337	0.655239	0.297114	FALSE	FALSE
M02904	IGDB17787	Zfp282	-0.312685	2.50233	7.42536	7.20625	1.5331	2.06087	4.43607	2.45337	0.655239	0.297114	FALSE	FALSE
M02904	IGDB24919	Zfp282	-0.312685	2.50233	23.491	26.8606	1.5331	2.06087	4.43607	2.45337	0.655239	0.297114	FALSE	FALSE
M02910	IGDB19341	sp3a	9.18334	7.74232	5.10297	18.7608	5.71125	4.64336	9.84157	9.57524	7.51664	5.85313	FALSE	FALSE
M02910	IGDB19730	sp3b	9.18334	7.74232	94.2927	47.1191	5.71125	4.64336	9.84157	9.57524	7.51664	5.85313	FALSE	FALSE
M02912	IGDB18791	zic4	8.67179	16.8965	1.26506	1.95798	5.54704	5.44322	7.92384	5.96008	4.57056	5.04198	FALSE	FALSE
M02914	IGDB07694	zbtb7a	3.99771	0.28034	8.61836	2.32004	4.23521	3.90406	7.44549	6.39711	3.15064	3.99656	FALSE	FALSE
M02916	IGDB15099	zbtb18	-11.0566	-9.47271	14.357	6.69057	1.6017	1.64964	4.5197	2.29084	-0.419925	0.205915	FALSE	FALSE
M02920	IGDB01623	zbtb7c	4.25179	3.63059	2.03858	3.66373	4.15729	3.91766	6.70495	5.17617	3.12038	2.66977	FALSE	FALSE
M02929	IGDB15762	scrt1a	7.48045	3.03839	1.02762	1.01057	1.87861	1.27759	4.96146	3.05968	0.122876	0.727968	FALSE	FALSE
M02929	IGDB24695	scrt2	7.48045	3.03839	1.247	1.3328	1.87861	1.27759	4.96146	3.05968	0.122876	0.727968	FALSE	FALSE
M02929	IGDB15762	scrt1b	7.48045	3.03839	1.02762	1.01057	1.87861	1.27759	4.96146	3.05968	0.122876	0.727968	FALSE	FALSE
M02930	IGDB05791	Klf14	11.8336	0.785559	2.26803	1.08093	5.29992	4.48571	10.5956	10.9688	11.0117	6.94914	FALSE	FALSE
M02932	IGDB00286	Egr1	-4.56396	4.9748	1.0636	1.03212	5.29824	5.03647	7.36923	7.04818	6.4578	4.48095	FALSE	FALSE
M02938	IGDB09414	znf652	-3.16501	9.17513	11.431	5.52334	0.260104	0.685677	3.66127	2.78941	0.336353	0.683213	FALSE	FALSE
M02940	IGDB10127	cux2b	7.064	0.652285	1.45146	1.57068	-1.50246	-1.55037	0.650189	-0.134106	-1.72648	-1.35746	FALSE	FALSE
M02942	IGDB01847	onecut2	-1.65084	0.711267	1.39556	3.74257	-1.66027	-1.51352	2.05822	0.899958	-2.91263	-0.989867	FALSE	FALSE
M02943	IGDB21667	onecut1	0.197804	0.515018	1.35156	2.70977	-1.98	-1.56058	1.96845	0.890375	-2.8654	-1.1086	FALSE	FALSE
M02943	IGDB16093	onecutl	0.197804	0.515018	3.30465	7.38977	-1.98	-1.56058	1.96845	0.890375	-2.8654	-1.1086	FALSE	FALSE
M02945	IGDB07696	onecut3a	-2.60227	0.254062	3.27812	22.0639	-1.89844	-1.4602	1.77115	0.734626	-2.99241	-0.92129	FALSE	FALSE
M02945	IGDB03952	onecut3b	-2.60227	0.254062	1.83482	1.06492	-1.89844	-1.4602	1.77115	0.734626	-2.99241	-0.92129	FALSE	FALSE
M02946	IGDB02114	cux1a	2.67798	4.14998	8.12896	3.37067	-1.60026	-1.26484	2.90347	0.748493	-1.72017	-0.860442	FALSE	FALSE
M02952	IGDB24122	E2F1	1.72565	-4.26095	49.2785	11.6374	4.00969	3.7721	7.50849	6.62437	3.9036	5.05457	FALSE	FALSE
M02959	IGDB21226	e2f8	0.718576	0.259151	130.309	37.4425	0.953977	1.05769	3.62391	2.55878	0.912092	0.121436	FALSE	FALSE
M02960	IGDB20284	ENSORLG00000012301	-0.0535113	-2.32888	23.0727	37.0771	-0.642652	-0.568646	1.54423	-1.28059	2.71332	-1.31197	FALSE	FALSE
M02961	IGDB08761	e2f4	1.01323	0.812446	50.4976	18.9512	-0.347475	-0.279087	1.32399	-0.696227	3.72447	-1.54729	FALSE	FALSE
M02961	IGDB16973	e2f5	1.01323	0.812446	7.74362	2.14951	-0.347475	-0.279087	1.32399	-0.696227	3.72447	-1.54729	FALSE	FALSE
M02968	IGDB12580	ENSORLG00000007065	7.94102	-4.81597	96.8702	39.661	4.59463	4.11262	6.58796	6.921	5.99131	3.02361	FALSE	FALSE
M02968	IGDB03378	erfl3	7.94102	-4.81597	20.6331	10.1248	4.59463	4.11262	6.58796	6.921	5.99131	3.02361	FALSE	FALSE
M02969	IGDB23569	elk3	12.6331	-4.93789	4.75937	15.7868	5.83437	4.85805	7.05637	8.54735	7.47212	4.10643	FALSE	FALSE
M02969	IGDB20174	elk3	12.6331	-4.93789	1.43359	11.626	5.83437	4.85805	7.05637	8.54735	7.47212	4.10643	FALSE	FALSE
M03026	IGDB17863	foxi1	6.98461	4.3869	137.945	27.6461	0.96396	0.724943	4.30727	2.86877	-0.0286237	0.678661	FALSE	FALSE
M03026	IGDB06453	foxi3	6.98461	4.3869	1.62891	1.36227	0.96396	0.724943	4.30727	2.86877	-0.0286237	0.678661	FALSE	FALSE
M03026	IGDB00938	foxi3b	6.98461	4.3869	2.44107	9.6703	0.96396	0.724943	4.30727	2.86877	-0.0286237	0.678661	FALSE	FALSE
M03034	IGDB08728	foxl1	6.98461	4.3869	2.51442	1.25622	0.76322	0.576321	4.08673	2.86877	-0.0286237	0.525547	FALSE	FALSE
M03044	IGDB22175	foxd3	0.689662	-4.77468	1.48048	17.9522	-1.9563	-1.66635	1.06488	0.794325	-2.58031	-0.915986	FALSE	FALSE
M03055	IGDB22764	Foxj3	-1.7018	3.78331	4.78309	2.84136	0.917627	1.40673	4.35134	2.31887	-0.065458	-0.0361673	FALSE	FALSE
M03056	IGDB22764	Foxj3	2.2639	3.14488	4.78309	2.84136	-0.0752647	0.0646727	2.83425	1.40907	-2.28554	-0.593977	FALSE	FALSE
M03057	IGDB22764	Foxj3	8.93888	2.4081	4.78309	2.84136	1.1566	0.956225	3.68075	2.43067	-0.380669	0.167362	FALSE	FALSE
M03058	IGDB22764	Foxj3	-3.57246	-2.22995	4.78309	2.84136	-0.282242	-0.191769	2.69673	0.73375	-1.8406	-0.695029	FALSE	FALSE
M03078	IGDB01290	dlx6a	-4.78567	11.6285	2.16891	3.20649	1.02741	1.99371	4.3234	2.90455	-0.196964	0.0455291	FALSE	FALSE
M03103	IGDB03529	meox2a	-1.8873	11.1421	1.03551	1.14281	-0.0296806	0.44382	2.81803	1.55476	-1.74631	-0.50384	FALSE	FALSE
M03150	IGDB26309	ENSORLG00000018971	0.116591	7.22283	1	1.90857	-0.903849	-0.136225	1.67235	3.10676	-1.6528	-0.201504	FALSE	FALSE
M03199	IGDB02974	drgx	-4.37934	4.27677	1.7076	1.41707	-2.9435	-2.64233	0.958436	0.937944	-2.68577	-0.864465	FALSE	FALSE
M03231	IGDB02194	sebox	-1.77748	13.8989	37.5222	6.17589	-0.727973	-0.25146	2.36474	1.47539	-3.46795	-0.610423	FALSE	FALSE
M03231	IGDB06910	mixl1	-1.77748	13.8989	5.36432	1	-0.727973	-0.25146	2.36474	1.47539	-3.46795	-0.610423	FALSE	FALSE
M03233	IGDB17221	ENSORLG00000006060	1.3982	8.21507	7.03078	2.51823	0.412292	0.758476	3.05447	1.82215	-1.63224	-0.130951	FALSE	FALSE
M03233	IGDB15146	hmx3a	1.3982	8.21507	1.92219	2.64411	0.412292	0.758476	3.05447	1.82215	-1.63224	-0.130951	FALSE	FALSE
M03233	IGDB04847	HMX3	1.3982	8.21507	3.64769	3.95487	0.412292	0.758476	3.05447	1.82215	-1.63224	-0.130951	FALSE	FALSE
M03233	IGDB00556	hmx1	1.3982	8.21507	1.07317	1.64311	0.412292	0.758476	3.05447	1.82215	-1.63224	-0.130951	FALSE	FALSE
M03310	IGDB00329	Pou4f2	0.734405	-5.64375	1.16136	1.01424	-0.587113	-0.732886	3.12508	1.29676	-1.40834	-0.772809	FALSE	FALSE
M03312	IGDB07328	pou4f1	-0.176822	-11.0016	1.19574	1.08051	-1.0119	-1.0233	2.42306	1.30483	-1.12105	-0.827446	FALSE	FALSE
M03322	IGDB12579	Pou2f2	5.4016	-7.35379	2.18166	2.08885	-0.545251	-1.23663	4.6478	1.18058	-1.44742	-0.495482	FALSE	FALSE
M03322	IGDB15951	Pou2f2	5.4016	-7.35379	8.17003	2.103	-0.545251	-1.23663	4.6478	1.18058	-1.44742	-0.495482	FALSE	FALSE
M03323	IGDB12579	Pou2f2	19.2261	-2.53778	2.18166	2.08885	2.17283	0.510073	4.13603	2.81819	0.242082	0.443114	FALSE	FALSE
M03323	IGDB15951	Pou2f2	19.2261	-2.53778	8.17003	2.103	2.17283	0.510073	4.13603	2.81819	0.242082	0.443114	FALSE	FALSE
M03329	IGDB12353	hsf1	2.36044	-3.09134	48.1977	39.8026	0.783939	0.888828	4.73759	1.94637	-0.150752	-0.180633	FALSE	FALSE
M03329	IGDB23909	hsf4	2.36044	-3.09134	2.02447	5.42581	0.783939	0.888828	4.73759	1.94637	-0.150752	-0.180633	FALSE	FALSE
M03334	IGDB03999	irf4a	4.68463	-3.11908	1.14439	1.35398	0.370264	0.208571	2.77729	0.272099	-0.168346	-0.801512	FALSE	FALSE
M03335	IGDB07411	irf8	2.8074	-2.32956	17.5022	4.14742	0.52304	0.342596	4.19755	2.24164	0.0988663	-0.413323	FALSE	FALSE
M03335	IGDB24567	irf10	2.8074	-2.32956	10.9761	1.43725	0.52304	0.342596	4.19755	2.24164	0.0988663	-0.413323	FALSE	FALSE
M03340	IGDB07498	mef2ab	-5.53391	-8.89862	6.17485	2.58742	-0.42607	-0.0627	3.17849	1.92726	-0.999835	-0.418975	FALSE	FALSE
M03340	IGDB23749	mef2aa	-5.53391	-8.89862	3.23092	8.49503	-0.42607	-0.0627	3.17849	1.92726	-0.999835	-0.418975	FALSE	FALSE
M03363	IGDB23224	vdr	-0.204463	3.41815	17.7034	10.0248	1.60179	1.70825	4.00961	2.11342	0.429204	0.191282	FALSE	FALSE
M03363	IGDB08857	vdralpha	-0.204463	3.41815	11.3136	14.4465	1.60179	1.70825	4.00961	2.11342	0.429204	0.191282	FALSE	FALSE
M03368	IGDB04932	thra	0.750027	4.83129	4.75303	4.66949	1.76914	1.87267	2.99419	1.99408	0.643757	0.214187	FALSE	FALSE
M03368	IGDB09736	THRA	0.750027	4.83129	1.12874	1.08006	1.76914	1.87267	2.99419	1.99408	0.643757	0.214187	FALSE	FALSE
M03379	IGDB01366	thrb	2.29753	5.80373	2.73516	2.0349	2.14957	2.38757	3.00157	2.54097	0.777469	0.466902	FALSE	FALSE
M03439	IGDB17234	tp53	0.959286	-2.88323	177.514	119.796	1.66741	1.46445	4.51131	1.41814	-0.334396	0.311939	FALSE	FALSE
M03442	IGDB06392	pax1	-2.37968	1.52093	1.04884	12.3893	2.4529	3.16999	5.52319	2.66885	0.951061	0.877876	FALSE	FALSE
M03444	IGDB06141	Pax9	-2.47536	2.08576	1.0888	2.31554	0.453685	1.46653	3.66308	0.100173	0.418812	0.232703	FALSE	FALSE
M03445	IGDB04294	prox1b	2.6377	0.512065	2.46934	1.84479	2.33467	2.19418	5.2206	2.51417	0.237383	0.175661	FALSE	FALSE
M03445	IGDB06341	prox2	2.6377	0.512065	1.5176	3.01845	2.33467	2.19418	5.2206	2.51417	0.237383	0.175661	FALSE	FALSE
M03445	IGDB05232	ENSORLG00000001996	2.6377	0.512065	1.23149	1.31658	2.33467	2.19418	5.2206	2.51417	0.237383	0.175661	FALSE	FALSE
M03445	IGDB20807	prox1a	2.6377	0.512065	1.2368	2.00664	2.33467	2.19418	5.2206	2.51417	0.237383	0.175661	FALSE	FALSE
M03445	IGDB06824	Prox2	2.6377	0.512065	1.04112	1.07788	2.33467	2.19418	5.2206	2.51417	0.237383	0.175661	FALSE	FALSE
M03448	IGDB01020	nfkb1	-0.00256796	5.70465	75.0207	18.6641	2.753	2.94777	3.73087	2.69437	1.18577	1.73677	FALSE	FALSE
M03454	IGDB22147	rfx2	-8.78804	-0.72462	6.92894	19.339	3.63482	3.92054	6.3881	6.18847	5.82042	3.6091	FALSE	FALSE
M03458	IGDB12327	ENSORLG00000001269	-9.13119	-1.24157	4.37976	3.25547	3.58458	4.02081	6.23555	6.08534	5.77687	4.09955	FALSE	FALSE
M03475	IGDB11123	NFIX	-6.76318	-6.32041	1.26902	1.2047	2.56858	2.69845	5.88404	3.33587	0.622606	1.33088	FALSE	FALSE
M03480	IGDB17180	NFIB	-5.71605	-6.19609	2.27514	2.66958	1.36892	1.52544	3.75437	3.46868	1.03231	0.878456	FALSE	FALSE
M03497	IGDB19373	sox21	2.35966	5.98419	117.465	56.5257	-0.997004	-0.595054	1.52185	0.391273	-1.24888	-0.715074	FALSE	FALSE
M03535	IGDB00224	Sox10	0.973437	1.34649	1.06648	10.9379	-1.72428	-1.15257	-1.25349	-1.80757	-0.760012	-1.61043	FALSE	FALSE
M03536	IGDB00224	Sox10	1.44016	2.99973	1.06648	10.9379	-2.9594	-2.38438	-1.74935	-2.85918	-1.40956	-2.49024	FALSE	FALSE
M03537	IGDB00224	Sox10	-0.92433	-1.6789	1.06648	10.9379	-1.85498	-1.51518	-1.75509	-2.48707	-0.988855	-2.43855	FALSE	FALSE
M03554	IGDB18977	tbx15	2.5431	4.05898	2.35696	1.11357	0.141049	-0.124246	0.407548	-1.39322	0.215336	-0.659102	FALSE	FALSE
M03562	IGDB05192	tbx19	2.57221	4.28486	2.58327	1	0.363782	0.576353	3.87059	1.85737	-0.589559	0.306554	FALSE	FALSE
M03565	IGDB16179	tbx20	-0.310437	2.07364	43.0174	13.9485	2.91573	2.46356	5.36825	2.63369	-0.0516636	0.637484	FALSE	FALSE
M03575	IGDB22862	tead3b	-6.35144	1.08556	7.97323	37.7366	1.01788	1.92876	3.93933	3.81694	1.33602	0.594772	FALSE	FALSE
M03577	IGDB23313	tead1a	-8.36479	8.07142	30.7392	57.4582	1.51489	2.16583	4.33423	3.29613	0.795046	0.824575	FALSE	FALSE
M03579	IGDB23518	TEAD4	-7.7548	7.88959	2.80272	23.5181	1.70657	2.63297	4.53382	3.20391	0.888425	0.897796	FALSE	FALSE
M03761	IGDB01258	trps1	-1.61973	7.73133	3.21667	3.19054	2.2271	2.89336	5.62424	3.70306	2.16299	1.88508	FALSE	FALSE
M03840	IGDB07971	rx1	-6.74101	10.0851	1	1.39186	1.79269	2.90129	4.82885	3.07895	0.149298	0.717914	FALSE	FALSE
M04008	IGDB09752	nfe2l1a	-3.48549	-6.08412	3.20409	2.82767	2.30566	2.21371	5.0199	3.12214	-0.0900804	0.63174	FALSE	FALSE
M04008	IGDB17980	nfe2l1b	-3.48549	-6.08412	8.29025	7.47463	2.30566	2.21371	5.0199	3.12214	-0.0900804	0.63174	FALSE	FALSE
M04008	IGDB12482	nfe2l3	-3.48549	-6.08412	18.2331	20.9234	2.30566	2.21371	5.0199	3.12214	-0.0900804	0.63174	FALSE	FALSE
M04018	IGDB22473	atf6	6.11054	-4.12397	212.762	30.449	4.03087	3.63913	6.77059	4.59498	1.9244	2.57154	FALSE	FALSE
M04050	IGDB12682	tfap2e	-4.00626	5.6111	1.38712	2.73027	4.84762	5.33747	7.63384	5.40358	6.07103	5.13046	FALSE	FALSE
M04056	IGDB00168	ZBED1	2.48087	-3.17723	6.26786	19.6732	-0.39077	-0.335231	3.57326	0.480427	2.49895	-0.504425	FALSE	FALSE
M04057	IGDB00168	ZBED1	3.17759	-3.83078	6.26786	19.6732	2.18053	1.86097	5.89164	4.76186	2.951	1.29753	FALSE	FALSE
M04076	IGDB16049	USF2	7.70146	-5.12113	5.4054	64.5889	5.68497	4.89241	7.65207	5.89613	5.1884	3.29003	FALSE	FALSE
M04076	IGDB14118	usf1	7.70146	-5.12113	31.6141	47.4494	5.68497	4.89241	7.65207	5.89613	5.1884	3.29003	FALSE	FALSE
M04076	IGDB12654	usf2	7.70146	-5.12113	81.3257	40.5595	5.68497	4.89241	7.65207	5.89613	5.1884	3.29003	FALSE	FALSE
M04098	IGDB08330	myog	-5.30846	-7.27138	1	1.24573	3.34058	3.20052	6.26371	3.5472	1.81883	1.68337	FALSE	FALSE
M04116	IGDB07167	myod1	-4.88707	-6.56402	1	1	2.47123	2.32127	4.99493	2.79458	0.389452	0.854047	FALSE	FALSE
M04116	IGDB23420	myod1	-4.88707	-6.56402	1.29343	1.16017	2.47123	2.32127	4.99493	2.79458	0.389452	0.854047	FALSE	FALSE
M04139	IGDB16843	Hes6	-0.0998368	-5.36771	1.36022	3.13824	3.57749	3.36325	6.48927	3.48337	0.666177	1.81557	FALSE	FALSE
M04139	IGDB14120	Hes6	-0.0998368	-5.36771	2.46512	62.4758	3.57749	3.36325	6.48927	3.48337	0.666177	1.81557	FALSE	FALSE
M04148	IGDB19048	neurod1	-7.08455	-6.59429	3.33616	1.53435	-0.812002	-0.636856	2.912	0.854598	-1.55885	-0.364792	FALSE	FALSE
M04148	IGDB24405	neurod4	-7.08455	-6.59429	1.31472	3.14767	-0.812002	-0.636856	2.912	0.854598	-1.55885	-0.364792	FALSE	FALSE
M04148	IGDB22660	Neurod4	-7.08455	-6.59429	1	1.1195	-0.812002	-0.636856	2.912	0.854598	-1.55885	-0.364792	FALSE	FALSE
M04150	IGDB11480	hand2	13.2218	1.98161	1.02576	11.6502	2.23211	1.30698	5.60813	2.57208	0.0703145	0.967281	FALSE	FALSE
M04156	IGDB03835	ptf1a	-1.4719	-3.35246	1.42686	1	3.52313	3.2145	6.10132	3.19694	1.25951	1.43827	FALSE	FALSE
M04193	IGDB03054	atoh7	-12.671	-7.97931	1.04607	1	0.315652	0.506387	3.95177	1.70019	-2.14752	-0.0939785	FALSE	FALSE
M04247	IGDB21079	bach2b	-1.97215	-2.40853	1.22748	3.99442	1.82834	1.81919	4.55115	2.84354	0.00909228	0.317235	FALSE	FALSE
M04247	IGDB14362	ENSORLG00000004475	-1.97215	-2.40853	1.1059	2.51531	1.82834	1.81919	4.55115	2.84354	0.00909228	0.317235	FALSE	FALSE
M04272	IGDB02122	fosb	9.95698	-8.84098	3.14933	1.65888	4.72918	3.38911	8.75126	6.55455	6.14718	3.13816	FALSE	FALSE
M04277	IGDB21901	NRL	-1.06216	0.324988	1.62935	1.00937	1.65097	1.78771	4.87765	2.54992	0.0382492	0.553962	FALSE	FALSE
M04278	IGDB21901	NRL	-2.75657	-0.276509	1.62935	1.00937	1.91326	2.0007	5.05339	2.80884	0.17035	0.611443	FALSE	FALSE
M04279	IGDB21901	NRL	-2.1417	0.142353	1.62935	1.00937	1.09993	1.3638	4.45375	2.39814	-0.585647	0.163345	FALSE	FALSE
M04280	IGDB21901	NRL	-2.68139	0.499492	1.62935	1.00937	1.28114	1.42713	4.50969	2.49168	-0.860768	0.273622	FALSE	FALSE
M04293	IGDB03951	creb3l3b	12.289	-7.77715	1	6.54524	6.03377	4.78603	9.44121	7.7998	7.40312	4.43406	FALSE	FALSE
M04293	IGDB21975	creb3l3a	12.289	-7.77715	2.0804	75.8975	6.03377	4.78603	9.44121	7.7998	7.40312	4.43406	FALSE	FALSE
M04327	IGDB11845	fosl1a	9.48739	-8.3947	20.4882	6.35462	3.95798	2.98305	8.14239	6.31195	5.72353	3.14627	FALSE	FALSE
M04327	IGDB20998	si:ch211-153j24.3	9.48739	-8.3947	1.20709	1.21263	3.95798	2.98305	8.14239	6.31195	5.72353	3.14627	FALSE	FALSE
M04327	IGDB20997	fosab	9.48739	-8.3947	69.6252	35.3588	3.95798	2.98305	8.14239	6.31195	5.72353	3.14627	FALSE	FALSE
M04327	IGDB19874	fosaa	9.48739	-8.3947	1.43082	1.36361	3.95798	2.98305	8.14239	6.31195	5.72353	3.14627	FALSE	FALSE
M04329	IGDB11618	junba	9.23912	-8.52298	1.90487	1.73152	5.20746	3.94159	9.20097	7.01105	6.37905	3.08462	FALSE	FALSE
M04329	IGDB25605	junbb	9.23912	-8.52298	21.1427	33.094	5.20746	3.94159	9.20097	7.01105	6.37905	3.08462	FALSE	FALSE
M04343	IGDB08670	mafb	-2.99707	-0.58088	1	1.10085	3.15782	3.00332	5.92555	3.71324	2.76073	2.02531	FALSE	FALSE
M04400	IGDB18599	klf6a	15.3377	-1.49665	4.70864	23.2171	5.38664	3.84532	9.43774	8.4059	2.99028	4.67941	FALSE	FALSE
M04412	IGDB21499	ZNF821	-6.08557	0.86788	11.6742	5.28695	2.65527	2.52841	6.14626	2.17797	2.27603	1.26755	FALSE	FALSE
M04413	IGDB21499	ZNF821	-5.02588	-0.467365	11.6742	5.28695	2.67921	2.78141	6.26543	2.53368	3.05238	1.98135	FALSE	FALSE
M04414	IGDB08885	Zfp174	2.89966	1.10116	3.66729	3.57099	3.332	3.29401	5.96333	3.68822	2.50894	2.0395	FALSE	FALSE
M04414	IGDB17115	Zfp174	2.89966	1.10116	72.671	25.2509	3.332	3.29401	5.96333	3.68822	2.50894	2.0395	FALSE	FALSE
M04414	IGDB24848	Zfp174	2.89966	1.10116	27.3054	13.4809	3.332	3.29401	5.96333	3.68822	2.50894	2.0395	FALSE	FALSE
M04433	IGDB00083	Zbtb45	4.3441	2.12845	2.57587	3.09865	2.15358	1.60493	4.16106	2.45861	-0.409498	0.298251	FALSE	FALSE
M04451	IGDB12572	Zfp384	-3.08467	-0.780633	13.3527	16.2126	-1.92548	-1.65104	1.73992	1.0043	-2.18687	-0.947145	FALSE	FALSE
M04451	IGDB15934	Zfp384	-3.08467	-0.780633	47.9233	27.513	-1.92548	-1.65104	1.73992	1.0043	-2.18687	-0.947145	FALSE	FALSE
M04489	IGDB15540	Klf10	-4.92915	6.66055	12.7459	2.72382	4.45007	4.84314	4.49014	6.38541	7.74366	3.706	FALSE	FALSE
M04511	IGDB08257	si:ch211-117k10.3	3.58079	8.09045	9.71416	4.53371	5.46933	5.02257	9.97249	8.11958	8.17975	6.46168	FALSE	FALSE
M04511	IGDB24133	klf15	3.58079	8.09045	9.88489	2.27131	5.46933	5.02257	9.97249	8.11958	8.17975	6.46168	FALSE	FALSE
M04521	IGDB15530	osr2	0.0218571	1.06677	4.80828	21.0291	1.82686	1.83777	4.98527	2.48276	-0.379708	0.72363	FALSE	FALSE
M04525	IGDB10946	sp2	-0.10654	6.92584	11.5717	17.7576	5.37429	4.50714	9.89961	9.18592	9.9776	5.77635	FALSE	FALSE
M04543	IGDB13771	Zfp296	1.49668	10.5993	6.77709	1.71353	2.47805	2.54808	5.83623	3.08334	0.598042	0.57766	FALSE	FALSE
M04547	IGDB26369	si:ch211-236k19.4	2.60812	0.512974	2.4658	11.8853	0.191181	0.396208	3.56453	1.68041	-1.97212	-0.644553	FALSE	FALSE
M04549	IGDB24848	Zfp110	1.42752	0.147662	27.3054	13.4809	1.6732	1.69102	5.25812	2.2628	0.582124	0.225006	FALSE	FALSE
M04549	IGDB17115	Zfp110	1.42752	0.147662	72.671	25.2509	1.6732	1.69102	5.25812	2.2628	0.582124	0.225006	FALSE	FALSE
M04549	IGDB08885	Zfp110	1.42752	0.147662	3.66729	3.57099	1.6732	1.69102	5.25812	2.2628	0.582124	0.225006	FALSE	FALSE
M04568	IGDB13716	hic1	-2.55285	2.2244	1.05048	1.06791	2.4894	2.4498	5.49832	3.00107	0.975833	1.86006	FALSE	FALSE
M04589	IGDB15026	Zfp771	1.90591	3.0747	96.0391	20.3172	1.70679	1.75009	4.15588	2.80564	0.888761	0.385634	FALSE	FALSE
M04595	IGDB20795	zbtb2b	7.20254	-4.29379	49.0693	30.2245	3.58199	2.71549	6.2122	4.83486	2.56857	2.12133	FALSE	FALSE
M04599	IGDB14463	Zbtb20	1.49116	-4.2116	1.86521	1.04941	-0.256004	-0.509803	2.52408	1.10135	-2.43403	-0.491188	FALSE	FALSE
M04603	IGDB07882	zbtb37	1.5534	-3.17378	1.22276	4.8004	3.75032	3.41905	5.38632	5.88242	3.40149	4.28086	FALSE	FALSE
M04645	IGDB19343	SP9	5.89811	3.20486	7.50809	6.44294	6.06326	5.2895	10.4876	10.7943	9.97167	7.82907	FALSE	FALSE
M04651	IGDB01338	zbtb22b	2.08022	1.46613	1.39608	3.9652	0.0721772	0.0906652	2.82701	1.7739	-0.404319	-0.100779	FALSE	FALSE
M04661	IGDB17231	ENSORLG00000006269	1.76808	1.3866	1444.52	171.322	2.16162	1.85875	5.31523	2.4788	-0.224839	0.582385	FALSE	FALSE
M04661	IGDB24271	ybx1	1.76808	1.3866	760.395	1402.72	2.16162	1.85875	5.31523	2.4788	-0.224839	0.582385	FALSE	FALSE
M04663	IGDB20747	LIN28B	3.91811	-3.94927	6.91544	16.6162	5.18999	4.3878	7.92859	7.77279	7.37826	5.64068	FALSE	FALSE
M04663	IGDB16000	LIN28A	3.91811	-3.94927	21.2199	104.004	5.18999	4.3878	7.92859	7.77279	7.37826	5.64068	FALSE	FALSE
M04817	IGDB06201	foxa1	-1.84243	1.97905	1.73034	1.87194	0.864222	0.743534	3.04346	1.91182	-1.05146	0.0266446	FALSE	FALSE
M04823	IGDB04000	foxq1a	0.281123	-3.61145	1.6058	1	-1.09792	-0.876711	1.98136	1.29021	-2.39862	-0.486443	FALSE	FALSE
M04831	IGDB13575	foxa3	2.1761	2.90492	13.022	18.9973	-0.668576	-0.464192	2.69596	1.09493	0.539776	-0.191282	FALSE	FALSE
M04845	IGDB11292	foxe1	-3.23513	2.88148	1.27674	1.47673	-0.352176	-0.0197853	2.77765	1.23195	-1.95765	-0.171452	FALSE	FALSE
M04847	IGDB02313	foxl2	2.90046	-1.05317	1.31112	7.02249	1.64615	1.3737	4.13146	1.52572	-0.0788796	0.128998	FALSE	FALSE
M04857	IGDB21167	FOXR2	-6.99099	-5.90637	6.24468	1.29494	-3.44338	-4.36659	1.47267	-0.085981	-4.55405	-1.08176	FALSE	FALSE
M04858	IGDB21167	FOXR2	-7.05375	-7.51801	6.24468	1.29494	-2.7833	-3.49851	1.54621	-0.156322	-4.06407	-0.937781	FALSE	FALSE
M04879	IGDB23111	gata-1	-1.58448	2.15895	1.14851	4.16892	2.07005	2.79293	5.26606	3.57028	1.87096	1.92897	FALSE	FALSE
M05057	IGDB09751	HOXB1	-2.75653	11.671	1.04864	7.48954	-0.322752	0.160488	2.93274	1.5411	-1.60691	-0.553562	FALSE	FALSE
M05184	IGDB14856	nkx6.2	-0.0621411	10.9046	1.74048	37.1519	-0.448077	-0.185914	2.74694	1.59698	-1.61237	-0.458644	FALSE	FALSE
M05233	IGDB00795	TLX3	2.27639	7.92111	1.761	1.32136	-0.746979	-0.302252	2.29837	1.81877	-1.82075	-0.624734	FALSE	FALSE
M05233	IGDB02776	tlx1	2.27639	7.92111	1.18759	1	-0.746979	-0.302252	2.29837	1.81877	-1.82075	-0.624734	FALSE	FALSE
M05273	IGDB19353	ENSORLG00000017548	-4.69807	11.7665	1.19432	8.05878	1.31609	2.01676	4.04959	2.12093	-0.777439	0.175287	FALSE	FALSE
M05331	IGDB24433	hoxc8	-0.18344	2.75884	1.86944	7.37937	-0.18096	0.511442	4.10659	1.59722	-1.11552	-0.242501	FALSE	FALSE
M05519	IGDB14614	Hsf5	1.13188	-1.65376	25.4658	2.2725	0.549578	0.49393	4.08693	1.8805	-0.014458	-0.491124	FALSE	FALSE
M05589	IGDB22049	nr5a2	2.54751	-0.510237	1.92932	1.71106	3.01303	2.84576	4.9093	3.02028	0.38204	0.651654	FALSE	FALSE
M05597	IGDB23572	nr2c1	0.730235	5.2352	72.7187	16.1786	3.43167	3.56226	5.73177	3.58575	1.90006	1.88782	FALSE	FALSE
M05601	IGDB23163	nr4a1	-4.67306	9.76095	1.8324	1.38743	1.54937	2.47316	4.7057	2.53027	-0.695771	0.57729	FALSE	FALSE
M05601	IGDB24708	NR4A1	-4.67306	9.76095	3.88079	1.95866	1.54937	2.47316	4.7057	2.53027	-0.695771	0.57729	FALSE	FALSE
M05613	IGDB09459	nr5a5	-4.08336	-8.62908	1.19223	1.15335	1.7248	1.61527	5.17656	2.79777	0.616198	0.75995	FALSE	FALSE
M05627	IGDB10159	nr6a1a	-3.19882	-15.8394	122.44	99.959	1.37322	0.932761	4.26647	2.37582	0.252931	-0.271489	FALSE	FALSE
M05659	IGDB23153	nr1d4b	-5.2935	5.79814	3.4659	5.7632	1.8628	2.31928	4.46401	2.19262	-0.461693	0.302476	FALSE	FALSE
M05659	IGDB16159	nr1d2a	-5.2935	5.79814	22.4175	9.1729	1.8628	2.31928	4.46401	2.19262	-0.461693	0.302476	FALSE	FALSE
M05659	IGDB08997	nr1d4a	-5.2935	5.79814	1.02176	1.044	1.8628	2.31928	4.46401	2.19262	-0.461693	0.302476	FALSE	FALSE
M05659	IGDB01367	nr1d2b	-5.2935	5.79814	32.8068	7.98617	1.8628	2.31928	4.46401	2.19262	-0.461693	0.302476	FALSE	FALSE
M05685	IGDB13169	pax8	-2.12644	2.91583	1.52968	24.2212	3.90488	4.38178	6.68678	4.69861	1.55342	3.33451	FALSE	FALSE
M05743	IGDB12157	SMAD5	-0.536472	-1.78241	127.625	66.7933	2.54026	2.13334	5.66002	3.07256	0.720792	0.689674	FALSE	FALSE
M05744	IGDB12157	SMAD5	2.45621	-1.45114	127.625	66.7933	2.55685	2.49359	6.01768	3.59931	1.72193	0.849852	FALSE	FALSE
M05763	IGDB02494	bbx	2.58116	-0.567687	1.84674	5.11717	1.69346	1.43654	4.93723	2.56702	-0.415513	0.144944	FALSE	FALSE
M05797	IGDB20651	tbx18	12.8827	10.6535	1.1393	3.58872	4.30106	3.5846	6.39495	3.28219	0.260893	1.29067	FALSE	FALSE
M05809	IGDB12846	me-t	6.92834	1.89738	64.2849	82.9053	1.97333	1.50845	4.68843	1.7236	-0.974934	0.249541	FALSE	FALSE
M05809	IGDB03017	tb	6.92834	1.89738	1.18501	9.86127	1.97333	1.50845	4.68843	1.7236	-0.974934	0.249541	FALSE	FALSE
M05833	IGDB09294	Tfe3	10.2415	-5.07466	2.51981	3.00638	6.06675	4.90121	7.27044	6.72186	6.01263	3.17351	FALSE	FALSE
M05860	IGDB00286	Egr1	4.2917	1.32123	1.0636	1.03212	5.98519	5.5643	8.83152	9.28646	9.38267	6.33396	FALSE	FALSE
M05886	IGDB12018	nr3c1	-0.0308778	-3.59702	2.82054	6.74569	0.980816	0.825125	3.95311	2.40688	-0.637497	-0.0821544	FALSE	FALSE
M05889	IGDB25981	smad4a	0.405228	1.93303	8.0521	13.3267	1.29625	1.37105	4.99941	2.41091	-0.151143	0.223981	FALSE	FALSE
M05889	IGDB13191	SMAD4	0.405228	1.93303	72.1342	34.3211	1.29625	1.37105	4.99941	2.41091	-0.151143	0.223981	FALSE	FALSE
M05958	IGDB02490	ENSORLG00000005403	3.49814	-4.38904	1.15175	1.16868	3.45776	2.8797	6.44729	3.86771	1.43421	1.50492	FALSE	FALSE
M06305	IGDB12869	irx1b	-0.488928	-4.83305	20.8973	34.0069	-4.13063	-4.04118	2.45414	1.53125	-0.633858	-0.6987	FALSE	FALSE
M06305	IGDB01481	irx4b	-0.488928	-4.83305	3.52795	1.36542	-4.13063	-4.04118	2.45414	1.53125	-0.633858	-0.6987	FALSE	FALSE
M06354	IGDB06505	noto	-1.96513	14.3499	61.2357	11.2867	-3.73886	-3.72588	2.30961	0.968707	-0.352189	0.0849121	FALSE	FALSE
M06465	IGDB18499	plag1	-8.27144	12.5199	5.24433	1.86922	3.82917	4.59421	5.92607	4.92669	3.45868	2.94343	FALSE	FALSE
M07562	IGDB08885	Zkscan2	-2.86444	-5.21967	3.66729	3.57099	-1.63473	-1.71984	3.937	1.83466	-2.70953	-0.271428	FALSE	FALSE
M07562	IGDB17115	Zkscan2	-2.86444	-5.21967	72.671	25.2509	-1.63473	-1.71984	3.937	1.83466	-2.70953	-0.271428	FALSE	FALSE
M07562	IGDB24848	Zkscan2	-2.86444	-5.21967	27.3054	13.4809	-1.63473	-1.71984	3.937	1.83466	-2.70953	-0.271428	FALSE	FALSE
M07566	IGDB25097	Zfp324	-2.53628	5.69537	403.324	1.74995	2.0396	1.91076	5.32787	2.9135	-5.45047	1.19062	FALSE	FALSE
M07572	IGDB02517	ZNF419	-1.1289	5.95455	16.7656	37.6443	3.03216	3.06631	5.06628	3.68813	2.32495	1.86768	FALSE	FALSE
M07576	IGDB02517	ZNF549	-5.89314	0.078591	16.7656	37.6443	3.08018	3.12001	5.09878	3.4849	1.14887	1.73569	FALSE	FALSE
M07577	IGDB24286	ZNF211	0.21031	-1.2114	16.396	4.71579	0.16326	0.108005	2.70716	1.41762	-1.8826	-0.168046	FALSE	FALSE
M07587	IGDB02517	ZNF304	-5.42814	2.72299	16.7656	37.6443	5.48825	5.45263	9.26069	8.0785	8.8055	6.87995	FALSE	FALSE
M07602	IGDB24848	Zkscan6	0.855295	4.7393	27.3054	13.4809	3.3317	3.07497	6.39772	3.58928	0.769885	2.16067	FALSE	FALSE
M07602	IGDB08885	Zkscan6	0.855295	4.7393	3.66729	3.57099	3.3317	3.07497	6.39772	3.58928	0.769885	2.16067	FALSE	FALSE
M07602	IGDB17115	Zkscan6	0.855295	4.7393	72.671	25.2509	3.3317	3.07497	6.39772	3.58928	0.769885	2.16067	FALSE	FALSE
M07609	IGDB17115	Zkscan17	-1.11449	0.0501338	72.671	25.2509	-3.12659	-3.05368	-3.63468	-3.01107	-0.0846203	-1.83009	FALSE	FALSE
M07609	IGDB24848	Zkscan17	-1.11449	0.0501338	27.3054	13.4809	-3.12659	-3.05368	-3.63468	-3.01107	-0.0846203	-1.83009	FALSE	FALSE
M07609	IGDB08885	Zkscan17	-1.11449	0.0501338	3.66729	3.57099	-3.12659	-3.05368	-3.63468	-3.01107	-0.0846203	-1.83009	FALSE	FALSE
M07615	IGDB08885	Zfp641	-9.31008	13.4613	3.66729	3.57099	1.41106	1.63578	4.92989	0.521997	1.03123	-0.755396	FALSE	FALSE
M07615	IGDB17115	Zfp641	-9.31008	13.4613	72.671	25.2509	1.41106	1.63578	4.92989	0.521997	1.03123	-0.755396	FALSE	FALSE
M07615	IGDB24848	Zfp641	-9.31008	13.4613	27.3054	13.4809	1.41106	1.63578	4.92989	0.521997	1.03123	-0.755396	FALSE	FALSE
M07616	IGDB02517	ZNF610	2.31676	-2.25993	16.7656	37.6443	5.85095	5.39062	8.72791	9.54802	8.23427	7.14241	FALSE	FALSE
M07625	IGDB15956	Zfp212	-24.0876	7.71107	63.8558	25.826	0.629637	1.56653	5.35683	-1.83043	0.214621	-0.808015	FALSE	FALSE
M07629	IGDB02517	ZNF562	-2.20391	2.51028	16.7656	37.6443	-0.952475	-0.659069	0.724347	0.00439034	0.100393	-0.986379	FALSE	FALSE
M07630	IGDB02517	ZNF561	-5.89285	-4.66431	16.7656	37.6443	-1.34093	-1.59221	4.70343	2.71041	0.935158	0.847117	FALSE	FALSE
M07631	IGDB02517	ZNF584	2.76162	-1.45284	16.7656	37.6443	-1.81468	-1.58574	1.59263	1.14699	-1.61372	-0.77127	FALSE	FALSE
M07642	IGDB09879	ZNF519	-5.68059	-2.44494	1.53298	1.80945	6.32842	5.64459	9.65755	9.94809	10.132	7.30986	FALSE	FALSE
M07655	IGDB02517	ZNF552	-2.33361	1.83574	16.7656	37.6443	4.34958	4.30972	6.94437	5.57325	4.56335	3.43795	FALSE	FALSE
M07656	IGDB02517	ZNF154	3.57296	1.35255	16.7656	37.6443	0.731739	0.772345	3.6813	2.22854	-1.37731	-0.257827	FALSE	FALSE
M07660	IGDB02517	ZNF792	4.27298	0.00408264	16.7656	37.6443	0.734665	0.322518	1.74433	0.478431	12.3734	2.91392	FALSE	FALSE
M07688	IGDB02517	ZNF793	-0.687328	2.89894	16.7656	37.6443	3.11417	3.38757	6.64785	4.14156	2.53477	2.29432	FALSE	FALSE
M07691	IGDB02517	ZNF548	-4.75564	1.75717	16.7656	37.6443	5.53038	5.47959	8.29481	7.19866	4.42698	5.39503	FALSE	FALSE
M07712	IGDB02517	ZNF418	2.0269	-2.9642	16.7656	37.6443	-3.21306	-3.44629	-0.520766	-0.0119086	-3.47008	-1.77426	FALSE	FALSE
M07714	IGDB09879	ZNF429	-1.44302	6.61759	1.53298	1.80945	3.58563	3.70558	6.45021	3.78697	0.948594	2.16839	FALSE	FALSE
M07745	IGDB02517	ZNF480	-7.14767	8.85125	16.7656	37.6443	1.68715	2.60645	5.13979	2.56378	0.363178	0.667177	FALSE	FALSE
M07747	IGDB07811	ZNF808	1.15718	5.95832	2.42821	1.02779	1.97317	1.82212	4.48283	2.83752	0.224323	0.441128	FALSE	FALSE
M07842	IGDB18581	zeb1b	31.8868	2.84465	1.46319	14.1669	4.04353	2.53804	6.41145	3.67886	1.54422	1.81808	FALSE	FALSE
M07926	IGDB14932	bcl11aa	-7.61507	3.20191	1.14043	1.04864	1.42727	2.04316	5.05564	2.70059	0.238922	0.199932	FALSE	FALSE
M07926	IGDB11547	bcl11ab	-7.61507	3.20191	1.41385	1.09693	1.42727	2.04316	5.05564	2.70059	0.238922	0.199932	FALSE	FALSE
M07971	IGDB26260	pbx3b	3.26782	1.17441	1.59547	7.08238	6.20918	6.10799	9.90635	9.13491	9.38739	7.47289	FALSE	FALSE
M08015	IGDB25114	stat3	0.284462	-0.626025	42.3027	58.8617	1.23614	1.31211	4.54643	3.21494	0.97695	0.0379618	FALSE	FALSE
M08020	IGDB13492	thap1	1.8793	-0.5528	21.0857	33.6848	2.35063	2.17874	4.7708	4.46039	3.91085	2.47071	FALSE	FALSE
M08031	IGDB13298	Pou5f1	24.7785	2.16085	1175.01	19.1245	-0.294186	-1.21687	3.43985	1.3858	-0.585511	-0.36658	FALSE	FALSE
M08031	IGDB14791	Pou5f1	24.7785	2.16085	1.10672	1.7044	-0.294186	-1.21687	3.43985	1.3858	-0.585511	-0.36658	FALSE	FALSE
M08031	IGDB16024	Pou5f1	24.7785	2.16085	2.26346	4.695	-0.294186	-1.21687	3.43985	1.3858	-0.585511	-0.36658	FALSE	FALSE
M08032	IGDB14791	Pou5f1	26.933	5.24446	1.10672	1.7044	3.99835	1.82924	5.66993	2.35466	3.02457	0.697855	FALSE	FALSE
M08032	IGDB16024	Pou5f1	26.933	5.24446	2.26346	4.695	3.99835	1.82924	5.66993	2.35466	3.02457	0.697855	FALSE	FALSE
M08033	IGDB16024	Pou5f1	36.5434	5.37139	2.26346	4.695	2.98694	0.635549	5.15099	2.60185	1.72443	0.0195262	FALSE	FALSE
M08033	IGDB14791	Pou5f1	36.5434	5.37139	1.10672	1.7044	2.98694	0.635549	5.15099	2.60185	1.72443	0.0195262	FALSE	FALSE
M08035	IGDB24276	tp73	-4.82188	-2.23399	12.827	6.09884	3.78438	3.65666	5.66759	3.36435	1.42484	1.6417	FALSE	FALSE
M08052	IGDB03261	twist1	-13.476	-13.0849	14.297	33.8025	1.26906	1.48138	4.8604	2.37852	-0.440746	0.381114	FALSE	FALSE
M08052	IGDB08859	twist3	-13.476	-13.0849	1.03376	1	1.26906	1.48138	4.8604	2.37852	-0.440746	0.381114	FALSE	FALSE
M08052	IGDB01278	TWIST1	-13.476	-13.0849	1.62365	20.1202	1.26906	1.48138	4.8604	2.37852	-0.440746	0.381114	FALSE	FALSE
M08077	IGDB09004	nfe2	0.0169918	-0.150109	1.05426	1.2185	3.56178	3.22338	5.30664	3.77521	2.61064	1.10162	FALSE	FALSE
M08097	IGDB22407	Bcl6	1.61866	0.498074	5.73339	7.05103	1.49258	1.38998	4.498	2.91192	0.262784	-0.0718201	FALSE	FALSE
M08104	IGDB24348	nfyal	3.78222	0.917813	133.784	90.482	3.84814	3.31357	9.49567	7.7426	7.02889	4.7564	FALSE	FALSE
M08108	IGDB19124	tfdp1a	3.89689	0.137137	185.626	87.9072	5.27858	4.99578	8.91974	8.35718	7.51771	7.4244	FALSE	FALSE
M08118	IGDB18009	ENSORLG00000012992	6.31118	2.25435	61.5272	26.4301	1.60322	1.06848	3.75696	1.85416	-0.701838	0.263036	FALSE	FALSE
M08118	IGDB24972	foxk2	6.31118	2.25435	43.2813	22.3484	1.60322	1.06848	3.75696	1.85416	-0.701838	0.263036	FALSE	FALSE
M08119	IGDB18692	Foxh1	9.27928	2.47883	176.772	13.0567	2.54422	1.77997	4.94798	2.5527	0.0745401	0.23485	FALSE	FALSE
M08134	IGDB16131	pbx2	-5.43188	7.19929	43.8127	78.8923	3.1755	3.42469	7.00241	4.34187	2.31802	2.22999	FALSE	FALSE
M08155	IGDB18676	hnf4g	-6.57633	18.6664	6.26498	1.41945	2.40234	3.33263	5.60106	3.90446	2.41836	1.10705	FALSE	FALSE
M08163	IGDB05055	runx1	-2.745	3.22342	1.20727	1.30798	1.19508	1.48331	4.74124	2.47861	-0.0842425	0.497822	FALSE	FALSE
M08173	IGDB24381	Stat6	-1.09639	-1.62757	1.59132	4.29053	1.03245	1.0435	3.69329	2.29127	-0.19296	-0.244335	FALSE	FALSE
M08174	IGDB19213	Stat4	1.18495	-1.64011	13.0666	4.46374	1.51084	1.5321	4.90556	3.22271	1.31181	-0.0228777	FALSE	FALSE
M08184	IGDB13663	bach1a	5.53477	-4.12903	11.5089	2.32131	5.91552	4.92677	7.24996	6.55352	5.767	2.95042	FALSE	FALSE
M08238	IGDB23379	ctcf	-2.12473	-1.40786	37.3539	37.4755	6.42372	6.35644	8.64871	9.77866	9.342	6.84266	FALSE	FALSE
M08248	IGDB09723	znf653	-0.926799	-1.46591	10.0422	5.04173	-0.0499616	0.0137501	3.69034	1.71752	-1.06704	-0.557256	FALSE	FALSE
M08255	IGDB09879	ZNF519	6.75909	-0.162217	1.53298	1.80945	4.78888	4.24271	7.21284	6.79236	6.25171	3.48578	FALSE	FALSE
M08275	IGDB24754	Zfp64	3.28173	2.64283	18.8773	15.8948	5.49174	5.04185	9.25383	9.09904	7.64576	6.22458	FALSE	FALSE
M08281	IGDB02517	ZNF586	-3.78194	9.15098	16.7656	37.6443	4.04425	4.19026	6.46089	4.70227	3.0218	2.80482	FALSE	FALSE
M08283	IGDB18523	Mynn	1.23338	3.17908	38.4569	21.4596	0.251483	0.779249	3.36136	1.41128	-1.83092	-0.590529	FALSE	FALSE
M08291	IGDB02517	ZNF419	-5.05412	9.49242	16.7656	37.6443	2.61099	2.66107	5.54622	3.05955	0.549415	1.0586	FALSE	FALSE
M08300	IGDB02517	ZNF549	-2.52211	0.370265	16.7656	37.6443	2.62584	2.84711	5.55255	3.0889	0.858828	1.25346	FALSE	FALSE
M08301	IGDB18748	GTF3A	-9.29796	3.44961	137.655	8.78546	3.8918	4.26509	6.72448	3.33285	2.26619	1.99894	FALSE	FALSE
M08307	IGDB21147	fezf1	-5.50409	6.34665	1.01351	1.02597	1.17864	1.64172	4.7382	2.88018	-0.293755	0.668302	FALSE	FALSE
M08307	IGDB22999	fezf2	-5.50409	6.34665	1.30451	15.8769	1.17864	1.64172	4.7382	2.88018	-0.293755	0.668302	FALSE	FALSE
M08310	IGDB24123	Zfp341	-12.4316	7.41396	5.33073	8.28239	5.53994	5.99699	8.90886	6.97732	6.9992	5.21785	FALSE	FALSE
M08322	IGDB18291	Zfp513	-3.38413	6.82605	70.3463	26.1536	2.42742	2.30235	6.46921	1.00738	-2.33527	0.499759	FALSE	FALSE
M08322	IGDB20908	Zfp513	-3.38413	6.82605	22.2084	5.40379	2.42742	2.30235	6.46921	1.00738	-2.33527	0.499759	FALSE	FALSE
M08327	IGDB02517	ZNF610	-0.772162	-5.01325	16.7656	37.6443	5.48055	5.27634	8.58945	8.61501	8.25167	6.8836	FALSE	FALSE
M08376	IGDB02517	ZNF418	-2.38736	5.05547	16.7656	37.6443	0.974399	1.20392	4.58148	2.64516	0.388124	0.568453	FALSE	FALSE
M08388	IGDB17115	Zfp770	-6.62969	3.48033	72.671	25.2509	5.62184	5.41225	7.87783	5.9905	2.44461	4.34666	FALSE	FALSE
M08388	IGDB08885	Zfp770	-6.62969	3.48033	3.66729	3.57099	5.62184	5.41225	7.87783	5.9905	2.44461	4.34666	FALSE	FALSE
M08388	IGDB24848	Zfp770	-6.62969	3.48033	27.3054	13.4809	5.62184	5.41225	7.87783	5.9905	2.44461	4.34666	FALSE	FALSE
M08391	IGDB24742	Zbtb48	1.5388	3.60396	27.4187	20.6197	3.1195	3.07184	5.31551	3.59859	2.14886	1.13988	FALSE	FALSE
M08392	IGDB02517	ZNF134	2.38117	3.31953	16.7656	37.6443	3.13535	2.72472	5.9202	3.44037	1.64991	1.83359	FALSE	FALSE
M08734	IGDB16810	tal1	-3.42597	10.0735	1.01141	4.74372	3.17063	3.88276	5.89807	4.19167	3.40484	2.1819	FALSE	FALSE
M08734	IGDB09838	tal2	-3.42597	10.0735	1.77057	1.95532	3.17063	3.88276	5.89807	4.19167	3.40484	2.1819	FALSE	FALSE
M08743	IGDB09294	Tfe3	6.76675	-2.81834	2.51981	3.00638	4.92628	4.43714	7.05577	4.87491	5.10605	2.39918	FALSE	FALSE
M08751	IGDB18853	Myc	8.3756	-3.11687	103.598	29.5756	6.187	5.65421	8.13355	5.94651	4.41585	3.78821	FALSE	FALSE
M08751	IGDB03745	Myc	8.3756	-3.11687	34.3529	5.27103	6.187	5.65421	8.13355	5.94651	4.41585	3.78821	FALSE	FALSE
M08754	IGDB15163	MXI1	1.30817	-2.35062	3.79816	7.51024	5.39065	5.07845	7.9456	5.96178	4.6022	3.94722	FALSE	FALSE
M08754	IGDB00592	mxi1	1.30817	-2.35062	3.3109	5.06871	5.39065	5.07845	7.9456	5.96178	4.6022	3.94722	FALSE	FALSE
M08754	IGDB26356	Mxd1	1.30817	-2.35062	7.7923	4.33501	5.39065	5.07845	7.9456	5.96178	4.6022	3.94722	FALSE	FALSE
M08768	IGDB20753	Mycn	3.65152	-0.995456	93.5895	104.69	5.41733	4.78423	7.77281	4.74703	3.28818	2.30756	FALSE	FALSE
M08769	IGDB14798	HAND1	-5.12729	0.702094	1.37696	84.395	2.94292	2.87608	5.60093	3.17301	-0.16764	1.58329	FALSE	FALSE
M08772	IGDB06933	Msgn1	-5.97309	3.29364	3.50853	118.262	1.20141	1.47128	4.38524	2.51539	-0.429621	0.508711	FALSE	FALSE
M08789	IGDB19356	nfe2l2a	1.05471	-0.313913	23.1289	20.1614	3.18539	2.88803	5.14166	3.17576	1.72347	0.71436	FALSE	FALSE
M08822	IGDB22821	Ddit3	0.318713	-7.47933	6.9297	14.0307	0.513345	0.607796	3.40299	1.89388	-0.898349	-0.409014	FALSE	FALSE
M08829	IGDB06822	batf	-0.398693	-0.948906	1	1	0.903997	0.681835	3.67208	2.44868	-0.71077	-0.204826	FALSE	FALSE
M08832	IGDB06238	bach2a	1.14601	0.750869	3.57539	3.95846	3.28977	2.90992	5.69316	4.15594	3.49968	1.49843	FALSE	FALSE
M08833	IGDB11449	Atf4	1.81516	-7.42365	99.4487	423.648	1.06465	1.07067	3.62043	2.15297	-0.513872	-0.00763377	FALSE	FALSE
M08839	IGDB21555	Maf	-0.0911801	2.90905	2.17267	5.348	1.85778	2.16852	4.69986	3.04092	0.228313	0.755542	FALSE	FALSE
M08844	IGDB01327	Dbp	4.18443	-13.0121	3.3558	1.89075	1.97045	0.801857	3.09183	1.73475	-2.16681	-0.507096	FALSE	FALSE
M08844	IGDB15875	Dbp	4.18443	-13.0121	28.3658	5.21221	1.97045	0.801857	3.09183	1.73475	-2.16681	-0.507096	FALSE	FALSE
M08859	IGDB02517	ZNF586	-6.93541	5.85106	16.7656	37.6443	-1.38758	-1.0496	-0.354427	-0.851863	1.89886	-0.947789	FALSE	FALSE
M08883	IGDB02517	ZNF549	-2.1471	0.297966	16.7656	37.6443	2.25868	2.25563	5.2875	2.8145	0.592543	0.991072	FALSE	FALSE
M08948	IGDB02517	ZNF418	-2.61349	6.76715	16.7656	37.6443	1.40109	1.85021	4.57628	2.73981	0.836442	0.274484	FALSE	FALSE
M08957	IGDB02517	ZNF134	3.17527	5.00842	16.7656	37.6443	3.08864	3.06607	5.803	3.52838	0.877816	1.77786	FALSE	FALSE
M08965	IGDB14790	klf5l	-1.19745	7.10861	48.1363	6.62729	5.64688	5.33936	9.39202	7.3989	8.76995	5.90265	FALSE	FALSE
M08969	IGDB03065	ikzf1	-3.23678	7.47178	1.05921	2.64343	2.22049	2.4703	5.53078	2.76834	-0.181892	0.789445	FALSE	FALSE
M08972	IGDB22407	Bcl6	2.40696	-0.0571808	5.73339	7.05103	1.88214	1.66139	5.05034	3.09863	0.651219	0.350122	FALSE	FALSE
M08974	IGDB17115	Ovol1	4.85049	-1.78854	72.671	25.2509	1.34783	0.829194	4.08889	2.27592	-0.514733	0.179499	FALSE	FALSE
M08980	IGDB13979	Mecom	0.793079	10.4026	4.37466	3.07905	-0.880512	-0.452165	2.81639	1.71869	-0.0395002	-0.145835	FALSE	FALSE
M08986	IGDB22448	Prdm5	-1.20637	4.94821	8.19035	5.12967	4.24005	4.0279	6.75644	4.0305	2.30693	2.32127	FALSE	FALSE
M08989	IGDB14488	Hinfp	7.50728	-1.56322	42.1058	24.3039	4.94484	4.1251	7.20877	6.18584	2.99574	3.4037	FALSE	FALSE
M08995	IGDB16087	Prdm1	-8.31392	6.15559	5.37257	32.6734	1.90311	2.47409	4.41291	2.59518	-0.137967	-0.0363147	FALSE	FALSE
M08996	IGDB00286	Egr1	1.41957	8.13811	1.0636	1.03212	6.17614	5.67254	9.45241	8.16574	9.8652	6.60573	FALSE	FALSE
M08997	IGDB24279	si:ch211-263k4.2	-5.90925	11.3446	1.66345	4.35858	4.10876	4.58882	6.60124	4.00835	2.95262	2.74915	FALSE	FALSE
M08998	IGDB24357	Zfp335	-4.85668	3.27363	27.5721	14.9431	4.28738	4.57879	6.79164	4.51392	3.37825	3.36155	FALSE	FALSE
M09001	IGDB18721	Prdm14	0.0921565	6.03482	44.4	3.61538	2.25234	2.33982	5.09552	2.91047	1.18067	0.689852	FALSE	FALSE
M09009	IGDB08123	sp7	-2.98089	6.08834	1.44561	17.7039	-0.0711988	0.703279	3.13411	1.57961	-1.68644	-0.509941	FALSE	FALSE
M09010	IGDB08497	znf143b	1.71747	1.66555	41.2217	31.2582	3.57767	3.74703	6.96789	9.39862	9.11584	4.4494	FALSE	FALSE
M09014	IGDB20975	Insm1	-6.62931	10.6404	1.4296	4.54551	4.40806	4.95075	5.91663	4.92844	3.89138	2.70707	FALSE	FALSE
M09015	IGDB17787	Ctcfl	-0.300869	-2.32748	7.42536	7.20625	6.35048	6.43798	9.07592	9.93587	9.65698	7.82381	FALSE	FALSE
M09015	IGDB24919	Ctcfl	-0.300869	-2.32748	23.491	26.8606	6.35048	6.43798	9.07592	9.93587	9.65698	7.82381	FALSE	FALSE
M09015	IGDB24180	Ctcfl	-0.300869	-2.32748	58.7021	10.2265	6.35048	6.43798	9.07592	9.93587	9.65698	7.82381	FALSE	FALSE
M09038	IGDB15630	E2f3	-1.39973	-0.15946	127.767	44.3995	5.71767	5.42345	8.73537	9.5725	8.9519	8.31489	FALSE	FALSE
M09043	IGDB21118	E2f6	-5.4823	0.712214	117.942	50.8978	5.72631	5.47629	8.61044	8.47953	8.44841	7.41302	FALSE	FALSE
M09045	IGDB14278	EBF1	-3.3537	8.88603	1.36887	1.59778	3.76143	3.72089	6.99375	4.43201	2.89628	2.99464	FALSE	FALSE
M09045	IGDB12097	EBF1	-3.3537	8.88603	1.2259	3.60604	3.76143	3.72089	6.99375	4.43201	2.89628	2.99464	FALSE	FALSE
M09079	IGDB16597	Elf1	6.18193	-2.51906	21.8165	11.1525	4.13415	3.80237	7.59478	7.81607	6.77494	5.15972	FALSE	FALSE
M09102	IGDB22764	Foxj3	0.245226	-4.14106	4.78309	2.84136	-1.28152	-0.98374	2.09272	0.7669	-3.16991	-0.707146	FALSE	FALSE
M09110	IGDB19521	Foxo3	7.41922	5.69166	3.91853	3.0953	2.70649	2.35427	4.46314	3.12549	0.497314	0.721937	FALSE	FALSE
M09126	IGDB01248	grhl2b	20.0105	-0.759039	4.83526	21.8626	2.94092	1.87356	4.79022	2.98224	-0.00139104	0.615371	FALSE	FALSE
M09172	IGDB09787	Dlx3	-1.57915	12.3988	2.16378	2.53508	0.54777	1.30579	4.33141	2.02707	-1.25622	-0.0295963	FALSE	FALSE
M09180	IGDB07069	Vsx2	2.00334	11.416	1.05095	1.19061	1.45283	2.09348	4.40136	2.44956	-1.66153	0.392636	FALSE	FALSE
M09183	IGDB19857	Otx2	1.36286	16.4568	1.44551	16.9665	1.46401	2.04779	4.27101	2.25119	-0.305797	0.247409	FALSE	FALSE
M09186	IGDB14694	Cdx1	-7.6856	-5.62199	1.09304	2.10991	-1.61993	-1.13666	2.08264	1.22318	-2.0349	-0.867052	FALSE	FALSE
M09186	IGDB11968	Cdx1	-7.6856	-5.62199	1.0681	1.374	-1.61993	-1.13666	2.08264	1.22318	-2.0349	-0.867052	FALSE	FALSE
M09194	IGDB12732	Nobox	-2.11709	9.34936	33.5482	1.69794	0.522053	1.23596	3.25192	2.47608	-0.410887	-0.257629	FALSE	FALSE
M09197	IGDB11836	cdx4	-11.0518	0.922909	5.38003	246.72	-0.528548	0.575985	3.07789	1.79062	-0.848969	0.323588	FALSE	FALSE
M09209	IGDB26466	Isl1	1.01033	5.75182	1.32504	2.30932	3.11537	3.142	5.9496	3.19267	0.223085	1.04391	FALSE	FALSE
M09224	IGDB12579	Pou2f2	18.0986	-4.70485	2.18166	2.08885	2.39881	0.559606	4.00441	1.9476	0.0356156	-0.146306	FALSE	FALSE
M09224	IGDB15951	Pou2f2	18.0986	-4.70485	8.17003	2.103	2.39881	0.559606	4.00441	1.9476	0.0356156	-0.146306	FALSE	FALSE
M09225	IGDB14791	Pou5f1	32.1197	5.61428	1.10672	1.7044	3.8353	1.13851	5.84799	2.89715	3.68765	0.438039	FALSE	FALSE
M09225	IGDB16024	Pou5f1	32.1197	5.61428	2.26346	4.695	3.8353	1.13851	5.84799	2.89715	3.68765	0.438039	FALSE	FALSE
M09227	IGDB16024	Pou3f1	7.39934	-9.47804	2.26346	4.695	0.43498	-0.246903	6.99544	1.46924	-0.476631	-0.496092	FALSE	FALSE
M09227	IGDB14791	Pou3f1	7.39934	-9.47804	1.10672	1.7044	0.43498	-0.246903	6.99544	1.46924	-0.476631	-0.496092	FALSE	FALSE
M09227	IGDB13298	Pou3f1	7.39934	-9.47804	1175.01	19.1245	0.43498	-0.246903	6.99544	1.46924	-0.476631	-0.496092	FALSE	FALSE
M09241	IGDB17739	Irf3	-16.8273	6.30814	15.9982	3.24142	1.28059	2.16502	4.97034	2.40552	-2.05126	0.039789	FALSE	FALSE
M09252	IGDB01043	Mef2d	-6.64802	-9.58418	1.74111	4.73278	-0.351069	-0.0408834	2.73499	1.5093	-1.08444	-0.527236	FALSE	FALSE
M09256	IGDB13489	mbd2	2.94389	-1.56301	3.29162	3.43694	6.12976	5.28604	8.97688	9.78197	8.55087	7.52394	FALSE	FALSE
M09325	IGDB21754	Nr2f2	-15.9054	16.8023	18.6931	1.61645	2.22055	3.54522	5.51621	3.50814	0.403367	1.18759	FALSE	FALSE
M09328	IGDB07200	Nr2e3	-0.573502	9.13923	1.20535	1.07388	-0.819727	0.116242	2.86169	1.83665	-1.4917	-0.644488	FALSE	FALSE
M09338	IGDB22412	tp63	-2.86856	-4.80233	23.047	28.9813	3.97956	3.98088	5.9333	3.41085	2.2859	1.62538	FALSE	FALSE
M09352	IGDB02130	Relb	-0.740424	5.25377	33.9444	22.1817	3.4172	3.58036	6.07499	3.96399	2.15094	1.7575	FALSE	FALSE
M09353	IGDB14913	rel	-2.72059	4.77404	18.6216	5.88873	1.74211	2.19614	5.0881	2.85819	0.692406	0.645494	FALSE	FALSE
M09357	IGDB08150	Nfatc2	-5.06411	-8.90165	1	1	-0.804939	-0.784527	2.64924	1.91786	-0.911282	-0.815715	FALSE	FALSE
M09359	IGDB21641	nfatc3a	-1.92419	-8.16574	17.1373	5.21533	0.706328	0.658584	3.22164	2.31784	-0.717274	-0.258723	FALSE	FALSE
M09360	IGDB15479	NFATC1	-5.71348	-3.98491	1.05834	1.33947	0.574881	0.753056	3.92798	1.91481	-0.895372	-0.421797	FALSE	FALSE
M09360	IGDB03630	nfatc4	-5.71348	-3.98491	1.45439	4.1913	0.574881	0.753056	3.92798	1.91481	-0.895372	-0.421797	FALSE	FALSE
M09418	IGDB24381	Stat6	-0.454259	0.0981631	1.59132	4.29053	1.20137	1.31264	3.98507	2.69798	0.362987	-0.161289	FALSE	FALSE
M09421	IGDB25112	stat5a	1.66979	-0.774836	10.0915	12.5103	-0.828553	-0.491603	3.50028	1.90582	-1.38852	-0.837318	FALSE	FALSE
M09421	IGDB18061	stat5b	1.66979	-0.774836	259.387	25.0939	-0.828553	-0.491603	3.50028	1.90582	-1.38852	-0.837318	FALSE	FALSE
M09422	IGDB18168	Stat1	-13.0213	0.441858	15.3642	13.3871	-2.05371	-1.27821	3.72183	1.81391	-1.5741	-0.635606	FALSE	FALSE
M09423	IGDB22658	Stat2	-8.87319	-1.64273	59.9583	17.0689	-0.254191	0.0541052	3.83159	1.92346	-1.86255	-0.526763	FALSE	FALSE
M09424	IGDB19213	Stat4	-0.947777	-3.22801	13.0666	4.46374	1.52008	1.62703	4.66977	3.56637	0.641679	0.0434216	FALSE	FALSE
M09440	IGDB21531	thap11	1.88249	2.96628	35.5723	24.4899	3.14987	3.34732	6.23873	9.16486	9.20275	3.88328	FALSE	FALSE
M09445	IGDB20260	Nfyb	3.02681	-0.94928	83.6008	205.422	6.54983	5.6713	9.99035	9.16466	8.6698	6.94063	FALSE	FALSE
M09448	IGDB23907	Cbfb	-2.80546	3.50771	3.21988	15.3779	1.65008	1.58047	4.66285	2.57639	-0.289833	0.57579	FALSE	FALSE
M09449	IGDB12757	Nfyc	3.02793	-0.4631	182.43	90.5352	5.53151	4.94148	9.64946	8.68555	7.85694	6.30099	FALSE	FALSE
M09450	IGDB20379	Nrf1	9.48866	-8.64339	20.943	25.695	8.58183	7.53037	9.70391	11.3975	11.2338	8.57908	FALSE	FALSE
M09463	IGDB06706	myf5	-11.3278	-12.9603	1.05529	16.8232	1.96609	1.6988	5.37269	2.9408	0.465158	1.34681	FALSE	FALSE
M09466	IGDB16752	Tcf3	-12.8667	-14.0775	10.017	28.8496	2.2733	2.35294	5.69876	3.45508	1.5193	1.97827	FALSE	FALSE
M09467	IGDB18853	Myc	1.52574	-1.96341	103.598	29.5756	5.12541	4.58117	7.31155	4.8743	2.59552	2.06256	FALSE	FALSE
M09467	IGDB03745	Myc	1.52574	-1.96341	34.3529	5.27103	5.12541	4.58117	7.31155	4.8743	2.59552	2.06256	FALSE	FALSE
M09476	IGDB20753	Mycn	1.38	-1.32325	93.5895	104.69	5.14243	4.53511	7.62297	5.0281	2.72795	2.25175	FALSE	FALSE
M09492	IGDB22821	Ddit3	1.56168	-8.44077	6.9297	14.0307	0.83115	0.822951	3.63207	2.01885	-0.697994	-0.273113	FALSE	FALSE
M09496	IGDB11449	Atf4	1.54051	-7.66136	99.4487	423.648	1.1162	0.99231	3.80004	2.10167	-0.525109	0.0111062	FALSE	FALSE
M09497	IGDB22288	Mafa	-2.4366	2.50316	1.1336	1.5337	3.09608	3.1261	5.93138	3.50629	1.10832	1.3072	FALSE	FALSE
M09508	IGDB12034	znf711	-3.45417	4.73416	44.2973	21.4235	3.94013	4.27787	6.65728	3.45011	1.72447	2.49454	FALSE	FALSE
M09513	IGDB22407	Bcl6	0.662758	-0.157698	5.73339	7.05103	1.07354	0.993244	4.59116	2.80749	0.446021	-0.131758	FALSE	FALSE
M09519	IGDB08406	Rbpjl	-5.56657	-0.4389	1	1.23144	1.86611	2.42326	5.0971	3.48012	1.53123	0.738795	FALSE	FALSE
M09578	IGDB26466	Isl1	-1.40905	7.86614	1.32504	2.30932	2.40157	2.52998	5.11945	2.79734	-0.568186	0.466615	FALSE	FALSE
M09586	IGDB09266	Pax7	2.24139	3.95499	1.903	1.11991	-2.36578	-1.9179	0.565844	0.353525	-2.74805	-1.18851	FALSE	FALSE
M09587	IGDB09266	Pax7	-2.48755	4.90396	1.903	1.11991	-1.2117	-0.752675	1.90172	1.20526	-1.93963	-0.663219	FALSE	FALSE
M09588	IGDB09266	Pax7	-0.977674	4.58817	1.903	1.11991	-1.75505	-1.16703	1.71329	1.13092	-2.77984	-0.730743	FALSE	FALSE
M09589	IGDB15951	Pou2f2	17.6796	-1.02568	8.17003	2.103	0.921017	-0.276017	3.99889	2.5053	-1.13471	-0.171322	FALSE	FALSE
M09589	IGDB12579	Pou2f2	17.6796	-1.02568	2.18166	2.08885	0.921017	-0.276017	3.99889	2.5053	-1.13471	-0.171322	FALSE	FALSE
M09643	IGDB24381	Stat6	0.773022	0.278961	1.59132	4.29053	0.421712	0.355197	3.21862	2.16126	-0.995899	-0.522597	FALSE	FALSE
M09644	IGDB24381	Stat6	-1.36054	0.585796	1.59132	4.29053	0.973645	1.30019	3.7483	2.48125	-0.198681	-0.0198431	FALSE	FALSE
M09646	IGDB19213	Stat4	-0.703633	-3.5999	13.0666	4.46374	2.01014	1.83422	5.08336	3.19321	1.06987	-0.103242	FALSE	FALSE
M10805	IGDB14155	vent	-2.34995	0.146536	1.35125	1.17798	1.26976	1.758	4.50247	2.57016	0.293705	0.38222	FALSE	FALSE
M10805	IGDB02765	vox	-2.34995	0.146536	250.25	595.5	1.26976	1.758	4.50247	2.57016	0.293705	0.38222	FALSE	FALSE
M11049	IGDB02747	cdc5l	2.05696	-2.37447	203.768	151.331	-1.49706	-1.18143	1.99275	1.20947	-2.29549	-0.843533	FALSE	FALSE
M00193	IGDB02380	tcf7	4.0669	12.3932	1.72304	8.20267	NA	NA	NA	NA	NA	NA	FALSE	NA
M00391	IGDB09000	hoxc8a	0.317716	10.8123	4.88987	21.6815	NA	NA	NA	NA	NA	NA	FALSE	NA
M00458	IGDB21646	Isl2	-8.01698	10.8475	1.57868	9.29251	NA	NA	NA	NA	NA	NA	FALSE	NA
M00458	IGDB08633	Isl2	-8.01698	10.8475	1.23684	6.56857	NA	NA	NA	NA	NA	NA	FALSE	NA
M00462	IGDB16906	gbx1	-8.01698	10.8475	15.7875	23.8916	NA	NA	NA	NA	NA	NA	FALSE	NA
M00462	IGDB05196	gbx2	-8.01698	10.8475	2.0488	10.7678	NA	NA	NA	NA	NA	NA	FALSE	NA
M00477	IGDB01301	Hoxa7	0.695422	12.5472	3.7177	8.40867	NA	NA	NA	NA	NA	NA	FALSE	NA
M00519	IGDB05285	en1a	-1.96513	14.3499	4.22703	23.8288	NA	NA	NA	NA	NA	NA	FALSE	NA
