# Supplementary material for: Dynamic transcriptional and chromatin accessibility landscape of medaka embryogenesis
Source: Genome Res. 2020 Jun;30(6):924–37. doi: 10.1101/gr.258871.119 (PMC7370878; doi:10.1101/gr.258871.119)
Supplement: Supplemental Material [file supp_gr.258871.119_Supplemental_Table_S6.xlsx]

## Sheet: Sheet1
Supplemental Table S6 : Summary of organisms and samples in the NCBI GEO database which were profiled by array- or sequencing-based technologies.
https://www.ncbi.nlm.nih.gov/geo/summary/?type=taxfull
Retrieved on 2019/8/16
	Public	Unreleased	Total
Series	116728	14061	130789
Platforms	19992	234	20226
Samples	3177755	524607	3702362
Samples (Sum)	3203367
Organism	Series	Platforms	Samples	Percentage	Rank
Homo sapiens	49224	5509	1715142	0.535419	1
Mus musculus	35049	2400	785428	0.245188	2
Rattus norvegicus	3757	589	91914	0.104818	3
Drosophila melanogaster	3536	368	62007		4
Arabidopsis thaliana	3956	382	56655		5
Saccharomyces cerevisiae	2729	603	56673		6
Danio rerio	1207	201	19743		7
Sus scrofa	762	143	17463		8
Caenorhabditis elegans	1639	205	16390		9
Bos taurus	838	191	14926		10
Oryza sativa	775	194	11776	0.114575
Macaca mulatta	446	70	11532
Gallus gallus	700	142	11193
Zea mays	423	115	11293
Canis lupus familiaris	286	69	9152
synthetic construct	1004	105	8376
Escherichia coli	730	158	7388
Glycine max	274	54	7530
Schizosaccharomyces pombe	801	128	6349
Plasmodium falciparum	205	67	6358
Pimephales promelas	82	14	4895
Vitis vinifera	181	41	4423
Macaca fascicularis	107	24	4270
Triticum aestivum	189	42	3856
Ovis aries	211	48	3267
Candida albicans	280	110	3122
Pan troglodytes	113	34	3006
Oncorhynchus mykiss	193	55	2870
Parus major	1	1	3116
Escherichia coli str. K-12 substr. MG1655	237	44	2804
Staphylococcus aureus	254	97	2642
Oryza sativa Japonica Group	201	24	2738
Hordeum vulgare	110	28	2591
Solanum lycopersicum	229	56	2348
Mycobacterium tuberculosis H37Rv	128	42	2433
Mycobacterium tuberculosis	199	81	2294
Xenopus laevis	201	36	2223
Pseudomonas aeruginosa	237	28	2050
Ambystoma mexicanum	26	9	2274
Streptococcus pyogenes	105	60	2047
Halobacterium salinarum NRC-1	96	22	2016
Bacillus subtilis	149	53	1911
Salmonella enterica subsp. enterica serovar Typhimurium	122	39	1949
Bacteria	84	59	1904
Medicago truncatula	158	39	1843
Solanum tuberosum	116	23	1860
Salmo salar	143	29	1812
Schmidtea mediterranea	64	20	1828
Ciona robusta	9	3	1900
Equus caballus	91	38	1695
Gossypium hirsutum	132	35	1383
Oryza sativa Indica Group	83	9	1446
Apis mellifera	81	30	1414
Xenopus tropicalis	74	35	1369
Daphnia magna	54	27	1395
Helicobacter pylori	41	27	1345
Taeniopygia guttata	47	15	1323
Cricetulus griseus	33	15	1223
Cryptomeria japonica	8	9	1243
Schistosoma mansoni	48	20	1150
Neurospora crassa	78	18	1086
Plasmodium falciparum NF54	3	2	1162
Streptococcus pneumoniae	80	51	1025
Campylobacter jejuni	86	59	980
Human gammaherpesvirus 4	268	72	768
Fundulus heteroclitus	33	15	1056
Nicotiana tabacum	71	23	990
Dictyostelium discoideum	49	15	1011
Chlamydomonas reinhardtii	71	29	962
Populus trichocarpa	80	38	937
Viruses	51	43	943
Malus domestica	40	22	963
Cryptococcus neoformans	50	13	958
Escherichia coli K-12	184	29	803
human oral metagenome	3	1	970
Oryctolagus cuniculus	71	27	866
[Candida] glabrata	57	28	868
human gut metagenome	16	8	921
Salmonella enterica subsp. enterica serovar Typhimurium str. SL1344	83	25	825
Populus trichocarpa x Populus deltoides	32	13	861
Vibrio cholerae	63	26	816
Drosophila mojavensis	21	9	874
Streptomyces coelicolor	58	19	822
Synechocystis sp. PCC 6803	73	28	787
Brassica napus	76	30	746
Papio anubis	10	5	818
Aedes aegypti	61	29	737
Bacillus cereus	20	5	797
Crassostrea gigas	23	10	777
Toxoplasma gondii	61	24	724
Bacillus subtilis subsp. subtilis str. 168	97	42	654
Brassica rapa	40	15	727
Listeria monocytogenes	67	52	644
Bacteroides thetaiotaomicron VPI-5482	19	13	722
Synechococcus elongatus PCC 7942	33	7	709
Saccharomyces cerevisiae BY4741	33	10	706
Sorghum bicolor	29	20	687
Anopheles gambiae	55	24	647
Marmota monax	11	3	709
Daphnia pulex	28	10	674
Solenopsis invicta	14	7	690
Aspergillus nidulans	72	26	608
Aspergillus niger	60	14	611
Chlorocebus sabaeus	17	4	663
Marvinbryantia formatexigens DSM 14469	5	8	665
Thermus thermophilus HB8	76	2	594
Drosophila simulans	77	13	581
Neisseria meningitidis	21	11	633
Pseudomonas aeruginosa PAO1	83	20	561
Oncorhynchus nerka	26	4	623
Bacteroides ovatus ATCC 8483	8	7	631
Bacteroides caccae ATCC 43185	8	7	631
Collinsella aerofaciens ATCC 25986	8	7	631
Trypanosoma brucei brucei	21	9	614
[Eubacterium] rectale ATCC 33656	8	7	617
[Clostridium] symbiosum	4	6	617
Picea glauca	15	6	603
Populus tremula x Populus alba	63	13	544
Human gammaherpesvirus 8	276	71	271
Chlorocebus aethiops	36	7	561
Desulfovibrio piger GOR1	4	4	590
Strongylocentrotus purpuratus	25	40	530
Citrus sinensis	63	13	514
Bombyx mori	56	22	506
Capra hircus	60	15	508
Helianthus annuus	16	4	560
Ciona intestinalis	47	15	514
Yersinia pestis	53	25	497
Streptococcus mutans UA159	44	17	502
Bacillus anthracis str. Sterne	5	2	556
Eisenia fetida	12	11	538
Sparus aurata	25	13	521
Sinorhizobium meliloti	108	12	436
Caulobacter vibrioides	42	16	490
Crassostrea virginica	3	1	540
soil metagenome	12	4	526
Tursiops truncatus	10	6	526
Mustela putorius furo	20	7	506
Saccharomyces bayanus	25	23	484
Mytilus galloprovincialis	27	10	494
uncultured bacterium	25	8	492
Blautia hydrogenotrophica DSM 10507	2	2	515
Nematostella vectensis	15	7	485
Tetrahymena thermophila	48	10	447
Trichoderma reesei	42	22	435
Folsomia candida	19	6	473
Burkholderia pseudomallei K96243	10	7	469
Simian-Human immunodeficiency virus	2	2	470
Meleagris gallopavo	26	4	443
Human betaherpesvirus 5	248	67	152
Burkholderia cenocepacia	8	6	449
Anguilla anguilla	16	9	433
Gadus morhua	15	9	433
Lactobacillus plantarum	43	10	404
Cavia porcellus	14	10	431
Human immunodeficiency virus 1	271	67	117
Nicotiana attenuata	23	6	424
Nothobranchius furzeri	11	3	437
Oryzias latipes	34	26	389	0.000122413
Aspergillus fumigatus	46	20	380
Streptococcus mutans	46	13	384
Phaseolus vulgaris	18	11	409
Bacteroides thetaiotaomicron	39	8	390
Drosophila pseudoobscura	46	17	374
Halobacterium salinarum	9	0	424
Tribolium castaneum	19	13	390
Clostridioides difficile	49	13	356
Histoplasma capsulatum	17	100	296
Drosophila virilis	36	17	355
Lepeophtheirus salmonis	9	1	389
Shewanella oneidensis MR-1	30	15	354
Cucumis sativus	21	10	368
Nicotiana benthamiana	38	15	341
Lactococcus lactis	42	20	331
Drosophila serrata	4	2	387
Urocitellus parryii	7	4	381
Melitaea cinxia	3	3	384
Phaeodactylum tricornutum	24	14	350
Streptococcus pneumoniae D39	101	10	274
Fusarium graminearum	32	17	335
Haemophilus influenzae	31	30	319
Ustilago maydis	39	12	329
Solanum lycopersicum x Solanum pennellii	8	4	365
Human alphaherpesvirus 1	261	67	46
Gasterosteus aculeatus	17	7	346
Cryptococcus neoformans var. grubii H99	37	14	316
Desulfovibrio vulgaris str. Hildenborough	42	14	311
Coregonus clupeaformis	39	3	321
Escherichia coli BW25113	22	10	331
Ruditapes philippinarum	12	7	343
Streptococcus pneumoniae TIGR4	12	11	336
Salmonella enterica	91	27	240
Pseudotsuga menziesii	9	2	346
Actinobacillus pleuropneumoniae	23	6	326
Campylobacter jejuni subsp. jejuni NCTC 11168 = ATCC 700819	45	24	286
Trypanosoma brucei	30	17	308
Drosophila yakuba	46	12	287
Bos indicus	23	5	316
Plasmodium berghei	31	17	295
Haplochromis burtoni	11	3	326
Micropterus salmoides	19	7	314
Pseudomonas putida KT2440	40	19	279
Macaca mulatta polyomavirus 1	265	65	7
mouse gut metagenome	14	6	317
Brachypodium distachyon	23	11	301
Heterocephalus glaber	12	5	314
Human polyomavirus 1	248	54	20
Bradyrhizobium japonicum	41	1	279
Plasmodium falciparum 3D7	35	11	273
Pyricularia oryzae	32	6	280
Clostridium botulinum	11	8	297
Blumeria graminis f. sp. hordei	8	3	303
unidentified	35	4	275
Methanococcus maripaludis S2	19	4	290
Cicer arietinum	31	15	264
Scophthalmus maximus	11	7	291
Porphyromonas gingivalis	32	22	254
Clostridium acetobutylicum	19	7	278
Phytophthora sojae	10	5	289
JC polyomavirus	248	55	0
Euphorbia esula	14	4	285
Acropora millepora	12	6	284
Mycoplasma pneumoniae M129	3	2	295
Archaea	45	29	223
Acinetobacter baumannii	33	19	243
Xylella fastidiosa	16	8	270
marine metagenome	10	4	279
Pseudomonas putida	38	13	241
Enchytraeus albidus	9	4	274
Biomphalaria glabrata	11	4	270
Dictyostelium discoideum AX4	1	2	282
Clostridium perfringens	12	7	266
Petrolisthes cinctipes	3	3	278
Solanum pimpinellifolium	15	7	262
Mycolicibacterium smegmatis	36	22	224
Bacillus anthracis	16	26	239
Spodoptera frugiperda	19	11	250
Oncorhynchus tshawytscha	42	5	231
Cucumis melo	11	7	260
Picea abies	13	2	260
Bacillus cereus ATCC 14579	29	15	231
Mus musculus domesticus	18	7	249
Schistosoma japonicum	23	12	238
Drosophila ananassae	17	7	248
Plasmodium knowlesi	7	4	259
Entamoeba histolytica	27	9	233
Aspergillus flavus	23	15	229
Rhodopseudomonas palustris	13	8	245
Enterococcus faecalis	31	20	215
Dicentrarchus labrax	17	7	242
Triticum turgidum subsp. durum	14	4	246
Amphimedon queenslandica	8	6	250
Streptococcus sp. 'group A'	8	2	253
Rhodobacter sphaeroides	25	3	232
Saccharomyces cerevisiae SK1	12	2	245
Oncorhynchus gorbuscha	7	1	250
Nasonia vitripennis	20	8	229
Listeria monocytogenes EGD-e	25	14	218
Manihot esculenta	35	13	208
Rhodobacter sphaeroides 2.4.1	56	11	189
Eucalyptus grandis	12	11	232
Yarrowia lipolytica	17	11	226
Ipomoea batatas	11	10	233
Saccharomyces paradoxus	26	15	212
Petunia x hybrida	21	7	220
Capsicum annuum	24	10	213
Trichophyton rubrum	15	13	218
Murid gammaherpesvirus 4	196	38	12
Salmo trutta	6	2	237
Perca flavescens	2	1	240
Physcomitrella patens	32	25	184
Caulobacter vibrioides NA1000	31	12	197
Staphylococcus epidermidis	21	13	205
Neisseria gonorrhoeae	21	24	193
Monodelphis domestica	26	9	203
Picea engelmannii x Picea glauca	6	0	231
Saccharomyces cerevisiae W303	15	4	217
Salvelinus fontinalis	3	0	232
Vitis riparia	9	7	218
Enchytraeus crypticus	8	2	224
Pseudomonas syringae pv. tomato str. DC3000	9	7	216
Macaca nemestrina	19	9	204
Sus scrofa domesticus	29	9	193
Caenorhabditis remanei	10	4	216
Hungateiclostridium thermocellum ATCC 27405	14	10	206
Clostridium acetobutylicum ATCC 824	18	7	204
Tetranychus urticae	22	7	200
Blastocladiella emersonii	4	2	221
Hydra vulgaris	8	6	212
Oncorhynchus kisutch	6	1	219
Cyprinus carpio	30	9	187
Cryptococcus neoformans var. grubii	16	6	203
Francisella tularensis	14	18	192
Streptococcus suis	11	8	203
Pisum sativum	11	9	201
Myxococcus xanthus	11	6	204
Kluyveromyces lactis	23	13	184
Mycolicibacterium smegmatis MC2 155	31	28	160
Onthophagus taurus	4	3	211
Streptococcus agalactiae	21	18	179
Candida parapsilosis	26	12	180
Populus x canadensis	15	3	197
Bradyrhizobium diazoefficiens USDA 110	39	2	174
Mus	20	6	188
Escherichia coli B str. REL606	3	1	209
Eohaustorius estuarius	13	3	197
Mus musculus musculus x M. m. domesticus	3	0	208
Dinoroseobacter shibae DFL 12 = DSM 16493	19	3	189
Ascaris suum	8	5	198
Harpegnathos saltator	15	3	192
Colinus virginianus	10	2	198
Escherichia coli O157:H7	21	7	181
Vibrio parahaemolyticus	15	13	181
Pinus taeda	19	20	170
Prunus persica	20	15	174
Populus deltoides	14	2	192
Drosophila grimshawi	3	3	202
Eucalyptus grandis x Eucalyptus urophylla	4	0	204
Escherichia coli O157:H7 str. Sakai	51	8	148
Etheostoma caeruleum	4	2	201
Orbicella faveolata	16	7	183
Paralichthys olivaceus	13	7	185
Bacillus subtilis PY79	8	4	193
Pseudomonas syringae	3	2	199
Corynebacterium glutamicum	51	17	134
Brassica oleracea	22	11	168
Prochlorococcus marinus subsp. pastoris str. CCMP1986	9	8	183
Francisella tularensis subsp. novicida	4	3	193
Gillichthys mirabilis	7	3	189
Fusarium fujikuroi	18	9	170
Sesamum indicum	1	1	195
Neurospora crassa OR74A	15	5	177
Murid betaherpesvirus 1	160	31	4
Salmonella enterica subsp. enterica serovar Typhimurium str. 14028S	28	11	156
human blood metagenome	1	1	192
Mycobacterium tuberculosis CDC1551	17	9	167
Penaeus monodon	10	8	175
Anas platyrhynchos	23	8	161
Podospora anserina	7	4	180
Setaria viridis	7	3	180
Drosophila sechellia x Drosophila simulans	9	1	180
Brugia malayi	16	7	167
Burkholderia pseudomallei	11	8	171
Gossypium barbadense	35	5	148
Burkholderia thailandensis E264	3	3	182
Olea europaea	11	8	168
Oreochromis niloticus	12	10	165
Prochlorococcus marinus str. NATL2A	5	3	176
Escherichia coli O157:H7 str. EDL933	61	12	110
Hypsibius dujardini	4	3	176
Coprinopsis cinerea	17	10	154
Salmonella enterica subsp. enterica serovar Typhimurium str. ST4/74	7	2	172
Anolis carolinensis	12	7	161
Lactobacillus reuteri	20	5	155
Boehmeria nivea	9	4	167
Theobroma cacao	11	6	162
Salmonella enterica subsp. enterica serovar Typhimurium str. LT2	49	32	98
Homarus americanus	5	4	170
Salmonella enterica subsp. enterica serovar Typhi	16	2	159
Serinus canaria	4	0	173
Chromochloris zofingiensis	7	3	167
Heliconius erato petiverana	6	2	169
Camponotus floridanus	13	4	160
Pinus sylvestris	10	5	161
Hepatitis B virus	2	2	171
Glycine soja	7	4	163
Hungateiclostridium thermocellum DSM 1313	9	2	162
Lactococcus lactis subsp. cremoris MG1363	19	9	144
Oikopleura dioica	7	6	159
Medicago sativa	73	8	91
Aggregatibacter actinomycetemcomitans	9	9	153
Zea mays subsp. mays	21	4	146
Andropogon gerardi	3	0	168
Branchiostoma lanceolatum	7	6	158
Leishmania donovani	18	9	143
Saccharomyces cerevisiae S288C	34	12	124
Panicum virgatum	8	7	154
Staphylococcus aureus subsp. aureus USA300	26	5	137
Thalassiosira pseudonana	10	7	151
Solanum chacoense	2	1	164
Klebsiella pneumoniae	20	18	129
Drosophila sechellia	31	9	127
Trypanosoma cruzi	24	18	124
Cupriavidus metallidurans CH34	16	2	148
Mus musculus x Mus spretus	17	5	144
Human alphaherpesvirus 2	123	41	1
Mnemiopsis leidyi	7	3	155
Plasmodium cynomolgi strain B	6	2	157
Hypomesus transpacificus	6	2	157
Helicoverpa armigera	9	4	152
Pinus pinaster	10	8	146
Acropora palmata	8	10	146
Fagus sylvatica	10	3	151
Callithrix jacchus	13	8	143
Nostoc punctiforme PCC 73102	4	3	155
Penaeus vannamei	6	6	150
Yersinia enterocolitica	8	4	149
Mytilus californianus	6	5	150
Papio hamadryas	13	4	144
Phanerochaete chrysosporium	16	6	139
Zymomonas mobilis subsp. mobilis ZM4 = ATCC 31821	11	10	139
Fusarium verticillioides	15	10	135
Shewanella piezotolerans WP3	28	2	130
Lactobacillus plantarum WCFS1	32	7	120
Ictidomys tridecemlineatus	7	6	146
Drosophila willistoni	8	4	147
Rattus rattus	14	6	138
Chlamydia trachomatis	29	6	123
Coxiella burnetii	40	5	112
Bifidobacterium breve UCC2003	26	5	126
Coturnix japonica	14	3	140
Legionella pneumophila subsp. pneumophila str. Philadelphia 1	14	4	138
Dehalococcoides mccartyi 195	14	6	135
Chelon labrosus	3	4	148
Streptomyces coelicolor A3(2)	28	13	114
Corynebacterium glutamicum ATCC 13032	36	10	108
Merkel cell polyomavirus	117	37	0
Salmonella enterica subsp. enterica serovar Enteritidis	24	6	123
Ampelisca abdita	1	1	151
Mycobacterium avium	6	3	144
Penicillium chrysogenum	15	6	132
Cercocebus atys	7	1	144
Venezuelan equine encephalitis virus	2	2	148
Bordetella pertussis	7	4	141
Plasmodium yoelii	10	7	134
Eukaryota	17	15	119
Clostridioides difficile 630	17	13	120
Lachancea kluyveri	8	5	137
Phytophthora infestans	16	8	126
Coffea arabica	5	2	141
Campylobacter coli	3	3	141
Drosophila persimilis	6	4	137
Aplysia californica	15	10	121
mixed sample	9	4	133
Enterococcus faecalis OG1RF	11	3	132
Solea solea	3	2	141
Notamacropus eugenii	8	6	132
Candidatus Pelagibacter ubique HTCC1062	9	2	134
Chironomus riparius	2	4	139
Zonotrichia leucophrys gambelii	3	0	142
Naumovozyma castellii	15	7	122
Mesocricetus auratus	15	6	123
Lates calcarifer	5	3	135
Populus nigra	8	1	134
Saccharum hybrid cultivar SP80-3280	6	0	136
Aegilops tauschii	8	3	131
Ruditapes decussatus	7	4	130
Wyeomyia smithii	3	2	136
uncultured soil microorganism	6	5	129
Shigella flexneri	14	7	119
Synechococcus sp. WH 8102	9	5	126
Geobacter sulfurreducens	19	5	116
Cyanidioschyzon merolae	4	4	132
Drosophila melanogaster x Drosophila simulans	2	3	135
Escherichia coli CFT073	54	11	74
Populus balsamifera	4	1	134
Arabidopsis	15	2	122
Rhipicephalus microplus	10	6	122
Candida dubliniensis	11	7	120
Oxytricha trifallax	8	4	126
Arabidopsis lyrata	27	9	102
Botrytis cinerea	19	11	108
Salamandra salamandra	7	2	127
Sturnus vulgaris	3	0	132
Helicobacter pylori 26695	14	10	111
Schmidtea polychroa	2	1	132
Rickettsia rickettsii	21	2	111
Eulimnogammarus cyaneus	3	1	130
Solanum melongena	11	3	119
Rhodococcus jostii RHA1	20	5	108
Dictyostelium discoideum AX2	2	3	128
Canis lupus	11	2	120
Arachis hypogaea	13	10	109
Dunaliella viridis	2	2	127
Sinorhizobium meliloti 1021	14	4	112
Prunus domestica	2	1	127
Heliconius erato etylus x Heliconius himera	2	0	126
Eulimnogammarus verrucosus	3	1	124
Populus tomentosa	11	3	114
Plasmodium vivax	13	10	104
Vitis hybrid cultivar	2	0	125
Felis catus	12	8	107
Musculus	1	0	126
Salmonella enterica subsp. enterica	8	7	111
Bifidobacterium longum	34	7	85
Saccharum hybrid cultivar (mixed)	7	1	118
Saccharomyces cerevisiae Sigma1278b	3	2	120
Sceloporus occidentalis	4	1	120
Populus tremula x Populus tremuloides	11	2	112
Brucella melitensis bv. 1 str. 16M	14	4	107
Escherichia coli str. K-12 substr. MDS42	1	0	124
Eutrema salsugineum	10	6	109
Fragaria x ananassa	11	8	106
Linum usitatissimum	8	7	110
mouse metagenome	2	1	122
Mytilus edulis	5	4	115
Gammarus lacustris	3	1	120
Caenorhabditis briggsae	16	10	97
Streptococcus thermophilus	20	8	95
seawater metagenome	3	2	116
Persea americana	8	5	108
Moraxella catarrhalis BBH18	6	4	111
Yersinia pseudotuberculosis	18	3	100
Littorina saxatilis	3	2	115
Zymomonas mobilis	5	4	110
Sclerotinia sclerotiorum	8	6	105
Aspergillus oryzae	26	6	84
Rana catesbeiana	10	4	102
Karenia brevis	6	2	108
Culex quinquefasciatus	14	9	92
Shewanella oneidensis	9	5	101
Citrus reticulata	15	5	94
Gorilla gorilla	19	13	82
Carassius auratus	21	3	90
Steinernema carpocapsae	5	3	106
Bos indicus x Bos taurus	5	4	105
human metagenome	4	6	104
Elaeis guineensis	2	2	110
Staphylococcus aureus subsp. aureus NCTC 8325	29	10	74
Haloferax volcanii	7	4	102
Junonia coenia	6	3	104
Ursus americanus	5	4	104
Lactobacillus helveticus	13	4	96
Jatropha curcas	8	6	98
Paramecium tetraurelia	13	5	93
Lactuca sativa	9	6	95
Leishmania major	22	9	79
Cryptococcus neoformans var. neoformans	19	3	87
Picea sitchensis	14	2	93
Saccharomyces mikatae	14	7	88
Musca domestica	7	4	97
Saccharum officinarum	28	15	65
Trichoderma atroviride	8	7	93
Methanococcus maripaludis	4	2	102
Lepidium sativum	1	0	107
[Haemophilus] ducreyi	8	3	96
Methylorubrum extorquens AM1	9	6	92
Coryphaena hippurus	4	2	101
Desulfovibrio alaskensis G20	10	5	92
Saccharopolyspora erythraea	8	6	92
Komagataella pastoris	7	7	92
Clavispora lusitaniae	11	3	91
Bombus terrestris	6	5	94
Allium sativum	1	1	102
Acyrthosiphon pisum	9	8	87
Legionella pneumophila	9	3	92
Eucommia ulmoides	1	1	102
Enterococcus faecium	15	8	81
Thermosynechococcus elongatus BP-1	5	4	95
Papio cynocephalus	3	2	98
Dreissena polymorpha	6	2	95
Penicillium oxalicum	9	6	88
Populus euphratica	22	13	67
Streptococcus sanguinis	9	5	87
Paramecium bursaria Chlorella virus 1	1	2	98
Camellia sinensis	13	8	80
Borreliella burgdorferi	26	8	67
Geranium dissectum	1	0	100
Bubalus bubalis	11	6	83
Platynereis dumerilii	2	1	97
Enterobacteria phage T7	3	2	95
Aspergillus parasiticus	8	0	92
Cervus elaphus	6	0	93
Bifidobacterium breve	4	1	94
Burkholderia thailandensis	5	3	91
Sorghastrum nutans	1	0	98
Symbiodinium sp. C1	2	1	96
Paracoccidioides brasiliensis	5	2	92
Nannochloropsis oceanica	6	5	87
Corynebacterium glutamicum R	20	3	75
Brassica juncea	12	4	82
Populus sp.	84	2	12
Callospermophilus lateralis	6	3	89
Solanum dulcamara	7	2	88
Ictalurus punctatus	10	7	80
activated sludge metagenome	4	0	93
Human mastadenovirus A	1	0	96
Sphingomonas wittichii RW1	6	2	89
Postia placenta	10	5	82
Lactobacillus acidophilus	15	3	79
Lactobacillus gasseri	10	2	84
Saccharomyces cerevisiae x Saccharomyces paradoxus	10	4	82
Mycoplasma hyopneumoniae	5	3	88
Nitrosomonas europaea	14	6	75
Schizophyllum commune	12	6	77
Mycobacterium tuberculosis variant bovis BCG	12	5	78
Geobacter sulfurreducens PCA	13	5	76
Citrullus lanatus	9	7	78
Bemisia tabaci	12	6	76
Streptococcus uberis	4	3	87
Streptomyces clavuligerus	9	4	81
Haemophilus influenzae R2866	7	1	86
Synechococcus sp. PCC 7002	7	4	82
Bacteroides cellulosilyticus	2	1	90
rat gut metagenome	3	3	86
Apostichopus japonicus	15	5	72
Alteromonas macleodii	3	2	87
Lactobacillus johnsonii	11	4	76
Thermoanaerobacter sp. X514	4	2	85
Pseudomonas fluorescens	16	4	71
Petromyzon marinus	8	7	76
Colletotrichum higginsianum IMI 349063	4	1	86
Influenza A virus	5	5	81
Pleurotus ostreatus	7	6	77
Aspergillus terreus	3	2	85
Synechococcus sp. WH 7803	4	3	83
Sciaenops ocellatus	4	2	84
Pan paniscus	18	13	58
Chlamydia pneumoniae	5	15	69
Secale cereale x Triticum turgidum subsp. durum	2	0	87
Toxoplasma gondii RH	7	4	78
Pinctada maxima	4	1	84
Citrus trifoliata	14	7	67
Brassica rapa subsp. pekinensis	13	3	72
Pasteurella multocida	3	1	84
Vibrio parahaemolyticus RIMD 2210633	14	7	67
Lactobacillus casei	13	6	69
Dinoroseobacter shibae	4	2	81
Pongo pygmaeus	15	21	51
Lactococcus lactis subsp. lactis	8	4	75
Armigeres subalbatus	1	1	84
Escherichia coli str. K-12 substr. W3110	8	3	75
Picea mariana	4	0	82
Lachancea waltii	7	3	76
Fusarium graminearum PH-1	5	2	79
Danaus plexippus	4	2	79
Fusarium oxysporum	10	8	67
Mycoplasma gallisepticum	4	3	78
Methanosarcina barkeri str. Fusaro	2	1	81
Staphylococcus aureus subsp. aureus str. Newman	10	3	71
Clostridium beijerinckii	6	3	75
Oncopeltus fasciatus	2	2	80
Thalassiosira pseudonana CCMP1335	9	7	68
Enterococcus faecalis V583	21	9	53
Vigna unguiculata	8	6	69
Paxillus involutus	9	1	73
Steinernema feltiae	3	1	79
Lactobacillus rhamnosus GG	4	3	76
Deinococcus radiodurans	10	5	67
Oenococcus oeni	12	3	67
Microcebus murinus	5	0	77
other sequences	10	3	69
Zonotrichia albicollis	2	2	78
Pinus radiata	6	1	75
Schizosaccharomyces pombe 972h-	10	3	69
Laccaria bicolor	14	7	60
Dendroctonus ponderosae	2	3	76
Agaricus bisporus	6	6	69
Mus spretus	16	4	60
Mycobacterium tuberculosis H37Ra	4	5	71
Deinococcus radiodurans R1	10	3	66
Vibrio harveyi	11	3	65
Lotus japonicus	9	11	59
Anopheles coluzzii	6	3	70
Pseudomonas aeruginosa PA14	12	6	60
Pongo abelii	12	6	60
Papaver somniferum	9	5	64
Bifidobacterium adolescentis	9	2	67
Granulibacter bethesdensis	18	1	59
Cyprinodon variegatus	2	2	74
Rhodopirellula baltica	5	0	72
Paracoccidioides lutzii Pb01	1	0	76
Mycobacterium tuberculosis variant bovis	13	7	57
Brucella melitensis	15	9	52
Thymus	2	0	74
Citrobacter rodentium	7	4	65
Lactobacillus brevis	12	7	57
Citrus maxima	9	4	63
Methanobrevibacter smithii	13	2	60
Blattella germanica	8	5	62
Zika virus	5	3	67
Pyrococcus furiosus	7	5	63
Lactococcus lactis subsp. cremoris	8	4	63
Locusta migratoria	8	7	60
Beauveria bassiana	8	4	62
Alligator mississippiensis	5	3	66
Pseudomonas aeruginosa UCBPP-PA14	8	4	62
Zalophus californianus	1	0	73
Phyllostachys edulis	6	3	65
Plasmodium coatneyi	3	1	70
Saccharomyces cerevisiae x Saccharomyces uvarum	4	2	68
Tropheryma whipplei	3	1	69
Crocosphaera subtropica ATCC 51142	2	2	69
Drosophila montana	5	3	65
Thermotoga maritima MSB8	7	5	61
Alphavirus	1	0	72
Rhodobacter capsulatus	8	3	62
Helicobacter pylori J99	4	4	65
Nitrosomonas europaea ATCC 19718	7	2	63
Phalaenopsis aphrodite	4	2	66
Solea senegalensis	13	4	55
Gossypium arboreum	35	7	30
Gossypium raimondii	31	5	36
Arabidopsis lyrata subsp. lyrata	8	1	63
synthetic gene	3	1	68
Moraxella catarrhalis	11	3	57
Escherichia virus T4	3	2	66
Caulobacter vibrioides CB15	11	5	54
uncultured prokaryote	2	0	68
Ornithorhynchus anatinus	9	10	51
Streptococcus pneumoniae R6	14	8	48
Methanosarcina acetivorans	2	1	67
Candida tropicalis	8	3	59
Drosophila miranda	4	2	64
Pomacentrus moluccensis	2	0	67
Shewanella baltica	3	2	64
Xanthomonas oryzae pv. oryzae PXO99A	3	0	66
Arabidopsis halleri	6	2	61
Austrofundulus limnaeus	2	1	65
Lactobacillus rhamnosus	10	3	55
Fundulus grandis	2	1	65
Saccharomyces kudriavzevii	10	3	55
Komagataella phaffii CBS 7435	2	0	66
Teleopsis dalmanni	5	5	58
Solanum pennellii	7	7	54
Melita plumulosa	2	1	65
Plasmodium berghei ANKA	13	6	49
Saccharomyces pastorianus	6	0	62
Aspergillus oryzae RIB40	8	6	54
Pinus contorta	2	0	65
Xanthomonas oryzae pv. oryzae KACC 10331	7	4	56
Myzus persicae	8	3	56
Boechera stricta	3	2	61
Ogataea angusta	7	6	53
Pyricularia grisea	20	10	36
Hippoglossus hippoglossus	4	2	60
Meloidogyne incognita	4	6	56
Oreochromis mossambicus	3	2	61
Drosophila mauritiana	13	4	49
Antirrhinum majus	5	3	58
Streptomyces turgidiscabies	3	4	59
Streptomyces tsukubensis NRRL18488	2	2	62
Synechococcus sp. WH 8109	3	2	60
Melospiza melodia	3	0	62
Lactococcus lactis subsp. lactis Il1403	7	5	53
Fucus vesiculosus	2	1	62
Arabis alpina	6	4	55
sediment metagenome	1	0	64
Talinum fruticosum	2	2	60
Pristionchus pacificus	13	5	46
Rhinella marina	2	2	60
Caenorhabditis brenneri	5	3	56
Trichodesmium erythraeum IMS101	5	4	55
Drosophila erecta	11	4	49
Mycobacterium marinum	5	3	56
Mus musculus musculus x M. m. castaneus	6	3	55
Bruguiera gymnorhiza	3	3	58
Leishmania infantum	13	4	47
Columba livia	5	2	56
Triticum monococcum	2	1	60
Clostridium beijerinckii NCIMB 8052	7	3	53
Methanocaldococcus jannaschii	6	5	52
Vibrio vulnificus	7	9	47
Cynoglossus semilaevis	6	3	54
Populus maximowiczii x Populus nigra	3	0	60
Mus musculus cytomegalovirus 2	59	4	0
Allium cepa	2	1	60
Gossypium herbaceum	3	0	60
Bacteroides vulgatus	13	1	49
Ginkgo biloba	13	5	45
Hevea brasiliensis	9	2	52
Porphyromonas gingivalis W83	14	9	40
Haloferax mediterranei	7	5	50
Mytilus trossulus	2	0	60
Saccharolobus solfataricus	5	4	53
Cupriavidus metallidurans	4	0	58
Bacillus subtilis subsp. subtilis	1	0	61
Agrobacterium tumefaciens	10	4	47
Ostreococcus tauri	2	2	57
Laccaria bicolor S238N-H82	6	2	53
Lactobacillus paracasei	10	5	46
Cutibacterium acnes	2	0	59
Xiphophorus maculatus	2	1	58
Heterobasidion annosum	5	2	54
Streptococcus gordonii	9	6	46
Neurospora discreta	3	2	56
Penaeus japonicus	3	1	57
Mycobacterium avium subsp. paratuberculosis	12	3	45
Populus tremuloides	8	4	48
Arcobacter butzleri RM4018	2	1	57
Aspergillus nidulans FGSC A4	16	8	36
Bacillus sp. N16-5	2	1	57
Ips pini	2	2	56
Leptosphaeria maculans	5	6	49
Populus tremula	4	2	54
Cardiocondyla obscurior	1	0	58
Aspergillus fumigatus Af293	16	10	33
Citrus limon	7	1	51
Proteus mirabilis	10	6	43
Vulpes vulpes	2	1	56
Dehalococcoides mccartyi	3	1	54
riverine metagenome	1	1	56
Limnospira indica PCC 8005	3	1	54
Beta vulgaris	6	6	45
Salmonella enterica subsp. enterica serovar Paratyphi A	3	0	54
Lactobacillus fermentum	9	3	45
Vibrio cholerae O1 biovar El Tor str. N16961	9	4	44
Propionibacterium freudenreichii subsp. shermanii	2	0	55
Rousettus aegyptiacus	2	1	54
Osmerus mordax	39	3	15
Staphylococcus aureus subsp. aureus MSSA476	12	2	43
Trametes coccinea	5	3	49
Mycobacterium tuberculosis variant bovis BCG str. Pasteur 1173P2	6	2	48
Streptococcus pyogenes NZ131	8	6	42
Ulmus minor	1	1	54
Musa acuminata AAA Group	5	4	47
Helicoverpa zea	5	4	47
Debaryomyces hansenii	9	7	40
Campylobacter jejuni subsp. jejuni 81-176	7	5	44
Listeria monocytogenes serotype 4b str. F2365	5	4	46
Rhizopus delemar	2	1	52
Canis rufus	2	0	53
Carica papaya	7	5	43
Ceratitis capitata	7	3	45
Trichoderma virens	8	6	41
Acipenser sinensis	2	2	51
Pseudomonas protegens	7	3	45
Oncorhynchus keta	2	1	52
Lynx rufus	1	2	52
Oryza rufipogon	10	4	40
Fusobacterium nucleatum	5	7	42
Bifidobacterium animalis subsp. lactis CNCM I-2494	1	3	50
Ruegeria pomeroyi DSS-3	6	4	44
Shigella boydii	2	0	52
Rattus	3	1	50
Erwinia amylovora	4	3	46
Caldicellulosiruptor bescii	4	2	47
Citrus x paradisi	7	2	44
Pseudomonas syringae pv. syringae B728a	3	2	48
Pinellia ternata	2	2	49
Gluconobacter oxydans	22	11	20
Bos taurus x Bos indicus	2	0	51
Dorcoceras hygrometricum	4	4	45
Sphingobium sp. SYK-6	4	1	48
Aliivibrio salmonicida LFI1238	9	0	44
Microcoleus vaginatus	1	0	52
Streptomyces chattanoogensis	4	1	48
[Candida] glabrata CBS 138	16	8	29
Caldicellulosiruptor saccharolyticus	9	1	42
Cottus perifretum	4	0	48
Hyalella azteca	2	1	49
Listeria monocytogenes 10403S	10	3	39
Haemonchus contortus	3	3	46
Escherichia coli DH1	4	1	46
Erythrobacter litoralis	1	1	49
Saccharum sp.	5	3	43
West Nile virus	7	1	43
Escherichia coli O139:H28 str. E24377A	4	1	46
Rana pirica	3	1	47
Human betaherpesvirus 6B	21	20	10
Tigriopus californicus	3	3	45
uncultured soil bacterium	1	0	50
Alcanivorax borkumensis SK2	2	2	47
Heliconius melpomene malleti	1	1	48
Lactobacillus delbrueckii	9	3	38
Mycobacterium leprae	4	4	42
Bacteroides fragilis	6	2	42
Pyrobaculum aerophilum	2	1	47
Castanospermum australe	1	1	48
Schizosaccharomyces japonicus	6	4	40
Menidia beryllina	2	1	47
Giardia intestinalis	6	8	36
Treponema denticola	4	6	40
Schaalia odontolytica	1	0	49
Bifidobacterium	12	4	34
Junco hyemalis	1	1	48
Gambusia holbrooki	3	1	46
Brassica oleracea var. italica	5	2	42
Alternaria brassicicola	4	3	42
artificial sequences	4	2	43
Bacillus anthracis str. Ames	3	1	45
Heliconius melpomene plesseni	1	0	48
Escherichia coli str. K-12 substr. MC4100	2	1	46
Pseudomonas savastanoi pv. phaseolicola	7	2	40
Rana temporaria	1	0	48
Melampsora larici-populina	5	2	42
Lactobacillus reuteri F275	5	2	42
Rosa hybrid cultivar	6	4	38
Rhizobium etli CFN 42	9	3	36
Lactobacillus paralimentarius	8	2	38
Cottus	5	4	39
Lactobacillus sanfranciscensis	8	2	38
Lactobacillus curvatus	8	2	38
Musa acuminata	5	3	40
Desulfovibrio vulgaris	3	1	44
Lactobacillus sakei	8	2	38
Zea mays subsp. parviglumis	2	0	46
Lactobacillus pontis	8	2	38
Propionibacterium freudenreichii	6	5	37
Leuconostoc mesenteroides	8	2	38
Aedes albopictus	7	4	37
Xerophyta humilis	2	1	45
[Haemophilus] ducreyi 35000HP	6	2	40
Euprymna scolopes	1	1	45
Solenopsis invicta x Solenopsis richteri	1	0	46
Rhizophagus irregularis	3	2	42
Escherichia coli O127:H6 str. E2348/69	7	2	37
Gordonia sp. KTR9	7	3	36
Streptococcus sanguinis SK36	5	4	37
Streptococcus gordonii str. Challis	7	2	37
Lactococcus garvieae	6	3	37
Hungateiclostridium thermocellum	5	4	37
Burkholderia multivorans	7	1	38
Anopheles merus	4	2	40
Entamoeba invadens	4	3	39
Haemorhous mexicanus	4	1	41
Populus fremontii x Populus angustifolia	6	0	40
Komagataella phaffii	3	4	39
Asparagus officinalis	2	4	40
Tetranychus cinnabarinus	5	3	38
Marmota flaviventris	1	2	43
Pectobacterium wasabiae	2	1	42
Tuber melanosporum	5	2	38
Phycomyces blakesleeanus	4	3	38
Bifidobacterium bifidum	4	1	40
Escherichia coli str. K-12 substr. MG1655star	5	1	39
Caenorhabditis angaria	1	1	43
Trematomus bernacchii	4	2	39
Drosophila sproati	1	0	44
Acinetobacter baumannii ATCC 17978	8	5	32
Gluconobacter oxydans 621H	5	3	37
Caenorhabditis japonica	3	3	39
Staphylococcus aureus subsp. aureus MW2	30	3	12
Sarcophaga crassipalpis	3	2	40
Pyrus communis	5	3	37
Brevibacterium linens	8	3	34
Sarcophilus harrisii	3	3	39
Lactobacillus alimentarius	8	2	34
Lactobacillus amylovorus	8	2	34
Rhodospirillum rubrum	9	1	34
Turnip mosaic virus	3	3	38
Enterococcus casseliflavus	8	2	34
[Eubacterium] rectale	14	3	27
Enterococcus mundtii	8	2	34
Lactobacillus panis	8	2	34
Lactobacillus rossiae	8	2	34
Lactobacillus parabuchneri	8	2	34
Agrobacterium fabrum str. C58	5	4	35
Burkholderia cenocepacia H111	7	2	35
Lactobacillus frumenti	8	2	34
Mesorhizobium sp. N33	1	1	42
Zymoseptoria tritici	3	2	39
Colletotrichum orbiculare	3	2	39
Lactobacillus fructivorans	8	2	34
Lactobacillus pentosus	8	2	34
Pediococcus pentosaceus	8	2	34
Neurospora tetrasperma	3	1	40
Solenopsis richteri	1	0	43
Botryllus schlosseri	1	1	42
Dichomitus squalens	5	3	36
Lactobacillus buchneri	8	2	34
Weissella confusa	8	2	34
Lactobacillus hilgardii	8	2	34
Enterococcus hirae	8	2	34
Pediococcus acidilactici	8	2	34
Prochlorococcus marinus str. MIT 9313	5	3	36
Lactobacillus paraplantarum	8	2	34
Marchantia polymorpha	4	2	38
Lactobacillus farciminis	8	2	34
Lactobacillus	2	2	40
Leuconostoc citreum	8	2	34
Leuconostoc pseudomesenteroides	8	2	34
Staphylococcus lentus	8	2	34
Lactobacillus crispatus	8	2	34
Stylophora pistillata	3	1	40
Lactobacillus mindensis	8	2	34
Escherichia coli BL21(DE3)	8	4	31
Sphingobium chlorophenolicum L-1	3	1	39
Xanthomonas campestris pv. campestris	3	3	37
Dunaliella salina	4	4	35
Acomys cahirinus	4	3	36
Citrus unshiu	3	2	38
Shigella dysenteriae	3	1	39
sludge metagenome	1	0	42
Saccharomyces bayanus x Saccharomyces cerevisiae	4	2	37
Selaginella moellendorffii	8	9	26
Brucella abortus	6	3	34
Vicia villosa	1	1	41
Mycobacterium tuberculosis str. Erdman = ATCC 35801	4	0	39
Pyrus x bretschneideri	4	4	35
Populus davidiana	6	1	36
Salmonella enterica subsp. enterica serovar Typhimurium str. D23580	2	2	39
Porphyromonas gingivalis ATCC 33277	7	2	34
Salmo trutta fario	1	0	42
Mycobacterium avium subsp. paratuberculosis K-10	13	7	23
Mayetiola destructor	4	1	38
Thermoplasma acidophilum	3	1	39
Cenchrus americanus	5	2	36
Aliivibrio fischeri	4	2	36
Bacteroides	1	1	40
Lymphocryptovirus	32	10	0
Nuphar advena	4	3	35
Bacillus cereus ATCC 10987	5	1	36
Boechera divaricarpa	1	1	40
Parabacteroides	1	1	40
Staphylococcus aureus subsp. aureus Mu50	14	3	25
Collinsella	1	1	40
Bos grunniens	5	3	34
Varroa destructor	1	1	40
Tetraodon nigroviridis	7	6	29
Ruminococcus	1	1	40
Dugesia japonica	3	2	37
Oryza sativa f. spontanea	6	4	32
Lachnoclostridium phytofermentans	4	1	37
Prochlorococcus phage P-HM2	1	1	40
Clostridia	1	1	40
Nicrophorus vespilloides	3	3	35
Boechera lignifera	1	0	40
Bacteroides fragilis NCTC 9343	8	6	27
Metarhizium robertsii	6	2	33
Boechera schistacea	1	0	40
Heliconius erato favorinus	1	0	40
Staphylococcus aureus subsp. aureus RN4220	3	0	38
Heliconius erato amphitrite	1	0	40
Boechera retrofracta x Boechera stricta	1	0	40
Boechera duchesnensis	1	0	40
Piromyces finnis	1	2	38
Boechera crandallii	1	0	40
Boechera retrofracta	1	0	40
Francisella tularensis subsp. tularensis SCHU S4	3	2	36
Salamandra infraimmaculata	2	1	38
Heliconius erato emma	1	0	40
Bifidobacterium longum subsp. infantis ATCC 15697 = JCM 1222 = DSM 20088	7	3	31
Boechera polyantha	1	0	40
Ettlia oleoabundans	2	2	37
Colletotrichum graminicola	3	2	36
Raphanus sativus	4	2	34
Nicotiana langsdorffii x Nicotiana sanderae	2	0	38
Neotoma lepida	3	1	36
Rhadinovirus	31	9	0
Candida albicans SC5314	11	4	25
Teleopsis quinqueguttata	4	1	35
Camelina sativa	3	1	36
Anemonia viridis	6	1	33
Puccinia graminis f. sp. tritici	2	2	36
Trametes cinnabarina	4	3	33
Staphylococcus aureus subsp. aureus COL	14	2	24
Dengue virus 1	8	2	29
Theileria annulata	4	4	31
Haliotis asinina	1	2	36
Candidatus Pelagibacter sp. HTCC7211	8	1	30
Saccharomyces cerevisiae Vin13	3	0	36
Streptococcus mitis	4	0	35
Arabidopsis arenosa	6	4	29
Heliconius himera	4	1	34
Heliconius erato lativitta	4	1	34
Alicyclobacillus acidocaldarius	2	1	36
Fragaria vesca	4	5	30
Nannospalax ehrenbergi	4	2	33
Bifidobacterium animalis subsp. lactis Bl-04	2	1	36
Cucumis melo var. cantalupo	1	1	37
Peromyscus leucopus	2	1	36
delta proteobacterium NaphS2	1	2	36
Thellungiella	2	1	36
Geospiza fortis	2	1	36
Ptychodera flava	1	2	36
Vibrio cholerae O1 str. C6706	5	2	32
Staphylococcus epidermidis RP62A	20	6	12
Stenotrophomonas maltophilia	4	3	31
Salvelinus alpinus	2	0	36
Ostrea lurida	1	1	36
environmental samples	1	0	37
uncultured sulfate-reducing bacterium	1	1	36
Ostrea edulis	1	1	36
Helix lucorum	1	2	35
Exiguobacterium sibiricum 255-15	1	1	36
Pseudomonas savastanoi pv. phaseolicola 1448A	2	1	34
Nostoc sp. PCC 7120	4	3	30
Galdieria sulphuraria	2	1	34
Pseudomonas fluorescens Pf0-1	5	3	29
Bacillus subtilis subsp. subtilis str. SMY	1	0	36
Secale cereale	3	2	32
Gossypium	5	2	30
Brassica oleracea var. capitata	3	1	33
Epinephelus coioides	5	4	28
Anaxyrus boreas	1	1	35
Ophthalmotilapia ventralis	2	1	34
Gossypium longicalyx	1	0	36
Vitis aestivalis	1	0	36
aquatic metagenome	2	0	35
Streptomyces venezuelae ATCC 10712	6	4	27
environmental samples	1	0	36
Serendipita indica	3	2	32
Flavivirus	3	0	34
Prevotella ruminicola	2	1	34
Cellvibrio japonicus	5	2	30
Frangula alnus	30	7	0
Brugia pahangi	4	1	32
Sordaria macrospora	5	3	29
Thunnus orientalis	1	0	36
Zobellia galactanivorans	2	2	33
Capsaspora owczarzaki	1	3	33
Strombus gigas	5	1	31
Trichoderma hamatum GD12	1	2	34
Vitis vinifera subsp. sylvestris	2	2	32
Bacteroides fragilis 638R	7	3	26
groundwater metagenome	3	0	33
Cyanidioschyzon merolae strain 10D	6	3	27
Acropora digitifera	2	1	33
Desulfovibrio halophilus	1	2	33
Cottus rhenanus	4	0	32
Neisseria meningitidis MC58	4	4	28
Sulfolobus acidocaldarius	3	7	26
Bacillus amyloliquefaciens	2	2	32
Salmonella enterica subsp. enterica serovar Heidelberg	2	1	33
Scenedesmus vacuolatus	2	1	33
Megathyrsus maximus	1	2	33
Cannabis sativa	5	2	29
Pseudarthrobacter chlorophenolicus A6	3	2	31
Actinobacillus pleuropneumoniae serovar 1 str. 4074	4	0	32
Dermestes lardarius	29	6	0
Pachymenia carnosa	29	6	0
Polypedilum vanderplanki	1	1	33
Nannospalax galili	4	3	28
Listeria monocytogenes EGD	2	1	32
Bacillus thuringiensis	4	5	26
Acanthamoeba castellanii	2	4	29
Sodalis glossinidius	2	1	32
Streptococcus gallolyticus subsp. gallolyticus	10	1	24
Polistes metricus	2	1	32
Hebeloma cylindrosporum	5	2	28
Sporobolus alterniflorus	3	1	31
Megathura crenulata	29	6	0
Wigglesworthia glossinidia endosymbiont of Glossina morsitans	2	1	32
Dichelobacter nodosus	4	2	29
Meiothermus ruber	2	1	32
Micropterus dolomieu	1	2	32
Bdellovibrio bacteriovorus HD100	5	4	26
Botrytis cinerea B05.10	5	2	28
Quercus alba	29	6	0
Pandalus borealis	29	6	0
Senegalia senegal	29	6	0
Bothrops moojeni	29	6	0
Sphingomonas sp. LH128	4	1	30
Phtheirospermum japonicum	1	2	32
Dengue virus 2	8	2	25
Macacine alphaherpesvirus 1	16	18	0
Plutella xylostella	4	2	28
Human betaherpesvirus 6A	4	2	28
Fagus crenata	1	1	32
Arabidopsis thaliana x Arabidopsis lyrata	4	2	28
Drosophila simulans x Drosophila mauritiana	4	0	30
Serendipita vermifera	4	6	24
Candidatus Blochmannia floridanus	1	1	32
Vanderwaltozyma polyspora	6	2	26
Populus alba x Populus glandulosa	2	2	30
Rana muscosa	1	1	32
Temnothorax rugatulus	1	1	32
Prochlorococcus virus PSSP7	4	3	27
Capsella grandiflora	4	3	27
Streptococcus pyogenes M49 591	2	0	32
Lobosphaera incisa	1	1	32
Lactococcus lactis subsp. lactis KF147	2	0	32
Citrus junos	5	4	25
Pectobacterium atrosepticum SCRI1043	3	2	29
Streptomyces griseus subsp. griseus NBRC 13350	3	0	31
Bipolaris maydis	1	1	32
Streptomyces avermitilis	5	5	24
Capsicum chinense	3	3	28
Drosophila suzukii	2	2	30
Ruegeria pomeroyi	2	0	32
Xiphophorus maculatus x Xiphophorus hellerii	1	1	32
Pseudomonas phage PP7	1	1	32
Eschscholzia californica	1	1	32
Pseudomonas chlororaphis subsp. aureofaciens 30-84	5	2	27
Lactococcus lactis subsp. cremoris SK11	2	0	32
Vitis cinerea var. helleri x Vitis rupestris	4	0	30
Sesbania cannabina	2	1	30
Klebsiella pneumoniae subsp. pneumoniae MGH 78578	7	3	23
Pinctada fucata	2	1	30
Mycobacteroides abscessus	3	4	26
Volvox carteri	8	5	20
Staphylococcus aureus subsp. aureus N315	16	5	12
Methylomicrobium buryatense	3	2	28
Parasteatoda tepidariorum	4	4	25
Magnetospirillum magneticum AMB-1	3	2	28
Neofusicoccum parvum	1	2	30
Borreliella burgdorferi B31	22	3	8
Pseudomonas protegens Pf-5	13	2	18
Hordeum vulgare subsp. vulgare	3	3	27
Metallosphaera sedula	8	2	23
Rhodotorula	28	5	0
Perca fluviatilis	1	1	31
Photorhabdus laumondii subsp. laumondii TTO1	4	4	25
Actinosynnema pretiosum	2	2	29
Cytomegalovirus	27	6	0
Kluyveromyces marxianus	4	4	25
Actinidia chinensis	3	3	27
Margaritifera margaritifera	1	0	32
Prunus avium	2	3	27
Armillaria ostoyae	1	1	30
Portunus pelagicus	1	1	30
Lactococcus lactis subsp. cremoris UC509.9	1	1	30
Mercenaria mercenaria	1	1	30
Wolbachia pipientis	1	1	30
Ophthalmotilapia nasuta	1	1	30
Pyrococcus furiosus DSM 3638	5	2	25
Saccharolobus solfataricus P2	5	3	24
Rhodopseudomonas palustris CGA009	5	4	23
Chamelea gallina	1	1	30
Rhodococcus aetherivorans	1	1	30
Ramazzottius varieornatus	1	1	30
Triticum turgidum	3	2	27
Ixodes scapularis	5	3	24
Synechococcus sp. CC9311	3	3	26
Patiria miniata	4	2	26
Geobacter metallireducens	3	4	25
Ricordea yuma	1	1	30
Dengue virus 4	7	3	22
Psychrobacter arcticus 273-4	1	1	30
Rhizophagus irregularis DAOM 181602=DAOM 197198	1	1	30
Yersinia pseudotuberculosis YPIII	7	2	23
Hepacivirus C	6	3	22
Fungi	4	3	24
Vicia pannonica	1	1	29
Zostera marina	3	2	26
Aspergillus kawachii	3	1	27
Rosa chinensis	4	2	25
Zingiber officinale	4	2	25
Pseudo-nitzschia multiseries	3	4	24
Thiobacillus denitrificans ATCC 25259	3	2	26
Solanum phureja	3	2	26
Pisolithus microcarpus	2	2	27
Dehalococcoides	7	1	23
Populus alba	3	0	28
Cunninghamia lanceolata	5	4	21
Emberiza melanocephala	4	2	24
Aspergillus fumigatus A1163	1	2	27
Rapana venosa	2	1	27
Streptococcus virus DT1	1	2	27
Casuarina glauca	3	2	25
Lupinus albus	3	2	25
Anopheles arabiensis	2	2	26
Lentinus tigrinus	2	1	27
Meriones unguiculatus	4	4	22
Vibrio vulnificus CMCP6	5	5	20
Pseudomonas fluorescens SBW25	3	3	24
Neisseria gonorrhoeae FA 1090	3	2	25
Aspergillus fumigatus CEA10	1	1	28
Vitis labrusca x Vitis vinifera	4	2	24
Candidatus Protochlamydia amoebophila	2	3	25
Rana sierrae	1	1	28
Capsella rubella	7	5	18
Auxenochlorella pyrenoidosa	2	2	26
Nitrobacter winogradskyi	3	4	23
Streptomyces venezuelae	7	3	20
Acipenser sturio	3	3	24
Papilio xuthus	2	2	26
Triticum dicoccoides	3	0	27
Iridovirus	4	2	24
Delphinapterus leucas	2	1	27
Amblyomma americanum	1	1	28
Proteus mirabilis HI4320	6	1	23
Lactobacillus acidophilus NCFM	4	2	24
Hemerocallis lilioasphodelus	1	2	26
Pinus canariensis	2	0	27
Bacteroides ovatus	3	1	25
Lens culinaris	8	3	18
Vernicia fordii	5	2	22
Gossypium thurberi	1	1	27
Tannerella forsythia	1	2	26
environmental samples	1	0	28
Parhyale hawaiensis	5	2	22
Trichormus variabilis ATCC 29413	1	1	27
Prunus mume	3	4	22
Clostridium perfringens str. 13	5	2	22
coral metagenome	1	1	27
Influenza A virus (A/WSN/1933(H1N1))	3	4	22
Choristoneura fumiferana multiple nucleopolyhedrovirus	2	2	25
Phytophthora ramorum	4	3	22
Echinococcus granulosus	5	3	21
Campylobacter	6	1	22
Gossypium trilobum	1	1	27
Saccharomyces cerevisiae EC1118	2	0	27
Lepeophtheirus salmonis oncorhynchi	1	0	28
Hypericum perforatum	3	3	23
Rhizopus microsporus	2	2	24
Bactrocera dorsalis	5	3	20
Plasmodium cynomolgi ceylonensis	2	1	25
Bacteroides xylanisolvens	2	2	24
Streptomyces europaeiscabiei	1	0	27
Prevotella intermedia	1	1	26
Sinorhizobium fredii NGR234	2	2	24
Ricinus communis	6	4	18
Humulus lupulus	2	2	24
Cucurbita pepo	2	2	24
Xenotilapia leptura	1	0	27
Dickeya dadantii 3937	3	2	23
Xylella fastidiosa 9a5c	3	2	23
Curcuma longa	3	1	24
Escherichia coli O103:H25	1	0	27
aquifer metagenome	3	2	23
Tristaniopsis glauca	5	1	22
Xenotilapia tenuidentata	1	0	27
Xenotilapia ochrogenys	1	0	27
Dengue virus 3	7	2	19
Human alphaherpesvirus 3	2	2	24
Borrelia hermsii	3	1	24
Bdellovibrio bacteriovorus	2	0	26
Yersinia pseudotuberculosis IP 32953	7	2	19
Sulfolobus acidocaldarius DSM 639	4	4	20
Clostridium novyi NT	1	1	26
Saccharomyces uvarum	7	2	19
Xenotilapia flavipinnis	1	0	27
Beauveria bassiana ARSEF 2860	6	3	19
Fusarium neocosmosporiellum	1	1	25
Herpesvirus saimiri (strain 11)	15	11	1
Arabidopsis suecica	6	3	18
Plasmodium falciparum Dd2	3	0	24
Diospyros lotus	1	2	24
Populus	12	3	12
Staphylococcus xylosus	2	1	24
Arabidopsis thaliana x Arabidopsis arenosa	4	4	19
Heligmosomoides polygyrus bakeri	3	3	21
Bifidobacterium bifidum PRL2010	8	2	17
Procambarus virginalis	5	2	20
Latrodectus hesperus	1	3	23
Human immunodeficiency virus	3	3	21
Labrus bergylta	1	2	24
Bifidobacterium animalis subsp. lactis	5	4	18
Phaeobacter inhibens	2	1	24
Edwardsiella ictaluri 93-146	2	1	24
Pseudomonas putida DOT-T1E	2	1	24
Oryzias melastigma	3	2	22
Solanum tuberosum subsp. andigenum	3	0	24
Dromaius novaehollandiae	2	1	24
Apis mellifera ligustica	1	1	24
Callosobruchus maculatus	1	1	24
Neospora caninum	3	4	19
Human herpesvirus 8 strain rKSHV.219	5	1	20
Vachellia cornigera	1	1	24
Monomorium pharaonis	2	1	23
Campylobacter jejuni RM1221	5	2	19
Thermococcus gammatolerans	1	1	24
Arapaima gigas	1	1	24
Cladonia rangiferina	1	1	24
Sporobolus stapfianus	1	1	24
Trichophyton benhamiae	2	0	24
Chenopodium quinoa	1	1	24
Silene latifolia	4	3	19
Mus sp.	3	0	23
Dasypus novemcinctus	5	3	18
Trichoderma harzianum	3	1	22
Lactobacillus paracasei ATCC 334	4	2	20
Desulfotomaculum reducens MI-1	1	1	24
Vanessa cardui	2	2	22
Mamestra configurata nucleopolyhedrovirus A	1	1	24
Ophiocordyceps kimflemingiae	1	1	24
Saccharomyces cerevisiae x Saccharomyces kudriavzevii	4	0	22
Brevibacterium aurantiacum	5	1	20
Geobacter metallireducens GS-15	2	4	20
Sulfolobus islandicus REY15A	3	3	20
Pseudomonas chlororaphis	2	2	22
Corbicula fluminea	1	1	24
Sthenoteuthis oualaniensis	1	1	24
Vitis labrusca	1	1	24
Schistocerca gregaria	4	4	18
Carcinus maenas	1	1	24
Streptomyces griseus	11	2	13
Pyrus pyrifolia	6	3	17
Mus musculus domesticus x M. m. molossinus	2	2	22
Pseudomonas putida S12	1	1	24
Pseudomonas laurylsulfativorans	1	1	24
Ferroglobus placidus DSM 10642	11	2	13
Thermococcus paralvinellae	2	2	22
Shigella flexneri 2a str. 2457T	6	2	18
uncultured organism	3	0	23
Listeria monocytogenes LO28	3	1	22
uncultured ammonia-oxidizing archaeon	2	0	23
Streptococcus suis 05ZYH33	6	2	17
Vigna unguiculata subsp. sesquipedalis	1	0	24
Streptococcus agalactiae A909	6	3	16
Acinetobacter baumannii ATCC 19606 = CIP 70.34 = JCM 6841	1	2	22
Ectocarpus siliculosus	1	8	16
Culex pipiens	1	0	24
Cebus capucinus	1	0	24
Salmonella enterica subsp. enterica serovar Saintpaul	1	0	24
uncultured marine microorganism	2	2	21
Lactobacillus casei str. Zhang	3	1	21
Populus sp. cv. 'Okanese'	1	0	24
Uraeginthus cyanocephalus	1	0	24
Solanum nigrum	1	0	24
Blastomyces dermatitidis	1	0	24
Coregonus lavaretus	1	0	24
Ostrinia nubilalis	2	1	22
Eremothecium gossypii	1	0	24
Pseudonocardia dioxanivorans CB1190	3	1	21
Populus sp. cv. 'Walker'	1	0	24
Cryptococcus gattii VGIII	1	1	23
Bacillus subtilis subsp. subtilis NCIB 3610 = ATCC 6051	3	1	21
Streptococcus dysgalactiae subsp. equisimilis GGS_124	3	0	22
Tachysurus vachellii	5	1	19
Ploceus bicolor	1	0	24
Tulasnella calospora	4	3	18
Aliivibrio fischeri ES114	1	1	23
Papio	1	0	24
Vibrio campbellii	3	0	22
Bifidobacterium longum subsp. infantis	2	2	21
Nilaparvata lugens	4	3	18
Neocallimastix californiae	1	1	23
Burkholderia pseudomallei Bp22	1	0	24
Mucor circinelloides	3	3	19
Citrus clementina	5	2	18
Heliothis virescens	3	3	19
Sarcophaga bullata	2	1	22
Anguilla rostrata	3	1	20
Ichthyophthirius multifiliis	2	1	21
Phodopus sungorus	2	1	21
Macrobrachium nipponense	7	4	13
Frankia alni ACN14a	1	2	21
Calanus finmarchicus	2	1	21
Arcobacter butzleri	1	1	22
Dictyocaulus viviparus	1	1	22
Cryptococcus neoformans var. neoformans JEC21	16	2	6
Vitis cinerea	1	1	22
Acinetobacter sp. 478810	2	2	20
Clostridium autoethanogenum	2	2	20
Eucalyptus nitens	2	2	20
Sindbis virus	3	4	17
Pyricularia oryzae 70-15	3	2	19
Arabidopsis arenosa x Arabidopsis thaliana	3	1	20
Helicobacter pylori NCTC 11637 = CCUG 17874 = ATCC 43504	1	1	22
Papio papio	1	0	23
Acetobacter aceti NBRC 14818	3	1	20
Salmonella enterica subsp. enterica serovar Typhimurium str. ATCC 14028	6	1	17
Acinetobacter sp. 983759	2	2	20
Acinetobacter sp. 1592897	2	2	20
Acinetobacter baumannii 1457504	2	2	20
Methanobrevibacter smithii ATCC 35061	3	1	20
Bipolaris sorokiniana	2	4	18
Leishmania tarentolae	2	1	21
Eggerthella lenta DSM 2243	1	1	22
Acinetobacter baumannii 34654	2	2	20
Acinetobacter baumannii 1207552	2	2	20
Acinetobacter baumannii 1428368	2	2	20
Acinetobacter sp. 1000160	2	2	20
Salmonella enterica subsp. enterica serovar Typhi str. Ty2	4	7	13
Lactobacillus delbrueckii subsp. bulgaricus ATCC BAA-365	2	2	20
Trypanosoma brucei brucei TREU927	4	4	15
Litchi chinensis	2	3	18
Latrodectus geometricus	1	2	20
Cenococcum geophilum 1.58	2	3	18
Trichomonas vaginalis	1	2	20
Didelphis virginiana	3	4	16
Loxodonta africana	3	4	16
Planoprotostelium fungivorum	3	2	18
Bacillus subtilis subsp. spizizenii	1	0	22
Bactrocera oleae	2	1	20
Staphylococcus aureus subsp. aureus MRSA252	12	2	9
Haemophilus influenzae Rd KW20	2	3	18
Solanum habrochaites	3	3	17
Chrysanthemum x morifolium	3	2	18
Paeonia ostii	2	1	20
Saccharum hybrid cultivar Q117	2	0	21
Sphingomonas wittichii	2	2	19
Human papillomavirus type 16	4	1	18
Xanthomonas retroflexus	1	5	17
Euphausia superba	1	2	20
Leucoraja erinacea	4	4	15
Dirofilaria immitis	3	2	18
Streptomyces lividans	5	0	18
Sphinx1.76-related DNA	1	1	21
Acinetobacter sp. 1564232	2	1	20
Symbiodinium sp. A1	3	2	18
Aspergillus niger CBS 513.88	22	1	0
Nicotiana plumbaginifolia	1	1	21
Azoarcus sp.	5	0	18
Rhagoletis pomonella	2	2	18
Pinctada imbricata	2	3	17
Macacine gammaherpesvirus 4	10	6	6
Rhizophagus intraradices	3	1	18
Campylobacter jejuni subsp. jejuni 81116	4	2	16
Parabacteroides distasonis ATCC 8503	5	2	15
Lactobacillus reuteri 100-23	3	1	18
Thermococcus onnurineus NA1	3	2	17
Amycolatopsis mediterranei S699	1	1	20
Heterobasidion irregulare	2	1	19
Streptococcus thermophilus CNRZ1066	1	1	20
Steatoda grossa	1	2	19
Burkholderia cenocepacia J2315	8	2	12
Sphingomonas paucimobilis	2	2	18
Catostomus macrocheilus	1	0	21
Prochlorococcus marinus str. MIT 9312	2	1	19
Populus simonii	4	0	18
Dickeya dadantii	1	1	20
Streptomyces sp. SirexAA-E	1	1	20
Streptomyces hygroscopicus subsp. jinggangensis 5008	3	1	18
Nicotiana sylvestris	3	1	18
Tupaia chinensis	3	3	16
Larimichthys crocea	4	3	15
Anaeromyces robustus	1	1	20
Dinoponera quadriceps	1	1	20
Euplotes vannus	3	1	18
Mycoplasma genitalium	2	2	18
Streptomyces scabiei	3	4	15
Streptomyces clavuligerus ATCC 27064	1	1	20
Xylella fastidiosa Temecula1	3	2	17
Streptococcus pyogenes MGAS6180	2	2	18
Ehrlichia chaffeensis str. Arkansas	3	1	17
Moniliophthora perniciosa	3	2	16
Bradyrhizobium sp. ORS 285	2	1	18
Neisseria meningitidis 8013	2	3	16
Saccharum hybrid cultivar SP70-1143	3	2	16
Vibrio campbellii ATCC BAA-1116	5	1	15
Quercus robur	3	4	14
Pan troglodytes troglodytes	3	0	18
Rhagoletis zephyria	1	0	20
Moniezia expansa	3	2	16
Geospiza fuliginosa	2	1	18
Pseudomonas knackmussii	3	1	17
unidentified microorganism	2	2	17
Xenopus tropicalis x Xenopus laevis	4	3	14
manure metagenome	1	0	20
Trichoderma guizhouense	1	2	18
Coregonus maraena	1	0	20
Streptococcus virus 2972	1	2	18
Solanum lycopersicum x Solanum pimpinellifolium	2	1	18
Francisella tularensis subsp. holarctica LVS	3	1	17
Triticum polonicum	2	1	18
Vitis amurensis	3	5	13
Dermacentor andersoni	1	2	18
Pteropus alecto	2	3	16
Anser cygnoides	1	2	18
Thermococcus kodakarensis	3	2	16
Catharus ustulatus	1	1	19
Vibrio cholerae C6706	3	2	16
Metarhizium anisopliae	4	2	15
Trichinella spiralis	4	4	13
Lactobacillus delbrueckii subsp. bulgaricus	6	2	13
Papio sp.	1	0	20
Penicillium decumbens	3	2	16
Ophiocordyceps sinensis	1	1	18
Takifugu rubripes	7	4	9
compost metagenome	1	0	19
Clostridium botulinum A str. ATCC 3502	9	4	7
Pachycladon enysii	2	1	17
Noccaea caerulescens	3	2	15
Vigna subterranea	2	2	16
Zymomonas mobilis subsp. mobilis	1	2	17
Sorghum propinquum	2	1	17
Leptobrachium boringii	1	1	18
Rickettsia conorii str. Malish 7	3	3	14
Human alphaherpesvirus 1 strain KOS	2	2	16
Triticum urartu	2	1	17
Hafnia alvei	1	1	18
Dengue virus	5	0	15
Mucor circinelloides f. lusitanicus	2	2	16
Lithognathus mormyrus	4	2	14
Streptococcus pyogenes MGAS15252	1	1	18
Acinetobacter oleivorans DR1	7	2	11
Seriola lalandi dorsalis	1	1	18
Acropora gemmifera	1	1	18
Diabrotica virgifera virgifera	1	1	18
Corynebacterium diphtheriae	2	0	18
Setaria italica	4	3	13
Dictyostelium purpureum	1	1	18
Haloferax volcanii DS2	2	2	16
Pseudomonas virus PaP3	1	1	18
Enteromyxum leei	2	0	18
Streptococcus pyogenes M1 GAS	3	1	16
Myotis daubentonii	1	1	18
Onthophagus nigriventris	1	0	19
Thiomonas sp. CB2	1	1	18
Seminavis robusta	1	1	18
[Enterobacter] lignolyticus SCF1	1	1	18
Halomonas sp. HL48	1	2	17
Ustilago hordei	1	1	18
Escherichia coli HS	4	2	14
Geobacter uraniireducens	2	0	18
Salmonella	14	4	2
Zygosaccharomyces bailii	1	1	18
Drosophila mettleri	1	1	18
Venturia canescens	1	1	18
Acromyrmex echinatior	1	1	18
Chaetoceros sp.	1	1	18
Loxia curvirostra	2	0	18
Salmonella enterica subsp. enterica serovar Paratyphi B	1	0	18
Piriqueta cistoides subsp. caroliniana	1	0	18
Pantherophis guttatus	3	1	15
Polistes fuscatus	1	1	17
Rhodotorula toruloides	3	4	12
Macaca radiata	3	0	16
Ralstonia solanacearum UW551	2	1	16
Shewanella baltica OS223	1	0	18
[Clostridium] scindens ATCC 35704	4	1	14
Staphylococcus haemolyticus JCSC1435	18	1	0
Haemophilus influenzae 86-028NP	1	2	16
Ralstonia solanacearum GMI1000	2	1	16
Myotis ricketti	3	3	13
Vitis sp. cv. 'Norton'	1	0	18
Hungateiclostridium thermocellum 27405	2	1	16
Mumps rubulavirus	2	2	15
[Clostridium] spiroforme DSM 1552	4	1	14
Staphylococcus aureus subsp. aureus USA300_FPR3757	3	3	13
Dorea longicatena DSM 13814	4	1	14
Triticum dicoccon x Aegilops tauschii subsp. strangulata	2	0	17
Polistes canadensis	1	1	17
Chlamydia pneumoniae AR39	18	1	0
Shigella flexneri 2a str. 301	2	2	15
Triticum	1	0	18
Cryphonectria parasitica	5	2	12
Murine respirovirus	2	2	15
Ehrlichia ruminantium	2	3	14
Morus alba var. atropurpurea	2	1	16
Streptomyces natalensis ATCC 27448	1	0	18
Nitrosopumilus maritimus SCM1	2	2	15
Paxillus involutus ATCC 200175	6	1	12
Thermus scotoductus SA-01	1	1	17
Shewanella baltica OS195	1	0	18
Bacteroides uniformis ATCC 8492	4	1	14
Shewanella baltica OS185	1	0	18
Haemulon flavolineatum	1	1	17
Coxiella burnetii RSA 493	18	1	0
Drosophila santomea	3	1	15
Picea jezoensis	1	0	18
Megalobrama amblycephala	3	3	13
Ixodes ricinus	3	3	13
Pyrococcus abyssi	2	2	15
Prunus armeniaca	4	3	12
Gigaspora rosea	2	2	15
unidentified plasmid	4	3	12
Ralstonia solanacearum	4	2	13
Picea omorika	1	0	18
Human herpesvirus 5 strain Towne	1	0	18
Chironomus tentans	1	3	15
Chlamydia trachomatis D/UW-3/CX	18	1	0
Bacteroides sp. WH2	4	1	14
Shewanella baltica OS155	1	0	18
Bigelowiella natans	2	2	15
Chlamydia caviae GPIC	18	1	0
Staphylococcus epidermidis ATCC 12228	18	1	0
Blautia obeum ATCC 29174	4	1	14
Bacteroides vulgatus ATCC 8482	4	1	14
Moraxella catarrhalis RH4	1	0	18
Fusarium fujikuroi IMI 58289	2	1	16
Sulfitobacter sp. SA11	1	3	15
Cordyceps militaris	4	3	12
Ictalurus furcatus	3	1	15
Chlamydia muridarum	18	1	0
Citrus	14	5	0
Acropora cervicornis	2	1	16
Callorhinchus milii	2	3	13
Macaca	2	1	15
Streptococcus oralis	2	1	15
Chlorostoma funebralis	1	1	16
Cronartium quercuum	1	1	16
Cherax quadricarinatus	2	2	14
Pinus elliottii	1	1	16
environmental samples	1	0	17
Agaricus bisporus var. bisporus H97	1	1	16
Pachycladon fastigiatum	2	1	15
Agarophyton tenuistipitatum	1	1	16
Gorilla gorilla gorilla	2	0	16
Paenibacillus larvae	1	1	16
Pachycladon novaezelandiae	1	0	17
Chlorogloeopsis fritschii PCC 9212	1	1	16
Leuconostoc gelidum subsp. gasicomitatum LMG 18811	2	1	15
Pyronema omphalodes CBS 100304	2	1	15
Syzygium longifolium	3	1	14
Measles morbillivirus	2	3	13
Trametes versicolor	3	3	12
Plasmodium chabaudi	2	2	14
Orchesella cincta	1	1	16
Xanthomonas oryzae pv. oryzae	3	2	13
Candidatus Phytoplasma asteris	3	1	14
Petunia axillaris	2	1	15
Morone saxatilis	1	1	16
Brassica rapa subsp. chinensis	3	2	13
Cupriavidus necator H16	2	1	15
Acidithiobacillus ferrooxidans ATCC 23270	2	2	14
Macrostomum lignano	1	1	16
Pasteurella multocida subsp. multocida str. Pm70	3	3	12
Synthetic plasmid	3	3	12
Fukomys damarensis	1	1	16
Tetrahymena thermophila CU428	2	2	14
Atta vollenweideri	1	1	16
Acanthopleura hirtosa	1	1	16
Allochromatium vinosum DSM 180	3	2	13
Serpula lacrymans var. lacrymans S7.9	2	1	15
Stenotrophomonas maltophilia K279a	2	2	14
Bifidobacterium longum NCC2705	4	2	12
Yersinia pestis CO92	9	3	6
Vitis cinerea var. helleri x Vitis riparia	2	0	16
Trametes sanguinea	2	1	15
Holothuria glaberrima	1	1	16
Verbena bonariensis	3	1	14
Carollia perspicillata	1	1	16
Salmonella enterica subsp. enterica serovar Dublin	2	0	16
Saccharina japonica	3	2	13
Lilium maculatum	1	2	15
Coffea canephora	2	2	13
Drosophila hawaiiensis	1	1	15
Miniopterus schreibersii	1	2	14
Rift Valley fever virus	3	0	14
Trichoplusia ni	2	2	13
Alnus glutinosa	1	1	15
Leptospira interrogans	4	4	9
Citrus sinensis x Citrus trifoliata	2	2	13
Scheffersomyces stipitis CBS 6054	3	2	12
Actinobacillus succinogenes 130Z	2	2	13
Burkholderia seminalis	1	0	16
beetle metagenome	1	0	16
Bifidobacterium breve 12L	5	1	11
Xenopus laevis x Xenopus muelleri	3	0	14
Sodalis praecaptivus	1	1	15
Curvibacter sp. AEP1.3	1	1	15
plant metagenome	1	0	16
Streptomyces bingchenggensis	1	0	16
Miniopterus natalensis	1	0	16
Auriculariopsis ampla	1	1	15
Butyrivibrio hungatei	2	3	12
Mus musculus musculus	3	2	12
Aureococcus anophagefferens	3	2	12
Wolfiporia cocos	2	2	13
Ceriops tagal	1	1	15
Rickenella mellea	2	1	14
Azotobacter vinelandii	1	1	15
Brucella ovis	5	2	10
Erythranthe guttata	5	3	9
Cloeon viridulum	1	1	15
Halomonas sp. HL58	1	2	14
Methanosarcina acetivorans C2A	1	1	15
Streptococcus suis P1/7	1	0	16
Leptospira interrogans serovar Manilae	2	1	14
Petunia integrifolia subsp. inflata	1	1	15
Myotis brandtii	1	1	15
Lonicera japonica	3	2	12
Skeletonema marinoi	1	1	15
Leptospira interrogans serovar Copenhageni str. Fiocruz L1-130	2	1	14
Metallosphaera sedula DSM 5348	3	0	14
Anser anser	2	1	14
Ctenopharyngodon idella	5	1	11
Aphanomyces euteiches	1	1	15
Fibrobacter succinogenes subsp. succinogenes S85	2	1	14
Ammopiptanthus mongolicus	3	2	12
Acipenser schrenckii	3	1	13
Haloxylon ammodendron	2	2	13
Dehalococcoides mccartyi BAV1	7	1	9
Aegilops tauschii x Triticum turgidum	2	0	15
Avena sativa/Zea mays addition line	1	2	14
Ignicoccus hospitalis KIN4/I	1	0	16
Phaeocystis antarctica	1	1	15
Drosophila silvestris	1	1	15
Rosa roxburghii	1	1	15
Macaca fuscata	3	1	13
Naegleria gruberi	1	1	15
Equus asinus	4	3	9
Corynebacterium pseudotuberculosis	1	1	14
Oryza longistaminata	1	0	15
Thermothelomyces thermophilus	2	3	11
Arillastrum gummiferum	3	1	12
Cronobacter sakazakii	2	2	12
Corynebacterium phage BFK20	1	1	14
Plasmodium yoelii yoelii 17XNL	2	2	12
Paraburkholderia phymatum STM815	2	1	13
Klebsiella pneumoniae MGH 78578	2	2	12
Phaeoacremonium minimum	2	1	13
Citrus limonia	4	0	12
Fagopyrum tataricum	2	3	11
Brucella canis	4	0	12
Burkholderia mallei	5	11	0
Ruminiclostridium cellulolyticum	2	2	12
Salmonella enterica subsp. enterica serovar Muenchen	1	0	15
Bartonella quintana	2	2	12
Mesorhizobium japonicum MAFF 303099	3	1	12
Spodoptera frugiperda ascovirus 1a	1	1	14
Ophrys fusca	1	1	14
Brucella suis 1330	3	1	12
Homo sapiens x Mus musculus hybrid cell line	2	1	13
Escherichia coli 401140	3	1	12
Escherichia coli DH5[alpha]	3	1	12
Pseudomonas	14	2	0
Bacillus megaterium	2	0	14
Pecten maximus	1	1	14
Bacillus halodurans	2	2	12
Piloderma croceum	3	1	12
Lasiodiplodia theobromae	1	3	12
Yellow fever virus	5	0	11
Aquilegia formosa	1	0	15
synthetic RNA	3	6	7
bovine gut metagenome	2	1	13
Symplocarpus renifolius	2	2	12
Populus ussuriensis	1	3	12
dust metagenome	2	0	14
Caenorhabditis nigoni	2	2	12
(Citrus unshiu x Citrus sinensis) x Citrus reticulata	2	1	13
Salmonella enterica subsp. enterica serovar Newport	1	0	15
Saccharum hybrid cultivar	2	2	12
Desulfitobacterium hafniense Y51	2	0	14
Potamopyrgus antipodarum	3	1	12
Salvia miltiorrhiza	3	2	11
Methylosinus trichosporium	2	2	12
Methylorubrum extorquens	2	1	13
Lentinula edodes	4	3	9
Eumetopias jubatus	1	2	13
Arvicanthis niloticus	2	1	12
Papilio zelicaon	2	1	12
Hydra oligactis	1	1	13
Esox lucius	1	1	13
Influenza B virus	2	2	11
Clostridium sporogenes	2	0	13
Erynnis propertius	2	1	12
Crimean-Congo hemorrhagic fever orthonairovirus	3	0	12
Tachysurus fulvidraco	4	2	9
Pseudomonas fluorescens BBc6R8	1	1	13
Streptococcus gallolyticus UCN34	3	0	12
Phytophthora parasitica INRA-310	1	0	14
Fragilariopsis cylindrus	2	2	11
Salmonella enterica subsp. enterica serovar Choleraesuis	2	0	13
Acropora formosa	1	1	13
Ceratonia siliqua	11	4	0
[Eubacterium] eligens	13	2	0
Scylla paramamosain	3	2	10
Ferroglobus placidus	3	0	12
Exophiala dermatitidis	2	2	11
Rickettsia conorii	2	1	12
Glaesserella parasuis	2	1	12
Mycobacterium tuberculosis HN878	1	1	13
human nasopharyngeal metagenome	1	0	14
Hipposideros armiger	1	2	12
Vibrio coralliilyticus	2	1	12
Ceratina calcarata	1	2	12
Batrachochytrium dendrobatidis	2	1	12
Oreolalax rhodostigmatus	1	1	13
Rhodobacter sphaeroides ATCC 17025	1	2	12
Lactobacillus delbrueckii subsp. bulgaricus 2038	1	2	12
Bacillus methanolicus	3	2	10
Ananas comosus	2	2	11
Manduca sexta	1	2	12
Bursaphelenchus xylophilus	2	3	10
Trypanosoma congolense	3	3	9
Plasmodium chabaudi chabaudi	1	2	12
Anopheles stephensi	3	3	9
Butyrivibrio proteoclasticus	1	2	12
Mus musculus molossinus	2	1	12
Chlorocebus aethiops vervet	1	0	14
Solanum lycopersicum var. cerasiforme	3	2	10
Xanthomonas citri pv. citri str. 306	2	1	12
Cuscuta pentagona	2	2	11
Camponotus castaneus	1	2	12
Ustilago maydis 521	3	1	11
Staphylococcus aureus USA300-0114	2	1	12
Capsella orientalis	1	2	12
Candidatus Atelocyanobacterium thalassa	1	2	12
Gossypium tomentosum	3	0	12
Athelia rolfsii	2	2	11
Plecoglossus altivelis	2	2	11
Mus musculus castaneus	3	2	10
Antheraea pernyi	2	1	12
Haematobia irritans	3	1	10
Hydra viridissima	1	1	12
Wickerhamomyces anomalus	1	1	12
Nicotiana rustica	1	1	12
Matthiola incana	2	1	11
Rickettsia prowazekii	5	6	3
Penaeus merguiensis	1	1	12
Schima superba	1	1	12
Eubalaena glacialis	1	1	12
Corylus avellana	3	1	10
Human poliovirus 1	1	2	11
Escherichia virus Lambda	4	3	7
Colletotrichum fructicola	1	1	12
Human papillomavirus type 18	2	1	11
Ehrlichia sp. HF	1	1	12
Acidiphilium sp. PM	1	1	12
Enterobacter soli	1	1	12
Saccharomyces cerevisiae CEN.PK113-7D	2	0	12
Pantoea ananatis LMG 2665	1	1	12
Ehrlichia chaffeensis str. Osceola	1	1	12
Ehrlichia chaffeensis str. Saint Vincent	1	1	12
Ehrlichia chaffeensis str. Wakulla	1	1	12
Vitis quinquangularis	1	1	12
Vernicia montana	1	1	12
Paracoccus denitrificans PD1222	2	0	12
Manacus vitellinus	1	1	12
Pachycladon cheesemanii	1	0	13
Andrographis paniculata	1	1	12
Turicibacter sanguinis	1	1	12
Kluyveromyces lactis x Kluyveromyces wickerhamii	1	1	12
Colletotrichum higginsianum	1	1	12
Nomascus leucogenys	5	3	6
Leishmania	12	2	0
Hepatitis C virus subtype 1a	1	1	12
Melopsittacus undulatus	2	0	12
Hirudo medicinalis	1	1	12
Cymbidium ringspot virus	4	3	7
Festuca arundinacea	3	2	9
Schizosaccharomyces octosporus	2	3	9
Phaseolus coccineus	4	2	8
Panax ginseng	1	1	12
Nicotiana glauca	1	1	12
Lactobacillus acetotolerans	1	1	12
Serratia liquefaciens	1	1	12
Flavobacterium columnare	1	1	12
Morella rubra	1	1	12
Ehrlichia chaffeensis str. West Paces	1	1	12
Ehrlichia chaffeensis str. Jax	1	1	12
Cryptococcus neoformans var. neoformans XL280	1	1	12
Mycobacterium phage Crossroads	1	1	12
Zygosaccharomyces parabailii	1	1	12
Photobacterium galatheae	2	1	11
phototrophic enrichment cultured UCC-O	1	1	12
Mus musculus papillomavirus type 1	1	1	12
mixed DNA library	1	1	12
Lactococcus garvieae 21881	2	0	12
Phaeobacter italicus	1	1	12
chicken gut metagenome	1	1	12
Capsella bursa-pastoris	1	1	12
Suillus luteus	3	1	10
Ulva lactuca	2	1	11
Arabidopsis lyrata subsp. petraea	2	0	12
Strophostyles helvola	1	1	12
Pinus massoniana	2	2	10
Agrobacterium sp. ATCC 31749	1	1	12
Chrysanthemum	1	1	12
Carassius gibelio	1	1	12
Nicotiana bonariensis	1	1	12
Mycobacterium marinum M	1	1	12
Clostridium perfringens SM101	1	0	13
gamma proteobacterium HTCC2207	1	1	12
Bacillus velezensis FZB42	1	1	12
Cercospora zeina	2	2	10
Temora longicornis	1	1	12
Hyphomonas neptunium ATCC 15444	1	1	12
Aethionema arabicum	1	1	12
Procotyla fluviatilis	1	1	12
Coccidioides immitis RS	1	1	12
Lactococcus garvieae 8831	2	0	12
Ehrlichia chaffeensis str. Heartland	1	1	12
Ehrlichia chaffeensis str. Liberty	1	1	12
Pseudomonas veronii 1YdBTEX2	1	1	12
Cryptocarya concinna	1	1	12
Xanthomonas citri pv. citri	1	1	12
Saccharum hybrid cultivar SP90-1638	2	0	12
Pectobacterium carotovorum subsp. brasiliensis PBR1692	1	1	12
Crassostrea angulata	2	1	11
Desulfocurvibacter africanus subsp. africanus str. Walvis Bay	1	1	12
Drosophila melanogaster x Drosophila sechellia	3	3	8
Acropora hyacinthus complex sp. E JTL-2012	1	1	12
Lichtheimia hyalospora	1	1	12
Xanthomonas oryzae pv. oryzicola BLS256	6	2	6
Escherichia coli UTI89	3	1	10
uncultured microorganism	1	1	12
Streptopelia risoria	2	0	12
Odontobutis potamophila	1	1	12
Saccharum officinarum complex	1	1	12
Rhodococcus jostii	2	2	10
Streptococcus anginosus	2	1	11
Moringa oleifera	2	2	10
Artibeus jamaicensis	1	1	12
Heligmosomoides polygyrus	2	2	10
Nicotiana clevelandii	1	1	12
Trichoderma asperellum	1	1	12
Streptomyces natalensis	2	2	10
Ampelomyces quisqualis	1	2	11
Salmonella enterica subsp. enterica serovar Paratyphi C	2	0	12
Aloe vera	2	1	11
Eucalyptus camaldulensis	1	1	12
Gelatoporia subvermispora	2	2	9
Litomosoides sigmodontis	3	2	8
Aquifex aeolicus	1	1	11
Drosophila sp. (in: Insecta)	1	0	12
Gallus	1	2	10
Nicotiana	1	0	12
Listeria innocua	10	1	2
Polyporus brumalis	1	1	11
Xanthomonas oryzae pv. oryzicola	2	2	9
Serapias vomeracea	2	2	9
Eisenia andrei	1	0	12
Epinephelus tauvina	2	1	10
Pyricularia oryzae KJ201	4	1	8
Methylobacter tundripaludum 21/22	2	2	9
Bordetella pertussis B1917	1	0	12
Bordetella pertussis B1920	1	0	12
Drosophila mojavensis sonorensis	1	0	12
Drosophila mojavensis wrigleyi	1	0	12
Komagataella phaffii GS115	1	0	12
Burkholderia glumae BGR1	2	2	9
Haemulon macrostomum	1	1	11
Glaesserella parasuis SH0165	2	2	9
Bradyrhizobium diazoefficiens	2	1	10
environmental samples	1	0	12
Vibrio natriegens NBRC 15636 = ATCC 14048 = DSM 759	2	3	8
Drosophila mojavensis mojavensis	1	0	12
Grosmannia clavigera	1	2	10
Lupinus angustifolius	2	2	9
Picea	12	1	0
Aeromonas veronii	2	2	9
Streptococcus salivarius	2	1	10
Vulpes lagopus	1	0	12
Escherichia coli ATCC 8739	3	2	8
[truncated: 2,644 more rows]
