# Supplementary material for: Dynamic transcriptional and chromatin accessibility landscape of medaka embryogenesis
Source: HighWire-hosted journal article supplement (doi:10.1101/gr.258871.119), 2020-06-01
Supplement: Supplemental_Fig_S1.pdf [file Supplemental_Fig_S1.pdf]

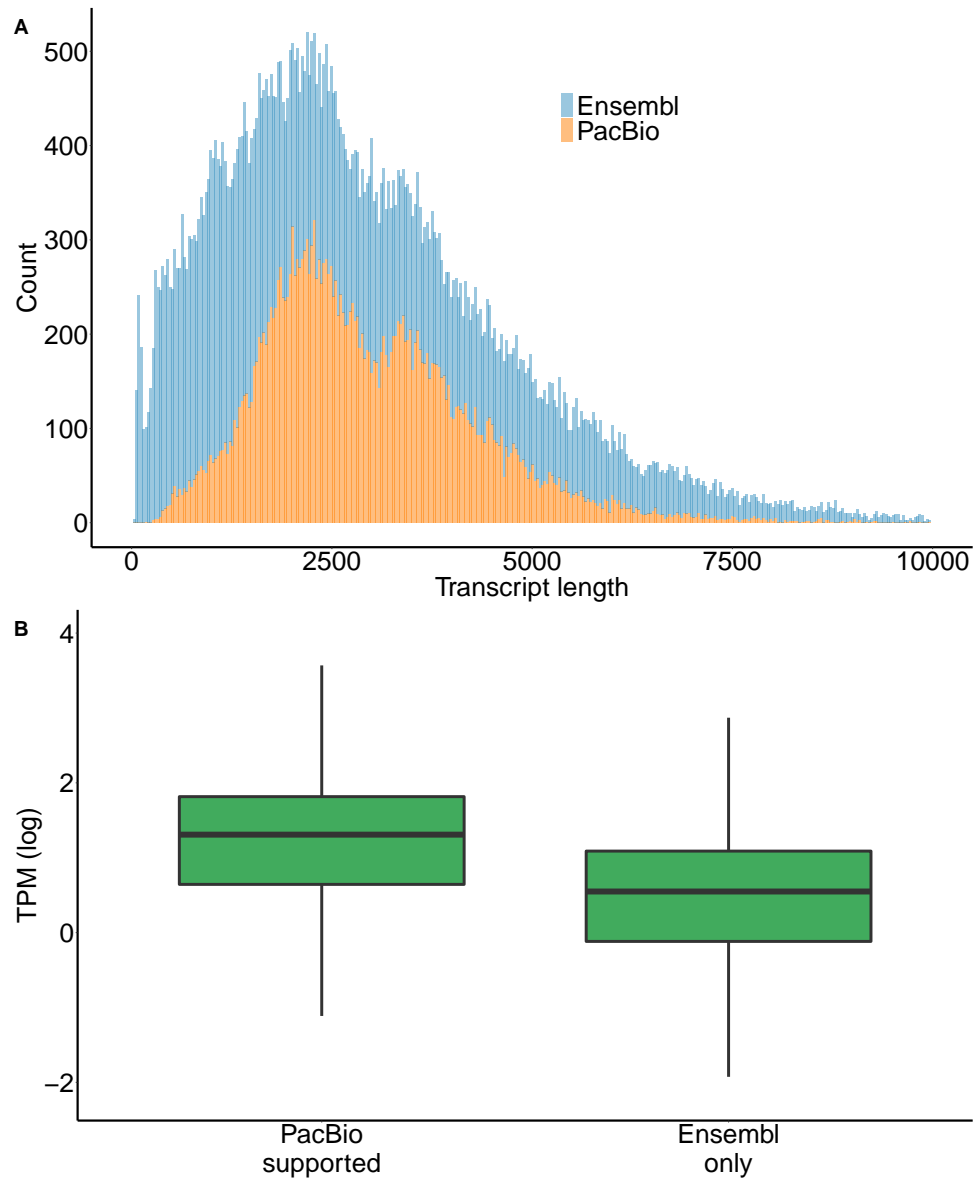

**Supplementary Figures 1:** (A) Length distributions of Ensembl transcripts and overlapping PacBio transcripts. About 65% of Ensembl transcripts overlap with PacBio transcripts. (B) Transcript abundance of PacBio-supported and Ensembl-only models. PacBio-supported models are gene models in Ensembl model set that have the corresponding PacBio set models. Ensembl-only models have no corresponding PacBio models. The gene expression level of the latter was much lower than that of the former.
