# Supplementary material for: Dynamic transcriptional and chromatin accessibility landscape of medaka embryogenesis
Source: HighWire-hosted journal article supplement (doi:10.1101/gr.258871.119), 2020-06-01
Supplement: Supplemental_Fig_S2.pdf [file Supplemental_Fig_S2.pdf]

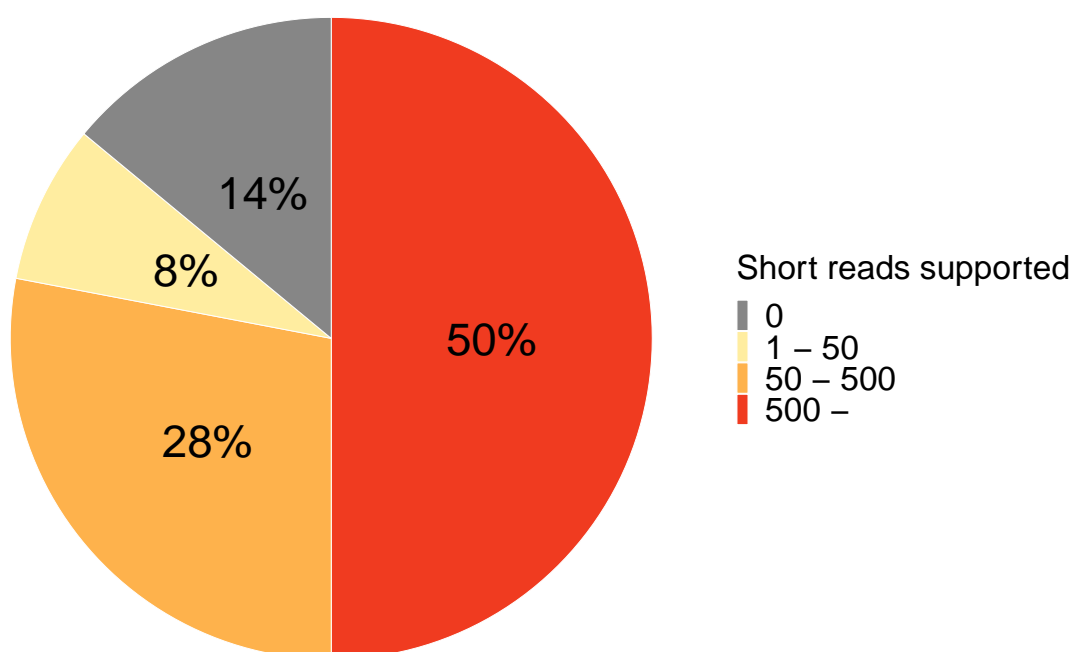

**Supplementary Figures 2:** Splice junctions from the IGDB set validated by the Illumina short reads. Splice junctions are classified into four groups depending on the numbers of short reads supported.
