# Supplementary material for: Dynamic transcriptional and chromatin accessibility landscape of medaka embryogenesis
Source: HighWire-hosted journal article supplement (doi:10.1101/gr.258871.119), 2020-06-01
Supplement: Supplemental_Fig_S11.pdf [file Supplemental_Fig_S11.pdf]

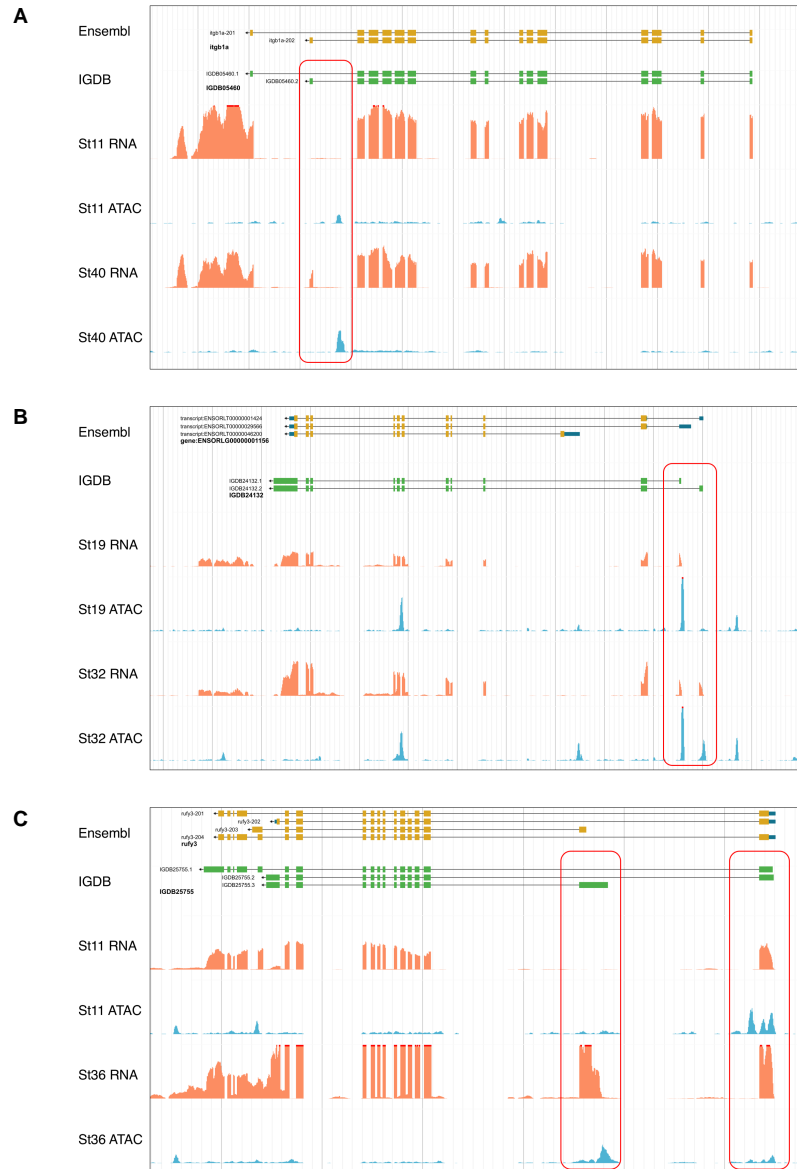

**Supplementary Figures 11:** Isoform switching and accessible elements switching. (A-C) Isoform switching events of gene IGDB05460, IGDB24132, and IGDB25755, and the corresponding ATAC-seq accessible elements switch in the promoter regions of different isoforms.
