# Supplementary material for: Dynamic transcriptional and chromatin accessibility landscape of medaka embryogenesis
Source: HighWire-hosted journal article supplement (doi:10.1101/gr.258871.119), 2020-06-01
Supplement: Supplemental_Fig_S13.pdf [file Supplemental_Fig_S13.pdf]

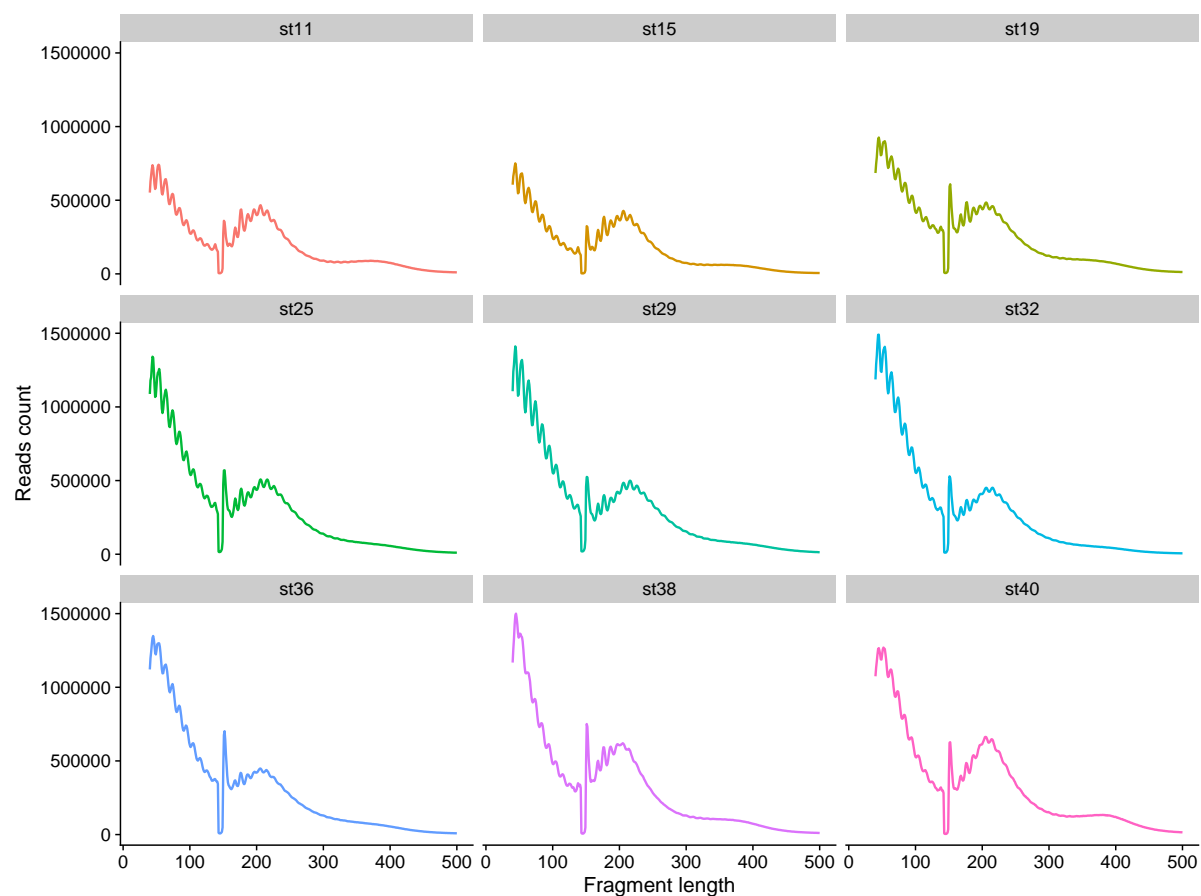

**Supplementary Figures 13:** ATAC-seq insert sizes determined by high-throughput sequencing. Adapters were not included and all fragments larger than 500 bp were removed.
