# Supplementary material for: Dynamic transcriptional and chromatin accessibility landscape of medaka embryogenesis
Source: HighWire-hosted journal article supplement (doi:10.1101/gr.258871.119), 2020-06-01
Supplement: Supplemental_Fig_S15.pdf [file Supplemental_Fig_S15.pdf]

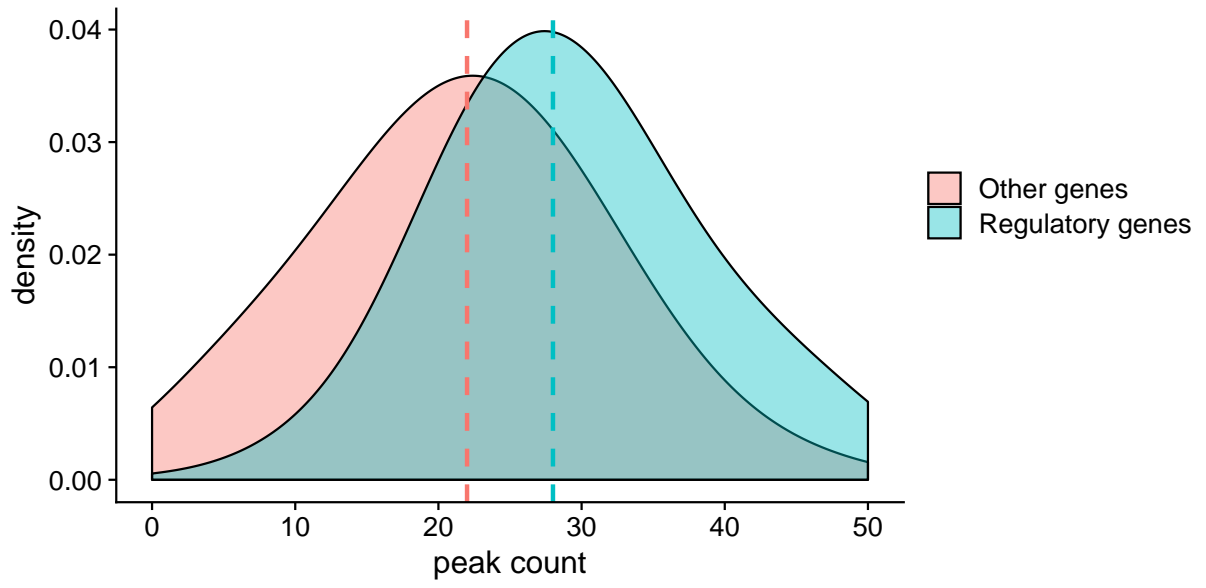

**Supplementary Figures 15:** Density plot of the number of accessible elements around regulatory genes or other genes ( $\pm 50$ kb). We calculated the number of accessible elements located within  $\pm 50$  Kb of the TSS of each gene, and found that genomic regions adjacent to regulatory genes contain more accessible elements than regions adjacent to other genes do (median 22 versus 28).
