# Supplementary material for: Dynamic transcriptional and chromatin accessibility landscape of medaka embryogenesis
Source: HighWire-hosted journal article supplement (doi:10.1101/gr.258871.119), 2020-06-01
Supplement: Supplemental_Fig_S16.pdf [file Supplemental_Fig_S16.pdf]

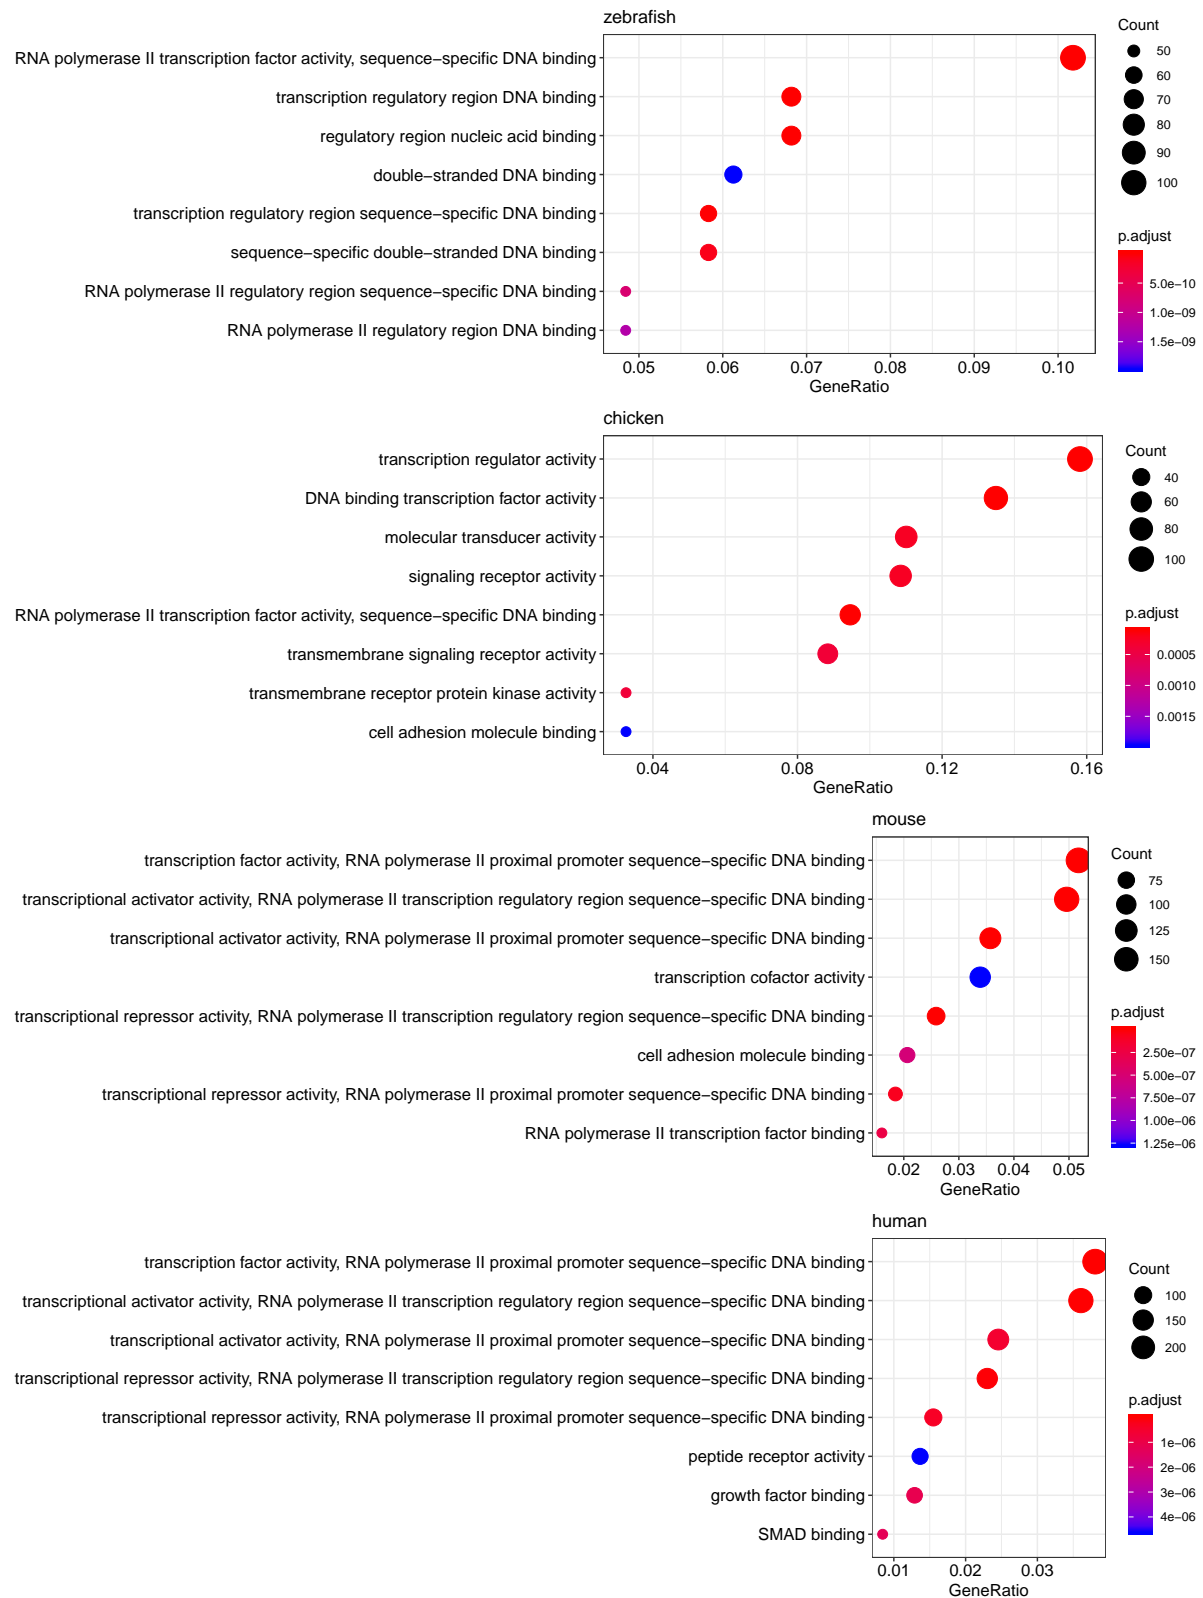

**Supplementary Figures 16:** GO analysis of genes with more than two distal elements in multiple species. All species showed a highly enrichment in ‘transcription regulator’ genes.
