# Supplementary material for: Dynamic transcriptional and chromatin accessibility landscape of medaka embryogenesis
Source: HighWire-hosted journal article supplement (doi:10.1101/gr.258871.119), 2020-06-01
Supplement: Supplemental_Fig_S17.pdf [file Supplemental_Fig_S17.pdf]

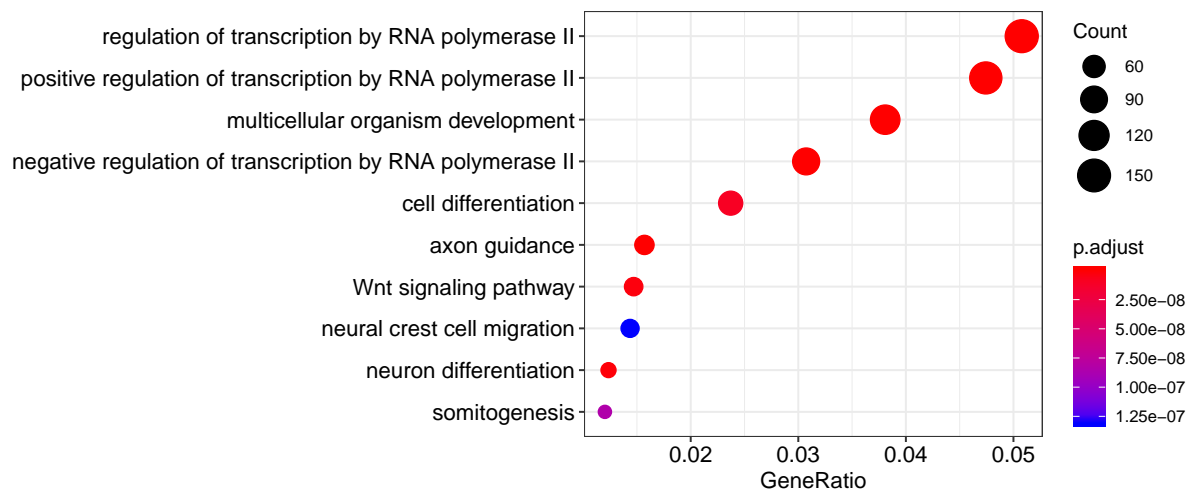

**Supplementary Figures 17:** GO analysis of genes which have more conserved ATAC peaks than non-conserved peaks (>2-fold) showed that they are enriched in 'regulation of transcription'.
