# Supplementary material for: Dynamic transcriptional and chromatin accessibility landscape of medaka embryogenesis
Source: HighWire-hosted journal article supplement (doi:10.1101/gr.258871.119), 2020-06-01
Supplement: Supplemental_Fig_S18.pdf [file Supplemental_Fig_S18.pdf]

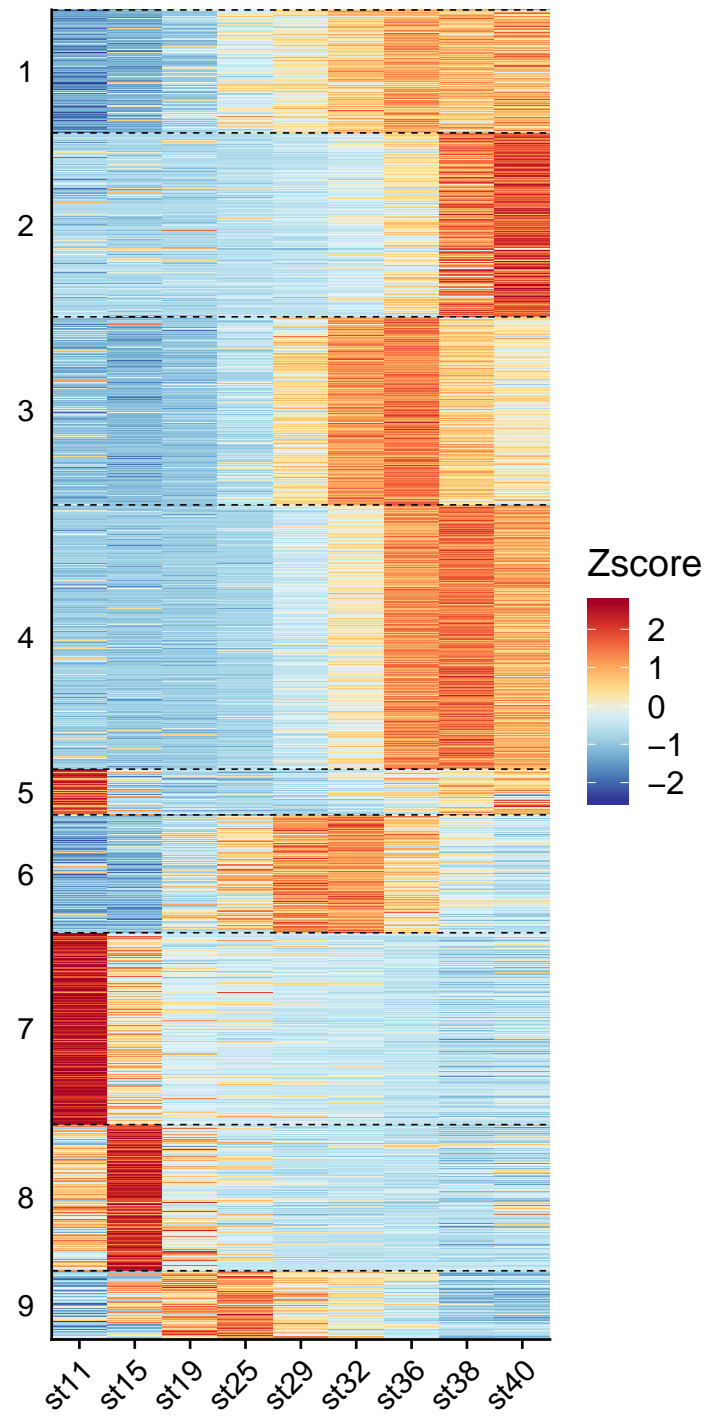

**Supplementary Figures 18:** K-means clustering of selected genes and gradually increased expression genes (in cluster 1, 2, 3, 4, 6, 8, and 9) were used to count early opening logic.
