# Supplementary material for: Dynamic transcriptional and chromatin accessibility landscape of medaka embryogenesis
Source: HighWire-hosted journal article supplement (doi:10.1101/gr.258871.119), 2020-06-01
Supplement: Supplemental_Fig_S19.pdf [file Supplemental_Fig_S19.pdf]

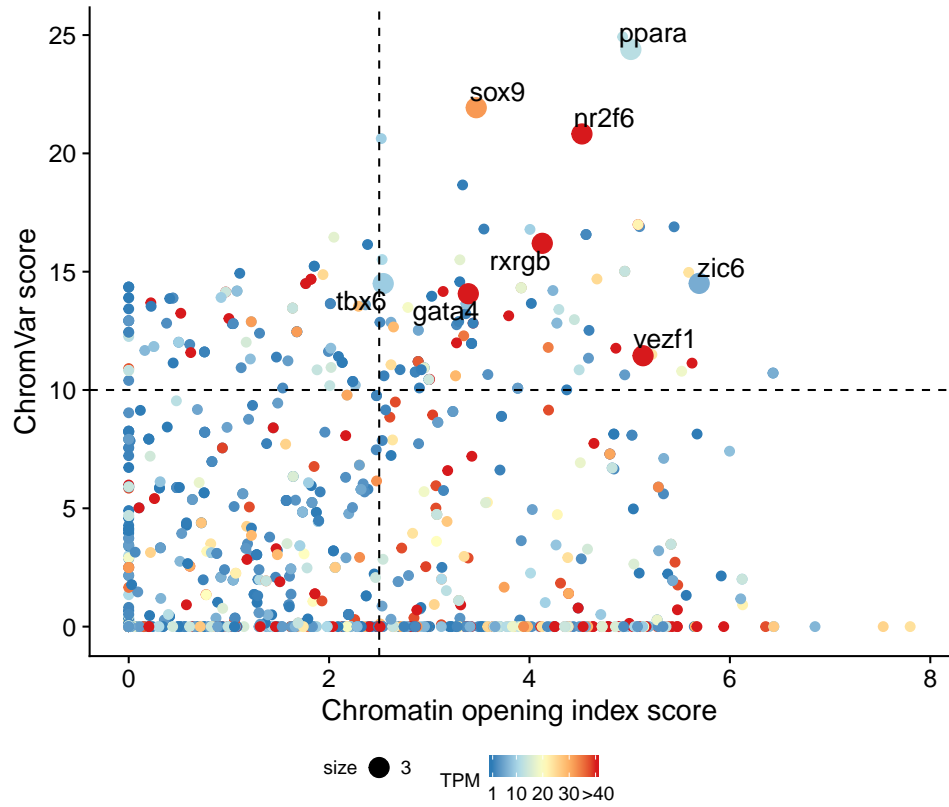

**Supplementary Figures 19:** Pioneer TF prediction at stage 19. Pioneer score is the x-axis, ChromVAR score is the y-axis, and the expression level is represented by the color. Pioneer TFs are those dots with high scores of three measurements, plotted with larger size.
