# Supplementary material for: Dynamic transcriptional and chromatin accessibility landscape of medaka embryogenesis
Source: HighWire-hosted journal article supplement (doi:10.1101/gr.258871.119), 2020-06-01
Supplement: Supplemental_Fig_S22.pdf [file Supplemental_Fig_S22.pdf]

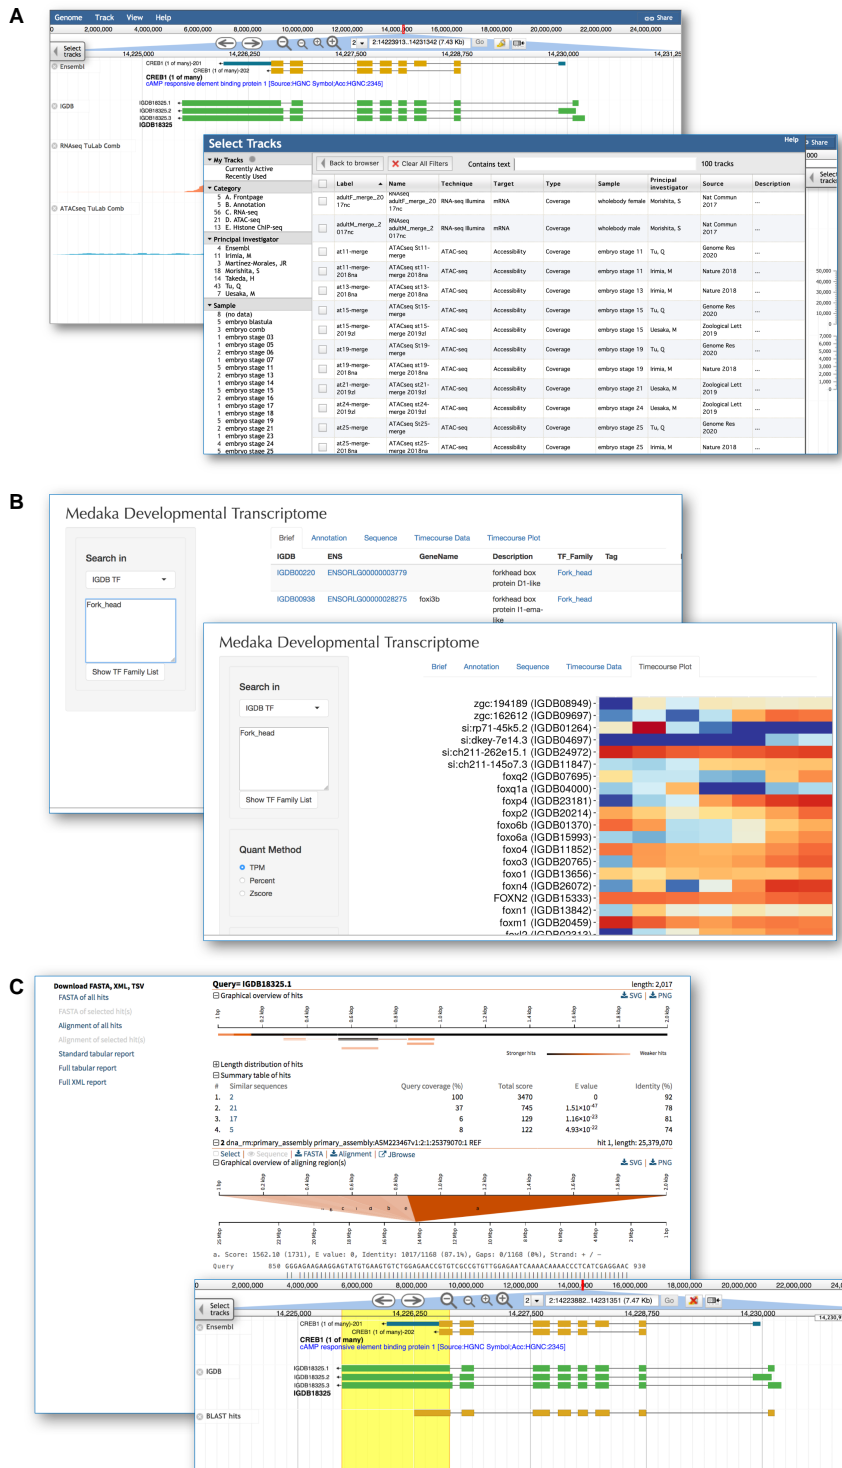

**Supplementary Figures 22:** Webtools for data query and visualization. (A) Genome browser, to search and visualize omics data of locus. (B) Gene viewer, to search and visualize gene annotation and expression data. (C) Sequence search (BLAST) tool, to search for similar sequences.
