# Supplementary material for: Dynamic transcriptional and chromatin accessibility landscape of medaka embryogenesis
Source: HighWire-hosted journal article supplement (doi:10.1101/gr.258871.119), 2020-06-01
Supplement: Supplemental_Fig_S23.pdf [file Supplemental_Fig_S23.pdf]

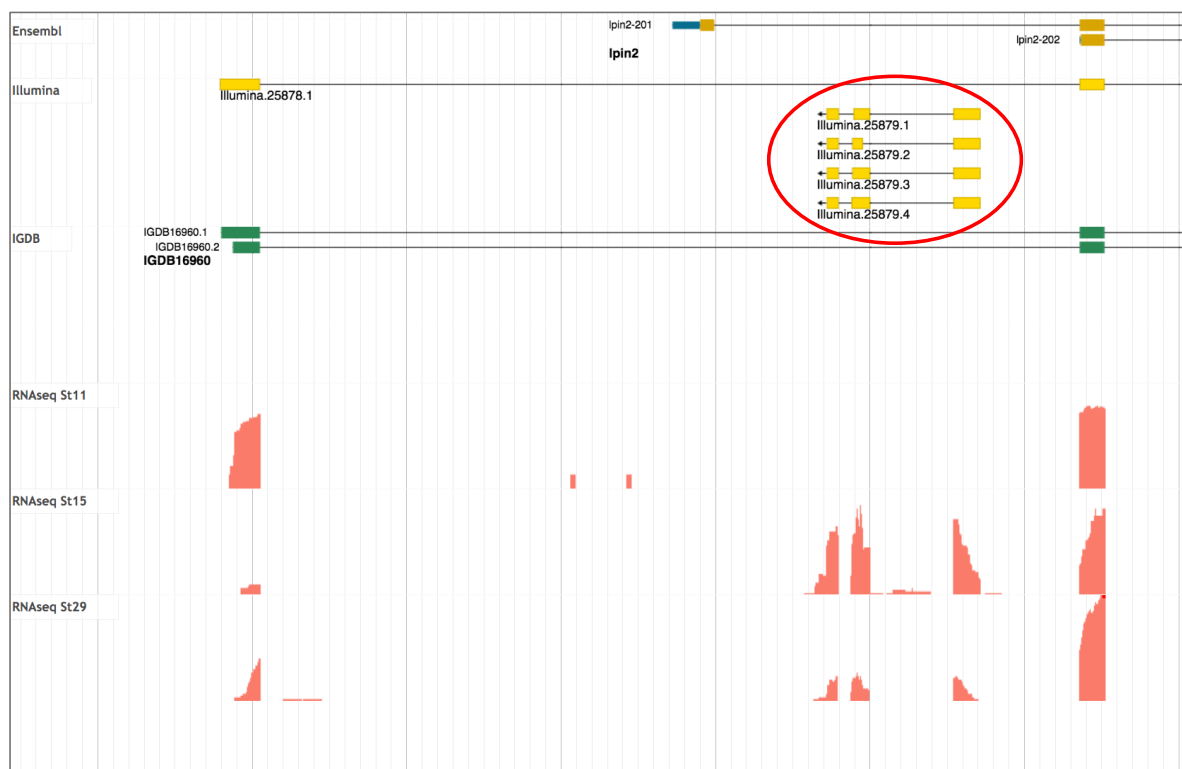

**Supplementary Figures 23:** LDAIR gene model. This lncRNA (red ellipse) was missed by the PacBio set, but was recovered from Illumina data. It is transiently expressed during stage 15 to 25.
